# Supplementary material for: Extracellular vesicles induce minimal hepatotoxicity and immunogenicity
Source: Royal Society of Chemistry journal article supplement (doi:10.1039/c8nr08720b), 2019-01-01
Supplement: c8nr08720b2.xlsx [file c8nr08720b2.xlsx]

## Sheet: RNASeq_exosomes_vs_control
ensgene	baseMean	log2FoldChange	lfcSE	stat	pvalue	padj	symbol	description	biotype	broadClass	geneSeqStart	geneSeqEnd	seqName	seqStrand	seqCoordSystem
ENSG00000212907	25045.4	-0.355808	0.0480296	-7.40797	1.28244e-13	1.28618e-09	MT-ND4L	mitochondrially encoded NADH:ubiquinone oxidoreductase core subunit 4L [Source:HGNC Symbol;Acc:HGNC:7460]	protein_coding	mito	10470	10766	MT	1	chromosome
ENSG00000240801	44.6955	0.735811	0.111437	7.36019	1.83648e-13	1.28618e-09	AC132217.1	NA	3prime_overlapping_ncRNA	other	2129121	2129964	11	-1	chromosome
ENSG00000184009	17479.2	-0.434557	0.063617	-6.83051	8.46126e-12	3.95056e-08	ACTG1	actin gamma 1 [Source:HGNC Symbol;Acc:HGNC:144]	protein_coding	coding	81509971	81523847	17	-1	chromosome
ENSG00000145592	6973.64	-0.373113	0.0552623	-6.75071	1.4712e-11	5.15177e-08	RPL37	ribosomal protein L37 [Source:HGNC Symbol;Acc:HGNC:10347]	protein_coding	coding	40825262	40835335	5	-1	chromosome
ENSG00000167244	7543.13	-0.40625	0.0606111	-6.70214	2.05387e-11	5.7537e-08	IGF2	insulin like growth factor 2 [Source:HGNC Symbol;Acc:HGNC:5466]	protein_coding	coding	2129112	2141238	11	-1	chromosome
ENSG00000196656	263.705	-0.895489	0.138799	-6.61307	3.76435e-11	8.78788e-08	AC004057.1	NA	transcribed_processed_pseudogene	pseudo	113214046	113217170	4	-1	chromosome
ENSG00000116688	1641.44	-0.451682	0.0692849	-6.51554	7.24262e-11	1.44925e-07	MFN2	mitofusin 2 [Source:HGNC Symbol;Acc:HGNC:16877]	protein_coding	coding	11980181	12013514	1	1	chromosome
ENSG00000167774	46.246	-0.579652	0.106296	-6.43967	1.19736e-10	2.09643e-07	AC010323.1	NA	protein_coding	coding	8308283	8321379	19	-1	chromosome
ENSG00000175166	3289.24	-0.348082	0.0557504	-6.24236	4.31028e-10	6.70823e-07	PSMD2	proteasome 26S subunit, non-ATPase 2 [Source:HGNC Symbol;Acc:HGNC:9559]	protein_coding	coding	184298709	184309054	3	1	chromosome
ENSG00000250264	32.0404	-0.678132	0.113177	-6.18507	6.2075e-10	8.69485e-07	AL669918.1	NA	protein_coding	coding	32813767	32838822	6	-1	chromosome
ENSG00000137207	1469.43	0.439182	0.0739088	5.94396	2.78214e-09	3.54267e-06	YIPF3	Yip1 domain family member 3 [Source:HGNC Symbol;Acc:HGNC:21023]	protein_coding	coding	43511827	43516990	6	-1	chromosome
ENSG00000116117	70.8654	0.698555	0.128011	5.78347	7.31751e-09	8.54136e-06	PARD3B	par-3 family cell polarity regulator beta [Source:HGNC Symbol;Acc:HGNC:14446]	protein_coding	coding	204545793	205620162	2	1	chromosome
ENSG00000175414	60.8538	0.467667	0.102747	5.76648	8.09428e-09	8.72127e-06	ARL10	ADP ribosylation factor like GTPase 10 [Source:HGNC Symbol;Acc:HGNC:22042]	protein_coding	coding	176365468	176401865	5	1	chromosome
ENSG00000167553	6828.95	-0.324896	0.0572065	-5.67866	1.35757e-08	1.35824e-05	TUBA1C	tubulin alpha 1c [Source:HGNC Symbol;Acc:HGNC:20768]	protein_coding	coding	49188736	49274603	12	1	chromosome
ENSG00000229117	11492.5	-0.30872	0.0558876	-5.5235	3.32314e-08	3.10315e-05	RPL41	ribosomal protein L41 [Source:HGNC Symbol;Acc:HGNC:10354]	protein_coding	coding	56116586	56117943	12	1	chromosome
ENSG00000261705	16.1834	0.290129	0.0788347	5.47474	4.38147e-08	3.8357e-05	NA	NA	NA	NA	NA	NA	NA	NA	NA
ENSG00000003756	1206.9	-0.478834	0.0878284	-5.44581	5.15698e-08	4.24904e-05	RBM5	RNA binding motif protein 5 [Source:HGNC Symbol;Acc:HGNC:9902]	protein_coding	coding	50088908	50119021	3	1	chromosome
ENSG00000196504	3571.03	0.439994	0.0818552	5.37646	7.59658e-08	5.91141e-05	PRPF40A	pre-mRNA processing factor 40 homolog A [Source:HGNC Symbol;Acc:HGNC:16463]	protein_coding	coding	152651593	152717997	2	-1	chromosome
ENSG00000114391	3861.46	0.33144	0.0635175	5.21839	1.80486e-07	0.000133056	RPL24	ribosomal protein L24 [Source:HGNC Symbol;Acc:HGNC:10325]	protein_coding	coding	101681091	101686782	3	-1	chromosome
ENSG00000160209	986.593	-0.407802	0.0782403	-5.20868	1.90193e-07	0.000133202	PDXK	pyridoxal kinase [Source:HGNC Symbol;Acc:HGNC:8819]	protein_coding	coding	43719094	43762307	21	1	chromosome
ENSG00000103550	938.018	0.420892	0.0852257	4.93976	7.82182e-07	0.000484685	KNOP1	lysine rich nucleolar protein 1 [Source:HGNC Symbol;Acc:HGNC:34404]	protein_coding	coding	19701934	19718235	16	-1	chromosome
ENSG00000133983	494.126	0.502176	0.101669	4.94028	7.80119e-07	0.000484685	COX16	COX16, cytochrome c oxidase assembly homolog [Source:HGNC Symbol;Acc:HGNC:20213]	protein_coding	coding	70325081	70359731	14	-1	chromosome
ENSG00000198786	43701.5	-0.249558	0.0505547	-4.93638	7.9587e-07	0.000484685	MT-ND5	mitochondrially encoded NADH:ubiquinone oxidoreductase core subunit 5 [Source:HGNC Symbol;Acc:HGNC:7461]	protein_coding	mito	12337	14148	MT	1	chromosome
ENSG00000143977	1590.41	-0.404858	0.082662	-4.89414	9.8735e-07	0.000576242	SNRPG	small nuclear ribonucleoprotein polypeptide G [Source:HGNC Symbol;Acc:HGNC:11163]	protein_coding	coding	70281362	70293771	2	-1	chromosome
ENSG00000092841	4224.59	-0.269254	0.0562602	-4.7851	1.70906e-06	0.00092099	MYL6	myosin light chain 6 [Source:HGNC Symbol;Acc:HGNC:7587]	protein_coding	coding	56158161	56163496	12	1	chromosome
ENSG00000140829	1199.38	-0.378348	0.0790388	-4.78504	1.70956e-06	0.00092099	DHX38	DEAH-box helicase 38 [Source:HGNC Symbol;Acc:HGNC:17211]	protein_coding	coding	72093562	72112912	16	1	chromosome
ENSG00000118271	1744.38	0.380465	0.0800579	4.75333	2.00094e-06	0.00100097	TTR	transthyretin [Source:HGNC Symbol;Acc:HGNC:12405]	protein_coding	coding	31591726	31599021	18	1	chromosome
ENSG00000197283	58.3352	-0.650708	0.136744	-4.75925	1.9431e-06	0.00100097	SYNGAP1	synaptic Ras GTPase activating protein 1 [Source:HGNC Symbol;Acc:HGNC:11497]	protein_coding	coding	33419661	33457541	6	1	chromosome
ENSG00000273184	12.3381	-0.326109	0.087575	-4.72726	2.27566e-06	0.00109914	AC010655.4	NA	processed_transcript	other	128455840	128493859	7	1	chromosome
ENSG00000089154	2559.92	-0.368739	0.0782574	-4.71032	2.47332e-06	0.00115479	GCN1	GCN1, eIF2 alpha kinase activator homolog [Source:HGNC Symbol;Acc:HGNC:4199]	protein_coding	coding	120127203	120194710	12	-1	chromosome
ENSG00000105877	23.2057	0.431166	0.104036	4.68537	2.79453e-06	0.00126267	DNAH11	dynein axonemal heavy chain 11 [Source:HGNC Symbol;Acc:HGNC:2942]	protein_coding	coding	21543215	21901839	7	1	chromosome
ENSG00000242372	2805.2	-0.283452	0.0608038	-4.66059	3.15304e-06	0.00138015	EIF6	eukaryotic translation initiation factor 6 [Source:HGNC Symbol;Acc:HGNC:6159]	protein_coding	coding	35278907	35284985	20	-1	chromosome
ENSG00000071127	2985.37	-0.289633	0.0622255	-4.65367	3.26072e-06	0.00138403	WDR1	WD repeat domain 1 [Source:HGNC Symbol;Acc:HGNC:12754]	protein_coding	coding	10074339	10116949	4	-1	chromosome
ENSG00000134291	908.359	-0.376323	0.0813142	-4.62438	3.75719e-06	0.00154785	TMEM106C	transmembrane protein 106C [Source:HGNC Symbol;Acc:HGNC:28775]	protein_coding	coding	47963569	47968878	12	1	chromosome
ENSG00000183010	2815.48	-0.282681	0.0616899	-4.58132	4.62057e-06	0.00184915	PYCR1	pyrroline-5-carboxylate reductase 1 [Source:HGNC Symbol;Acc:HGNC:9721]	protein_coding	coding	81932384	81942412	17	-1	chromosome
ENSG00000123416	13515.4	-0.219578	0.0482476	-4.55088	5.34208e-06	0.00207852	TUBA1B	tubulin alpha 1b [Source:HGNC Symbol;Acc:HGNC:18809]	protein_coding	coding	49127782	49131397	12	-1	chromosome
ENSG00000130402	4492.07	-0.334064	0.0742451	-4.49943	6.81372e-06	0.00257945	ACTN4	actinin alpha 4 [Source:HGNC Symbol;Acc:HGNC:166]	protein_coding	coding	38647649	38731583	19	1	chromosome
ENSG00000175931	676.596	-0.517969	0.115225	-4.4864	7.24377e-06	0.00267009	UBE2O	ubiquitin conjugating enzyme E2 O [Source:HGNC Symbol;Acc:HGNC:29554]	protein_coding	coding	76389451	76453206	17	-1	chromosome
ENSG00000123384	3313.09	-0.34957	0.0782264	-4.46818	7.88895e-06	0.00283335	LRP1	LDL receptor related protein 1 [Source:HGNC Symbol;Acc:HGNC:6692]	protein_coding	coding	57128493	57213351	12	1	chromosome
ENSG00000204961	14.2995	-0.380432	0.0940314	-4.46224	8.11075e-06	0.00284018	PCDHA9	protocadherin alpha 9 [Source:HGNC Symbol;Acc:HGNC:8675]	protein_coding	coding	140847463	141012344	5	1	chromosome
ENSG00000143850	401.816	-0.594254	0.134416	-4.40735	1.04641e-05	0.00357491	PLEKHA6	pleckstrin homology domain containing A6 [Source:HGNC Symbol;Acc:HGNC:17053]	protein_coding	coding	204218851	204377665	1	-1	chromosome
ENSG00000020577	494.536	0.528224	0.120471	4.39349	1.11548e-05	0.00372011	SAMD4A	sterile alpha motif domain containing 4A [Source:HGNC Symbol;Acc:HGNC:23023]	protein_coding	coding	54567097	54793315	14	1	chromosome
ENSG00000274944	107.346	-0.13673	0.0590498	-4.37194	1.23146e-05	0.00401142	AL139260.3	NA	protein_coding	coding	38864501	38881617	1	-1	chromosome
ENSG00000125991	2578.43	-0.323986	0.0742245	-4.36329	1.28122e-05	0.00407864	ERGIC3	ERGIC and golgi 3 [Source:HGNC Symbol;Acc:HGNC:15927]	protein_coding	coding	35542021	35557634	20	1	chromosome
ENSG00000160285	2246.35	-0.284601	0.065547	-4.34082	1.4195e-05	0.00432237	LSS	lanosterol synthase [Source:HGNC Symbol;Acc:HGNC:6708]	protein_coding	coding	46188141	46228824	21	-1	chromosome
ENSG00000171858	5473.12	-0.322363	0.0742432	-4.34114	1.41743e-05	0.00432237	RPS21	ribosomal protein S21 [Source:HGNC Symbol;Acc:HGNC:10409]	protein_coding	coding	62387116	62388520	20	1	chromosome
ENSG00000010256	1909.21	-0.312525	0.0721748	-4.32812	1.50386e-05	0.00448181	UQCRC1	ubiquinol-cytochrome c reductase core protein I [Source:HGNC Symbol;Acc:HGNC:12585]	protein_coding	coding	48599002	48610976	3	-1	chromosome
ENSG00000129250	2149.91	-0.346909	0.0803395	-4.31813	1.57354e-05	0.00459178	KIF1C	kinesin family member 1C [Source:HGNC Symbol;Acc:HGNC:6317]	protein_coding	coding	4997948	5028401	17	1	chromosome
ENSG00000188452	24.6759	0.162047	0.0631655	4.3101	1.6318e-05	0.00466462	CERKL	ceramide kinase like [Source:HGNC Symbol;Acc:HGNC:21699]	protein_coding	coding	181536676	181680665	2	-1	chromosome
ENSG00000171316	1108.36	0.505808	0.117802	4.29538	1.74395e-05	0.00488551	CHD7	chromodomain helicase DNA binding protein 7 [Source:HGNC Symbol;Acc:HGNC:20626]	protein_coding	coding	60678778	60868028	8	1	chromosome
ENSG00000115524	7956.74	-0.265366	0.0620378	-4.27715	1.893e-05	0.00519907	SF3B1	splicing factor 3b subunit 1 [Source:HGNC Symbol;Acc:HGNC:10768]	protein_coding	coding	197389784	197435091	2	-1	chromosome
ENSG00000220842	1839.66	0.41584	0.0987428	4.21095	2.54296e-05	0.00684985	RPL21P16	ribosomal protein L21 pseudogene 16 [Source:HGNC Symbol;Acc:HGNC:31396]	processed_pseudogene	pseudo	120354701	120355183	10	-1	chromosome
ENSG00000127418	512.755	-0.464104	0.110827	-4.18243	2.88407e-05	0.00762001	FGFRL1	fibroblast growth factor receptor like 1 [Source:HGNC Symbol;Acc:HGNC:3693]	protein_coding	coding	1009936	1026897	4	1	chromosome
ENSG00000135473	461.888	0.481652	0.115433	4.17727	2.95032e-05	0.00762001	PAN2	PAN2 poly(A) specific ribonuclease subunit [Source:HGNC Symbol;Acc:HGNC:20074]	protein_coding	coding	56316223	56334053	12	-1	chromosome
ENSG00000170315	6444.07	-0.303657	0.0727364	-4.17407	2.99208e-05	0.00762001	UBB	ubiquitin B [Source:HGNC Symbol;Acc:HGNC:12463]	protein_coding	coding	16380798	16382745	17	1	chromosome
ENSG00000125107	5753.76	-0.230543	0.0553385	-4.1658	3.10268e-05	0.00776058	CNOT1	CCR4-NOT transcription complex subunit 1 [Source:HGNC Symbol;Acc:HGNC:7877]	protein_coding	coding	58519951	58629886	16	-1	chromosome
ENSG00000276550	795.487	-0.416323	0.0999038	-4.16168	3.15919e-05	0.0077633	HERC2P2	hect domain and RLD 2 pseudogene 2 [Source:HGNC Symbol;Acc:HGNC:4870]	transcribed_unprocessed_pseudogene	pseudo	22495570	22590815	15	1	chromosome
ENSG00000138346	322.472	-0.51387	0.123205	-4.15395	3.26786e-05	0.00789189	DNA2	DNA replication helicase/nuclease 2 [Source:HGNC Symbol;Acc:HGNC:2939]	protein_coding	coding	68414064	68472121	10	-1	chromosome
ENSG00000115053	18880.5	0.207353	0.0500928	4.13946	3.48122e-05	0.00826465	NCL	nucleolin [Source:HGNC Symbol;Acc:HGNC:7667]	protein_coding	coding	231453531	231483641	2	-1	chromosome
ENSG00000171236	437.446	0.436563	0.106083	4.11805	3.82097e-05	0.00892006	LRG1	leucine rich alpha-2-glycoprotein 1 [Source:HGNC Symbol;Acc:HGNC:29480]	protein_coding	coding	4536409	4540474	19	-1	chromosome
ENSG00000117632	4069.07	0.284247	0.0693157	4.10073	4.11856e-05	0.00916188	STMN1	stathmin 1 [Source:HGNC Symbol;Acc:HGNC:6510]	protein_coding	coding	25884181	25906991	1	-1	chromosome
ENSG00000126267	1192.38	-0.296509	0.0722721	-4.1006	4.12079e-05	0.00916188	COX6B1	cytochrome c oxidase subunit 6B1 [Source:HGNC Symbol;Acc:HGNC:2280]	protein_coding	coding	35648223	35658861	19	1	chromosome
ENSG00000172893	1687.14	-0.34542	0.0840797	-4.10568	4.03133e-05	0.00916188	DHCR7	7-dehydrocholesterol reductase [Source:HGNC Symbol;Acc:HGNC:2860]	protein_coding	coding	71428193	71452868	11	-1	chromosome
ENSG00000100664	3249.28	-0.282041	0.068839	-4.09647	4.19499e-05	0.00918112	EIF5	eukaryotic translation initiation factor 5 [Source:HGNC Symbol;Acc:HGNC:3299]	protein_coding	coding	103333544	103345025	14	1	chromosome
ENSG00000114126	250.1	0.527088	0.130061	4.05351	5.0455e-05	0.0105019	TFDP2	transcription factor Dp-2 [Source:HGNC Symbol;Acc:HGNC:11751]	protein_coding	coding	141944428	142149544	3	-1	chromosome
ENSG00000126247	1689.53	-0.357431	0.0883427	-4.04386	5.25777e-05	0.0105019	CAPNS1	calpain small subunit 1 [Source:HGNC Symbol;Acc:HGNC:1481]	protein_coding	coding	36139575	36150353	19	1	chromosome
ENSG00000159363	322.089	-0.465776	0.114929	-4.04511	5.22994e-05	0.0105019	ATP13A2	ATPase 13A2 [Source:HGNC Symbol;Acc:HGNC:30213]	protein_coding	coding	16985958	17011928	1	-1	chromosome
ENSG00000159433	250.314	-0.518889	0.127876	-4.04096	5.32331e-05	0.0105019	STARD9	StAR related lipid transfer domain containing 9 [Source:HGNC Symbol;Acc:HGNC:19162]	protein_coding	coding	42575659	42720981	15	1	chromosome
ENSG00000167088	1643.02	-0.277235	0.0685292	-4.04408	5.253e-05	0.0105019	SNRPD1	small nuclear ribonucleoprotein D1 polypeptide [Source:HGNC Symbol;Acc:HGNC:11158]	protein_coding	coding	21612267	21633524	18	1	chromosome
ENSG00000170089	445.504	-0.438669	0.108111	-4.05178	5.08297e-05	0.0105019	AC106795.1	NA	transcribed_unprocessed_pseudogene	pseudo	177809407	177950732	5	1	chromosome
ENSG00000198356	449.639	-0.43164	0.106311	-4.05083	5.1036e-05	0.0105019	ASNA1	arsA arsenite transporter, ATP-binding, homolog 1 (bacterial) [Source:HGNC Symbol;Acc:HGNC:752]	protein_coding	coding	12737139	12748323	19	1	chromosome
ENSG00000165916	1398.25	-0.305369	0.0756213	-4.036	5.43694e-05	0.0105771	PSMC3	proteasome 26S subunit, ATPase 3 [Source:HGNC Symbol;Acc:HGNC:9549]	protein_coding	coding	47418769	47426473	11	-1	chromosome
ENSG00000277443	1695.28	0.29169	0.0723669	4.03172	5.537e-05	0.0106242	MARCKS	myristoylated alanine rich protein kinase C substrate [Source:HGNC Symbol;Acc:HGNC:6759]	protein_coding	coding	113857362	113863471	6	1	chromosome
ENSG00000060339	1859.81	0.277643	0.0690633	4.02091	5.79742e-05	0.010648	CCAR1	cell division cycle and apoptosis regulator 1 [Source:HGNC Symbol;Acc:HGNC:24236]	protein_coding	coding	68721012	68792377	10	1	chromosome
ENSG00000105325	291.287	-0.475119	0.117908	-4.01972	5.82663e-05	0.010648	FZR1	fizzy and cell division cycle 20 related 1 [Source:HGNC Symbol;Acc:HGNC:24824]	protein_coding	coding	3506273	3538330	19	1	chromosome
ENSG00000139343	1122.36	-0.336893	0.0837997	-4.01864	5.85348e-05	0.010648	SNRPF	small nuclear ribonucleoprotein polypeptide F [Source:HGNC Symbol;Acc:HGNC:11162]	protein_coding	coding	95858928	95903828	12	1	chromosome
ENSG00000143158	905.736	0.387842	0.09632	4.02717	5.64517e-05	0.010648	MPC2	mitochondrial pyruvate carrier 2 [Source:HGNC Symbol;Acc:HGNC:24515]	protein_coding	coding	167916729	167937040	1	-1	chromosome
ENSG00000182208	140.089	-0.540877	0.134408	-4.00847	6.11137e-05	0.0109746	MOB2	MOB kinase activator 2 [Source:HGNC Symbol;Acc:HGNC:24904]	protein_coding	coding	1469457	1501247	11	-1	chromosome
ENSG00000114850	3046.3	-0.281758	0.0704169	-4.00006	6.33252e-05	0.0112278	SSR3	signal sequence receptor subunit 3 [Source:HGNC Symbol;Acc:HGNC:11325]	protein_coding	coding	156540140	156555184	3	-1	chromosome
ENSG00000174231	4759.13	-0.227249	0.0568633	-3.99618	6.43727e-05	0.0112709	PRPF8	pre-mRNA processing factor 8 [Source:HGNC Symbol;Acc:HGNC:17340]	protein_coding	coding	1650629	1684882	17	-1	chromosome
ENSG00000119862	253.001	-0.502978	0.125871	-3.98474	6.75527e-05	0.0115392	LGALSL	galectin like [Source:HGNC Symbol;Acc:HGNC:25012]	protein_coding	coding	64453969	64461381	2	1	chromosome
ENSG00000134352	3767.97	-0.279175	0.0700454	-3.985	6.74801e-05	0.0115392	IL6ST	interleukin 6 signal transducer [Source:HGNC Symbol;Acc:HGNC:6021]	protein_coding	coding	55935095	55994993	5	-1	chromosome
ENSG00000089006	13583.7	0.204416	0.0513693	3.97938	6.90947e-05	0.0116604	SNX5	sorting nexin 5 [Source:HGNC Symbol;Acc:HGNC:14969]	protein_coding	coding	17941597	17968980	20	-1	chromosome
ENSG00000092758	1907.98	0.285816	0.0719385	3.97317	7.09217e-05	0.0118262	COL9A3	collagen type IX alpha 3 chain [Source:HGNC Symbol;Acc:HGNC:2219]	protein_coding	coding	62816244	62841159	20	1	chromosome
ENSG00000127022	12380.5	-0.229206	0.0577969	-3.96572	7.31735e-05	0.0120581	CANX	calnexin [Source:HGNC Symbol;Acc:HGNC:1473]	protein_coding	coding	179678628	179730925	5	1	chromosome
ENSG00000169439	3755.26	0.288932	0.0729617	3.96015	7.49025e-05	0.0120726	SDC2	syndecan 2 [Source:HGNC Symbol;Acc:HGNC:10659]	protein_coding	coding	96493351	96611780	8	1	chromosome
ENSG00000198265	1078.7	-0.368084	0.0929167	-3.95989	7.49851e-05	0.0120726	HELZ	helicase with zinc finger [Source:HGNC Symbol;Acc:HGNC:16878]	protein_coding	coding	67070438	67245989	17	-1	chromosome
ENSG00000136448	2255.63	-0.397345	0.100457	-3.95415	7.68056e-05	0.0122252	NMT1	N-myristoyltransferase 1 [Source:HGNC Symbol;Acc:HGNC:7857]	protein_coding	coding	45051610	45109016	17	1	chromosome
ENSG00000197782	302.227	0.491117	0.124429	3.94775	7.88876e-05	0.0122775	ZNF780A	zinc finger protein 780A [Source:HGNC Symbol;Acc:HGNC:27603]	protein_coding	coding	40069152	40090938	19	-1	chromosome
ENSG00000241933	19.8476	0.144113	0.0599233	3.94945	7.83323e-05	0.0122775	AC114480.1	NA	lincRNA	noncoding	57693205	57696596	3	1	chromosome
ENSG00000100030	2559.99	-0.377018	0.0955858	-3.94259	8.0606e-05	0.0124071	MAPK1	mitogen-activated protein kinase 1 [Source:HGNC Symbol;Acc:HGNC:6871]	protein_coding	coding	21754500	21867680	22	-1	chromosome
ENSG00000175354	581.416	0.427946	0.108987	3.93099	8.45955e-05	0.0128797	PTPN2	protein tyrosine phosphatase, non-receptor type 2 [Source:HGNC Symbol;Acc:HGNC:9650]	protein_coding	coding	12785478	12929643	18	-1	chromosome
ENSG00000210140	174.773	0.538949	0.138672	3.924	8.70908e-05	0.013117	MT-TC	mitochondrially encoded tRNA cysteine [Source:HGNC Symbol;Acc:HGNC:7477]	Mt_tRNA	mito	5761	5826	MT	-1	chromosome
ENSG00000118181	6344.58	0.279588	0.0713273	3.9197	8.8658e-05	0.013211	RPS25	ribosomal protein S25 [Source:HGNC Symbol;Acc:HGNC:10413]	protein_coding	coding	119015712	119018691	11	-1	chromosome
ENSG00000140263	1441.34	-0.340648	0.0872671	-3.90042	9.60249e-05	0.0141581	SORD	sorbitol dehydrogenase [Source:HGNC Symbol;Acc:HGNC:11184]	protein_coding	coding	45023104	45077185	15	1	chromosome
ENSG00000181019	9180.7	0.251106	0.0644787	3.89436	9.84595e-05	0.0142868	NQO1	NAD(P)H quinone dehydrogenase 1 [Source:HGNC Symbol;Acc:HGNC:2874]	protein_coding	coding	69706996	69726951	16	-1	chromosome
ENSG00000183091	72.263	0.443722	0.119115	3.89318	9.89376e-05	0.0142868	NEB	nebulin [Source:HGNC Symbol;Acc:HGNC:7720]	protein_coding	coding	151485336	151734487	2	-1	chromosome
ENSG00000008513	890.313	-0.320919	0.0826352	-3.88057	0.000104214	0.0148951	ST3GAL1	ST3 beta-galactoside alpha-2,3-sialyltransferase 1 [Source:HGNC Symbol;Acc:HGNC:10862]	protein_coding	coding	133454848	133571940	8	-1	chromosome
ENSG00000068654	1331.46	-0.377206	0.0972903	-3.87544	0.000106434	0.0149082	POLR1A	RNA polymerase I subunit A [Source:HGNC Symbol;Acc:HGNC:17264]	protein_coding	coding	86020216	86106155	2	-1	chromosome
ENSG00000160014	3641.7	-0.22161	0.0571692	-3.87601	0.000106185	0.0149082	CALM3	calmodulin 3 [Source:HGNC Symbol;Acc:HGNC:1449]	protein_coding	coding	46601074	46610793	19	1	chromosome
ENSG00000197256	313.418	-0.507642	0.131205	-3.85533	0.000115572	0.0159699	KANK2	KN motif and ankyrin repeat domains 2 [Source:HGNC Symbol;Acc:HGNC:29300]	protein_coding	coding	11164267	11197791	19	-1	chromosome
ENSG00000235489	23.9554	0.145833	0.0608765	3.85381	0.000116294	0.0159699	DBF4P1	DBF4 zinc finger pseudogene 1 [Source:HGNC Symbol;Acc:HGNC:45059]	processed_pseudogene	pseudo	64168959	64170850	10	-1	chromosome
ENSG00000166340	1335.19	-0.296286	0.0769211	-3.8502	0.000118022	0.0160499	TPP1	tripeptidyl peptidase 1 [Source:HGNC Symbol;Acc:HGNC:2073]	protein_coding	coding	6612763	6619461	11	-1	chromosome
ENSG00000056050	177.566	0.489024	0.127347	3.84411	0.000120989	0.0162952	HPF1	histone PARylation factor 1 [Source:HGNC Symbol;Acc:HGNC:26051]	protein_coding	coding	169729465	169757953	4	-1	chromosome
ENSG00000167615	822.443	-0.402287	0.104717	-3.8408	0.000122632	0.0163591	LENG8	leukocyte receptor cluster member 8 [Source:HGNC Symbol;Acc:HGNC:15500]	protein_coding	coding	54448887	54462037	19	1	chromosome
ENSG00000140090	25.4245	0.209356	0.0742091	3.82465	0.000130959	0.0171972	SLC24A4	solute carrier family 24 member 4 [Source:HGNC Symbol;Acc:HGNC:10978]	protein_coding	coding	92322581	92501483	14	1	chromosome
ENSG00000167747	876.075	-0.331863	0.0867253	-3.82388	0.00013137	0.0171972	C19orf48	chromosome 19 open reading frame 48 [Source:HGNC Symbol;Acc:HGNC:29667]	protein_coding	coding	50797704	50804929	19	-1	chromosome
ENSG00000167780	313.523	-0.474851	0.123784	-3.82155	0.000132616	0.0171996	SOAT2	sterol O-acyltransferase 2 [Source:HGNC Symbol;Acc:HGNC:11178]	protein_coding	coding	53103518	53124538	12	1	chromosome
ENSG00000144028	5592.85	-0.225059	0.0589451	-3.81768	0.000134713	0.0173112	SNRNP200	small nuclear ribonucleoprotein U5 subunit 200 [Source:HGNC Symbol;Acc:HGNC:30859]	protein_coding	coding	96274336	96305515	2	-1	chromosome
ENSG00000090372	588.662	-0.414208	0.108626	-3.80894	0.000139565	0.0177717	STRN4	striatin 4 [Source:HGNC Symbol;Acc:HGNC:15721]	protein_coding	coding	46719507	46746994	19	-1	chromosome
ENSG00000122218	3018.12	-0.21771	0.0572179	-3.8045	0.000142091	0.0179303	COPA	coatomer protein complex subunit alpha [Source:HGNC Symbol;Acc:HGNC:2230]	protein_coding	coding	160289273	160343400	1	-1	chromosome
ENSG00000100603	835.275	0.388784	0.102306	3.80204	0.000143511	0.0179479	SNW1	SNW domain containing 1 [Source:HGNC Symbol;Acc:HGNC:16696]	protein_coding	coding	77717599	77761207	14	-1	chromosome
ENSG00000148303	13840.3	-0.179595	0.0474236	-3.78689	0.000152544	0.0187404	RPL7A	ribosomal protein L7a [Source:HGNC Symbol;Acc:HGNC:10364]	protein_coding	coding	133348214	133351426	9	1	chromosome
ENSG00000150991	12796.8	-0.178631	0.0471957	-3.78475	0.000153862	0.0187404	UBC	ubiquitin C [Source:HGNC Symbol;Acc:HGNC:12468]	protein_coding	coding	124911604	124917368	12	-1	chromosome
ENSG00000237550	7279.6	0.24355	0.0643412	3.78522	0.000153575	0.0187404	RPL9P9	ribosomal protein L9 pseudogene 9 [Source:HGNC Symbol;Acc:HGNC:17251]	transcribed_processed_pseudogene	pseudo	82372196	82372912	15	-1	chromosome
ENSG00000113739	892.539	-0.364822	0.096548	-3.77811	0.000158024	0.0189183	STC2	stanniocalcin 2 [Source:HGNC Symbol;Acc:HGNC:11374]	protein_coding	coding	173314713	173329503	5	-1	chromosome
ENSG00000114098	539.696	-0.395242	0.10438	-3.78024	0.000156677	0.0189183	ARMC8	armadillo repeat containing 8 [Source:HGNC Symbol;Acc:HGNC:24999]	protein_coding	coding	138187248	138298389	3	1	chromosome
ENSG00000135821	4725.16	-0.260716	0.0695684	-3.74699	0.000178967	0.0210655	GLUL	glutamate-ammonia ligase [Source:HGNC Symbol;Acc:HGNC:4341]	protein_coding	coding	182381704	182392206	1	-1	chromosome
ENSG00000229927	67.6493	0.498718	0.133922	3.74791	0.000178317	0.0210655	RHEBP1	Ras-homolog enriched in brain pseudogene 1 [Source:HGNC Symbol;Acc:HGNC:10010]	processed_pseudogene	pseudo	46634911	46635466	10	-1	chromosome
ENSG00000078902	492.04	-0.428415	0.114231	-3.74189	0.000182638	0.0211743	TOLLIP	toll interacting protein [Source:HGNC Symbol;Acc:HGNC:16476]	protein_coding	coding	1274371	1309654	11	-1	chromosome
ENSG00000167291	920.005	-0.344021	0.0918845	-3.74151	0.000182915	0.0211743	TBC1D16	TBC1 domain family member 16 [Source:HGNC Symbol;Acc:HGNC:28356]	protein_coding	coding	79932343	80035848	17	-1	chromosome
ENSG00000159307	11.9815	-0.28116	0.0863619	-3.73144	0.000190386	0.0218585	SCUBE1	signal peptide, CUB domain and EGF like domain containing 1 [Source:HGNC Symbol;Acc:HGNC:13441]	protein_coding	coding	43197283	43343388	22	-1	chromosome
ENSG00000172869	466.19	0.488296	0.13135	3.72593	0.000194594	0.02216	DMXL1	Dmx like 1 [Source:HGNC Symbol;Acc:HGNC:2937]	protein_coding	coding	119037772	119249138	5	1	chromosome
ENSG00000119820	736.082	0.41913	0.11273	3.72071	0.000198665	0.0224412	YIPF4	Yip1 domain family member 4 [Source:HGNC Symbol;Acc:HGNC:28145]	protein_coding	coding	32277910	32316594	2	1	chromosome
ENSG00000248503	141.336	-0.499142	0.133978	-3.71631	0.000202157	0.0226529	AL356235.1	NA	transcribed_processed_pseudogene	pseudo	77910741	77964890	X	1	chromosome
ENSG00000112096	2798	-0.234668	0.0632443	-3.71024	0.000207064	0.0228374	SOD2	superoxide dismutase 2 [Source:HGNC Symbol;Acc:HGNC:11180]	protein_coding	coding	159669057	159762529	6	-1	chromosome
ENSG00000132207	172.681	0.513027	0.139287	3.71205	0.000205585	0.0228374	SLX1A	SLX1 homolog A, structure-specific endonuclease subunit [Source:HGNC Symbol;Acc:HGNC:20922]	protein_coding	coding	30193887	30197561	16	1	chromosome
ENSG00000164190	1066.25	0.352273	0.0950861	3.7073	0.000209477	0.022923	NIPBL	NIPBL, cohesin loading factor [Source:HGNC Symbol;Acc:HGNC:28862]	protein_coding	coding	36876759	37066413	5	1	chromosome
ENSG00000134287	1324.62	-0.365738	0.0988975	-3.69463	0.000220203	0.0236805	ARF3	ADP ribosylation factor 3 [Source:HGNC Symbol;Acc:HGNC:654]	protein_coding	coding	48935723	48957551	12	-1	chromosome
ENSG00000141564	641.228	-0.339361	0.0917403	-3.69601	0.00021901	0.0236805	RPTOR	regulatory associated protein of MTOR complex 1 [Source:HGNC Symbol;Acc:HGNC:30287]	protein_coding	coding	80544819	80966371	17	1	chromosome
ENSG00000184007	1931.51	0.247927	0.0671388	3.69318	0.000221471	0.0236805	PTP4A2	protein tyrosine phosphatase type IVA, member 2 [Source:HGNC Symbol;Acc:HGNC:9635]	protein_coding	coding	31906421	31944856	1	-1	chromosome
ENSG00000169100	4356.68	-0.233229	0.0632483	-3.68695	0.00022696	0.0239025	SLC25A6	solute carrier family 25 member 6 [Source:HGNC Symbol;Acc:HGNC:10992]	protein_coding	coding	1386152	1392724	X	-1	chromosome
ENSG00000189067	3101.9	0.215975	0.0585737	3.68756	0.000226417	0.0239025	LITAF	lipopolysaccharide induced TNF factor [Source:HGNC Symbol;Acc:HGNC:16841]	protein_coding	coding	11547722	11636381	16	-1	chromosome
ENSG00000261088	21.8019	0.181704	0.0687666	3.68147	0.00023189	0.0242394	NA	NA	NA	NA	NA	NA	NA	NA	NA
ENSG00000153936	2629.94	-0.228431	0.0622909	-3.66653	0.000245863	0.0253221	HS2ST1	heparan sulfate 2-O-sulfotransferase 1 [Source:HGNC Symbol;Acc:HGNC:5193]	protein_coding	coding	86914648	87109998	1	1	chromosome
ENSG00000227097	716.512	-0.401232	0.109318	-3.6675	0.000244936	0.0253221	RPS28P7	ribosomal protein S28 pseudogene 7 [Source:HGNC Symbol;Acc:HGNC:35787]	processed_pseudogene	pseudo	82689559	82689768	11	1	chromosome
ENSG00000168439	3088.42	0.294571	0.0804054	3.66451	0.000247817	0.025337	STIP1	stress induced phosphoprotein 1 [Source:HGNC Symbol;Acc:HGNC:11387]	protein_coding	coding	64185272	64204543	11	1	chromosome
ENSG00000271425	256.446	-0.443252	0.121159	-3.64887	0.000263394	0.0267345	NBPF10	NBPF member 10 [Source:HGNC Symbol;Acc:HGNC:31992]	protein_coding	coding	146064699	146144804	1	-1	chromosome
ENSG00000088812	2190.31	-0.248779	0.0685425	-3.6289	0.000284629	0.0281215	ATRN	attractin [Source:HGNC Symbol;Acc:HGNC:885]	protein_coding	coding	3471040	3651122	20	1	chromosome
ENSG00000145495	1301.43	-0.266165	0.0732946	-3.63052	0.000282854	0.0281215	MARCH6	membrane associated ring-CH-type finger 6 [Source:HGNC Symbol;Acc:HGNC:30550]	protein_coding	coding	10353703	10440388	5	1	chromosome
ENSG00000186432	759.447	-0.337214	0.0928327	-3.63157	0.000281706	0.0281215	KPNA4	karyopherin subunit alpha 4 [Source:HGNC Symbol;Acc:HGNC:6397]	protein_coding	coding	160494995	160565588	3	-1	chromosome
ENSG00000279950	2403.01	-0.256107	0.0705611	-3.62848	0.00028509	0.0281215	NA	NA	NA	NA	NA	NA	NA	NA	NA
ENSG00000124226	1398.94	-0.319091	0.0879878	-3.62399	0.000290098	0.0283053	RNF114	ring finger protein 114 [Source:HGNC Symbol;Acc:HGNC:13094]	protein_coding	coding	49936336	49953892	20	1	chromosome
ENSG00000224837	289.629	0.496952	0.137246	3.62319	0.000290994	0.0283053	GCSHP5	glycine cleavage system protein H pseudogene 5 [Source:HGNC Symbol;Acc:HGNC:44195]	processed_pseudogene	pseudo	168055901	168056422	1	-1	chromosome
ENSG00000060237	1567.53	-0.335253	0.0929718	-3.60609	0.000310846	0.0300277	WNK1	WNK lysine deficient protein kinase 1 [Source:HGNC Symbol;Acc:HGNC:14540]	protein_coding	coding	752593	911452	12	1	chromosome
ENSG00000106245	475.853	0.402822	0.112617	3.57997	0.000343635	0.0329678	BUD31	BUD31 homolog [Source:HGNC Symbol;Acc:HGNC:29629]	protein_coding	coding	99408641	99419616	7	1	chromosome
ENSG00000142534	7243.27	-0.221101	0.0618469	-3.57465	0.000350702	0.0330004	RPS11	ribosomal protein S11 [Source:HGNC Symbol;Acc:HGNC:10384]	protein_coding	coding	49496365	49499689	19	1	chromosome
ENSG00000169085	10.9499	0.232935	0.077387	3.57439	0.000351043	0.0330004	C8orf46	chromosome 8 open reading frame 46 [Source:HGNC Symbol;Acc:HGNC:28498]	protein_coding	coding	66460003	66518524	8	1	chromosome
ENSG00000196531	7502.33	0.248395	0.0694768	3.57525	0.000349889	0.0330004	NACA	nascent polypeptide-associated complex alpha subunit [Source:HGNC Symbol;Acc:HGNC:7629]	protein_coding	coding	56712428	56731628	12	-1	chromosome
ENSG00000005108	10.6035	-0.116337	0.054735	-3.56682	0.000361339	0.0337419	THSD7A	thrombospondin type 1 domain containing 7A [Source:HGNC Symbol;Acc:HGNC:22207]	protein_coding	coding	11370357	11832198	7	-1	chromosome
ENSG00000166377	221.73	0.461906	0.130263	3.55754	0.000374345	0.0344964	ATP9B	ATPase phospholipid transporting 9B (putative) [Source:HGNC Symbol;Acc:HGNC:13541]	protein_coding	coding	79069285	79378283	18	1	chromosome
ENSG00000177700	699.139	-0.319659	0.0897191	-3.55925	0.000371921	0.0344964	POLR2L	RNA polymerase II subunit L [Source:HGNC Symbol;Acc:HGNC:9199]	protein_coding	coding	837356	842545	11	-1	chromosome
ENSG00000100888	1428.26	-0.33466	0.0943907	-3.54601	0.000391105	0.0350069	CHD8	chromodomain helicase DNA binding protein 8 [Source:HGNC Symbol;Acc:HGNC:20153]	protein_coding	coding	21385194	21456126	14	-1	chromosome
ENSG00000113810	2090.72	0.411403	0.115986	3.54939	0.000386127	0.0350069	SMC4	structural maintenance of chromosomes 4 [Source:HGNC Symbol;Acc:HGNC:14013]	protein_coding	coding	160399274	160434962	3	1	chromosome
ENSG00000135926	1559.02	-0.284074	0.0799746	-3.55037	0.000384685	0.0350069	TMBIM1	transmembrane BAX inhibitor motif containing 1 [Source:HGNC Symbol;Acc:HGNC:23410]	protein_coding	coding	218274192	218292586	2	-1	chromosome
ENSG00000172081	148.705	0.488151	0.138303	3.54516	0.000392381	0.0350069	MOB3A	MOB kinase activator 3A [Source:HGNC Symbol;Acc:HGNC:29802]	protein_coding	coding	2071038	2096673	19	-1	chromosome
ENSG00000177189	8854.37	-0.222363	0.0627152	-3.54559	0.000391737	0.0350069	RPS6KA3	ribosomal protein S6 kinase A3 [Source:HGNC Symbol;Acc:HGNC:10432]	protein_coding	coding	20149911	20267100	X	-1	chromosome
ENSG00000173598	2861.72	0.193414	0.0547728	3.53144	0.000413296	0.0366395	NUDT4	nudix hydrolase 4 [Source:HGNC Symbol;Acc:HGNC:8051]	protein_coding	coding	93377883	93408146	12	1	chromosome
ENSG00000182944	3193.92	-0.19302	0.0547734	-3.52353	0.000425836	0.0375138	EWSR1	EWS RNA binding protein 1 [Source:HGNC Symbol;Acc:HGNC:3508]	protein_coding	coding	29268009	29300525	22	1	chromosome
ENSG00000089157	18248.2	-0.230444	0.0654558	-3.52042	0.000430861	0.0377192	RPLP0	ribosomal protein lateral stalk subunit P0 [Source:HGNC Symbol;Acc:HGNC:10371]	protein_coding	coding	120196686	120201235	12	-1	chromosome
ENSG00000125753	775.923	0.355983	0.101355	3.51243	0.000444026	0.0386302	VASP	vasodilator stimulated phosphoprotein [Source:HGNC Symbol;Acc:HGNC:12652]	protein_coding	coding	45506579	45526983	19	1	chromosome
ENSG00000131174	1098.3	-0.341233	0.0971761	-3.51052	0.000447231	0.0386689	COX7B	cytochrome c oxidase subunit 7B [Source:HGNC Symbol;Acc:HGNC:2291]	protein_coding	coding	77899438	77907373	X	1	chromosome
ENSG00000142609	64.5565	0.35532	0.109621	3.50317	0.000459757	0.0395081	CFAP74	cilia and flagella associated protein 74 [Source:HGNC Symbol;Acc:HGNC:29368]	protein_coding	coding	1921951	2003837	1	-1	chromosome
ENSG00000125817	563.28	-0.358155	0.1024	-3.49545	0.000473266	0.040176	CENPB	centromere protein B [Source:HGNC Symbol;Acc:HGNC:1852]	protein_coding	coding	3783851	3786690	20	-1	chromosome
ENSG00000144674	2486.99	0.211839	0.0605955	3.49619	0.000471961	0.040176	GOLGA4	golgin A4 [Source:HGNC Symbol;Acc:HGNC:4427]	protein_coding	coding	37243177	37366751	3	1	chromosome
ENSG00000213799	129.981	-0.478301	0.136645	-3.49018	0.000482698	0.0407298	ZNF845	zinc finger protein 845 [Source:HGNC Symbol;Acc:HGNC:25112]	protein_coding	coding	53333749	53354869	19	1	chromosome
ENSG00000108518	5166.69	-0.335488	0.0963571	-3.48129	0.000499008	0.041854	PFN1	profilin 1 [Source:HGNC Symbol;Acc:HGNC:8881]	protein_coding	coding	4945652	4949061	17	-1	chromosome
ENSG00000163682	3426.84	0.266834	0.0767041	3.47885	0.000503574	0.0419854	RPL9	ribosomal protein L9 [Source:HGNC Symbol;Acc:HGNC:10369]	protein_coding	coding	39454124	39458948	4	-1	chromosome
ENSG00000143815	1964.58	0.273241	0.0786606	3.47452	0.000511761	0.0423404	LBR	lamin B receptor [Source:HGNC Symbol;Acc:HGNC:6518]	protein_coding	coding	225401502	225428925	1	-1	chromosome
ENSG00000197381	250.083	-0.459378	0.131893	-3.47342	0.000513876	0.0423404	ADARB1	adenosine deaminase, RNA specific B1 [Source:HGNC Symbol;Acc:HGNC:226]	protein_coding	coding	45073853	45226560	21	1	chromosome
ENSG00000162714	345.37	-0.398213	0.114394	-3.47149	0.00051758	0.0423962	ZNF496	zinc finger protein 496 [Source:HGNC Symbol;Acc:HGNC:23713]	protein_coding	coding	247297412	247331846	1	-1	chromosome
ENSG00000106692	304.257	-0.467002	0.134645	-3.45755	0.000545107	0.0443914	FKTN	fukutin [Source:HGNC Symbol;Acc:HGNC:3622]	protein_coding	coding	105558130	105641118	9	1	chromosome
ENSG00000176142	659.101	-0.369014	0.10682	-3.45339	0.000553598	0.0448223	TMEM39A	transmembrane protein 39A [Source:HGNC Symbol;Acc:HGNC:25600]	protein_coding	coding	119429500	119468830	3	-1	chromosome
ENSG00000143933	9348.66	-0.173951	0.050422	-3.44972	0.000561175	0.0451746	CALM2	calmodulin 2 [Source:HGNC Symbol;Acc:HGNC:1445]	protein_coding	coding	47160082	47176601	2	-1	chromosome
ENSG00000210196	1176.39	-0.302557	0.0877315	-3.44788	0.000564997	0.0452224	MT-TP	mitochondrially encoded tRNA proline [Source:HGNC Symbol;Acc:HGNC:7494]	Mt_tRNA	mito	15956	16023	MT	-1	chromosome
ENSG00000102225	920.571	-0.361603	0.104976	-3.44182	0.000577813	0.0454549	CDK16	cyclin dependent kinase 16 [Source:HGNC Symbol;Acc:HGNC:8749]	protein_coding	coding	47217860	47229997	X	1	chromosome
ENSG00000105379	3735.14	-0.279283	0.081111	-3.44219	0.000577015	0.0454549	ETFB	electron transfer flavoprotein beta subunit [Source:HGNC Symbol;Acc:HGNC:3482]	protein_coding	coding	51345169	51366418	19	-1	chromosome
ENSG00000113387	4137.35	0.286311	0.0833273	3.43592	0.000590536	0.0454549	SUB1	SUB1 homolog, transcriptional regulator [Source:HGNC Symbol;Acc:HGNC:19985]	protein_coding	coding	32531633	32604079	5	1	chromosome
ENSG00000124126	18.7938	0.118908	0.0555298	3.43846	0.000585031	0.0454549	PREX1	phosphatidylinositol-3,4,5-trisphosphate dependent Rac exchange factor 1 [Source:HGNC Symbol;Acc:HGNC:32594]	protein_coding	coding	48624252	48827883	20	-1	chromosome
ENSG00000136942	4044.83	0.216042	0.0628519	3.43728	0.000587578	0.0454549	RPL35	ribosomal protein L35 [Source:HGNC Symbol;Acc:HGNC:10344]	protein_coding	coding	124857880	124861981	9	-1	chromosome
ENSG00000147471	559.992	-0.401096	0.116352	-3.44177	0.000577922	0.0454549	PLPBP	pyridoxal phosphate binding protein [Source:HGNC Symbol;Acc:HGNC:9457]	protein_coding	coding	37762593	37779767	8	1	chromosome
ENSG00000157193	318.572	-0.414332	0.120337	-3.43589	0.000590619	0.0454549	LRP8	LDL receptor related protein 8 [Source:HGNC Symbol;Acc:HGNC:6700]	protein_coding	coding	53242364	53328070	1	-1	chromosome
ENSG00000075624	16663	-0.201265	0.0587	-3.42858	0.000606744	0.0464408	ACTB	actin beta [Source:HGNC Symbol;Acc:HGNC:132]	protein_coding	coding	5527151	5563784	7	-1	chromosome
ENSG00000104960	538.687	-0.328221	0.0958511	-3.42002	0.000626175	0.0476676	PTOV1	prostate tumor overexpressed 1 [Source:HGNC Symbol;Acc:HGNC:9632]	protein_coding	coding	49850735	49860744	19	1	chromosome
ENSG00000112312	1285.49	0.257517	0.0753694	3.41774	0.000631423	0.0478073	GMNN	geminin, DNA replication inhibitor [Source:HGNC Symbol;Acc:HGNC:17493]	protein_coding	coding	24774931	24786099	6	1	chromosome
ENSG00000163738	229.627	0.447569	0.131661	3.41068	0.000648002	0.0487987	MTHFD2L	methylenetetrahydrofolate dehydrogenase (NADP+ dependent) 2 like [Source:HGNC Symbol;Acc:HGNC:31865]	protein_coding	coding	74114174	74303099	4	1	chromosome
ENSG00000107625	465.282	0.387454	0.113785	3.40468	0.000662426	0.0496182	DDX50	DExD-box helicase 50 [Source:HGNC Symbol;Acc:HGNC:17906]	protein_coding	coding	68901278	68946847	10	1	chromosome
ENSG00000128829	1620.94	0.253354	0.0745167	3.40088	0.000671696	0.0497801	EIF2AK4	eukaryotic translation initiation factor 2 alpha kinase 4 [Source:HGNC Symbol;Acc:HGNC:19687]	protein_coding	coding	39934146	40035591	15	1	chromosome
ENSG00000205060	521.136	-0.378059	0.111035	-3.40192	0.000669132	0.0497801	SLC35B4	solute carrier family 35 member B4 [Source:HGNC Symbol;Acc:HGNC:20584]	protein_coding	coding	134289332	134317051	7	-1	chromosome
ENSG00000104341	2212.92	-0.264051	0.077872	-3.39026	0.000698252	0.0514759	LAPTM4B	lysosomal protein transmembrane 4 beta [Source:HGNC Symbol;Acc:HGNC:13646]	protein_coding	coding	97775057	97853013	8	1	chromosome
ENSG00000177374	108.211	0.085495	0.0476503	3.38824	0.000703429	0.051586	HIC1	HIC ZBTB transcriptional repressor 1 [Source:HGNC Symbol;Acc:HGNC:4909]	protein_coding	coding	2054154	2063241	17	1	chromosome
ENSG00000084774	762.51	-0.348718	0.103137	-3.37622	0.000734891	0.0534336	CAD	carbamoyl-phosphate synthetase 2, aspartate transcarbamylase, and dihydroorotase [Source:HGNC Symbol;Acc:HGNC:1424]	protein_coding	coding	27217390	27243943	2	1	chromosome
ENSG00000178127	1633.29	0.23867	0.0707161	3.37571	0.000736252	0.0534336	NDUFV2	NADH:ubiquinone oxidoreductase core subunit V2 [Source:HGNC Symbol;Acc:HGNC:7717]	protein_coding	coding	9102630	9134345	18	1	chromosome
ENSG00000112578	422.343	-0.390644	0.115952	-3.36215	0.00077338	0.0555525	BYSL	bystin like [Source:HGNC Symbol;Acc:HGNC:1157]	protein_coding	coding	41921188	41933046	6	1	chromosome
ENSG00000168268	1902.23	-0.247745	0.0736517	-3.36348	0.000769661	0.0555525	NT5DC2	5'-nucleotidase domain containing 2 [Source:HGNC Symbol;Acc:HGNC:25717]	protein_coding	coding	52524385	52535054	3	-1	chromosome
ENSG00000069275	4308.71	-0.361663	0.107674	-3.35857	0.00078346	0.055745	NUCKS1	nuclear casein kinase and cyclin dependent kinase substrate 1 [Source:HGNC Symbol;Acc:HGNC:29923]	protein_coding	coding	205712819	205750276	1	-1	chromosome
ENSG00000132967	196.804	0.467185	0.138987	3.35838	0.00078402	0.055745	HMGB1P5	high mobility group box 1 pseudogene 5 [Source:HGNC Symbol;Acc:HGNC:4997]	transcribed_processed_pseudogene	pseudo	22381819	22382929	3	1	chromosome
ENSG00000174928	156.458	0.462243	0.138827	3.34974	0.000808863	0.0571752	C3orf33	chromosome 3 open reading frame 33 [Source:HGNC Symbol;Acc:HGNC:26434]	protein_coding	coding	155762617	155806351	3	-1	chromosome
ENSG00000243147	774.462	0.346338	0.103475	3.34857	0.000812298	0.0571752	MRPL33	mitochondrial ribosomal protein L33 [Source:HGNC Symbol;Acc:HGNC:14487]	protein_coding	coding	27771717	27988087	2	1	chromosome
ENSG00000198547	15.1264	0.10764	0.0527001	3.34403	0.000825707	0.0575407	C20orf203	chromosome 20 open reading frame 203 [Source:HGNC Symbol;Acc:HGNC:26592]	lincRNA	noncoding	32631652	32673941	20	-1	chromosome
ENSG00000214160	452.789	-0.352105	0.105118	-3.34497	0.000822924	0.0575407	ALG3	ALG3, alpha-1,3- mannosyltransferase [Source:HGNC Symbol;Acc:HGNC:23056]	protein_coding	coding	184242301	184249548	3	-1	chromosome
ENSG00000125730	23576.6	-0.204194	0.0611535	-3.33906	0.000840617	0.0582897	C3	complement C3 [Source:HGNC Symbol;Acc:HGNC:1318]	protein_coding	coding	6677704	6730562	19	-1	chromosome
ENSG00000117395	940.449	0.276109	0.0827528	3.33734	0.000845846	0.0583634	EBNA1BP2	EBNA1 binding protein 2 [Source:HGNC Symbol;Acc:HGNC:15531]	protein_coding	coding	43164175	43270936	1	-1	chromosome
ENSG00000066294	23.4825	0.145336	0.0625848	3.33408	0.000855818	0.0585206	CD84	CD84 molecule [Source:HGNC Symbol;Acc:HGNC:1704]	protein_coding	coding	160541095	160579516	1	-1	chromosome
ENSG00000099622	1028.37	-0.336131	0.100711	-3.33385	0.000856529	0.0585206	CIRBP	cold inducible RNA binding protein [Source:HGNC Symbol;Acc:HGNC:1982]	protein_coding	coding	1259384	1274880	19	1	chromosome
ENSG00000152219	240.24	0.428584	0.128512	3.33116	0.000864836	0.0585206	ARL14EP	ADP ribosylation factor like GTPase 14 effector protein [Source:HGNC Symbol;Acc:HGNC:26798]	protein_coding	coding	30323051	30338227	11	1	chromosome
ENSG00000166263	484.394	0.458314	0.138021	3.3321	0.000861933	0.0585206	STXBP4	syntaxin binding protein 4 [Source:HGNC Symbol;Acc:HGNC:19694]	protein_coding	coding	54968727	55173632	17	1	chromosome
ENSG00000241468	1380.01	0.252087	0.0757774	3.32768	0.000875733	0.058973	ATP5J2	ATP synthase, H+ transporting, mitochondrial Fo complex subunit F2 [Source:HGNC Symbol;Acc:HGNC:848]	protein_coding	coding	99448475	99466331	7	-1	chromosome
ENSG00000055332	1070.58	0.328926	0.0989672	3.32467	0.000885228	0.0592425	EIF2AK2	eukaryotic translation initiation factor 2 alpha kinase 2 [Source:HGNC Symbol;Acc:HGNC:9437]	protein_coding	coding	37099210	37157065	2	-1	chromosome
ENSG00000150401	150.237	0.459029	0.138688	3.32374	0.000888193	0.0592425	DCUN1D2	defective in cullin neddylation 1 domain containing 2 [Source:HGNC Symbol;Acc:HGNC:20328]	protein_coding	coding	113455819	113490952	13	-1	chromosome
ENSG00000100591	2150.13	-0.279285	0.0844303	-3.30665	0.000944173	0.0622517	AHSA1	activator of HSP90 ATPase activity 1 [Source:HGNC Symbol;Acc:HGNC:1189]	protein_coding	coding	77457870	77469474	14	1	chromosome
ENSG00000170037	246.314	0.403477	0.122036	3.30592	0.000946643	0.0622517	CNTROB	centrobin, centriole duplication and spindle assembly protein [Source:HGNC Symbol;Acc:HGNC:29616]	protein_coding	coding	7932101	7949918	17	1	chromosome
ENSG00000197558	19.4064	-0.218836	0.0799834	-3.30716	0.000942466	0.0622517	SSPO	SCO-spondin [Source:HGNC Symbol;Acc:HGNC:21998]	protein_coding	coding	149776042	149833979	7	1	chromosome
ENSG00000101019	1044.96	-0.306314	0.0926172	-3.30459	0.000951158	0.0622564	UQCC1	ubiquinol-cytochrome c reductase complex assembly factor 1 [Source:HGNC Symbol;Acc:HGNC:15891]	protein_coding	coding	35302566	35412141	20	-1	chromosome
ENSG00000103035	2254.92	-0.227039	0.0688726	-3.29553	0.000982369	0.063611	PSMD7	proteasome 26S subunit, non-ATPase 7 [Source:HGNC Symbol;Acc:HGNC:9565]	protein_coding	coding	74296775	74306288	16	1	chromosome
ENSG00000108107	2849.69	-0.271534	0.082336	-3.29682	0.000977847	0.063611	RPL28	ribosomal protein L28 [Source:HGNC Symbol;Acc:HGNC:10330]	protein_coding	coding	55385345	55403250	19	1	chromosome
ENSG00000129422	1602.68	0.298018	0.0905006	3.29464	0.000985478	0.063611	MTUS1	microtubule associated scaffold protein 1 [Source:HGNC Symbol;Acc:HGNC:29789]	protein_coding	coding	17643795	17800917	8	-1	chromosome
ENSG00000188486	953.063	0.257114	0.078154	3.29077	0.000999143	0.0639714	H2AFX	H2A histone family member X [Source:HGNC Symbol;Acc:HGNC:4739]	protein_coding	coding	119093854	119095467	11	-1	chromosome
ENSG00000205609	264.018	-0.259461	0.0912476	-3.29047	0.0010002	0.0639714	EIF3CL	eukaryotic translation initiation factor 3 subunit C like [Source:HGNC Symbol;Acc:HGNC:26347]	protein_coding	coding	28379579	28403879	16	-1	chromosome
ENSG00000181409	100.097	0.455107	0.139357	3.28817	0.00100841	0.0640859	AATK	apoptosis associated tyrosine kinase [Source:HGNC Symbol;Acc:HGNC:21]	protein_coding	coding	81117295	81166077	17	-1	chromosome
ENSG00000198668	2211.19	-0.21318	0.0648326	-3.28741	0.00101114	0.0640859	CALM1	calmodulin 1 [Source:HGNC Symbol;Acc:HGNC:1442]	protein_coding	coding	90396502	90408261	14	1	chromosome
ENSG00000113389	12.4022	0.106164	0.0521646	3.28058	0.00103595	0.0647794	NPR3	natriuretic peptide receptor 3 [Source:HGNC Symbol;Acc:HGNC:7945]	protein_coding	coding	32689070	32791724	5	1	chromosome
ENSG00000146373	43.1979	-0.383358	0.119755	-3.28081	0.00103509	0.0647794	RNF217	ring finger protein 217 [Source:HGNC Symbol;Acc:HGNC:21487]	protein_coding	coding	124962545	125092633	6	1	chromosome
ENSG00000198920	231.916	0.401372	0.12256	3.28086	0.00103493	0.0647794	KIAA0753	KIAA0753 [Source:HGNC Symbol;Acc:HGNC:29110]	protein_coding	coding	6578148	6640927	17	-1	chromosome
ENSG00000188321	96.5752	0.405589	0.127407	3.27451	0.00105845	0.065892	ZNF559	zinc finger protein 559 [Source:HGNC Symbol;Acc:HGNC:28197]	protein_coding	coding	9323772	9351162	19	1	chromosome
ENSG00000167658	18653.1	-0.152807	0.0467354	-3.26959	0.00107704	0.0667528	EEF2	eukaryotic translation elongation factor 2 [Source:HGNC Symbol;Acc:HGNC:3214]	protein_coding	coding	3976056	3985469	19	-1	chromosome
ENSG00000097021	681.7	-0.349055	0.106681	-3.26657	0.0010886	0.0668235	ACOT7	acyl-CoA thioesterase 7 [Source:HGNC Symbol;Acc:HGNC:24157]	protein_coding	coding	6264269	6394391	1	-1	chromosome
ENSG00000125818	1606.58	-0.222995	0.0682445	-3.26654	0.0010887	0.0668235	PSMF1	proteasome inhibitor subunit 1 [Source:HGNC Symbol;Acc:HGNC:9571]	protein_coding	coding	1113263	1189415	20	1	chromosome
ENSG00000179222	3321.29	0.177665	0.0544092	3.26556	0.00109249	0.0668235	MAGED1	MAGE family member D1 [Source:HGNC Symbol;Acc:HGNC:6813]	protein_coding	coding	51803007	51902357	X	1	chromosome
ENSG00000055483	788.716	-0.301827	0.0928725	-3.24898	0.00115818	0.0693275	USP36	ubiquitin specific peptidase 36 [Source:HGNC Symbol;Acc:HGNC:20062]	protein_coding	coding	78787381	78841441	17	-1	chromosome
ENSG00000092020	698.873	0.324075	0.0997682	3.24953	0.00115597	0.0693275	PPP2R3C	protein phosphatase 2 regulatory subunit B''gamma [Source:HGNC Symbol;Acc:HGNC:17485]	protein_coding	coding	35085467	35122517	14	-1	chromosome
ENSG00000132432	1140.87	0.290684	0.0894414	3.25085	0.00115062	0.0693275	SEC61G	Sec61 translocon gamma subunit [Source:HGNC Symbol;Acc:HGNC:18277]	protein_coding	coding	54752250	54759974	7	-1	chromosome
ENSG00000139842	1399.58	0.252053	0.0775541	3.25101	0.00114996	0.0693275	CUL4A	cullin 4A [Source:HGNC Symbol;Acc:HGNC:2554]	protein_coding	coding	113208193	113267108	13	1	chromosome
ENSG00000196700	1195.63	-0.244858	0.0752523	-3.25305	0.00114175	0.0693275	ZNF512B	zinc finger protein 512B [Source:HGNC Symbol;Acc:HGNC:29212]	protein_coding	coding	63956702	63969865	20	-1	chromosome
ENSG00000011021	536.615	-0.368078	0.113344	-3.24647	0.00116848	0.0696462	CLCN6	chloride voltage-gated channel 6 [Source:HGNC Symbol;Acc:HGNC:2024]	protein_coding	coding	11806096	11843144	1	1	chromosome
ENSG00000143368	445.02	-0.371961	0.114377	-3.24416	0.00117799	0.0699156	SF3B4	splicing factor 3b subunit 4 [Source:HGNC Symbol;Acc:HGNC:10771]	protein_coding	coding	149923317	149928344	1	-1	chromosome
ENSG00000160075	1034.21	0.248934	0.0769506	3.23565	0.00121366	0.0717289	SSU72	SSU72 homolog, RNA polymerase II CTD phosphatase [Source:HGNC Symbol;Acc:HGNC:25016]	protein_coding	coding	1541673	1574869	1	-1	chromosome
ENSG00000168952	386.309	0.425724	0.131454	3.23435	0.00121919	0.0717526	STXBP6	syntaxin binding protein 6 [Source:HGNC Symbol;Acc:HGNC:19666]	protein_coding	coding	24809656	25050297	14	-1	chromosome
ENSG00000164308	486.043	0.407192	0.126219	3.2329	0.00122542	0.0718176	ERAP2	endoplasmic reticulum aminopeptidase 2 [Source:HGNC Symbol;Acc:HGNC:29499]	protein_coding	coding	96875939	96919716	5	1	chromosome
ENSG00000113649	1350.67	0.229855	0.071175	3.23021	0.00123698	0.072193	TCERG1	transcription elongation regulator 1 [Source:HGNC Symbol;Acc:HGNC:15630]	protein_coding	coding	146447311	146511961	5	1	chromosome
ENSG00000168958	1458.75	0.232599	0.0721137	3.22606	0.00125509	0.0729462	MFF	mitochondrial fission factor [Source:HGNC Symbol;Acc:HGNC:24858]	protein_coding	coding	227325151	227357836	2	1	chromosome
ENSG00000135643	36.4642	0.365719	0.118034	3.22227	0.00127181	0.0736123	KCNMB4	potassium calcium-activated channel subfamily M regulatory beta subunit 4 [Source:HGNC Symbol;Acc:HGNC:6289]	protein_coding	coding	70366276	70434292	12	1	chromosome
ENSG00000168172	665.788	0.434202	0.135201	3.22032	0.00128048	0.0738094	HOOK3	hook microtubule tethering protein 3 [Source:HGNC Symbol;Acc:HGNC:23576]	protein_coding	coding	42896932	43030539	8	1	chromosome
ENSG00000108771	37.2033	0.408358	0.128255	3.21818	0.00129006	0.0740571	DHX58	DExH-box helicase 58 [Source:HGNC Symbol;Acc:HGNC:29517]	protein_coding	coding	42101404	42112733	17	-1	chromosome
ENSG00000136888	1344.53	0.252245	0.0784838	3.21385	0.00130967	0.0748757	ATP6V1G1	ATPase H+ transporting V1 subunit G1 [Source:HGNC Symbol;Acc:HGNC:864]	protein_coding	coding	114587746	114598373	9	1	chromosome
ENSG00000074416	17.0616	0.108592	0.0534607	3.21267	0.00131507	0.0748786	MGLL	monoglyceride lipase [Source:HGNC Symbol;Acc:HGNC:17038]	protein_coding	coding	127689062	127823250	3	-1	chromosome
ENSG00000085644	42.7751	-0.403184	0.128338	-3.20305	0.00135979	0.0771119	ZNF213	zinc finger protein 213 [Source:HGNC Symbol;Acc:HGNC:13005]	protein_coding	coding	3129777	3142805	16	1	chromosome
ENSG00000103089	14.0764	0.104506	0.0523497	3.18766	0.00143427	0.0801237	FA2H	fatty acid 2-hydroxylase [Source:HGNC Symbol;Acc:HGNC:21197]	protein_coding	coding	74712955	74774831	16	-1	chromosome
ENSG00000116044	2776.04	0.179957	0.056514	3.18458	0.00144962	0.0801237	NFE2L2	nuclear factor, erythroid 2 like 2 [Source:HGNC Symbol;Acc:HGNC:7782]	protein_coding	coding	177227595	177392697	2	-1	chromosome
ENSG00000132613	2676.16	-0.210889	0.0661553	-3.18771	0.00143405	0.0801237	MTSS1L	MTSS1L, I-BAR domain containing [Source:HGNC Symbol;Acc:HGNC:25094]	protein_coding	coding	70661204	70686066	16	-1	chromosome
ENSG00000167528	180.8	0.399241	0.128607	3.18392	0.00145295	0.0801237	ZNF641	zinc finger protein 641 [Source:HGNC Symbol;Acc:HGNC:31834]	protein_coding	coding	48337180	48351414	12	-1	chromosome
ENSG00000179195	2370.82	0.185889	0.0583358	3.18674	0.00143887	0.0801237	ZNF664	zinc finger protein 664 [Source:HGNC Symbol;Acc:HGNC:25406]	protein_coding	coding	123971845	124015439	12	1	chromosome
ENSG00000189334	24.6446	0.314046	0.104194	3.18776	0.0014338	0.0801237	S100A14	S100 calcium binding protein A14 [Source:HGNC Symbol;Acc:HGNC:18901]	protein_coding	coding	153614255	153616986	1	-1	chromosome
ENSG00000198034	7751.39	-0.160224	0.0502957	-3.18555	0.00144477	0.0801237	RPS4X	ribosomal protein S4, X-linked [Source:HGNC Symbol;Acc:HGNC:10424]	protein_coding	coding	72255679	72277300	X	-1	chromosome
ENSG00000035928	1813.52	0.360603	0.113582	3.17729	0.00148657	0.0816563	RFC1	replication factor C subunit 1 [Source:HGNC Symbol;Acc:HGNC:9969]	protein_coding	coding	39287456	39366375	4	-1	chromosome
ENSG00000055070	1213.8	-0.254925	0.0803461	-3.17205	0.00151367	0.0824981	SZRD1	SUZ RNA binding domain containing 1 [Source:HGNC Symbol;Acc:HGNC:30232]	protein_coding	coding	16352575	16398145	1	1	chromosome
ENSG00000182050	275.898	0.0554468	0.0383885	3.17307	0.00150835	0.0824981	MGAT4C	MGAT4 family member C [Source:HGNC Symbol;Acc:HGNC:30871]	protein_coding	coding	85955666	86838904	12	-1	chromosome
ENSG00000159792	397.191	-0.375119	0.118182	-3.16577	0.00154675	0.0836836	PSKH1	protein serine kinase H1 [Source:HGNC Symbol;Acc:HGNC:9529]	protein_coding	coding	67893272	67929678	16	1	chromosome
ENSG00000241343	3289.19	-0.198749	0.0627762	-3.16565	0.00154737	0.0836836	RPL36A	ribosomal protein L36a [Source:HGNC Symbol;Acc:HGNC:10359]	protein_coding	coding	101390824	101396154	X	1	chromosome
ENSG00000105223	440.126	-0.362257	0.114347	-3.16049	0.00157503	0.0843106	PLD3	phospholipase D family member 3 [Source:HGNC Symbol;Acc:HGNC:17158]	protein_coding	coding	40348456	40380439	19	1	chromosome
ENSG00000115091	3373.16	-0.185101	0.0585649	-3.16012	0.00157702	0.0843106	ACTR3	ARP3 actin related protein 3 homolog [Source:HGNC Symbol;Acc:HGNC:170]	protein_coding	coding	113889960	113962596	2	1	chromosome
ENSG00000137801	2361.85	-0.211175	0.0667802	-3.16205	0.00156661	0.0843106	THBS1	thrombospondin 1 [Source:HGNC Symbol;Acc:HGNC:11785]	protein_coding	coding	39581079	39599466	15	1	chromosome
ENSG00000142949	2455.77	-0.227421	0.0721292	-3.1525	0.00161879	0.0862142	PTPRF	protein tyrosine phosphatase, receptor type F [Source:HGNC Symbol;Acc:HGNC:9670]	protein_coding	coding	43525187	43623666	1	1	chromosome
ENSG00000100297	960.08	-0.298385	0.0949404	-3.14068	0.00168555	0.0884203	MCM5	minichromosome maintenance complex component 5 [Source:HGNC Symbol;Acc:HGNC:6948]	protein_coding	coding	35400063	35425430	22	1	chromosome
ENSG00000124406	217.093	0.390991	0.127715	3.14352	0.00166929	0.0884203	ATP8A1	ATPase phospholipid transporting 8A1 [Source:HGNC Symbol;Acc:HGNC:13531]	protein_coding	coding	42408373	42657105	4	-1	chromosome
ENSG00000127774	279.76	0.365501	0.116409	3.1396	0.00169177	0.0884203	EMC6	ER membrane protein complex subunit 6 [Source:HGNC Symbol;Acc:HGNC:28430]	protein_coding	coding	3668815	3669668	17	1	chromosome
ENSG00000166002	189.881	0.409323	0.130445	3.14116	0.00168281	0.0884203	SMCO4	single-pass membrane protein with coiled-coil domains 4 [Source:HGNC Symbol;Acc:HGNC:24810]	protein_coding	coding	93478472	93543508	11	-1	chromosome
ENSG00000254726	215.998	-0.424362	0.134477	-3.13967	0.00169141	0.0884203	MEX3A	mex-3 RNA binding family member A [Source:HGNC Symbol;Acc:HGNC:33482]	protein_coding	coding	156072013	156081998	1	-1	chromosome
ENSG00000101076	2254.82	-0.217924	0.0694245	-3.13819	0.00169993	0.0885165	HNF4A	hepatocyte nuclear factor 4 alpha [Source:HGNC Symbol;Acc:HGNC:5024]	protein_coding	coding	44355700	44434596	20	1	chromosome
ENSG00000169562	910.281	-0.248615	0.0792793	-3.13443	0.00172186	0.0893261	GJB1	gap junction protein beta 1 [Source:HGNC Symbol;Acc:HGNC:4283]	protein_coding	coding	71215194	71225516	X	1	chromosome
ENSG00000167513	420.182	-0.350801	0.111811	-3.13015	0.00174715	0.0903037	CDT1	chromatin licensing and DNA replication factor 1 [Source:HGNC Symbol;Acc:HGNC:24576]	protein_coding	coding	88803213	88809258	16	1	chromosome
ENSG00000076555	208.513	0.428817	0.137748	3.12847	0.00175718	0.0904884	ACACB	acetyl-CoA carboxylase beta [Source:HGNC Symbol;Acc:HGNC:85]	protein_coding	coding	109116595	109268226	12	1	chromosome
ENSG00000068724	671.026	-0.296257	0.0947101	-3.12548	0.00177517	0.0910801	TTC7A	tetratricopeptide repeat domain 7A [Source:HGNC Symbol;Acc:HGNC:19750]	protein_coding	coding	46916157	47076137	2	1	chromosome
ENSG00000258947	1832.6	-0.256228	0.0820144	-3.12411	0.00178344	0.0911705	TUBB3	tubulin beta 3 class III [Source:HGNC Symbol;Acc:HGNC:20772]	protein_coding	coding	89921392	89938761	16	1	chromosome
ENSG00000143494	48.0593	0.406968	0.132255	3.12238	0.00179397	0.0911803	VASH2	vasohibin 2 [Source:HGNC Symbol;Acc:HGNC:25723]	protein_coding	coding	212950520	212992037	1	1	chromosome
ENSG00000167522	1631.44	-0.237743	0.0761286	-3.12194	0.00179666	0.0911803	ANKRD11	ankyrin repeat domain 11 [Source:HGNC Symbol;Acc:HGNC:21316]	protein_coding	coding	89267627	89490561	16	-1	chromosome
ENSG00000149428	3493.81	-0.182614	0.058536	-3.11933	0.00181265	0.0916597	HYOU1	hypoxia up-regulated 1 [Source:HGNC Symbol;Acc:HGNC:16931]	protein_coding	coding	119044189	119057202	11	-1	chromosome
ENSG00000127328	401.223	0.364825	0.116951	3.11714	0.00182615	0.0920106	RAB3IP	RAB3A interacting protein [Source:HGNC Symbol;Acc:HGNC:16508]	protein_coding	coding	69738681	69823204	12	1	chromosome
ENSG00000197006	2016.14	0.270549	0.0870467	3.10789	0.00188426	0.094598	METTL9	methyltransferase like 9 [Source:HGNC Symbol;Acc:HGNC:24586]	protein_coding	coding	21597218	21657473	16	1	chromosome
ENSG00000111640	24589.3	-0.208571	0.0671919	-3.104	0.00190925	0.0955102	GAPDH	glyceraldehyde-3-phosphate dehydrogenase [Source:HGNC Symbol;Acc:HGNC:4141]	protein_coding	coding	6533927	6538374	12	1	chromosome
ENSG00000126107	355.104	-0.365872	0.117583	-3.10294	0.00191607	0.0955105	HECTD3	HECT domain E3 ubiquitin protein ligase 3 [Source:HGNC Symbol;Acc:HGNC:26117]	protein_coding	coding	45002540	45011329	1	-1	chromosome
ENSG00000124067	814.562	-0.324754	0.10458	-3.10141	0.00192603	0.0956665	SLC12A4	solute carrier family 12 member 4 [Source:HGNC Symbol;Acc:HGNC:10913]	protein_coding	coding	67943474	67969601	16	-1	chromosome
ENSG00000103335	1416.29	-0.285434	0.0922112	-3.09496	0.00196841	0.097426	PIEZO1	piezo type mechanosensitive ion channel component 1 [Source:HGNC Symbol;Acc:HGNC:28993]	protein_coding	coding	88715343	88785211	16	-1	chromosome
ENSG00000087087	1396.26	-0.285678	0.0923561	-3.09236	0.00198573	0.0977249	SRRT	serrate, RNA effector molecule [Source:HGNC Symbol;Acc:HGNC:24101]	protein_coding	coding	100875111	100888664	7	1	chromosome
ENSG00000151532	461.325	0.419576	0.136139	3.09184	0.00198918	0.0977249	VTI1A	vesicle transport through interaction with t-SNAREs 1A [Source:HGNC Symbol;Acc:HGNC:17792]	protein_coding	coding	112446998	112818744	10	1	chromosome
ENSG00000169045	9401.2	-0.146221	0.0473065	-3.09092	0.00199538	0.0977249	HNRNPH1	heterogeneous nuclear ribonucleoprotein H1 [Source:HGNC Symbol;Acc:HGNC:5041]	protein_coding	coding	179614178	179634784	5	-1	chromosome
ENSG00000037241	401.71	-0.353436	0.114159	-3.08835	0.0020127	0.0978885	RPL26L1	ribosomal protein L26 like 1 [Source:HGNC Symbol;Acc:HGNC:17050]	protein_coding	coding	172958729	172969771	5	1	chromosome
ENSG00000162337	1441.2	-0.242087	0.0783403	-3.08924	0.00200668	0.0978885	LRP5	LDL receptor related protein 5 [Source:HGNC Symbol;Acc:HGNC:6697]	protein_coding	coding	68312609	68449275	11	1	chromosome
ENSG00000091317	1411.44	0.241806	0.0784127	3.08447	0.00203913	0.0988306	CMTM6	CKLF like MARVEL transmembrane domain containing 6 [Source:HGNC Symbol;Acc:HGNC:19177]	protein_coding	coding	32481312	32503408	3	-1	chromosome
ENSG00000130958	1099.85	0.283264	0.0919447	3.08265	0.00205166	0.0990951	SLC35D2	solute carrier family 35 member D2 [Source:HGNC Symbol;Acc:HGNC:20799]	protein_coding	coding	96320706	96383710	9	-1	chromosome
ENSG00000101680	19.7051	0.218832	0.0823087	3.07978	0.00207154	0.09937	LAMA1	laminin subunit alpha 1 [Source:HGNC Symbol;Acc:HGNC:6481]	protein_coding	coding	6941744	7117814	18	-1	chromosome
ENSG00000120519	231.711	0.420715	0.137049	3.08002	0.0020699	0.09937	SLC10A7	solute carrier family 10 member 7 [Source:HGNC Symbol;Acc:HGNC:23088]	protein_coding	coding	146253975	146521964	4	-1	chromosome
ENSG00000104517	1508.78	0.319533	0.103777	3.07815	0.00208293	0.0995756	UBR5	ubiquitin protein ligase E3 component n-recognin 5 [Source:HGNC Symbol;Acc:HGNC:16806]	protein_coding	coding	102253012	102412841	8	-1	chromosome
ENSG00000033178	842.903	-0.360726	0.117243	-3.07297	0.00211943	0.100304	UBA6	ubiquitin like modifier activating enzyme 6 [Source:HGNC Symbol;Acc:HGNC:25581]	protein_coding	coding	67612652	67701179	4	-1	chromosome
ENSG00000070087	1560.41	-0.21444	0.0697703	-3.07293	0.00211965	0.100304	PFN2	profilin 2 [Source:HGNC Symbol;Acc:HGNC:8882]	protein_coding	coding	149964904	150050788	3	-1	chromosome
ENSG00000152104	320.495	0.424678	0.13878	3.07335	0.0021167	0.100304	PTPN14	protein tyrosine phosphatase, non-receptor type 14 [Source:HGNC Symbol;Acc:HGNC:9647]	protein_coding	coding	214348696	214552449	1	-1	chromosome
ENSG00000070756	8488.67	-0.154536	0.0503164	-3.07124	0.00213172	0.100535	PABPC1	poly(A) binding protein cytoplasmic 1 [Source:HGNC Symbol;Acc:HGNC:8554]	protein_coding	coding	100685816	100722809	8	-1	chromosome
ENSG00000170144	11976.5	-0.151882	0.049491	-3.06877	0.00214945	0.100693	HNRNPA3	heterogeneous nuclear ribonucleoprotein A3 [Source:HGNC Symbol;Acc:HGNC:24941]	protein_coding	coding	177212563	177223958	2	1	chromosome
ENSG00000181222	1740.78	-0.295163	0.0961875	-3.06934	0.00214529	0.100693	POLR2A	RNA polymerase II subunit A [Source:HGNC Symbol;Acc:HGNC:9187]	protein_coding	coding	7484366	7514616	17	1	chromosome
ENSG00000148688	416.918	0.335529	0.109581	3.06435	0.00218141	0.10185	RPP30	ribonuclease P/MRP subunit p30 [Source:HGNC Symbol;Acc:HGNC:17688]	protein_coding	coding	90871716	90908553	10	1	chromosome
ENSG00000072422	1434.29	0.279698	0.0915455	3.05548	0.00224697	0.103912	RHOBTB1	Rho related BTB domain containing 1 [Source:HGNC Symbol;Acc:HGNC:18738]	protein_coding	coding	60869438	61001440	10	-1	chromosome
ENSG00000095321	324.332	-0.366527	0.120013	-3.05408	0.00225755	0.103912	CRAT	carnitine O-acetyltransferase [Source:HGNC Symbol;Acc:HGNC:2342]	protein_coding	coding	129094810	129111189	9	-1	chromosome
ENSG00000126005	93.2844	0.42348	0.139435	3.05543	0.00224737	0.103912	MMP24-AS1	MMP24 antisense RNA 1 [Source:HGNC Symbol;Acc:HGNC:44421]	protein_coding	coding	35201745	35278131	20	-1	chromosome
ENSG00000134369	11.515	-0.227649	0.0847699	-3.05533	0.00224813	0.103912	NAV1	neuron navigator 1 [Source:HGNC Symbol;Acc:HGNC:15989]	protein_coding	coding	201622885	201826969	1	1	chromosome
ENSG00000247796	51.8405	0.400289	0.132157	3.0534	0.00226266	0.103912	AC008966.1	NA	antisense_RNA	other	53109842	53115126	5	1	chromosome
ENSG00000226380	21.5231	-0.289423	0.0994729	-3.05	0.00228843	0.104752	AC016831.1	NA	lincRNA	noncoding	130876809	130913310	7	-1	chromosome
ENSG00000108179	2644.24	-0.208301	0.0684418	-3.04329	0.00234005	0.106714	PPIF	peptidylprolyl isomerase F [Source:HGNC Symbol;Acc:HGNC:9259]	protein_coding	coding	79347469	79355337	10	1	chromosome
ENSG00000109756	522.373	-0.39216	0.129087	-3.04051	0.00236177	0.106714	RAPGEF2	Rap guanine nucleotide exchange factor 2 [Source:HGNC Symbol;Acc:HGNC:16854]	protein_coding	coding	159104178	159360169	4	1	chromosome
ENSG00000130726	2477.98	-0.223847	0.0735769	-3.04167	0.00235273	0.106714	TRIM28	tripartite motif containing 28 [Source:HGNC Symbol;Acc:HGNC:16384]	protein_coding	coding	58544091	58550722	19	1	chromosome
ENSG00000177576	299.074	0.374714	0.123222	3.04113	0.00235695	0.106714	C18orf32	chromosome 18 open reading frame 32 [Source:HGNC Symbol;Acc:HGNC:31690]	protein_coding	coding	49477250	49487252	18	-1	chromosome
ENSG00000110090	364.716	-0.341001	0.112242	-3.03453	0.00240911	0.108503	CPT1A	carnitine palmitoyltransferase 1A [Source:HGNC Symbol;Acc:HGNC:2328]	protein_coding	coding	68754620	68844410	11	-1	chromosome
ENSG00000124767	2644.67	0.221068	0.0729146	3.03201	0.00242932	0.109063	GLO1	glyoxalase I [Source:HGNC Symbol;Acc:HGNC:4323]	protein_coding	coding	38675925	38703141	6	-1	chromosome
ENSG00000102858	530.19	-0.335578	0.110808	-3.02444	0.0024909	0.110753	MGRN1	mahogunin ring finger 1 [Source:HGNC Symbol;Acc:HGNC:20254]	protein_coding	coding	4616493	4690974	16	1	chromosome
ENSG00000167900	1022.92	-0.228476	0.0755517	-3.02311	0.00250191	0.110753	TK1	thymidine kinase 1 [Source:HGNC Symbol;Acc:HGNC:11830]	protein_coding	coding	78174075	78187233	17	-1	chromosome
ENSG00000178814	286.998	-0.347356	0.114594	-3.0254	0.00248304	0.110753	OPLAH	5-oxoprolinase (ATP-hydrolysing) [Source:HGNC Symbol;Acc:HGNC:8149]	protein_coding	coding	144051266	144063965	8	-1	chromosome
ENSG00000184702	19.4505	0.183497	0.0740706	3.02442	0.00249112	0.110753	2018-09-05	septin 5 [Source:HGNC Symbol;Acc:HGNC:9164]	protein_coding	coding	19714464	19724772	22	1	chromosome
ENSG00000204628	11577	-0.184199	0.0609379	-3.02255	0.00250651	0.110753	RACK1	receptor for activated C kinase 1 [Source:HGNC Symbol;Acc:HGNC:4399]	protein_coding	coding	181236909	181248096	5	-1	chromosome
ENSG00000055609	633.207	0.323395	0.107179	3.02066	0.00252223	0.110809	KMT2C	lysine methyltransferase 2C [Source:HGNC Symbol;Acc:HGNC:13726]	protein_coding	coding	152134922	152436005	7	-1	chromosome
ENSG00000169020	1066.08	-0.276962	0.0916157	-3.0205	0.0025236	0.110809	ATP5I	ATP synthase, H+ transporting, mitochondrial Fo complex subunit E [Source:HGNC Symbol;Acc:HGNC:846]	protein_coding	coding	672436	674338	4	-1	chromosome
ENSG00000021645	10.4966	0.100284	0.0510158	3.01427	0.00257594	0.112099	NRXN3	neurexin 3 [Source:HGNC Symbol;Acc:HGNC:8010]	protein_coding	coding	78170373	79868290	14	1	chromosome
ENSG00000160087	442.116	0.317258	0.105329	3.01533	0.00256698	0.112099	UBE2J2	ubiquitin conjugating enzyme E2 J2 [Source:HGNC Symbol;Acc:HGNC:19268]	protein_coding	coding	1253909	1273885	1	-1	chromosome
ENSG00000166233	777.86	-0.312381	0.10354	-3.01415	0.00257698	0.112099	ARIH1	ariadne RBR E3 ubiquitin protein ligase 1 [Source:HGNC Symbol;Acc:HGNC:689]	protein_coding	coding	72474326	72602985	15	1	chromosome
ENSG00000133835	2796.59	0.212196	0.0705773	3.00683	0.00263989	0.11448	HSD17B4	hydroxysteroid 17-beta dehydrogenase 4 [Source:HGNC Symbol;Acc:HGNC:5213]	protein_coding	coding	119452443	119637199	5	1	chromosome
ENSG00000169710	6232.07	-0.258483	0.0860544	-3.0034	0.00266978	0.115419	FASN	fatty acid synthase [Source:HGNC Symbol;Acc:HGNC:3594]	protein_coding	coding	82078333	82098332	17	-1	chromosome
ENSG00000258057	20.7824	0.169601	0.0706547	3.00183	0.00268366	0.115661	BCDIN3D-AS1	BCDIN3D antisense RNA 1 [Source:HGNC Symbol;Acc:HGNC:44113]	antisense_RNA	other	49828542	49841143	12	1	chromosome
ENSG00000104549	3707.18	0.230401	0.0769594	2.99412	0.00275237	0.117897	SQLE	squalene epoxidase [Source:HGNC Symbol;Acc:HGNC:11279]	protein_coding	coding	124998497	125022283	8	1	chromosome
ENSG00000123066	609.003	0.316219	0.105665	2.99436	0.0027502	0.117897	MED13L	mediator complex subunit 13 like [Source:HGNC Symbol;Acc:HGNC:22962]	protein_coding	coding	115953872	116277338	12	-1	chromosome
ENSG00000170242	744.915	0.306535	0.10254	2.99245	0.00276747	0.118183	USP47	ubiquitin specific peptidase 47 [Source:HGNC Symbol;Acc:HGNC:20076]	protein_coding	coding	11841423	11959323	11	1	chromosome
ENSG00000117394	6722.48	-0.177837	0.0594612	-2.99063	0.00278403	0.118351	SLC2A1	solute carrier family 2 member 1 [Source:HGNC Symbol;Acc:HGNC:11005]	protein_coding	coding	42925375	42959173	1	-1	chromosome
ENSG00000157551	17.4869	0.12595	0.059195	2.99016	0.00278831	0.118351	KCNJ15	potassium voltage-gated channel subfamily J member 15 [Source:HGNC Symbol;Acc:HGNC:6261]	protein_coding	coding	38157034	38307357	21	1	chromosome
ENSG00000012504	703	0.271036	0.0908283	2.98477	0.00283789	0.118664	NR1H4	nuclear receptor subfamily 1 group H member 4 [Source:HGNC Symbol;Acc:HGNC:7967]	protein_coding	coding	100473708	100564413	12	1	chromosome
ENSG00000071894	1258.7	-0.302436	0.101237	-2.98611	0.00282553	0.118664	CPSF1	cleavage and polyadenylation specific factor 1 [Source:HGNC Symbol;Acc:HGNC:2324]	protein_coding	coding	144393229	144409349	8	-1	chromosome
ENSG00000135052	77.1736	0.411858	0.13901	2.98489	0.00283682	0.118664	GOLM1	golgi membrane protein 1 [Source:HGNC Symbol;Acc:HGNC:15451]	protein_coding	coding	86026146	86100173	9	-1	chromosome
ENSG00000198618	61.6756	0.280582	0.100643	2.98721	0.00281534	0.118664	PPIAP22	peptidylprolyl isomerase A pseudogene 22 [Source:HGNC Symbol;Acc:HGNC:17236]	processed_pseudogene	pseudo	18857779	18858276	21	1	chromosome
ENSG00000261807	13.2868	0.119545	0.0567185	2.98476	0.00283805	0.118664	LINC02141	long intergenic non-protein coding RNA 2141 [Source:HGNC Symbol;Acc:HGNC:53001]	lincRNA	noncoding	59855353	60053973	16	1	chromosome
ENSG00000151657	312.524	0.33452	0.112304	2.98224	0.00286145	0.119287	KIN	Kin17 DNA and RNA binding protein [Source:HGNC Symbol;Acc:HGNC:6327]	protein_coding	coding	7750962	7787981	10	-1	chromosome
ENSG00000244398	559.767	0.413739	0.139028	2.97955	0.00288673	0.119984	AC116533.1	NA	processed_pseudogene	pseudo	16974693	16975013	11	-1	chromosome
ENSG00000076554	583.66	0.33942	0.114253	2.97423	0.00293728	0.121723	TPD52	tumor protein D52 [Source:HGNC Symbol;Acc:HGNC:12005]	protein_coding	coding	80034745	80231232	8	-1	chromosome
ENSG00000110066	552.921	0.38214	0.128859	2.97201	0.00295858	0.12189	KMT5B	lysine methyltransferase 5B [Source:HGNC Symbol;Acc:HGNC:24283]	protein_coding	coding	68154863	68213828	11	-1	chromosome
ENSG00000115364	1601.93	0.229594	0.0772574	2.97182	0.0029604	0.12189	MRPL19	mitochondrial ribosomal protein L19 [Source:HGNC Symbol;Acc:HGNC:14052]	protein_coding	coding	75646783	75690851	2	1	chromosome
ENSG00000173166	325.769	0.410875	0.13919	2.97109	0.00296742	0.12189	RAPH1	Ras association (RalGDS/AF-6) and pleckstrin homology domains 1 [Source:HGNC Symbol;Acc:HGNC:14436]	protein_coding	coding	203394345	203535410	2	-1	chromosome
ENSG00000176986	1310.01	-0.226225	0.0761625	-2.96957	0.00298212	0.122136	SEC24C	SEC24 homolog C, COPII coat complex component [Source:HGNC Symbol;Acc:HGNC:10705]	protein_coding	coding	73744384	73772161	10	1	chromosome
ENSG00000105778	719.958	-0.316	0.106575	-2.96064	0.00307004	0.124447	AVL9	AVL9 cell migration associated [Source:HGNC Symbol;Acc:HGNC:28994]	protein_coding	coding	32495426	32588721	7	1	chromosome
ENSG00000112081	4566.14	-0.164553	0.0555978	-2.95951	0.00308125	0.124447	SRSF3	serine and arginine rich splicing factor 3 [Source:HGNC Symbol;Acc:HGNC:10785]	protein_coding	coding	36594353	36605600	6	1	chromosome
ENSG00000115541	6015.24	-0.165895	0.0560547	-2.95934	0.00308297	0.124447	HSPE1	heat shock protein family E (Hsp10) member 1 [Source:HGNC Symbol;Acc:HGNC:5269]	protein_coding	coding	197499994	197503457	2	1	chromosome
ENSG00000127838	564.912	-0.288468	0.0973804	-2.96042	0.00307222	0.124447	PNKD	paroxysmal nonkinesigenic dyskinesia [Source:HGNC Symbol;Acc:HGNC:9153]	protein_coding	coding	218270392	218346793	2	1	chromosome
ENSG00000244462	1872.45	-0.217899	0.0736012	-2.96033	0.00307306	0.124447	RBM12	RNA binding motif protein 12 [Source:HGNC Symbol;Acc:HGNC:9898]	protein_coding	coding	35648925	35664956	20	-1	chromosome
ENSG00000125744	98.8634	0.359796	0.124844	2.95819	0.00309454	0.124555	RTN2	reticulon 2 [Source:HGNC Symbol;Acc:HGNC:10468]	protein_coding	coding	45485289	45497061	19	-1	chromosome
ENSG00000100811	1349.87	0.229941	0.0778229	2.95455	0.00313129	0.125314	YY1	YY1 transcription factor [Source:HGNC Symbol;Acc:HGNC:12856]	protein_coding	coding	100238298	100282792	14	1	chromosome
ENSG00000163743	361.829	-0.355195	0.119989	-2.95533	0.00312331	0.125314	RCHY1	ring finger and CHY zinc finger domain containing 1 [Source:HGNC Symbol;Acc:HGNC:17479]	protein_coding	coding	75479037	75514764	4	-1	chromosome
ENSG00000196233	637.126	0.384606	0.130234	2.95361	0.00314079	0.125336	LCOR	ligand dependent nuclear receptor corepressor [Source:HGNC Symbol;Acc:HGNC:29503]	protein_coding	coding	96832282	96995959	10	1	chromosome
ENSG00000136485	1753.91	-0.215961	0.0731635	-2.95148	0.00316253	0.125489	DCAF7	DDB1 and CUL4 associated factor 7 [Source:HGNC Symbol;Acc:HGNC:30915]	protein_coding	coding	63550461	63594266	17	1	chromosome
ENSG00000234851	5155.77	-0.218257	0.0739301	-2.95179	0.00315939	0.125489	RPL23AP42	ribosomal protein L23a pseudogene 42 [Source:HGNC Symbol;Acc:HGNC:35942]	processed_pseudogene	pseudo	161429127	161429597	3	-1	chromosome
ENSG00000140279	10.5587	-0.0971545	0.0508808	-2.94259	0.00325479	0.128785	DUOX2	dual oxidase 2 [Source:HGNC Symbol;Acc:HGNC:13273]	protein_coding	coding	45092650	45114344	15	-1	chromosome
ENSG00000226268	266.441	0.383078	0.13033	2.94087	0.00327296	0.129139	AC135977.1	NA	processed_pseudogene	pseudo	49433480	49434438	11	-1	chromosome
ENSG00000131504	1775.19	0.23137	0.0787052	2.93976	0.0032847	0.129238	DIAPH1	diaphanous related formin 1 [Source:HGNC Symbol;Acc:HGNC:2876]	protein_coding	coding	141515016	141619055	5	-1	chromosome
ENSG00000109819	432.679	0.40643	0.139383	2.93194	0.00336856	0.132166	PPARGC1A	PPARG coactivator 1 alpha [Source:HGNC Symbol;Acc:HGNC:9237]	protein_coding	coding	23755041	23904089	4	-1	chromosome
ENSG00000088986	2555.87	-0.192461	0.0656499	-2.93091	0.00337976	0.132235	DYNLL1	dynein light chain LC8-type 1 [Source:HGNC Symbol;Acc:HGNC:15476]	protein_coding	coding	120469850	120498493	12	1	chromosome
ENSG00000101290	1297.09	-0.274599	0.0936573	-2.9299	0.00339068	0.132293	CDS2	CDP-diacylglycerol synthase 2 [Source:HGNC Symbol;Acc:HGNC:1801]	protein_coding	coding	5126786	5197887	20	1	chromosome
ENSG00000124222	1417.9	-0.224049	0.0765801	-2.92484	0.00344632	0.13335	STX16	syntaxin 16 [Source:HGNC Symbol;Acc:HGNC:11431]	protein_coding	coding	58651253	58679526	20	1	chromosome
ENSG00000152952	2454.57	0.265285	0.0906377	2.92651	0.0034279	0.13335	PLOD2	procollagen-lysine,2-oxoglutarate 5-dioxygenase 2 [Source:HGNC Symbol;Acc:HGNC:9082]	protein_coding	coding	146069440	146163653	3	-1	chromosome
ENSG00000161057	1072.23	-0.25954	0.088671	-2.92518	0.00344262	0.13335	PSMC2	proteasome 26S subunit, ATPase 2 [Source:HGNC Symbol;Acc:HGNC:9548]	protein_coding	coding	103344254	103369395	7	1	chromosome
ENSG00000125124	717.548	0.32784	0.112274	2.92209	0.00347689	0.134162	BBS2	Bardet-Biedl syndrome 2 [Source:HGNC Symbol;Acc:HGNC:967]	protein_coding	coding	56466836	56520283	16	-1	chromosome
ENSG00000168283	1007.37	0.298934	0.102506	2.91728	0.003531	0.135267	BMI1	BMI1 proto-oncogene, polycomb ring finger [Source:HGNC Symbol;Acc:HGNC:1066]	protein_coding	coding	22321211	22331484	10	1	chromosome
ENSG00000176248	273.748	-0.343316	0.117513	-2.91697	0.00353449	0.135267	ANAPC2	anaphase promoting complex subunit 2 [Source:HGNC Symbol;Acc:HGNC:19989]	protein_coding	coding	137174784	137188549	9	-1	chromosome
ENSG00000198899	47376.2	-0.155801	0.0534021	-2.91747	0.00352879	0.135267	MT-ATP6	mitochondrially encoded ATP synthase 6 [Source:HGNC Symbol;Acc:HGNC:7414]	protein_coding	mito	8527	9207	MT	1	chromosome
ENSG00000163468	5669.83	-0.19528	0.0670047	-2.91411	0.00356705	0.135942	CCT3	chaperonin containing TCP1 subunit 3 [Source:HGNC Symbol;Acc:HGNC:1616]	protein_coding	coding	156308968	156367873	1	-1	chromosome
ENSG00000172590	844.019	0.26953	0.0925079	2.91372	0.00357154	0.135942	MRPL52	mitochondrial ribosomal protein L52 [Source:HGNC Symbol;Acc:HGNC:16655]	protein_coding	coding	22829879	22835037	14	1	chromosome
ENSG00000113597	212.589	0.363893	0.125233	2.90839	0.003633	0.137163	TRAPPC13	trafficking protein particle complex 13 [Source:HGNC Symbol;Acc:HGNC:25828]	protein_coding	coding	65624716	65666233	5	1	chromosome
ENSG00000125356	892.273	-0.29797	0.102306	-2.90977	0.00361698	0.137163	NDUFA1	NADH:ubiquinone oxidoreductase subunit A1 [Source:HGNC Symbol;Acc:HGNC:7683]	protein_coding	coding	119871487	119876662	X	1	chromosome
ENSG00000149806	2850.38	0.190016	0.0653234	2.90909	0.00362484	0.137163	FAU	FAU, ubiquitin like and ribosomal protein S30 fusion [Source:HGNC Symbol;Acc:HGNC:3597]	protein_coding	coding	65120628	65122473	11	-1	chromosome
ENSG00000133606	629.583	-0.345149	0.118573	-2.90672	0.00365246	0.137527	MKRN1	makorin ring finger protein 1 [Source:HGNC Symbol;Acc:HGNC:7112]	protein_coding	coding	140453040	140479569	7	-1	chromosome
ENSG00000103257	5129.18	-0.165608	0.0570603	-2.90212	0.00370652	0.139188	SLC7A5	solute carrier family 7 member 5 [Source:HGNC Symbol;Acc:HGNC:11063]	protein_coding	coding	87830023	87869488	16	-1	chromosome
ENSG00000106009	263.539	-0.349109	0.120388	-2.89878	0.00374618	0.139827	BRAT1	BRCA1 associated ATM activator 1 [Source:HGNC Symbol;Acc:HGNC:21701]	protein_coding	coding	2537877	2555727	7	-1	chromosome
ENSG00000106392	1923.98	0.213544	0.0736775	2.89817	0.00375348	0.139827	C1GALT1	core 1 synthase, glycoprotein-N-acetylgalactosamine 3-beta-galactosyltransferase 1 [Source:HGNC Symbol;Acc:HGNC:24337]	protein_coding	coding	7156934	7248651	7	1	chromosome
ENSG00000182718	1992.69	-0.245268	0.0845708	-2.89907	0.00374276	0.139827	ANXA2	annexin A2 [Source:HGNC Symbol;Acc:HGNC:537]	protein_coding	coding	60347134	60402883	15	-1	chromosome
ENSG00000125863	1134.49	0.25633	0.0885115	2.89718	0.00376534	0.13986	MKKS	McKusick-Kaufman syndrome [Source:HGNC Symbol;Acc:HGNC:7108]	protein_coding	coding	10401009	10434222	20	-1	chromosome
ENSG00000152684	373.343	0.359333	0.124234	2.89573	0.00378273	0.13986	PELO	pelota mRNA surveillance and ribosome rescue factor [Source:HGNC Symbol;Acc:HGNC:8829]	protein_coding	coding	52787940	52804046	5	1	chromosome
ENSG00000264364	1771.88	-0.211419	0.0729877	-2.8956	0.00378432	0.13986	DYNLL2	dynein light chain LC8-type 2 [Source:HGNC Symbol;Acc:HGNC:24596]	protein_coding	coding	58083415	58095536	17	1	chromosome
ENSG00000166780	35.2204	0.334394	0.119271	2.89322	0.00381311	0.140553	C16orf45	chromosome 16 open reading frame 45 [Source:HGNC Symbol;Acc:HGNC:19213]	protein_coding	coding	15434295	15625028	16	1	chromosome
ENSG00000171055	676.997	0.282004	0.0976955	2.88858	0.00386988	0.142271	FEZ2	fasciculation and elongation protein zeta 2 [Source:HGNC Symbol;Acc:HGNC:3660]	protein_coding	coding	36531805	36646087	2	-1	chromosome
ENSG00000112200	714.349	-0.279962	0.0969422	-2.88589	0.00390311	0.142903	ZNF451	zinc finger protein 451 [Source:HGNC Symbol;Acc:HGNC:21091]	protein_coding	coding	57086844	57170307	6	1	chromosome
ENSG00000197044	150.98	-0.393024	0.136175	-2.88554	0.00390745	0.142903	ZNF441	zinc finger protein 441 [Source:HGNC Symbol;Acc:HGNC:20875]	protein_coding	coding	11767000	11784078	19	1	chromosome
ENSG00000101638	49.2783	0.0615391	0.0406701	2.8821	0.0039504	0.144097	ST8SIA5	ST8 alpha-N-acetyl-neuraminide alpha-2,8-sialyltransferase 5 [Source:HGNC Symbol;Acc:HGNC:17827]	protein_coding	coding	46667821	46759257	18	-1	chromosome
ENSG00000079459	4890.27	-0.179794	0.0624556	-2.87837	0.00399737	0.145431	FDFT1	farnesyl-diphosphate farnesyltransferase 1 [Source:HGNC Symbol;Acc:HGNC:3629]	protein_coding	coding	11795573	11839309	8	1	chromosome
ENSG00000116062	1767.45	0.244154	0.0848886	2.877	0.00401476	0.145686	MSH6	mutS homolog 6 [Source:HGNC Symbol;Acc:HGNC:7329]	protein_coding	coding	47695530	47810101	2	1	chromosome
ENSG00000103249	478.033	-0.318066	0.110651	-2.87524	0.00403723	0.146123	CLCN7	chloride voltage-gated channel 7 [Source:HGNC Symbol;Acc:HGNC:2025]	protein_coding	coding	1444934	1475580	16	-1	chromosome
ENSG00000070413	703.427	-0.298535	0.103984	-2.87061	0.00409679	0.146512	DGCR2	DiGeorge syndrome critical region gene 2 [Source:HGNC Symbol;Acc:HGNC:2845]	protein_coding	coding	19036282	19122454	22	-1	chromosome
ENSG00000105373	732.269	0.298113	0.103809	2.87087	0.00409338	0.146512	NOP53	NOP53 ribosome biogenesis factor [Source:HGNC Symbol;Acc:HGNC:4333]	protein_coding	coding	47745522	47757058	19	1	chromosome
ENSG00000107819	345.805	-0.327331	0.113944	-2.87012	0.00410314	0.146512	SFXN3	sideroflexin 3 [Source:HGNC Symbol;Acc:HGNC:16087]	protein_coding	coding	101031234	101041244	10	1	chromosome
ENSG00000169991	605.085	-0.292056	0.101713	-2.87101	0.00409157	0.146512	IFFO2	intermediate filament family orphan 2 [Source:HGNC Symbol;Acc:HGNC:27006]	protein_coding	coding	18904281	18956686	1	-1	chromosome
ENSG00000231500	16178.2	-0.142579	0.0496859	-2.86954	0.00411076	0.146512	RPS18	ribosomal protein S18 [Source:HGNC Symbol;Acc:HGNC:10401]	protein_coding	coding	33272010	33276510	6	1	chromosome
ENSG00000279118	30.4116	0.136236	0.0633594	2.87254	0.00407183	0.146512	AC093535.2	NA	TEC	other	126496279	126498604	5	1	chromosome
ENSG00000156482	6533.29	-0.164395	0.0573438	-2.86657	0.00414951	0.146773	RPL30	ribosomal protein L30 [Source:HGNC Symbol;Acc:HGNC:10333]	protein_coding	coding	98024851	98046469	8	-1	chromosome
ENSG00000258643	102.985	0.399226	0.139423	2.86789	0.00413214	0.146773	BCL2L2-PABPN1	BCL2L2-PABPN1 readthrough [Source:HGNC Symbol;Acc:HGNC:42959]	protein_coding	coding	23306835	23325369	14	1	chromosome
ENSG00000276234	172.265	0.378643	0.132137	2.8668	0.0041465	0.146773	TADA2A	transcriptional adaptor 2A [Source:HGNC Symbol;Acc:HGNC:11531]	protein_coding	coding	37406874	37479730	17	1	chromosome
ENSG00000142408	38.3764	0.0703283	0.0436274	2.8655	0.00416356	0.146899	CACNG8	calcium voltage-gated channel auxiliary subunit gamma 8 [Source:HGNC Symbol;Acc:HGNC:13628]	protein_coding	coding	53963040	53990215	19	1	chromosome
ENSG00000126698	1914.95	0.194992	0.0680875	2.86401	0.00418313	0.147219	DNAJC8	DnaJ heat shock protein family (Hsp40) member C8 [Source:HGNC Symbol;Acc:HGNC:15470]	protein_coding	coding	28199456	28233025	1	-1	chromosome
ENSG00000087274	1742.24	-0.199623	0.0697533	-2.86134	0.00421857	0.148067	ADD1	adducin 1 [Source:HGNC Symbol;Acc:HGNC:243]	protein_coding	coding	2843857	2930076	4	1	chromosome
ENSG00000140905	1309.39	0.229614	0.0803077	2.85981	0.00423893	0.148067	GCSH	glycine cleavage system protein H [Source:HGNC Symbol;Acc:HGNC:4208]	protein_coding	coding	81081938	81096425	16	-1	chromosome
ENSG00000241978	371.019	-0.397028	0.138632	-2.85989	0.00423782	0.148067	AKAP2	A-kinase anchoring protein 2 [Source:HGNC Symbol;Acc:HGNC:372]	protein_coding	coding	110048598	110172512	9	1	chromosome
ENSG00000078237	346.634	-0.363254	0.126689	-2.8583	0.00425914	0.148403	TIGAR	TP53 induced glycolysis regulatory phosphatase [Source:HGNC Symbol;Acc:HGNC:1185]	protein_coding	coding	4307763	4354593	12	1	chromosome
ENSG00000105137	114.46	0.393202	0.13871	2.85573	0.00429381	0.148929	SYDE1	synapse defective Rho GTPase homolog 1 [Source:HGNC Symbol;Acc:HGNC:25824]	protein_coding	coding	15107403	15114988	19	1	chromosome
ENSG00000257315	156.537	-0.374818	0.131202	-2.8556	0.00429551	0.148929	ZBED6	zinc finger BED-type containing 6 [Source:HGNC Symbol;Acc:HGNC:33273]	protein_coding	coding	203795714	203854999	1	1	chromosome
ENSG00000118777	274.681	0.394098	0.138932	2.85453	0.0043101	0.149066	ABCG2	ATP binding cassette subfamily G member 2 (Junior blood group) [Source:HGNC Symbol;Acc:HGNC:74]	protein_coding	coding	88090264	88231322	4	-1	chromosome
ENSG00000236698	30.7788	-0.31223	0.115061	-2.85336	0.00432595	0.149245	EIF1AXP1	eukaryotic translation initiation factor 1A, X-linked pseudogene 1 [Source:HGNC Symbol;Acc:HGNC:19900]	processed_pseudogene	pseudo	16685621	16686055	1	-1	chromosome
ENSG00000168003	2340.19	-0.222553	0.0780267	-2.85147	0.0043518	0.149768	SLC3A2	solute carrier family 3 member 2 [Source:HGNC Symbol;Acc:HGNC:11026]	protein_coding	coding	62856102	62888875	11	1	chromosome
ENSG00000113205	19.5621	0.122386	0.0592307	2.85049	0.00436516	0.14986	PCDHB3	protocadherin beta 3 [Source:HGNC Symbol;Acc:HGNC:8688]	protein_coding	coding	141100473	141103827	5	1	chromosome
ENSG00000021776	944.585	0.290386	0.101983	2.84874	0.00438924	0.150318	AQR	aquarius intron-binding spliceosomal factor [Source:HGNC Symbol;Acc:HGNC:29513]	protein_coding	coding	34851782	34969839	15	-1	chromosome
ENSG00000081320	108.15	0.392647	0.139154	2.84506	0.00444036	0.15134	STK17B	serine/threonine kinase 17b [Source:HGNC Symbol;Acc:HGNC:11396]	protein_coding	coding	196133566	196176503	2	-1	chromosome
ENSG00000242265	34866.9	0.209688	0.0737036	2.84503	0.00444069	0.15134	PEG10	paternally expressed 10 [Source:HGNC Symbol;Acc:HGNC:14005]	protein_coding	coding	94656325	94669695	7	1	chromosome
ENSG00000197978	154.129	0.382758	0.135229	2.84263	0.00447423	0.152113	GOLGA6L9	golgin A6 family-like 9 [Source:HGNC Symbol;Acc:HGNC:37229]	protein_coding	coding	82430018	82439153	15	1	chromosome
ENSG00000100075	1293.77	-0.229663	0.0808266	-2.84028	0.00450739	0.1525	SLC25A1	solute carrier family 25 member 1 [Source:HGNC Symbol;Acc:HGNC:10979]	protein_coding	coding	19175575	19178830	22	-1	chromosome
ENSG00000156787	200.929	0.395922	0.139364	2.84052	0.00450397	0.1525	TBC1D31	TBC1 domain family member 31 [Source:HGNC Symbol;Acc:HGNC:30888]	protein_coding	coding	123041968	123152153	8	1	chromosome
ENSG00000014216	1034.32	-0.252395	0.088838	-2.83938	0.00452013	0.152563	CAPN1	calpain 1 [Source:HGNC Symbol;Acc:HGNC:1476]	protein_coding	coding	65180566	65212006	11	1	chromosome
ENSG00000077097	1947.76	0.231306	0.0815792	2.83523	0.00457933	0.153026	TOP2B	topoisomerase (DNA) II beta [Source:HGNC Symbol;Acc:HGNC:11990]	protein_coding	coding	25597905	25664907	3	-1	chromosome
ENSG00000101310	2025.64	-0.198624	0.0700505	-2.83459	0.00458847	0.153026	SEC23B	Sec23 homolog B, coat complex II component [Source:HGNC Symbol;Acc:HGNC:10702]	protein_coding	coding	18507493	18561415	20	1	chromosome
ENSG00000147155	989.458	-0.258172	0.0909793	-2.8353	0.00457826	0.153026	EBP	emopamil binding protein (sterol isomerase) [Source:HGNC Symbol;Acc:HGNC:3133]	protein_coding	coding	48521158	48528716	X	1	chromosome
ENSG00000163586	2673.32	-0.242118	0.0853075	-2.8371	0.00455256	0.153026	FABP1	fatty acid binding protein 1 [Source:HGNC Symbol;Acc:HGNC:3555]	protein_coding	coding	88122982	88128116	2	-1	chromosome
ENSG00000178252	1577.11	-0.260714	0.091898	-2.83588	0.00456993	0.153026	WDR6	WD repeat domain 6 [Source:HGNC Symbol;Acc:HGNC:12758]	protein_coding	coding	49007062	49015953	3	1	chromosome
ENSG00000118454	300.657	0.365514	0.129254	2.83097	0.00464076	0.153296	ANKRD13C	ankyrin repeat domain 13C [Source:HGNC Symbol;Acc:HGNC:25374]	protein_coding	coding	70260588	70354734	1	-1	chromosome
ENSG00000148180	3856.23	-0.185356	0.0654429	-2.83193	0.00462682	0.153296	GSN	gelsolin [Source:HGNC Symbol;Acc:HGNC:4620]	protein_coding	coding	121207794	121332843	9	1	chromosome
ENSG00000186184	1371.12	0.236033	0.0833256	2.83241	0.00461982	0.153296	POLR1D	RNA polymerase I subunit D [Source:HGNC Symbol;Acc:HGNC:20422]	protein_coding	coding	27620742	27744237	13	1	chromosome
ENSG00000186283	634.662	0.263496	0.0931498	2.83024	0.00465132	0.153296	TOR3A	torsin family 3 member A [Source:HGNC Symbol;Acc:HGNC:11997]	protein_coding	coding	179081377	179098023	1	1	chromosome
ENSG00000224186	147.897	-0.332458	0.121178	-2.83137	0.00463496	0.153296	C5orf66	chromosome 5 open reading frame 66 [Source:HGNC Symbol;Acc:HGNC:48332]	antisense_RNA	other	135033280	135358219	5	1	chromosome
ENSG00000160796	315.933	-0.393818	0.138936	-2.82836	0.00467866	0.153836	NBEAL2	neurobeachin like 2 [Source:HGNC Symbol;Acc:HGNC:31928]	protein_coding	coding	46979683	47009703	3	1	chromosome
ENSG00000205978	13.0587	-0.215835	0.0851982	-2.82667	0.00470346	0.154289	NYNRIN	NYN domain and retroviral integrase containing [Source:HGNC Symbol;Acc:HGNC:20165]	protein_coding	coding	24398786	24419288	14	1	chromosome
ENSG00000217555	388.162	-0.316902	0.111954	-2.82525	0.00472438	0.154613	CKLF	chemokine like factor [Source:HGNC Symbol;Acc:HGNC:13253]	protein_coding	coding	66552563	66566251	16	1	chromosome
ENSG00000136802	389.171	-0.334711	0.118493	-2.81876	0.00482102	0.157272	LRRC8A	leucine rich repeat containing 8 family member A [Source:HGNC Symbol;Acc:HGNC:19027]	protein_coding	coding	128882112	128918039	9	1	chromosome
ENSG00000145860	500.303	0.293865	0.104357	2.81829	0.00482808	0.157272	RNF145	ring finger protein 145 [Source:HGNC Symbol;Acc:HGNC:20853]	protein_coding	coding	159157409	159210053	5	-1	chromosome
ENSG00000124164	1160.49	-0.24626	0.0876078	-2.80911	0.00496781	0.161074	VAPB	VAMP associated protein B and C [Source:HGNC Symbol;Acc:HGNC:12649]	protein_coding	coding	58389122	58451101	20	1	chromosome
ENSG00000124532	1479.68	0.204336	0.0727314	2.80986	0.00495638	0.161074	MRS2	MRS2, magnesium transporter [Source:HGNC Symbol;Acc:HGNC:13785]	protein_coding	coding	24402908	24426194	6	1	chromosome
ENSG00000114554	822.882	-0.351226	0.125145	-2.80765	0.00499051	0.161437	PLXNA1	plexin A1 [Source:HGNC Symbol;Acc:HGNC:9099]	protein_coding	coding	126988594	127037392	3	1	chromosome
ENSG00000167654	14.8194	0.147804	0.0661493	2.80596	0.00501664	0.161908	ATCAY	ATCAY, caytaxin [Source:HGNC Symbol;Acc:HGNC:779]	protein_coding	coding	3879864	3928079	19	1	chromosome
ENSG00000089820	20.2194	0.134056	0.0630533	2.79389	0.00520778	0.162705	ARHGAP4	Rho GTPase activating protein 4 [Source:HGNC Symbol;Acc:HGNC:674]	protein_coding	coding	153907367	153934999	X	-1	chromosome
ENSG00000096968	113.563	0.34377	0.126192	2.79453	0.00519756	0.162705	JAK2	Janus kinase 2 [Source:HGNC Symbol;Acc:HGNC:6192]	protein_coding	coding	4984390	5128183	9	1	chromosome
ENSG00000109107	221.988	-0.355018	0.126581	-2.79617	0.00517119	0.162705	ALDOC	aldolase, fructose-bisphosphate C [Source:HGNC Symbol;Acc:HGNC:418]	protein_coding	coding	28573115	28577264	17	-1	chromosome
ENSG00000113460	748.378	0.307347	0.109909	2.79521	0.0051866	0.162705	BRIX1	BRX1, biogenesis of ribosomes [Source:HGNC Symbol;Acc:HGNC:24170]	protein_coding	coding	34915376	34925996	5	1	chromosome
ENSG00000123836	271.217	-0.326106	0.116542	-2.79473	0.00519435	0.162705	PFKFB2	6-phosphofructo-2-kinase/fructose-2,6-biphosphatase 2 [Source:HGNC Symbol;Acc:HGNC:8873]	protein_coding	coding	207034366	207081024	1	1	chromosome
ENSG00000127481	3109.75	-0.19702	0.0704438	-2.79653	0.00516549	0.162705	UBR4	ubiquitin protein ligase E3 component n-recognin 4 [Source:HGNC Symbol;Acc:HGNC:30313]	protein_coding	coding	19074506	19210276	1	-1	chromosome
ENSG00000137513	557.458	0.288228	0.102927	2.80152	0.0050862	0.162705	NARS2	asparaginyl-tRNA synthetase 2, mitochondrial (putative) [Source:HGNC Symbol;Acc:HGNC:26274]	protein_coding	coding	78435961	78574874	11	-1	chromosome
ENSG00000138069	3646.24	-0.217056	0.0775955	-2.79658	0.00516474	0.162705	RAB1A	RAB1A, member RAS oncogene family [Source:HGNC Symbol;Acc:HGNC:9758]	protein_coding	coding	65070701	65130106	2	-1	chromosome
ENSG00000138074	2069.87	-0.201136	0.0718182	-2.80027	0.005106	0.162705	SLC5A6	solute carrier family 5 member 6 [Source:HGNC Symbol;Acc:HGNC:11041]	protein_coding	coding	27199587	27212958	2	-1	chromosome
ENSG00000163697	455.028	-0.309119	0.110569	-2.79608	0.00517265	0.162705	APBB2	amyloid beta precursor protein binding family B member 2 [Source:HGNC Symbol;Acc:HGNC:582]	protein_coding	coding	40810027	41216714	4	-1	chromosome
ENSG00000165819	1093.41	-0.222488	0.079465	-2.7983	0.0051373	0.162705	METTL3	methyltransferase like 3 [Source:HGNC Symbol;Acc:HGNC:17563]	protein_coding	coding	21498133	21511375	14	-1	chromosome
ENSG00000186395	178.369	0.368457	0.132004	2.79341	0.00521557	0.162705	KRT10	keratin 10 [Source:HGNC Symbol;Acc:HGNC:6413]	protein_coding	coding	40818117	40822595	17	-1	chromosome
ENSG00000196715	842.883	0.264194	0.0943234	2.80049	0.00510245	0.162705	VKORC1L1	vitamin K epoxide reductase complex subunit 1 like 1 [Source:HGNC Symbol;Acc:HGNC:21492]	protein_coding	coding	65873267	65959563	7	1	chromosome
ENSG00000250251	184.618	-0.375959	0.133913	-2.79744	0.00515094	0.162705	PKD1P6	polycystin 1, transient receptor potential channel interacting pseudogene 6 [Source:HGNC Symbol;Acc:HGNC:30070]	transcribed_unprocessed_pseudogene	pseudo	15125242	15154564	16	-1	chromosome
ENSG00000258891	15.7527	0.180605	0.074898	2.79621	0.00517056	0.162705	AC005480.1	NA	antisense_RNA	other	73896164	73938114	14	-1	chromosome
ENSG00000124486	1613.49	0.324004	0.116093	2.79191	0.00523977	0.163096	USP9X	ubiquitin specific peptidase 9, X-linked [Source:HGNC Symbol;Acc:HGNC:12632]	protein_coding	coding	41085635	41236579	X	1	chromosome
ENSG00000173402	2579.33	-0.186994	0.0670001	-2.79028	0.00526632	0.16356	DAG1	dystroglycan 1 [Source:HGNC Symbol;Acc:HGNC:2666]	protein_coding	coding	49468703	49535618	3	1	chromosome
ENSG00000068971	56.5286	0.349595	0.127444	2.78608	0.00533492	0.163642	PPP2R5B	protein phosphatase 2 regulatory subunit B'beta [Source:HGNC Symbol;Acc:HGNC:9310]	protein_coding	coding	64917553	64934473	11	1	chromosome
ENSG00000084110	34.5336	0.188041	0.0792739	2.78853	0.00529479	0.163642	HAL	histidine ammonia-lyase [Source:HGNC Symbol;Acc:HGNC:4806]	protein_coding	coding	95972662	95996365	12	-1	chromosome
ENSG00000100439	434.71	-0.331767	0.119084	-2.78734	0.00531432	0.163642	ABHD4	abhydrolase domain containing 4 [Source:HGNC Symbol;Acc:HGNC:20154]	protein_coding	coding	22598237	22613215	14	1	chromosome
ENSG00000103042	289.052	-0.353342	0.12674	-2.78916	0.00528447	0.163642	SLC38A7	solute carrier family 38 member 7 [Source:HGNC Symbol;Acc:HGNC:25582]	protein_coding	coding	58665109	58685104	16	-1	chromosome
ENSG00000105443	188.897	0.371812	0.133592	2.78603	0.00533579	0.163642	CYTH2	cytohesin 2 [Source:HGNC Symbol;Acc:HGNC:9502]	protein_coding	coding	48469032	48482314	19	1	chromosome
ENSG00000198712	81468.6	-0.158711	0.0569703	-2.78583	0.00533908	0.163642	MT-CO2	mitochondrially encoded cytochrome c oxidase II [Source:HGNC Symbol;Acc:HGNC:7421]	protein_coding	mito	7586	8269	MT	1	chromosome
ENSG00000249859	114.04	0.389242	0.139432	2.78488	0.00535471	0.163763	PVT1	Pvt1 oncogene (non-protein coding) [Source:HGNC Symbol;Acc:HGNC:9709]	lincRNA	noncoding	127794533	128101253	8	1	chromosome
ENSG00000137038	415.425	-0.337778	0.12136	-2.77587	0.00550536	0.168003	DMAC1	distal membrane arm assembly complex 1 [Source:HGNC Symbol;Acc:HGNC:30536]	protein_coding	coding	7796490	7888380	9	-1	chromosome
ENSG00000170633	598.428	-0.266302	0.0960717	-2.77047	0.00559757	0.170446	RNF34	ring finger protein 34 [Source:HGNC Symbol;Acc:HGNC:17297]	protein_coding	coding	121400041	121430623	12	1	chromosome
ENSG00000049192	111.638	0.33838	0.125251	2.76935	0.00561686	0.170663	ADAMTS6	ADAM metallopeptidase with thrombospondin type 1 motif 6 [Source:HGNC Symbol;Acc:HGNC:222]	protein_coding	coding	65148736	65481920	5	-1	chromosome
ENSG00000248871	15.8447	0.147646	0.0660288	2.76716	0.00565468	0.171069	TNFSF12-TNFSF13	TNFSF12-TNFSF13 readthrough [Source:HGNC Symbol;Acc:HGNC:33537]	protein_coding	coding	7549099	7561601	17	1	chromosome
ENSG00000259642	57.4534	-0.373298	0.135095	-2.76718	0.00565437	0.171069	ST20-AS1	ST20 antisense RNA 1 [Source:HGNC Symbol;Acc:HGNC:27521]	antisense_RNA	other	79922771	79926993	15	1	chromosome
ENSG00000102144	4928.79	0.17831	0.064474	2.7657	0.00568005	0.171467	PGK1	phosphoglycerate kinase 1 [Source:HGNC Symbol;Acc:HGNC:8896]	protein_coding	coding	78065188	78129296	X	1	chromosome
ENSG00000124092	11.4686	0.191094	0.077071	2.76116	0.0057596	0.172843	CTCFL	CCCTC-binding factor like [Source:HGNC Symbol;Acc:HGNC:16234]	protein_coding	coding	57495966	57525652	20	-1	chromosome
ENSG00000136828	108.994	0.364396	0.133965	2.76197	0.00574536	0.172843	RALGPS1	Ral GEF with PH domain and SH3 binding motif 1 [Source:HGNC Symbol;Acc:HGNC:16851]	protein_coding	coding	126914774	127223166	9	1	chromosome
ENSG00000250151	85.1028	-0.383984	0.139232	-2.76099	0.00576266	0.172843	ARPC4-TTLL3	ARPC4-TTLL3 readthrough [Source:HGNC Symbol;Acc:HGNC:38830]	protein_coding	coding	9793082	9835401	3	1	chromosome
ENSG00000132471	631.471	-0.293519	0.106279	-2.75856	0.00580568	0.173761	WBP2	WW domain binding protein 2 [Source:HGNC Symbol;Acc:HGNC:12738]	protein_coding	coding	75845699	75856507	17	-1	chromosome
ENSG00000126457	1909.85	-0.223805	0.0812276	-2.75424	0.00588282	0.175408	PRMT1	protein arginine methyltransferase 1 [Source:HGNC Symbol;Acc:HGNC:5187]	protein_coding	coding	49675786	49689029	19	1	chromosome
ENSG00000168653	1829.34	-0.200393	0.0727383	-2.75408	0.00588575	0.175408	NDUFS5	NADH:ubiquinone oxidoreductase subunit S5 [Source:HGNC Symbol;Acc:HGNC:7712]	protein_coding	coding	39026318	39034636	1	1	chromosome
ENSG00000213753	244.374	0.380796	0.138682	2.75332	0.00589946	0.175443	CENPBD1P1	CENPB DNA-binding domains containing 1 pseudogene 1 [Source:HGNC Symbol;Acc:HGNC:28421]	transcribed_processed_pseudogene	pseudo	58573503	58599801	19	1	chromosome
ENSG00000010244	2508.42	-0.158584	0.0576451	-2.75073	0.00594634	0.175718	ZNF207	zinc finger protein 207 [Source:HGNC Symbol;Acc:HGNC:12998]	protein_coding	coding	32350117	32381886	17	1	chromosome
ENSG00000144867	913.828	-0.297293	0.108091	-2.75204	0.00592249	0.175718	SRPRB	SRP receptor beta subunit [Source:HGNC Symbol;Acc:HGNC:24085]	protein_coding	coding	133784033	133825772	3	1	chromosome
ENSG00000235890	60.5854	-0.365937	0.134929	-2.75141	0.0059339	0.175718	TSPEAR-AS1	TSPEAR antisense RNA 1 [Source:HGNC Symbol;Acc:HGNC:1271]	antisense_RNA	other	44506807	44516575	21	1	chromosome
ENSG00000099817	1227.35	-0.259578	0.0944612	-2.74748	0.00600549	0.177092	POLR2E	RNA polymerase II subunit E [Source:HGNC Symbol;Acc:HGNC:9192]	protein_coding	coding	1086579	1095380	19	-1	chromosome
ENSG00000153310	865.491	0.26178	0.0954149	2.74498	0.00605146	0.178073	FAM49B	family with sequence similarity 49 member B [Source:HGNC Symbol;Acc:HGNC:25216]	protein_coding	coding	129839593	130017129	8	-1	chromosome
ENSG00000117984	2330.63	-0.233944	0.0853025	-2.74149	0.00611609	0.179222	CTSD	cathepsin D [Source:HGNC Symbol;Acc:HGNC:2529]	protein_coding	coding	1752752	1764573	11	-1	chromosome
ENSG00000136052	156.917	0.380165	0.139366	2.74182	0.00611007	0.179222	SLC41A2	solute carrier family 41 member 2 [Source:HGNC Symbol;Acc:HGNC:31045]	protein_coding	coding	104802553	104958744	12	-1	chromosome
ENSG00000273559	284.873	-0.318801	0.116146	-2.74068	0.00613116	0.179289	CWC25	CWC25 spliceosome associated protein homolog [Source:HGNC Symbol;Acc:HGNC:25989]	protein_coding	coding	38800434	38825481	17	-1	chromosome
ENSG00000138778	687.142	0.316083	0.115321	2.73996	0.00614462	0.179308	CENPE	centromere protein E [Source:HGNC Symbol;Acc:HGNC:1856]	protein_coding	coding	103105806	103198409	4	-1	chromosome
ENSG00000072501	1803.64	-0.237703	0.0868554	-2.73667	0.00620651	0.180362	SMC1A	structural maintenance of chromosomes 1A [Source:HGNC Symbol;Acc:HGNC:11111]	protein_coding	coding	53374149	53422728	X	-1	chromosome
ENSG00000177697	1315.17	-0.253446	0.0925306	-2.73722	0.00619612	0.180362	CD151	CD151 molecule (Raph blood group) [Source:HGNC Symbol;Acc:HGNC:1630]	protein_coding	coding	832843	839831	11	1	chromosome
ENSG00000186010	873.311	-0.279343	0.102054	-2.73458	0.00624606	0.181136	NDUFA13	NADH:ubiquinone oxidoreductase subunit A13 [Source:HGNC Symbol;Acc:HGNC:17194]	protein_coding	coding	19515736	19529054	19	1	chromosome
ENSG00000146540	528.827	0.259106	0.0948231	2.73382	0.0062605	0.181179	C7orf50	chromosome 7 open reading frame 50 [Source:HGNC Symbol;Acc:HGNC:22421]	protein_coding	coding	996986	1138260	7	-1	chromosome
ENSG00000161996	270.126	-0.340678	0.1244	-2.7325	0.00628552	0.181528	WDR90	WD repeat domain 90 [Source:HGNC Symbol;Acc:HGNC:26960]	protein_coding	coding	649311	667833	16	1	chromosome
ENSG00000048342	120.345	0.377663	0.139147	2.73067	0.00632055	0.182164	CC2D2A	coiled-coil and C2 domain containing 2A [Source:HGNC Symbol;Acc:HGNC:29253]	protein_coding	coding	15469865	15601557	4	1	chromosome
ENSG00000115363	432.552	0.290552	0.106536	2.72954	0.00634228	0.182415	EVA1A	eva-1 homolog A, regulator of programmed cell death [Source:HGNC Symbol;Acc:HGNC:25816]	protein_coding	coding	75469302	75569722	2	-1	chromosome
ENSG00000152767	2435.63	-0.224855	0.0824197	-2.72815	0.00636899	0.182808	FARP1	FERM, ARH/RhoGEF and pleckstrin domain protein 1 [Source:HGNC Symbol;Acc:HGNC:3591]	protein_coding	coding	98142562	98455176	13	1	chromosome
ENSG00000170473	385.456	0.278498	0.102255	2.72536	0.00642323	0.183988	PYM1	PYM homolog 1, exon junction complex associated factor [Source:HGNC Symbol;Acc:HGNC:30258]	protein_coding	coding	55901413	55932618	12	-1	chromosome
ENSG00000135940	1892.01	0.183907	0.0675382	2.72306	0.0064681	0.184895	COX5B	cytochrome c oxidase subunit 5B [Source:HGNC Symbol;Acc:HGNC:2269]	protein_coding	coding	97646040	97648383	2	1	chromosome
ENSG00000105825	17.5145	0.243247	0.0952614	2.72172	0.00649437	0.185029	TFPI2	tissue factor pathway inhibitor 2 [Source:HGNC Symbol;Acc:HGNC:11761]	protein_coding	coding	93885397	93890991	7	-1	chromosome
ENSG00000112992	920.909	0.297914	0.109561	2.72147	0.00649919	0.185029	NNT	nicotinamide nucleotide transhydrogenase [Source:HGNC Symbol;Acc:HGNC:7863]	protein_coding	coding	43602692	43707405	5	1	chromosome
ENSG00000067955	931.811	0.263921	0.0971781	2.71799	0.00656798	0.18623	CBFB	core-binding factor beta subunit [Source:HGNC Symbol;Acc:HGNC:1539]	protein_coding	coding	67029116	67101058	16	1	chromosome
ENSG00000101439	3627.93	-0.247105	0.090883	-2.71837	0.00656043	0.18623	CST3	cystatin C [Source:HGNC Symbol;Acc:HGNC:2475]	protein_coding	coding	23626706	23638473	20	-1	chromosome
ENSG00000099901	2455.1	0.227376	0.0837646	2.71456	0.00663642	0.186233	RANBP1	RAN binding protein 1 [Source:HGNC Symbol;Acc:HGNC:9847]	protein_coding	coding	20115938	20127357	22	1	chromosome
ENSG00000100522	1660.33	0.27028	0.0995712	2.71452	0.00663719	0.186233	GNPNAT1	glucosamine-phosphate N-acetyltransferase 1 [Source:HGNC Symbol;Acc:HGNC:19980]	protein_coding	coding	52775194	52791668	14	-1	chromosome
ENSG00000113048	1570.42	0.238359	0.0878329	2.71455	0.00663664	0.186233	MRPS27	mitochondrial ribosomal protein S27 [Source:HGNC Symbol;Acc:HGNC:14512]	protein_coding	coding	72219409	72320646	5	-1	chromosome
ENSG00000114346	1245.73	0.19397	0.0713972	2.71721	0.00658356	0.186233	ECT2	epithelial cell transforming 2 [Source:HGNC Symbol;Acc:HGNC:3155]	protein_coding	coding	172750682	172821474	3	1	chromosome
ENSG00000168397	891.35	-0.247359	0.0910803	-2.71399	0.00664786	0.186233	ATG4B	autophagy related 4B cysteine peptidase [Source:HGNC Symbol;Acc:HGNC:20790]	protein_coding	coding	241637213	241673857	2	1	chromosome
ENSG00000172650	33.6942	0.341547	0.126472	2.71473	0.00663292	0.186233	AGAP5	ArfGAP with GTPase domain, ankyrin repeat and PH domain 5 [Source:HGNC Symbol;Acc:HGNC:23467]	protein_coding	coding	73674285	73698159	10	-1	chromosome
ENSG00000133997	472.287	0.291259	0.107541	2.71184	0.00669117	0.1867	MED6	mediator complex subunit 6 [Source:HGNC Symbol;Acc:HGNC:19970]	protein_coding	coding	70581257	70600690	14	-1	chromosome
ENSG00000136153	2123.32	0.221407	0.081658	2.71222	0.00668345	0.1867	LMO7	LIM domain 7 [Source:HGNC Symbol;Acc:HGNC:6646]	protein_coding	coding	75620434	75859870	13	1	chromosome
ENSG00000143373	301.095	-0.309599	0.113987	-2.71117	0.00670462	0.186703	ZNF687	zinc finger protein 687 [Source:HGNC Symbol;Acc:HGNC:29277]	protein_coding	coding	151281618	151292180	1	1	chromosome
ENSG00000154518	3928.91	-0.15205	0.0560998	-2.71021	0.00672397	0.18687	ATP5G3	ATP synthase, H+ transporting, mitochondrial Fo complex subunit C3 (subunit 9) [Source:HGNC Symbol;Acc:HGNC:843]	protein_coding	coding	175176258	175184607	2	-1	chromosome
ENSG00000177728	508.892	-0.32156	0.118484	-2.70844	0.00675994	0.187276	TMEM94	transmembrane protein 94 [Source:HGNC Symbol;Acc:HGNC:28983]	protein_coding	coding	75441159	75500090	17	1	chromosome
ENSG00000205323	546.182	0.281643	0.10398	2.70818	0.0067653	0.187276	SARNP	SAP domain containing ribonucleoprotein [Source:HGNC Symbol;Acc:HGNC:24432]	protein_coding	coding	55752463	55817756	12	-1	chromosome
ENSG00000166669	609.143	-0.2982	0.110009	-2.70659	0.00679789	0.187807	ATF7IP2	activating transcription factor 7 interacting protein 2 [Source:HGNC Symbol;Acc:HGNC:20397]	protein_coding	coding	10326434	10483638	16	1	chromosome
ENSG00000120899	49.9317	0.362029	0.133961	2.70568	0.00681648	0.187907	PTK2B	protein tyrosine kinase 2 beta [Source:HGNC Symbol;Acc:HGNC:9612]	protein_coding	coding	27311482	27459391	8	1	chromosome
ENSG00000136319	275.222	-0.356313	0.131328	-2.7051	0.00682834	0.187907	TTC5	tetratricopeptide repeat domain 5 [Source:HGNC Symbol;Acc:HGNC:19274]	protein_coding	coding	20256558	20305994	14	-1	chromosome
ENSG00000196365	1174.59	-0.217576	0.080463	-2.70338	0.00686391	0.187918	LONP1	lon peptidase 1, mitochondrial [Source:HGNC Symbol;Acc:HGNC:9479]	protein_coding	coding	5691834	5720572	19	-1	chromosome
ENSG00000214114	449.003	0.374835	0.138966	2.70442	0.0068423	0.187918	MYCBP	MYC binding protein [Source:HGNC Symbol;Acc:HGNC:7554]	protein_coding	coding	38862964	38874105	1	-1	chromosome
ENSG00000257489	14.6118	-0.237324	0.0950793	-2.70313	0.00686899	0.187918	AC010203.1	NA	transcribed_unprocessed_pseudogene	pseudo	100173196	100199783	12	-1	chromosome
ENSG00000127720	69.9879	0.369121	0.137613	2.70076	0.00691806	0.188158	METTL25	methyltransferase like 25 [Source:HGNC Symbol;Acc:HGNC:26228]	protein_coding	coding	82358497	82479236	12	1	chromosome
ENSG00000139679	426.242	0.314614	0.116415	2.70199	0.00689248	0.188158	LPAR6	lysophosphatidic acid receptor 6 [Source:HGNC Symbol;Acc:HGNC:15520]	protein_coding	coding	48389567	48444704	13	-1	chromosome
ENSG00000153006	389.731	0.331606	0.123051	2.70108	0.00691149	0.188158	SREK1IP1	SREK1 interacting protein 1 [Source:HGNC Symbol;Acc:HGNC:26716]	protein_coding	coding	64718144	64768685	5	-1	chromosome
ENSG00000090339	1114.26	0.254399	0.0943085	2.69836	0.00696816	0.189153	ICAM1	intercellular adhesion molecule 1 [Source:HGNC Symbol;Acc:HGNC:5344]	protein_coding	coding	10270835	10286615	19	1	chromosome
ENSG00000279765	55.8906	0.243907	0.0976339	2.69705	0.00699564	0.189532	AC013394.1	NA	protein_coding	coding	92883413	92949230	15	1	chromosome
ENSG00000179899	19.6478	-0.245052	0.0950521	-2.69592	0.00701949	0.189784	PHC1P1	polyhomeotic homolog 1 pseudogene 1 [Source:HGNC Symbol;Acc:HGNC:34502]	processed_pseudogene	pseudo	55411727	55414787	12	-1	chromosome
ENSG00000197122	1273.16	-0.221709	0.0822212	-2.69532	0.00703203	0.189784	SRC	SRC proto-oncogene, non-receptor tyrosine kinase [Source:HGNC Symbol;Acc:HGNC:11283]	protein_coding	coding	37344685	37406050	20	1	chromosome
ENSG00000142168	3504.55	-0.199034	0.073902	-2.69262	0.0070892	0.190959	SOD1	superoxide dismutase 1 [Source:HGNC Symbol;Acc:HGNC:11179]	protein_coding	coding	31659622	31668931	21	1	chromosome
ENSG00000246792	16.2303	0.178884	0.0760527	2.69044	0.00713569	0.191842	AC106038.1	NA	antisense_RNA	other	90646441	90656598	8	1	chromosome
ENSG00000168014	301.618	0.352341	0.131458	2.68936	0.00715884	0.19194	C2CD3	C2 calcium dependent domain containing 3 [Source:HGNC Symbol;Acc:HGNC:24564]	protein_coding	coding	74012714	74171210	11	-1	chromosome
ENSG00000188739	503.143	0.30101	0.112106	2.68899	0.00716675	0.19194	RBM34	RNA binding motif protein 34 [Source:HGNC Symbol;Acc:HGNC:28965]	protein_coding	coding	235131183	235161457	1	-1	chromosome
ENSG00000151502	391.149	-0.30661	0.113819	-2.6878	0.0071924	0.192259	VPS26B	VPS26, retromer complex component B [Source:HGNC Symbol;Acc:HGNC:28119]	protein_coding	coding	134224645	134247792	11	1	chromosome
ENSG00000113068	771.899	-0.227689	0.0847246	-2.68664	0.00721743	0.192561	PFDN1	prefoldin subunit 1 [Source:HGNC Symbol;Acc:HGNC:8866]	protein_coding	coding	140245039	140303121	5	-1	chromosome
ENSG00000125971	901.739	-0.26256	0.0976783	-2.68548	0.00724263	0.192866	DYNLRB1	dynein light chain roadblock-type 1 [Source:HGNC Symbol;Acc:HGNC:15468]	protein_coding	coding	34516409	34540958	20	1	chromosome
ENSG00000034677	648.864	-0.2988	0.111337	-2.68356	0.00728438	0.193285	RNF19A	ring finger protein 19A, RBR E3 ubiquitin protein ligase [Source:HGNC Symbol;Acc:HGNC:13432]	protein_coding	coding	100257060	100336218	8	-1	chromosome
ENSG00000108010	1306.61	0.216621	0.0807222	2.68348	0.00728597	0.193285	GLRX3	glutaredoxin 3 [Source:HGNC Symbol;Acc:HGNC:15987]	protein_coding	coding	130136399	130184521	10	1	chromosome
ENSG00000274333	379.535	0.348227	0.130184	2.68245	0.00730849	0.193516	CU633967.1	NA	lincRNA	noncoding	5553637	5614880	21	1	chromosome
ENSG00000135045	274.336	0.304549	0.113634	2.68149	0.00732951	0.193706	C9orf40	chromosome 9 open reading frame 40 [Source:HGNC Symbol;Acc:HGNC:23433]	protein_coding	coding	74946581	74952886	9	-1	chromosome
ENSG00000102038	4271.51	0.182688	0.0681716	2.67982	0.0073661	0.194206	SMARCA1	SWI/SNF related, matrix associated, actin dependent regulator of chromatin, subfamily a, member 1 [Source:HGNC Symbol;Acc:HGNC:11097]	protein_coding	coding	129446501	129523500	X	-1	chromosome
ENSG00000232775	15.2402	-0.265561	0.104024	-2.67937	0.00737614	0.194206	BMS1P22	BMS1, ribosome biogenesis factor pseudogene 22 [Source:HGNC Symbol;Acc:HGNC:51603]	transcribed_unprocessed_pseudogene	pseudo	15805263	15820884	22	-1	chromosome
ENSG00000083844	133.081	-0.372375	0.138878	-2.67723	0.00742346	0.195085	ZNF264	zinc finger protein 264 [Source:HGNC Symbol;Acc:HGNC:13057]	protein_coding	coding	57191500	57222846	19	1	chromosome
ENSG00000100201	4566.18	-0.155831	0.0583334	-2.67121	0.00755777	0.196891	DDX17	DEAD-box helicase 17 [Source:HGNC Symbol;Acc:HGNC:2740]	protein_coding	coding	38483440	38507660	22	-1	chromosome
ENSG00000107742	380.06	-0.279184	0.104402	-2.67249	0.00752895	0.196891	SPOCK2	SPARC/osteonectin, cwcv and kazal like domains proteoglycan 2 [Source:HGNC Symbol;Acc:HGNC:13564]	protein_coding	coding	72059035	72089032	10	-1	chromosome
ENSG00000116161	1730.04	0.209744	0.0785605	2.67038	0.00757651	0.196891	CACYBP	calcyclin binding protein [Source:HGNC Symbol;Acc:HGNC:30423]	protein_coding	coding	174999163	175011715	1	1	chromosome
ENSG00000132341	6179.27	-0.153856	0.0576006	-2.67089	0.00756508	0.196891	RAN	RAN, member RAS oncogene family [Source:HGNC Symbol;Acc:HGNC:9846]	protein_coding	coding	130871879	130877678	12	1	chromosome
ENSG00000164329	623.467	0.290947	0.109076	2.67112	0.00755994	0.196891	PAPD4	poly(A) RNA polymerase D4, non-canonical [Source:HGNC Symbol;Acc:HGNC:26776]	protein_coding	coding	79612120	79686648	5	1	chromosome
ENSG00000198276	722.674	-0.279928	0.104573	-2.67319	0.00751346	0.196891	UCKL1	uridine-cytidine kinase 1 like 1 [Source:HGNC Symbol;Acc:HGNC:15938]	protein_coding	coding	63939829	63956415	20	-1	chromosome
ENSG00000109790	756.853	-0.226651	0.0849402	-2.66707	0.00765154	0.197294	KLHL5	kelch like family member 5 [Source:HGNC Symbol;Acc:HGNC:6356]	protein_coding	coding	39045039	39126857	4	1	chromosome
ENSG00000148200	693.794	-0.286702	0.107484	-2.66841	0.00762105	0.197294	NR6A1	nuclear receptor subfamily 6 group A member 1 [Source:HGNC Symbol;Acc:HGNC:7985]	protein_coding	coding	124517275	124771310	9	-1	chromosome
ENSG00000163840	404.426	0.351479	0.131995	2.66904	0.00760678	0.197294	DTX3L	deltex E3 ubiquitin ligase 3L [Source:HGNC Symbol;Acc:HGNC:30323]	protein_coding	coding	122564238	122575203	3	1	chromosome
ENSG00000165832	737.071	0.234007	0.087793	2.66659	0.00766247	0.197294	TRUB1	TruB pseudouridine synthase family member 1 [Source:HGNC Symbol;Acc:HGNC:16060]	protein_coding	coding	114938193	114977676	10	1	chromosome
ENSG00000177200	714.639	0.35298	0.132276	2.66731	0.00764601	0.197294	CHD9	chromodomain helicase DNA binding protein 9 [Source:HGNC Symbol;Acc:HGNC:25701]	protein_coding	coding	53055033	53329150	16	1	chromosome
ENSG00000100097	1355.47	-0.201679	0.0757159	-2.66342	0.00773514	0.197352	LGALS1	galectin 1 [Source:HGNC Symbol;Acc:HGNC:6561]	protein_coding	coding	37675608	37679806	22	1	chromosome
ENSG00000103876	702.598	-0.270182	0.101358	-2.66522	0.00769382	0.197352	FAH	fumarylacetoacetate hydrolase [Source:HGNC Symbol;Acc:HGNC:3579]	protein_coding	coding	80152490	80186946	15	1	chromosome
ENSG00000173473	2022.58	-0.164207	0.0616185	-2.6645	0.00771017	0.197352	SMARCC1	SWI/SNF related, matrix associated, actin dependent regulator of chromatin subfamily c member 1 [Source:HGNC Symbol;Acc:HGNC:11104]	protein_coding	coding	47585272	47782106	3	-1	chromosome
ENSG00000182621	853.86	0.288076	0.108247	2.66416	0.00771818	0.197352	PLCB1	phospholipase C beta 1 [Source:HGNC Symbol;Acc:HGNC:15917]	protein_coding	coding	8077251	8968360	20	1	chromosome
ENSG00000187079	910.025	0.346199	0.130158	2.66389	0.00772423	0.197352	TEAD1	TEA domain transcription factor 1 [Source:HGNC Symbol;Acc:HGNC:11714]	protein_coding	coding	12674591	12944483	11	1	chromosome
ENSG00000135241	203.733	0.346952	0.130419	2.66278	0.00774987	0.197368	PNPLA8	patatin like phospholipase domain containing 8 [Source:HGNC Symbol;Acc:HGNC:28900]	protein_coding	coding	108470422	108569666	7	-1	chromosome
ENSG00000035664	19.7632	0.179343	0.0768618	2.66193	0.00776935	0.197485	DAPK2	death associated protein kinase 2 [Source:HGNC Symbol;Acc:HGNC:2675]	protein_coding	coding	63907036	64072033	15	-1	chromosome
ENSG00000182165	147.169	0.350469	0.131979	2.66136	0.00778266	0.197485	TP53TG1	TP53 target 1 (non-protein coding) [Source:HGNC Symbol;Acc:HGNC:17026]	lincRNA	noncoding	87325225	87345515	7	-1	chromosome
ENSG00000072110	2168.45	-0.232438	0.0875379	-2.65435	0.00794621	0.199825	ACTN1	actinin alpha 1 [Source:HGNC Symbol;Acc:HGNC:163]	protein_coding	coding	68874143	68979440	14	-1	chromosome
ENSG00000164066	211.462	0.357927	0.135289	2.65573	0.00791377	0.199825	INTU	inturned planar cell polarity protein [Source:HGNC Symbol;Acc:HGNC:29239]	protein_coding	coding	127623271	127726737	4	1	chromosome
ENSG00000172007	180.692	0.346488	0.130826	2.6544	0.00794504	0.199825	RAB33B	RAB33B, member RAS oncogene family [Source:HGNC Symbol;Acc:HGNC:16075]	protein_coding	coding	139453232	139476609	4	1	chromosome
ENSG00000187607	247.729	0.368303	0.139137	2.65569	0.00791471	0.199825	ZNF286A	zinc finger protein 286A [Source:HGNC Symbol;Acc:HGNC:13501]	protein_coding	coding	15699577	15720787	17	1	chromosome
ENSG00000278615	355.769	0.306286	0.115306	2.65554	0.00791815	0.199825	C11orf98	chromosome 11 open reading frame 98 [Source:HGNC Symbol;Acc:HGNC:51238]	protein_coding	coding	62662816	62665217	11	-1	chromosome
ENSG00000065978	9310.69	-0.138384	0.0521584	-2.65301	0.0079778	0.199902	YBX1	Y-box binding protein 1 [Source:HGNC Symbol;Acc:HGNC:8014]	protein_coding	coding	42682427	42702349	1	1	chromosome
ENSG00000206561	14.0261	0.139333	0.0648798	2.65331	0.00797057	0.199902	COLQ	collagen like tail subunit of asymmetric acetylcholinesterase [Source:HGNC Symbol;Acc:HGNC:2226]	protein_coding	coding	15450133	15521751	3	-1	chromosome
ENSG00000141526	3268.88	-0.155504	0.0586229	-2.65228	0.00799511	0.199978	SLC16A3	solute carrier family 16 member 3 [Source:HGNC Symbol;Acc:HGNC:10924]	protein_coding	coding	82228397	82261129	17	1	chromosome
ENSG00000037637	270.447	0.344957	0.130418	2.65059	0.00803513	0.200263	FBXO42	F-box protein 42 [Source:HGNC Symbol;Acc:HGNC:29249]	protein_coding	coding	16246839	16352454	1	-1	chromosome
ENSG00000070759	110.68	0.352922	0.134768	2.6506	0.0080349	0.200263	TESK2	testis-specific kinase 2 [Source:HGNC Symbol;Acc:HGNC:11732]	protein_coding	coding	45343883	45491166	1	-1	chromosome
ENSG00000089009	10137.8	0.147548	0.0557862	2.64485	0.0081726	0.201893	RPL6	ribosomal protein L6 [Source:HGNC Symbol;Acc:HGNC:10362]	protein_coding	coding	112405190	112418838	12	-1	chromosome
ENSG00000100644	2681.1	-0.168661	0.0637429	-2.64584	0.00814893	0.201893	HIF1A	hypoxia inducible factor 1 alpha subunit [Source:HGNC Symbol;Acc:HGNC:4910]	protein_coding	coding	61695513	61748259	14	1	chromosome
ENSG00000159593	1817.85	0.18999	0.0718281	2.6457	0.00815219	0.201893	NAE1	NEDD8 activating enzyme E1 subunit 1 [Source:HGNC Symbol;Acc:HGNC:621]	protein_coding	coding	66802875	66873256	16	-1	chromosome
ENSG00000164638	240.803	-0.345346	0.13021	-2.64524	0.00816329	0.201893	SLC29A4	solute carrier family 29 member 4 [Source:HGNC Symbol;Acc:HGNC:23097]	protein_coding	coding	5274369	5306870	7	1	chromosome
ENSG00000172461	11.3629	0.0958073	0.0514789	2.64679	0.00812603	0.201893	FUT9	fucosyltransferase 9 [Source:HGNC Symbol;Acc:HGNC:4020]	protein_coding	coding	96015984	96215612	6	1	chromosome
ENSG00000104325	499.715	0.275854	0.10448	2.6428	0.00822243	0.202396	DECR1	2,4-dienoyl-CoA reductase 1 [Source:HGNC Symbol;Acc:HGNC:2753]	protein_coding	coding	90001405	90052092	8	1	chromosome
ENSG00000108828	2830.27	-0.210723	0.0797628	-2.64122	0.00826086	0.202396	VAT1	vesicle amine transport 1 [Source:HGNC Symbol;Acc:HGNC:16919]	protein_coding	coding	43014605	43025123	17	-1	chromosome
ENSG00000125450	750.117	0.249915	0.0946424	2.6405	0.00827842	0.202396	NUP85	nucleoporin 85 [Source:HGNC Symbol;Acc:HGNC:8734]	protein_coding	coding	75205659	75235758	17	1	chromosome
ENSG00000141503	666.892	-0.294213	0.111205	-2.64207	0.00824001	0.202396	MINK1	misshapen like kinase 1 [Source:HGNC Symbol;Acc:HGNC:17565]	protein_coding	coding	4833388	4898061	17	1	chromosome
ENSG00000143217	114.379	-0.366809	0.138174	-2.63986	0.00829409	0.202396	NECTIN4	nectin cell adhesion molecule 4 [Source:HGNC Symbol;Acc:HGNC:19688]	protein_coding	coding	161070995	161089599	1	-1	chromosome
ENSG00000166444	350.141	0.365619	0.139203	2.64018	0.00828632	0.202396	ST5	suppression of tumorigenicity 5 [Source:HGNC Symbol;Acc:HGNC:11350]	protein_coding	coding	8693351	8910951	11	-1	chromosome
ENSG00000213516	285.369	-0.323361	0.122321	-2.64089	0.0082689	0.202396	RBMXL1	RNA binding motif protein, X-linked like 1 [Source:HGNC Symbol;Acc:HGNC:25073]	protein_coding	coding	88979456	88992960	1	-1	chromosome
ENSG00000188352	604.801	0.290492	0.110077	2.63852	0.00832687	0.202843	FOCAD	focadhesin [Source:HGNC Symbol;Acc:HGNC:23377]	protein_coding	coding	20658309	20995955	9	1	chromosome
ENSG00000165914	79.1451	0.353269	0.133991	2.63788	0.00834265	0.202874	TTC7B	tetratricopeptide repeat domain 7B [Source:HGNC Symbol;Acc:HGNC:19858]	protein_coding	coding	90524564	90816479	14	-1	chromosome
ENSG00000188157	2394.27	-0.211069	0.0800644	-2.63599	0.00838925	0.203654	AGRN	agrin [Source:HGNC Symbol;Acc:HGNC:329]	protein_coding	coding	1020123	1056118	1	1	chromosome
ENSG00000177084	850.964	-0.301917	0.114613	-2.63454	0.00842516	0.204172	POLE	DNA polymerase epsilon, catalytic subunit [Source:HGNC Symbol;Acc:HGNC:9177]	protein_coding	coding	132623753	132687365	12	-1	chromosome
ENSG00000205086	15.7102	0.168945	0.0747416	2.63314	0.00845987	0.204659	C2orf91	chromosome 2 open reading frame 91 [Source:HGNC Symbol;Acc:HGNC:42966]	protein_coding	coding	41935368	41954266	2	-1	chromosome
ENSG00000104093	403.496	0.365053	0.139429	2.63136	0.00850442	0.204765	DMXL2	Dmx like 2 [Source:HGNC Symbol;Acc:HGNC:2938]	protein_coding	coding	51447711	51622833	15	-1	chromosome
ENSG00000108774	1963.98	-0.22351	0.0849316	-2.63036	0.00852953	0.204765	RAB5C	RAB5C, member RAS oncogene family [Source:HGNC Symbol;Acc:HGNC:9785]	protein_coding	coding	42124976	42155044	17	-1	chromosome
ENSG00000139496	977.96	0.227225	0.0863739	2.63181	0.00849322	0.204765	NUP58	nucleoporin 58 [Source:HGNC Symbol;Acc:HGNC:20261]	protein_coding	coding	25301524	25349800	13	1	chromosome
ENSG00000141959	1563.33	-0.212752	0.0809329	-2.62869	0.00857143	0.204765	PFKL	phosphofructokinase, liver type [Source:HGNC Symbol;Acc:HGNC:8876]	protein_coding	coding	44300051	44327376	21	1	chromosome
ENSG00000162377	618.716	-0.292424	0.111119	-2.63053	0.00852519	0.204765	COA7	cytochrome c oxidase assembly factor 7 (putative) [Source:HGNC Symbol;Acc:HGNC:25716]	protein_coding	coding	52684451	52698366	1	-1	chromosome
ENSG00000164611	729.496	0.236072	0.0898073	2.62858	0.00857415	0.204765	PTTG1	pituitary tumor-transforming 1 [Source:HGNC Symbol;Acc:HGNC:9690]	protein_coding	coding	160421822	160428744	5	1	chromosome
ENSG00000165487	615.618	0.239626	0.0912139	2.6283	0.00858122	0.204765	MICU2	mitochondrial calcium uptake 2 [Source:HGNC Symbol;Acc:HGNC:31830]	protein_coding	coding	21492691	21604214	13	-1	chromosome
ENSG00000178913	1464.86	0.201491	0.0766397	2.62981	0.00854337	0.204765	TAF7	TATA-box binding protein associated factor 7 [Source:HGNC Symbol;Acc:HGNC:11541]	protein_coding	coding	141260225	141320821	5	-1	chromosome
ENSG00000090857	996.23	-0.217852	0.0829205	-2.62607	0.0086377	0.205065	PDPR	pyruvate dehydrogenase phosphatase regulatory subunit [Source:HGNC Symbol;Acc:HGNC:30264]	protein_coding	coding	70113626	70162537	16	1	chromosome
ENSG00000151611	44.1636	-0.354394	0.134773	-2.62703	0.00861342	0.205065	MMAA	methylmalonic aciduria (cobalamin deficiency) cblA type [Source:HGNC Symbol;Acc:HGNC:18871]	protein_coding	coding	145618263	145660035	4	1	chromosome
ENSG00000180185	580.818	-0.282771	0.107539	-2.62628	0.0086324	0.205065	FAHD1	fumarylacetoacetate hydrolase domain containing 1 [Source:HGNC Symbol;Acc:HGNC:14169]	protein_coding	coding	1826941	1840207	16	1	chromosome
ENSG00000165490	212.631	0.334273	0.127474	2.62368	0.00869859	0.205938	DDIAS	DNA damage induced apoptosis suppressor [Source:HGNC Symbol;Acc:HGNC:26351]	protein_coding	coding	82899975	82958277	11	1	chromosome
ENSG00000185813	2219.67	-0.17642	0.0672313	-2.62347	0.00870389	0.205938	PCYT2	phosphate cytidylyltransferase 2, ethanolamine [Source:HGNC Symbol;Acc:HGNC:8756]	protein_coding	coding	81900965	81911464	17	-1	chromosome
ENSG00000123106	197.041	0.335252	0.130231	2.61891	0.00882122	0.208011	CCDC91	coiled-coil domain containing 91 [Source:HGNC Symbol;Acc:HGNC:24855]	protein_coding	coding	28133249	28581511	12	1	chromosome
ENSG00000163584	509.15	0.294453	0.112495	2.619	0.00881878	0.208011	RPL22L1	ribosomal protein L22 like 1 [Source:HGNC Symbol;Acc:HGNC:27610]	protein_coding	coding	170864875	170870483	3	-1	chromosome
ENSG00000140553	637.183	-0.284662	0.108612	-2.6169	0.00887329	0.208888	UNC45A	unc-45 myosin chaperone A [Source:HGNC Symbol;Acc:HGNC:30594]	protein_coding	coding	90930180	90954093	15	1	chromosome
ENSG00000079246	6442.47	-0.181582	0.0694494	-2.61438	0.00893906	0.209326	XRCC5	X-ray repair cross complementing 5 [Source:HGNC Symbol;Acc:HGNC:12833]	protein_coding	coding	216107464	216206303	2	1	chromosome
ENSG00000089063	2494.63	0.181738	0.0694994	2.61485	0.00892675	0.209326	TMEM230	transmembrane protein 230 [Source:HGNC Symbol;Acc:HGNC:15876]	protein_coding	coding	5068232	5113103	20	-1	chromosome
ENSG00000136930	1451.03	-0.208537	0.0796966	-2.6154	0.00891228	0.209326	PSMB7	proteasome subunit beta 7 [Source:HGNC Symbol;Acc:HGNC:9544]	protein_coding	coding	124353466	124415444	9	-1	chromosome
ENSG00000164405	1046.42	0.199101	0.0761853	2.61389	0.00895167	0.209326	UQCRQ	ubiquinol-cytochrome c reductase complex III subunit VII [Source:HGNC Symbol;Acc:HGNC:29594]	protein_coding	coding	132866560	132868031	5	1	chromosome
ENSG00000008277	266.97	0.343655	0.133306	2.61057	0.0090391	0.209546	ADAM22	ADAM metallopeptidase domain 22 [Source:HGNC Symbol;Acc:HGNC:201]	protein_coding	coding	87934143	88202889	7	1	chromosome
ENSG00000108344	1768.07	-0.187559	0.0718177	-2.61097	0.00902865	0.209546	PSMD3	proteasome 26S subunit, non-ATPase 3 [Source:HGNC Symbol;Acc:HGNC:9560]	protein_coding	coding	39980797	39997960	17	1	chromosome
ENSG00000158874	18943.1	-0.167976	0.0643657	-2.6096	0.00906482	0.209546	APOA2	apolipoprotein A2 [Source:HGNC Symbol;Acc:HGNC:601]	protein_coding	coding	161222292	161223631	1	-1	chromosome
ENSG00000172661	612.376	0.286885	0.109915	2.60956	0.00906582	0.209546	WASHC2C	WASH complex subunit 2C [Source:HGNC Symbol;Acc:HGNC:23414]	protein_coding	coding	45727200	45792961	10	1	chromosome
ENSG00000173898	151.49	0.30065	0.118958	2.60983	0.00905861	0.209546	SPTBN2	spectrin beta, non-erythrocytic 2 [Source:HGNC Symbol;Acc:HGNC:11276]	protein_coding	coding	66685248	66729226	11	-1	chromosome
ENSG00000185215	27.1061	0.222237	0.0923436	2.61033	0.0090456	0.209546	TNFAIP2	TNF alpha induced protein 2 [Source:HGNC Symbol;Acc:HGNC:11895]	protein_coding	coding	103123442	103137439	14	1	chromosome
ENSG00000276144	11.483	0.185341	0.0780367	2.61023	0.0090482	0.209546	AC233309.1	NA	lincRNA	noncoding	7115736	7116486	12	-1	chromosome
ENSG00000157107	300.163	0.310031	0.119026	2.60838	0.00909712	0.209923	FCHO2	FCH domain only 2 [Source:HGNC Symbol;Acc:HGNC:25180]	protein_coding	coding	72955981	73090522	5	1	chromosome
ENSG00000164050	1461.49	-0.311249	0.119387	-2.60572	0.00916811	0.211213	PLXNB1	plexin B1 [Source:HGNC Symbol;Acc:HGNC:9103]	protein_coding	coding	48403854	48430051	3	-1	chromosome
ENSG00000166689	413.928	0.296244	0.113763	2.60468	0.009196	0.211508	PLEKHA7	pleckstrin homology domain containing A7 [Source:HGNC Symbol;Acc:HGNC:27049]	protein_coding	coding	16777317	17014443	11	-1	chromosome
ENSG00000116017	1642.52	-0.20164	0.0774659	-2.6024	0.00925743	0.211757	ARID3A	AT-rich interaction domain 3A [Source:HGNC Symbol;Acc:HGNC:3031]	protein_coding	coding	925781	975934	19	1	chromosome
ENSG00000125871	1329.71	0.199884	0.0768446	2.60203	0.00926732	0.211757	MGME1	mitochondrial genome maintenance exonuclease 1 [Source:HGNC Symbol;Acc:HGNC:16205]	protein_coding	coding	17968913	17991122	20	1	chromosome
ENSG00000196419	7136.48	-0.199457	0.0766382	-2.60254	0.00925356	0.211757	XRCC6	X-ray repair cross complementing 6 [Source:HGNC Symbol;Acc:HGNC:4055]	protein_coding	coding	41621119	41664048	22	1	chromosome
ENSG00000205581	3301.23	0.170326	0.065427	2.60339	0.00923079	0.211757	HMGN1	high mobility group nucleosome binding domain 1 [Source:HGNC Symbol;Acc:HGNC:4984]	protein_coding	coding	39342315	39349647	21	-1	chromosome
ENSG00000089091	41.144	0.340111	0.132068	2.59971	0.00933039	0.212851	DZANK1	double zinc ribbon and ankyrin repeat domains 1 [Source:HGNC Symbol;Acc:HGNC:15858]	protein_coding	coding	18383367	18467281	20	-1	chromosome
ENSG00000073578	2323.58	-0.163885	0.063051	-2.59892	0.00935167	0.21299	SDHA	succinate dehydrogenase complex flavoprotein subunit A [Source:HGNC Symbol;Acc:HGNC:10680]	protein_coding	coding	218241	256700	5	1	chromosome
ENSG00000140694	923.487	0.232919	0.0897451	2.59589	0.00943456	0.214181	PARN	poly(A)-specific ribonuclease [Source:HGNC Symbol;Acc:HGNC:8609]	protein_coding	coding	14435701	14632728	16	-1	chromosome
ENSG00000164684	648.07	-0.322177	0.124221	-2.5964	0.0094205	0.214181	ZNF704	zinc finger protein 704 [Source:HGNC Symbol;Acc:HGNC:32291]	protein_coding	coding	80628451	80874781	8	-1	chromosome
ENSG00000265681	9985.36	-0.160513	0.0618973	-2.59305	0.00951292	0.215611	RPL17	ribosomal protein L17 [Source:HGNC Symbol;Acc:HGNC:10307]	protein_coding	coding	49488453	49492523	18	-1	chromosome
ENSG00000120693	136.788	-0.350218	0.135108	-2.5873	0.00967316	0.218183	SMAD9	SMAD family member 9 [Source:HGNC Symbol;Acc:HGNC:6774]	protein_coding	coding	36844831	36920765	13	-1	chromosome
ENSG00000123600	606.785	0.297353	0.115078	2.58794	0.0096553	0.218183	METTL8	methyltransferase like 8 [Source:HGNC Symbol;Acc:HGNC:25856]	protein_coding	coding	171317405	171434802	2	-1	chromosome
ENSG00000213246	1321.52	-0.263881	0.101885	-2.58767	0.00966284	0.218183	SUPT4H1	SPT4 homolog, DSIF elongation factor subunit [Source:HGNC Symbol;Acc:HGNC:11467]	protein_coding	coding	58345175	58353093	17	-1	chromosome
ENSG00000076604	747.341	-0.236415	0.0914066	-2.58494	0.00973953	0.218835	TRAF4	TNF receptor associated factor 4 [Source:HGNC Symbol;Acc:HGNC:12034]	protein_coding	coding	28743984	28750958	17	1	chromosome
ENSG00000152558	9360.77	-0.187066	0.0723698	-2.58461	0.0097489	0.218835	TMEM123	transmembrane protein 123 [Source:HGNC Symbol;Acc:HGNC:30138]	protein_coding	coding	102396332	102470384	11	-1	chromosome
ENSG00000178665	56.6134	0.24247	0.100284	2.58542	0.00972613	0.218835	ZNF713	zinc finger protein 713 [Source:HGNC Symbol;Acc:HGNC:22043]	protein_coding	coding	55887475	55942225	7	1	chromosome
ENSG00000103175	31.203	0.0755184	0.0460147	2.58327	0.00978686	0.219335	WFDC1	WAP four-disulfide core domain 1 [Source:HGNC Symbol;Acc:HGNC:15466]	protein_coding	coding	84294646	84329851	16	1	chromosome
ENSG00000151726	1040.12	0.197784	0.0766107	2.58214	0.00981888	0.219701	ACSL1	acyl-CoA synthetase long chain family member 1 [Source:HGNC Symbol;Acc:HGNC:3569]	protein_coding	coding	184755595	184826818	4	-1	chromosome
ENSG00000179950	987.01	-0.255811	0.0990764	-2.57968	0.00988916	0.220673	PUF60	poly(U) binding splicing factor 60 [Source:HGNC Symbol;Acc:HGNC:17042]	protein_coding	coding	143816344	143829859	8	-1	chromosome
ENSG00000196756	216.978	-0.323038	0.124948	-2.57952	0.0098938	0.220673	SNHG17	small nucleolar RNA host gene 17 [Source:HGNC Symbol;Acc:HGNC:48600]	processed_transcript	other	38420588	38435353	20	-1	chromosome
ENSG00000100311	31.8102	-0.320235	0.125303	-2.57794	0.00993913	0.221331	PDGFB	platelet derived growth factor subunit B [Source:HGNC Symbol;Acc:HGNC:8800]	protein_coding	coding	39223359	39244751	22	-1	chromosome
ENSG00000142512	34.0889	0.0655674	0.0425684	2.57484	0.0100287	0.222266	SIGLEC10	sialic acid binding Ig like lectin 10 [Source:HGNC Symbol;Acc:HGNC:15620]	protein_coding	coding	51410021	51417803	19	-1	chromosome
ENSG00000166123	3166.92	-0.22549	0.0875603	-2.57522	0.0100176	0.222266	GPT2	glutamic--pyruvic transaminase 2 [Source:HGNC Symbol;Acc:HGNC:18062]	protein_coding	coding	46884378	46931297	16	1	chromosome
ENSG00000198431	3329.11	-0.188993	0.0733985	-2.57486	0.0100281	0.222266	TXNRD1	thioredoxin reductase 1 [Source:HGNC Symbol;Acc:HGNC:12437]	protein_coding	coding	104215779	104350305	12	1	chromosome
ENSG00000168137	1196.74	0.229781	0.0892905	2.57404	0.0100518	0.222426	SETD5	SET domain containing 5 [Source:HGNC Symbol;Acc:HGNC:25566]	protein_coding	coding	9397615	9479240	3	1	chromosome
ENSG00000157800	370.696	0.314638	0.122495	2.57107	0.0101386	0.223992	SLC37A3	solute carrier family 37 member 3 [Source:HGNC Symbol;Acc:HGNC:20651]	protein_coding	coding	140293693	140404433	7	-1	chromosome
ENSG00000196230	22811.9	-0.111706	0.0435	-2.5679	0.0102316	0.225691	TUBB	tubulin beta class I [Source:HGNC Symbol;Acc:HGNC:20778]	protein_coding	coding	30720201	30725426	6	1	chromosome
ENSG00000165757	55.1906	0.0789687	0.0474376	2.56681	0.0102638	0.226047	JCAD	junctional cadherin 5 associated [Source:HGNC Symbol;Acc:HGNC:29283]	protein_coding	coding	30012800	30115494	10	-1	chromosome
ENSG00000065150	4401.22	-0.133924	0.0522152	-2.56466	0.0103276	0.22679	IPO5	importin 5 [Source:HGNC Symbol;Acc:HGNC:6402]	protein_coding	coding	97953658	98024297	13	1	chromosome
ENSG00000101945	154.021	-0.342186	0.132852	-2.56433	0.0103374	0.22679	SUV39H1	suppressor of variegation 3-9 homolog 1 [Source:HGNC Symbol;Acc:HGNC:11479]	protein_coding	coding	48695554	48709012	X	1	chromosome
ENSG00000131724	1667.44	0.176419	0.0688204	2.56404	0.0103462	0.22679	IL13RA1	interleukin 13 receptor subunit alpha 1 [Source:HGNC Symbol;Acc:HGNC:5974]	protein_coding	coding	118727572	118794539	X	1	chromosome
ENSG00000142089	654.384	-0.275562	0.107346	-2.56345	0.0103638	0.226821	IFITM3	interferon induced transmembrane protein 3 [Source:HGNC Symbol;Acc:HGNC:5414]	protein_coding	coding	319669	327537	11	-1	chromosome
ENSG00000117682	322.209	-0.32877	0.128124	-2.56022	0.0104605	0.228029	DHDDS	dehydrodolichyl diphosphate synthase subunit [Source:HGNC Symbol;Acc:HGNC:20603]	protein_coding	coding	26432282	26471294	1	1	chromosome
ENSG00000169504	3777.41	0.157961	0.0616897	2.56056	0.0104503	0.228029	CLIC4	chloride intracellular channel 4 [Source:HGNC Symbol;Acc:HGNC:13518]	protein_coding	coding	24745357	24844324	1	1	chromosome
ENSG00000179115	675.298	-0.263565	0.102836	-2.55944	0.0104841	0.228029	FARSA	phenylalanyl-tRNA synthetase alpha subunit [Source:HGNC Symbol;Acc:HGNC:3592]	protein_coding	coding	12922479	12934037	19	-1	chromosome
ENSG00000204815	10.797	0.158217	0.0714716	2.55971	0.0104759	0.228029	TTC25	tetratricopeptide repeat domain 25 [Source:HGNC Symbol;Acc:HGNC:25280]	protein_coding	coding	41930635	41965651	17	1	chromosome
ENSG00000155893	169.467	0.352735	0.13863	2.5583	0.0105185	0.228422	PXYLP1	2-phosphoxylose phosphatase 1 [Source:HGNC Symbol;Acc:HGNC:26303]	protein_coding	coding	141228726	141367753	3	1	chromosome
ENSG00000008324	285.972	0.308267	0.120931	2.55431	0.0106398	0.229633	SS18L2	SS18 like 2 [Source:HGNC Symbol;Acc:HGNC:15593]	protein_coding	coding	42581840	42595114	3	1	chromosome
ENSG00000170100	213.949	-0.344242	0.134832	-2.55447	0.010635	0.229633	ZNF778	zinc finger protein 778 [Source:HGNC Symbol;Acc:HGNC:26479]	protein_coding	coding	89217703	89237071	16	1	chromosome
ENSG00000270757	90.7596	-0.262624	0.107174	-2.5558	0.0105945	0.229633	HSPE1-MOB4	HSPE1-MOB4 readthrough [Source:HGNC Symbol;Acc:HGNC:49184]	protein_coding	coding	197500413	197550726	2	1	chromosome
ENSG00000277053	684.825	0.267646	0.104723	2.55493	0.0106209	0.229633	GTF2IP1	general transcription factor IIi pseudogene 1 [Source:HGNC Symbol;Acc:HGNC:4660]	transcribed_unprocessed_pseudogene	pseudo	75185385	75237696	7	-1	chromosome
ENSG00000111596	752.616	-0.297821	0.116759	-2.55246	0.0106966	0.230403	CNOT2	CCR4-NOT transcription complex subunit 2 [Source:HGNC Symbol;Acc:HGNC:7878]	protein_coding	coding	70242994	70354993	12	1	chromosome
ENSG00000273374	16.6553	0.151955	0.0703955	2.55207	0.0107084	0.230403	AC069222.1	NA	lincRNA	noncoding	99802699	99806058	3	-1	chromosome
ENSG00000140307	485.6	0.269103	0.105487	2.55106	0.0107396	0.230719	GTF2A2	general transcription factor IIA subunit 2 [Source:HGNC Symbol;Acc:HGNC:4647]	protein_coding	coding	59638062	59657541	15	-1	chromosome
ENSG00000112245	8885.33	-0.225688	0.088531	-2.54896	0.0108044	0.231299	PTP4A1	protein tyrosine phosphatase type IVA, member 1 [Source:HGNC Symbol;Acc:HGNC:9634]	protein_coding	coding	63521748	63583587	6	1	chromosome
ENSG00000114127	535.518	0.269892	0.110526	2.54841	0.0108214	0.231299	XRN1	5'-3' exoribonuclease 1 [Source:HGNC Symbol;Acc:HGNC:30654]	protein_coding	coding	142306607	142448062	3	-1	chromosome
ENSG00000124574	329.972	-0.299758	0.117465	-2.54913	0.0107991	0.231299	ABCC10	ATP binding cassette subfamily C member 10 [Source:HGNC Symbol;Acc:HGNC:52]	protein_coding	coding	43427366	43450430	6	1	chromosome
ENSG00000150756	148.132	0.336393	0.132337	2.54752	0.0108491	0.231299	FAM173B	family with sequence similarity 173 member B [Source:HGNC Symbol;Acc:HGNC:27029]	protein_coding	coding	10226330	10249897	5	-1	chromosome
ENSG00000228862	16.7364	0.181534	0.0788362	2.54788	0.0108381	0.231299	AC068389.1	NA	lincRNA	noncoding	60631509	60636271	8	-1	chromosome
ENSG00000084623	2101.49	-0.188495	0.0739848	-2.54692	0.0108677	0.231344	EIF3I	eukaryotic translation initiation factor 3 subunit I [Source:HGNC Symbol;Acc:HGNC:3272]	protein_coding	coding	32221928	32231604	1	1	chromosome
ENSG00000178952	3383.7	-0.132977	0.0522342	-2.54565	0.0109074	0.231837	TUFM	Tu translation elongation factor, mitochondrial [Source:HGNC Symbol;Acc:HGNC:12420]	protein_coding	coding	28842411	28846408	16	-1	chromosome
ENSG00000163807	665.494	0.312402	0.122796	2.54511	0.0109242	0.231841	KIAA1143	KIAA1143 [Source:HGNC Symbol;Acc:HGNC:29198]	protein_coding	coding	44737661	44761662	3	-1	chromosome
ENSG00000137409	1395.73	-0.210426	0.0827321	-2.54266	0.0110012	0.232813	MTCH1	mitochondrial carrier 1 [Source:HGNC Symbol;Acc:HGNC:17586]	protein_coding	coding	36968141	36986298	6	-1	chromosome
ENSG00000156983	198.121	-0.328099	0.128613	-2.54242	0.0110087	0.232813	BRPF1	bromodomain and PHD finger containing 1 [Source:HGNC Symbol;Acc:HGNC:14255]	protein_coding	coding	9731729	9748018	3	1	chromosome
ENSG00000244731	3416.83	-0.173054	0.0680723	-2.54207	0.0110198	0.232813	C4A	complement C4A (Rodgers blood group) [Source:HGNC Symbol;Acc:HGNC:1323]	protein_coding	coding	31982024	32002681	6	1	chromosome
ENSG00000172239	1349.13	0.190914	0.0751325	2.54096	0.0110548	0.2332	PAIP1	poly(A) binding protein interacting protein 1 [Source:HGNC Symbol;Acc:HGNC:16945]	protein_coding	coding	43526267	43557758	5	-1	chromosome
ENSG00000070367	1062.28	0.27669	0.109021	2.54034	0.0110744	0.233262	EXOC5	exocyst complex component 5 [Source:HGNC Symbol;Acc:HGNC:10696]	protein_coding	coding	57200507	57269008	14	-1	chromosome
ENSG00000143748	227.667	0.327805	0.129093	2.53936	0.0111055	0.233565	NVL	nuclear VCP-like [Source:HGNC Symbol;Acc:HGNC:8070]	protein_coding	coding	224227334	224330387	1	-1	chromosome
ENSG00000065559	753.654	0.30283	0.119389	2.53882	0.0111227	0.233577	MAP2K4	mitogen-activated protein kinase kinase 4 [Source:HGNC Symbol;Acc:HGNC:6844]	protein_coding	coding	12020824	12143830	17	1	chromosome
ENSG00000187118	283.332	0.325088	0.128271	2.53757	0.0111624	0.23406	CMC1	C-X9-C motif containing 1 [Source:HGNC Symbol;Acc:HGNC:28783]	protein_coding	coding	28241584	28325142	3	1	chromosome
ENSG00000096746	2414.85	-0.196184	0.0773964	-2.53405	0.0112753	0.23552	HNRNPH3	heterogeneous nuclear ribonucleoprotein H3 [Source:HGNC Symbol;Acc:HGNC:5043]	protein_coding	coding	68331174	68343191	10	1	chromosome
ENSG00000105792	71.7581	0.320599	0.128525	2.53383	0.0112825	0.23552	CFAP69	cilia and flagella associated protein 69 [Source:HGNC Symbol;Acc:HGNC:26107]	protein_coding	coding	90245174	90311063	7	1	chromosome
ENSG00000157617	380.498	0.348436	0.138424	2.53462	0.0112569	0.23552	C2CD2	C2 calcium dependent domain containing 2 [Source:HGNC Symbol;Acc:HGNC:1266]	protein_coding	coding	41885112	41953890	21	-1	chromosome
ENSG00000266028	695.868	0.28742	0.113649	2.53062	0.0113861	0.237329	SRGAP2	SLIT-ROBO Rho GTPase activating protein 2 [Source:HGNC Symbol;Acc:HGNC:19751]	protein_coding	coding	206203345	206464443	1	1	chromosome
ENSG00000196678	438.803	0.255045	0.100879	2.53008	0.0114036	0.23734	ERI2	ERI1 exoribonuclease family member 2 [Source:HGNC Symbol;Acc:HGNC:30541]	protein_coding	coding	20780193	20900349	16	-1	chromosome
ENSG00000109072	1059.3	-0.255019	0.10077	-2.52924	0.0114309	0.237555	VTN	vitronectin [Source:HGNC Symbol;Acc:HGNC:12724]	protein_coding	coding	28367276	28373091	17	-1	chromosome
ENSG00000130368	31.0113	0.056877	0.0394817	2.52851	0.0114548	0.237622	MAS1	MAS1 proto-oncogene, G protein-coupled receptor [Source:HGNC Symbol;Acc:HGNC:6899]	protein_coding	coding	159906690	159916530	6	1	chromosome
ENSG00000214595	534.954	-0.330649	0.130966	-2.5281	0.011468	0.237622	EML6	echinoderm microtubule associated protein like 6 [Source:HGNC Symbol;Acc:HGNC:35412]	protein_coding	coding	54723499	54972025	2	1	chromosome
ENSG00000110583	449.657	-0.317399	0.125835	-2.52622	0.0115297	0.238547	NAA40	N(alpha)-acetyltransferase 40, NatD catalytic subunit [Source:HGNC Symbol;Acc:HGNC:25845]	protein_coding	coding	63938959	63957328	11	1	chromosome
ENSG00000143669	64.2229	0.273847	0.112477	2.52569	0.011547	0.238553	LYST	lysosomal trafficking regulator [Source:HGNC Symbol;Acc:HGNC:1968]	protein_coding	coding	235661041	235883640	1	-1	chromosome
ENSG00000123395	379.631	-0.280873	0.111175	-2.52413	0.0115985	0.238912	ATG101	autophagy related 101 [Source:HGNC Symbol;Acc:HGNC:25679]	protein_coding	coding	52069246	52077494	12	1	chromosome
ENSG00000204843	1991.75	-0.17112	0.0677727	-2.52427	0.0115939	0.238912	DCTN1	dynactin subunit 1 [Source:HGNC Symbol;Acc:HGNC:2711]	protein_coding	coding	74361154	74392087	2	-1	chromosome
ENSG00000138279	1310.17	0.200663	0.0795415	2.52286	0.0116406	0.23929	ANXA7	annexin A7 [Source:HGNC Symbol;Acc:HGNC:545]	protein_coding	coding	73375101	73414076	10	-1	chromosome
ENSG00000196305	2755.13	-0.168773	0.0669075	-2.52203	0.0116681	0.23929	IARS	isoleucyl-tRNA synthetase [Source:HGNC Symbol;Acc:HGNC:5330]	protein_coding	coding	92210207	92293756	9	-1	chromosome
ENSG00000257103	1683.97	-0.191511	0.0759017	-2.52237	0.0116568	0.23929	LSM14A	LSM14A, mRNA processing body assembly factor [Source:HGNC Symbol;Acc:HGNC:24489]	protein_coding	coding	34172504	34229515	19	1	chromosome
ENSG00000109805	1126.34	0.270636	0.107346	2.52067	0.0117133	0.239866	NCAPG	non-SMC condensin I complex subunit G [Source:HGNC Symbol;Acc:HGNC:24304]	protein_coding	coding	17810902	17844862	4	1	chromosome
ENSG00000159692	1039.8	-0.291061	0.115526	-2.51785	0.0118073	0.241087	CTBP1	C-terminal binding protein 1 [Source:HGNC Symbol;Acc:HGNC:2494]	protein_coding	coding	1211448	1249953	4	-1	chromosome
ENSG00000165688	992.788	-0.234562	0.0931084	-2.51794	0.0118042	0.241087	PMPCA	peptidase, mitochondrial processing alpha subunit [Source:HGNC Symbol;Acc:HGNC:18667]	protein_coding	coding	136410570	136423761	9	1	chromosome
ENSG00000258677	13.8293	-0.129555	0.0667555	-2.51611	0.0118659	0.24193	AC022826.2	NA	protein_coding	coding	73688691	73878854	8	-1	chromosome
ENSG00000258644	53.0782	0.341677	0.136705	2.51534	0.0118917	0.242103	SYNJ2BP-COX16	SYNJ2BP-COX16 readthrough [Source:HGNC Symbol;Acc:HGNC:48350]	protein_coding	coding	70326064	70417074	14	-1	chromosome
ENSG00000146386	120.354	0.341488	0.135725	2.51472	0.0119129	0.242182	ABRACL	ABRA C-terminal like [Source:HGNC Symbol;Acc:HGNC:21230]	protein_coding	coding	139028682	139043302	6	1	chromosome
ENSG00000008988	6072.96	0.172219	0.0685021	2.51398	0.0119379	0.242338	RPS20	ribosomal protein S20 [Source:HGNC Symbol;Acc:HGNC:10405]	protein_coding	coding	56067295	56074581	8	-1	chromosome
ENSG00000004139	13.6216	-0.232031	0.096088	-2.50972	0.0120828	0.242796	SARM1	sterile alpha and TIR motif containing 1 [Source:HGNC Symbol;Acc:HGNC:17074]	protein_coding	coding	28364356	28404049	17	1	chromosome
ENSG00000074695	4566.25	0.153674	0.0612035	2.51102	0.0120382	0.242796	LMAN1	lectin, mannose binding 1 [Source:HGNC Symbol;Acc:HGNC:6631]	protein_coding	coding	59327823	59359962	18	-1	chromosome
ENSG00000082781	1447.91	-0.272286	0.108359	-2.51055	0.0120544	0.242796	ITGB5	integrin subunit beta 5 [Source:HGNC Symbol;Acc:HGNC:6160]	protein_coding	coding	124761948	124901418	3	-1	chromosome
ENSG00000102898	1500.85	-0.211933	0.0844481	-2.50869	0.0121181	0.242796	NUTF2	nuclear transport factor 2 [Source:HGNC Symbol;Acc:HGNC:13722]	protein_coding	coding	67846732	67872567	16	1	chromosome
ENSG00000115514	754.406	0.245403	0.0978586	2.50907	0.012105	0.242796	TXNDC9	thioredoxin domain containing 9 [Source:HGNC Symbol;Acc:HGNC:24110]	protein_coding	coding	99318982	99340702	2	-1	chromosome
ENSG00000130985	2684.46	-0.211975	0.0843526	-2.51212	0.012001	0.242796	UBA1	ubiquitin like modifier activating enzyme 1 [Source:HGNC Symbol;Acc:HGNC:12469]	protein_coding	coding	47190861	47215128	X	1	chromosome
ENSG00000171444	93.7142	0.258719	0.107817	2.51113	0.0120345	0.242796	MCC	mutated in colorectal cancers [Source:HGNC Symbol;Acc:HGNC:6935]	protein_coding	coding	113022099	113488830	5	-1	chromosome
ENSG00000181852	290.7	-0.291459	0.116016	-2.50823	0.0121338	0.242796	RNF41	ring finger protein 41 [Source:HGNC Symbol;Acc:HGNC:18401]	protein_coding	coding	56202175	56221933	12	-1	chromosome
ENSG00000196455	462.316	0.331696	0.132332	2.50947	0.0120912	0.242796	PIK3R4	phosphoinositide-3-kinase regulatory subunit 4 [Source:HGNC Symbol;Acc:HGNC:8982]	protein_coding	coding	130678935	130746829	3	-1	chromosome
ENSG00000214765	129.126	0.339992	0.135368	2.51041	0.0120591	0.242796	SEPT7P2	septin 7 pseudogene 2 [Source:HGNC Symbol;Acc:HGNC:32339]	transcribed_unprocessed_pseudogene	pseudo	45723780	45768985	7	-1	chromosome
ENSG00000159082	153.421	0.319492	0.129464	2.50687	0.0121804	0.243383	SYNJ1	synaptojanin 1 [Source:HGNC Symbol;Acc:HGNC:11503]	protein_coding	coding	32628759	32728048	21	-1	chromosome
ENSG00000113742	309.451	-0.310321	0.123769	-2.50313	0.01231	0.243464	CPEB4	cytoplasmic polyadenylation element binding protein 4 [Source:HGNC Symbol;Acc:HGNC:21747]	protein_coding	coding	173888280	173961976	5	1	chromosome
ENSG00000114353	828.457	-0.23388	0.0933762	-2.50333	0.012303	0.243464	GNAI2	G protein subunit alpha i2 [Source:HGNC Symbol;Acc:HGNC:4385]	protein_coding	coding	50226292	50259355	3	1	chromosome
ENSG00000135482	49.4113	0.343102	0.137222	2.50375	0.0122886	0.243464	ZC3H10	zinc finger CCCH-type containing 10 [Source:HGNC Symbol;Acc:HGNC:25893]	protein_coding	coding	56118159	56127514	12	1	chromosome
ENSG00000151304	178.019	0.318843	0.127682	2.50274	0.0123236	0.243464	SRFBP1	serum response factor binding protein 1 [Source:HGNC Symbol;Acc:HGNC:26333]	protein_coding	coding	121961961	122075570	5	1	chromosome
ENSG00000158769	1695.27	-0.298934	0.119276	-2.50539	0.0122316	0.243464	F11R	F11 receptor [Source:HGNC Symbol;Acc:HGNC:14685]	protein_coding	coding	160995211	161021348	1	-1	chromosome
ENSG00000181458	388.894	0.287794	0.115075	2.50482	0.0122512	0.243464	TMEM45A	transmembrane protein 45A [Source:HGNC Symbol;Acc:HGNC:25480]	protein_coding	coding	100492619	100577444	3	1	chromosome
ENSG00000204070	536.362	-0.252388	0.100757	-2.50299	0.0123148	0.243464	SYS1	SYS1, golgi trafficking protein [Source:HGNC Symbol;Acc:HGNC:16162]	protein_coding	coding	45361937	45376798	20	1	chromosome
ENSG00000263136	357.204	0.299229	0.119479	2.50592	0.0122135	0.243464	NA	NA	NA	NA	NA	NA	NA	NA	NA
ENSG00000100219	4045.44	0.173146	0.0692108	2.50157	0.0123643	0.243925	XBP1	X-box binding protein 1 [Source:HGNC Symbol;Acc:HGNC:12801]	protein_coding	coding	28794555	28800597	22	-1	chromosome
ENSG00000102226	609.726	-0.255001	0.101951	-2.49949	0.0124373	0.24497	USP11	ubiquitin specific peptidase 11 [Source:HGNC Symbol;Acc:HGNC:12609]	protein_coding	coding	47232690	47248328	X	1	chromosome
ENSG00000136718	1009.72	-0.219897	0.0879272	-2.49906	0.0124522	0.24497	IMP4	IMP4, U3 small nucleolar ribonucleoprotein [Source:HGNC Symbol;Acc:HGNC:30856]	protein_coding	coding	130342225	130347810	2	1	chromosome
ENSG00000164406	105.22	0.346979	0.139008	2.49699	0.0125254	0.245838	LEAP2	liver enriched antimicrobial peptide 2 [Source:HGNC Symbol;Acc:HGNC:29571]	protein_coding	coding	132872322	132875046	5	1	chromosome
ENSG00000196275	40.0405	0.193155	0.0848427	2.49681	0.0125315	0.245838	GTF2IRD2	GTF2I repeat domain containing 2 [Source:HGNC Symbol;Acc:HGNC:30775]	protein_coding	coding	74796144	74851551	7	-1	chromosome
ENSG00000143761	3059.68	-0.155236	0.0622322	-2.49425	0.0126225	0.247099	ARF1	ADP ribosylation factor 1 [Source:HGNC Symbol;Acc:HGNC:652]	protein_coding	coding	228082660	228099212	1	1	chromosome
ENSG00000173660	2269.18	-0.181961	0.0729365	-2.49401	0.012631	0.247099	UQCRH	ubiquinol-cytochrome c reductase hinge protein [Source:HGNC Symbol;Acc:HGNC:12590]	protein_coding	coding	46303631	46316776	1	1	chromosome
ENSG00000177302	448.317	0.301006	0.120975	2.49322	0.0126589	0.247298	TOP3A	topoisomerase (DNA) III alpha [Source:HGNC Symbol;Acc:HGNC:11992]	protein_coding	coding	18271428	18315007	17	-1	chromosome
ENSG00000139180	721.845	-0.212722	0.0853321	-2.4915	0.0127206	0.248158	NDUFA9	NADH:ubiquinone oxidoreductase subunit A9 [Source:HGNC Symbol;Acc:HGNC:7693]	protein_coding	coding	4649095	4694317	12	1	chromosome
ENSG00000115977	358.348	0.305193	0.122836	2.48957	0.0127899	0.248502	AAK1	AP2 associated kinase 1 [Source:HGNC Symbol;Acc:HGNC:19679]	protein_coding	coding	69457997	69674349	2	-1	chromosome
ENSG00000171612	1092.45	0.197441	0.0792979	2.49018	0.012768	0.248502	SLC25A33	solute carrier family 25 member 33 [Source:HGNC Symbol;Acc:HGNC:29681]	protein_coding	coding	9539482	9585179	1	1	chromosome
ENSG00000187764	31.2977	0.290346	0.118834	2.48952	0.0127915	0.248502	SEMA4D	semaphorin 4D [Source:HGNC Symbol;Acc:HGNC:10732]	protein_coding	coding	89360787	89498130	9	-1	chromosome
ENSG00000165868	325.104	-0.272807	0.109607	-2.48523	0.0129466	0.25082	HSPA12A	heat shock protein family A (Hsp70) member 12A [Source:HGNC Symbol;Acc:HGNC:19022]	protein_coding	coding	116671192	116849741	10	-1	chromosome
ENSG00000213339	292.25	-0.300663	0.120764	-2.48567	0.0129307	0.25082	QTRT1	queuine tRNA-ribosyltransferase catalytic subunit 1 [Source:HGNC Symbol;Acc:HGNC:23797]	protein_coding	coding	10701430	10713437	19	1	chromosome
ENSG00000039319	751.753	-0.257299	0.10366	-2.48059	0.0131166	0.252608	ZFYVE16	zinc finger FYVE-type containing 16 [Source:HGNC Symbol;Acc:HGNC:20756]	protein_coding	coding	80408013	80479350	5	1	chromosome
ENSG00000113645	367.835	0.311039	0.125662	2.48036	0.0131251	0.252608	WWC1	WW and C2 domain containing 1 [Source:HGNC Symbol;Acc:HGNC:29435]	protein_coding	coding	168291651	168472303	5	1	chromosome
ENSG00000125844	6700.1	0.120593	0.0486041	2.4812	0.013094	0.252608	RRBP1	ribosome binding protein 1 [Source:HGNC Symbol;Acc:HGNC:10448]	protein_coding	coding	17613678	17682295	20	-1	chromosome
ENSG00000165280	5179.46	-0.141854	0.0571666	-2.4812	0.013094	0.252608	VCP	valosin containing protein [Source:HGNC Symbol;Acc:HGNC:12666]	protein_coding	coding	35056064	35073249	9	-1	chromosome
ENSG00000182512	956.542	0.220703	0.0890107	2.48025	0.0131291	0.252608	GLRX5	glutaredoxin 5 [Source:HGNC Symbol;Acc:HGNC:20134]	protein_coding	coding	95533503	95544724	14	1	chromosome
ENSG00000087191	1630.66	-0.204419	0.0825632	-2.47473	0.0133335	0.254965	PSMC5	proteasome 26S subunit, ATPase 5 [Source:HGNC Symbol;Acc:HGNC:9552]	protein_coding	coding	63827152	63832026	17	1	chromosome
ENSG00000092847	746.812	-0.229811	0.0929322	-2.47255	0.0134154	0.254965	AGO1	argonaute 1, RISC catalytic component [Source:HGNC Symbol;Acc:HGNC:3262]	protein_coding	coding	35869808	35930528	1	1	chromosome
ENSG00000143622	166.882	0.324718	0.1315	2.47589	0.0132904	0.254965	RIT1	Ras like without CAAX 1 [Source:HGNC Symbol;Acc:HGNC:10023]	protein_coding	coding	155897808	155911404	1	-1	chromosome
ENSG00000154803	299.506	-0.294777	0.118957	-2.47278	0.0134068	0.254965	FLCN	folliculin [Source:HGNC Symbol;Acc:HGNC:27310]	protein_coding	coding	17212212	17237188	17	-1	chromosome
ENSG00000165995	21.8207	0.248614	0.103433	2.47277	0.0134071	0.254965	CACNB2	calcium voltage-gated channel auxiliary subunit beta 2 [Source:HGNC Symbol;Acc:HGNC:1402]	protein_coding	coding	18140677	18541869	10	1	chromosome
ENSG00000166707	24.5575	0.142753	0.069128	2.47267	0.0134109	0.254965	ZCCHC18	zinc finger CCHC-type containing 18 [Source:HGNC Symbol;Acc:HGNC:32459]	protein_coding	coding	104112131	104115846	X	1	chromosome
ENSG00000166974	1182.91	-0.190211	0.0767968	-2.47579	0.0132941	0.254965	MAPRE2	microtubule associated protein RP/EB family member 2 [Source:HGNC Symbol;Acc:HGNC:6891]	protein_coding	coding	34976928	35143470	18	1	chromosome
ENSG00000179240	81.5844	0.340075	0.137489	2.47258	0.0134141	0.254965	AP002360.1	NA	protein_coding	coding	76381313	76414619	11	1	chromosome
ENSG00000214827	58.6712	0.313636	0.128699	2.47382	0.0133677	0.254965	MTCP1	mature T-cell proliferation 1 [Source:HGNC Symbol;Acc:HGNC:7423]	protein_coding	coding	155061622	155147937	X	-1	chromosome
ENSG00000170160	21.8125	-0.262542	0.108406	-2.47072	0.0134842	0.255925	CCDC144A	coiled-coil domain containing 144A [Source:HGNC Symbol;Acc:HGNC:29072]	protein_coding	coding	16689537	16777881	17	1	chromosome
ENSG00000042429	534.339	0.247285	0.100239	2.46917	0.0135426	0.256023	MED17	mediator complex subunit 17 [Source:HGNC Symbol;Acc:HGNC:2375]	protein_coding	coding	93784227	93814963	11	1	chromosome
ENSG00000134899	456.218	0.308558	0.125182	2.46993	0.0135141	0.256023	ERCC5	ERCC excision repair 5, endonuclease [Source:HGNC Symbol;Acc:HGNC:3437]	protein_coding	coding	102844844	102876001	13	1	chromosome
ENSG00000174990	863.304	-0.279763	0.113145	-2.46913	0.0135442	0.256023	CA5A	carbonic anhydrase 5A [Source:HGNC Symbol;Acc:HGNC:1377]	protein_coding	coding	87881546	87936529	16	-1	chromosome
ENSG00000131473	4702.7	-0.150099	0.0608397	-2.46685	0.0136307	0.25662	ACLY	ATP citrate lyase [Source:HGNC Symbol;Acc:HGNC:115]	protein_coding	coding	41866908	41930542	17	-1	chromosome
ENSG00000164466	1008.31	-0.200016	0.0810569	-2.46727	0.0136149	0.25662	SFXN1	sideroflexin 1 [Source:HGNC Symbol;Acc:HGNC:16085]	protein_coding	coding	175477062	175529742	5	1	chromosome
ENSG00000175183	192.192	0.341251	0.138684	2.4674	0.0136097	0.25662	CSRP2	cysteine and glycine rich protein 2 [Source:HGNC Symbol;Acc:HGNC:2470]	protein_coding	coding	76858715	76879060	12	-1	chromosome
ENSG00000071242	24.9159	0.132274	0.0653063	2.46497	0.0137026	0.257317	RPS6KA2	ribosomal protein S6 kinase A2 [Source:HGNC Symbol;Acc:HGNC:10431]	protein_coding	coding	166409364	166906451	6	-1	chromosome
ENSG00000083457	274.733	0.320189	0.130365	2.46396	0.0137412	0.257317	ITGAE	integrin subunit alpha E [Source:HGNC Symbol;Acc:HGNC:6147]	protein_coding	coding	3714628	3801243	17	-1	chromosome
ENSG00000131778	2007.34	0.15561	0.063141	2.46454	0.0137189	0.257317	CHD1L	chromodomain helicase DNA binding protein 1 like [Source:HGNC Symbol;Acc:HGNC:1916]	protein_coding	coding	147242641	147295766	1	1	chromosome
ENSG00000147874	1014.78	0.31767	0.129072	2.46429	0.0137286	0.257317	HAUS6	HAUS augmin like complex subunit 6 [Source:HGNC Symbol;Acc:HGNC:25948]	protein_coding	coding	19053143	19103119	9	-1	chromosome
ENSG00000166401	22.4509	-0.272841	0.112629	-2.4627	0.0137895	0.257877	SERPINB8	serpin family B member 8 [Source:HGNC Symbol;Acc:HGNC:8952]	protein_coding	coding	63969925	64019779	18	1	chromosome
ENSG00000156136	474.523	0.275903	0.112153	2.45968	0.013906	0.259227	DCK	deoxycytidine kinase [Source:HGNC Symbol;Acc:HGNC:2704]	protein_coding	coding	70992538	71030914	4	1	chromosome
ENSG00000196205	35.247	-0.297386	0.12112	-2.45939	0.0139173	0.259227	EEF1A1P5	eukaryotic translation elongation factor 1 alpha 1 pseudogene 5 [Source:HGNC Symbol;Acc:HGNC:3200]	processed_pseudogene	pseudo	133019486	133020874	9	1	chromosome
ENSG00000225828	95.9845	0.317087	0.131024	2.45945	0.0139149	0.259227	FAM229A	family with sequence similarity 229 member A [Source:HGNC Symbol;Acc:HGNC:44652]	protein_coding	coding	32361270	32364278	1	-1	chromosome
ENSG00000066777	1046.07	0.29128	0.12128	2.45786	0.0139769	0.259993	ARFGEF1	ADP ribosylation factor guanine nucleotide exchange factor 1 [Source:HGNC Symbol;Acc:HGNC:15772]	protein_coding	coding	67173511	67343677	8	-1	chromosome
ENSG00000125459	299.439	-0.307482	0.124973	-2.45671	0.0140216	0.260478	MSTO1	misato 1, mitochondrial distribution and morphology regulator [Source:HGNC Symbol;Acc:HGNC:29678]	protein_coding	coding	155610205	155614967	1	1	chromosome
ENSG00000088808	175.412	-0.340923	0.138633	-2.45402	0.0141269	0.261049	PPP1R13B	protein phosphatase 1 regulatory subunit 13B [Source:HGNC Symbol;Acc:HGNC:14950]	protein_coding	coding	103733752	103847590	14	-1	chromosome
ENSG00000104613	944.923	0.226771	0.0924025	2.45428	0.0141166	0.261049	INTS10	integrator complex subunit 10 [Source:HGNC Symbol;Acc:HGNC:25548]	protein_coding	coding	19817140	19852083	8	1	chromosome
ENSG00000165669	291.06	0.283505	0.115633	2.45467	0.0141016	0.261049	FAM204A	family with sequence similarity 204 member A [Source:HGNC Symbol;Acc:HGNC:25794]	protein_coding	coding	118297930	118342328	10	-1	chromosome
ENSG00000198380	2663.94	0.164946	0.0671836	2.45539	0.014073	0.261049	GFPT1	glutamine--fructose-6-phosphate transaminase 1 [Source:HGNC Symbol;Acc:HGNC:4241]	protein_coding	coding	69319769	69387254	2	-1	chromosome
ENSG00000117054	1062.06	0.19548	0.0797054	2.45258	0.0141834	0.261748	ACADM	acyl-CoA dehydrogenase, C-4 to C-12 straight chain [Source:HGNC Symbol;Acc:HGNC:89]	protein_coding	coding	75724347	75787575	1	1	chromosome
ENSG00000176809	64.5567	0.27044	0.114401	2.45139	0.0142307	0.262275	LRRC37A3	leucine rich repeat containing 37 member A3 [Source:HGNC Symbol;Acc:HGNC:32427]	protein_coding	coding	64854312	64919480	17	-1	chromosome
ENSG00000128510	41.6629	0.295041	0.121016	2.44972	0.0142967	0.2628	CPA4	carboxypeptidase A4 [Source:HGNC Symbol;Acc:HGNC:15740]	protein_coding	coding	130293134	130324180	7	1	chromosome
ENSG00000166833	887.648	-0.290868	0.118547	-2.45016	0.0142795	0.2628	NAV2	neuron navigator 2 [Source:HGNC Symbol;Acc:HGNC:15997]	protein_coding	coding	19350724	20121598	11	1	chromosome
ENSG00000135900	929.324	0.222611	0.0909298	2.44818	0.0143579	0.263184	MRPL44	mitochondrial ribosomal protein L44 [Source:HGNC Symbol;Acc:HGNC:16650]	protein_coding	coding	223957404	223967714	2	1	chromosome
ENSG00000137955	2029.55	-0.167006	0.0682701	-2.4459	0.0144491	0.263184	RABGGTB	Rab geranylgeranyltransferase beta subunit [Source:HGNC Symbol;Acc:HGNC:9796]	protein_coding	coding	75786197	75795079	1	1	chromosome
ENSG00000158828	281.448	0.317716	0.130143	2.44673	0.0144157	0.263184	PINK1	PTEN induced putative kinase 1 [Source:HGNC Symbol;Acc:HGNC:14581]	protein_coding	coding	20633455	20651511	1	1	chromosome
ENSG00000172216	245.897	0.310003	0.127056	2.44606	0.0144426	0.263184	CEBPB	CCAAT/enhancer binding protein beta [Source:HGNC Symbol;Acc:HGNC:1834]	protein_coding	coding	50190734	50192689	20	1	chromosome
ENSG00000182325	233.939	0.325307	0.133351	2.44761	0.0143809	0.263184	FBXL6	F-box and leucine rich repeat protein 6 [Source:HGNC Symbol;Acc:HGNC:13603]	protein_coding	coding	144355431	144359376	8	-1	chromosome
ENSG00000184402	578.36	-0.250758	0.10234	-2.44713	0.0144	0.263184	SS18L1	SS18L1, nBAF chromatin remodeling complex subunit [Source:HGNC Symbol;Acc:HGNC:15592]	protein_coding	coding	62143795	62182484	20	1	chromosome
ENSG00000261189	88.6191	0.341597	0.139416	2.44658	0.0144219	0.263184	AL031058.1	NA	antisense_RNA	other	7540451	7541338	6	-1	chromosome
ENSG00000169696	2076.98	0.204614	0.0837826	2.44196	0.0146076	0.265726	ASPSCR1	ASPSCR1, UBX domain containing tether for SLC2A4 [Source:HGNC Symbol;Acc:HGNC:13825]	protein_coding	coding	81976807	82017406	17	1	chromosome
ENSG00000119703	47.0801	0.325378	0.133975	2.43895	0.0147298	0.26704	ZC2HC1C	zinc finger C2HC-type containing 1C [Source:HGNC Symbol;Acc:HGNC:20354]	protein_coding	coding	75064170	75079987	14	1	chromosome
ENSG00000140367	568.208	0.244441	0.100312	2.43828	0.0147571	0.26704	UBE2Q2	ubiquitin conjugating enzyme E2 Q2 [Source:HGNC Symbol;Acc:HGNC:19248]	protein_coding	coding	75843285	75901078	15	1	chromosome
ENSG00000150753	4905.64	-0.19511	0.0800127	-2.43799	0.0147693	0.26704	CCT5	chaperonin containing TCP1 subunit 5 [Source:HGNC Symbol;Acc:HGNC:1618]	protein_coding	coding	10249921	10266412	5	1	chromosome
ENSG00000162729	344.906	-0.277675	0.113661	-2.43896	0.0147297	0.26704	IGSF8	immunoglobulin superfamily member 8 [Source:HGNC Symbol;Acc:HGNC:17813]	protein_coding	coding	160091340	160098943	1	-1	chromosome
ENSG00000224831	18.4173	-0.166526	0.0757491	-2.43784	0.0147752	0.26704	AC117395.2	NA	processed_pseudogene	pseudo	149982181	149983308	3	-1	chromosome
ENSG00000157978	211.42	-0.307235	0.125809	-2.43631	0.014838	0.26783	LDLRAP1	low density lipoprotein receptor adaptor protein 1 [Source:HGNC Symbol;Acc:HGNC:18640]	protein_coding	coding	25543580	25568886	1	1	chromosome
ENSG00000158373	24.7779	-0.275543	0.116965	-2.4353	0.0148795	0.268233	HIST1H2BD	histone cluster 1 H2B family member d [Source:HGNC Symbol;Acc:HGNC:4747]	protein_coding	coding	26158146	26171349	6	1	chromosome
ENSG00000154781	175.253	0.333373	0.137196	2.43428	0.0149213	0.268641	CCDC174	coiled-coil domain containing 174 [Source:HGNC Symbol;Acc:HGNC:28033]	protein_coding	coding	14651746	14672659	3	1	chromosome
ENSG00000126777	3810.39	0.165453	0.0680313	2.43206	0.0150131	0.268912	KTN1	kinectin 1 [Source:HGNC Symbol;Acc:HGNC:6467]	protein_coding	coding	55559072	55701526	14	1	chromosome
ENSG00000128159	290.531	-0.314706	0.129042	-2.43307	0.0149713	0.268912	TUBGCP6	tubulin gamma complex associated protein 6 [Source:HGNC Symbol;Acc:HGNC:18127]	protein_coding	coding	50217689	50244992	22	-1	chromosome
ENSG00000136859	35.7165	-0.245138	0.107074	-2.43249	0.0149955	0.268912	ANGPTL2	angiopoietin like 2 [Source:HGNC Symbol;Acc:HGNC:490]	protein_coding	coding	127087332	127122883	9	-1	chromosome
ENSG00000251661	19.8147	0.277954	0.114456	2.43276	0.0149841	0.268912	AC136475.1	NA	antisense_RNA	other	318640	325631	11	1	chromosome
ENSG00000104408	5316.06	0.162122	0.0666746	2.43148	0.0150373	0.269	EIF3E	eukaryotic translation initiation factor 3 subunit E [Source:HGNC Symbol;Acc:HGNC:3277]	protein_coding	coding	108201216	108435333	8	-1	chromosome
ENSG00000151576	525.379	0.312368	0.128808	2.42898	0.0151414	0.270517	QTRT2	queuine tRNA-ribosyltransferase accessory subunit 2 [Source:HGNC Symbol;Acc:HGNC:25771]	protein_coding	coding	114005833	114088422	3	1	chromosome
ENSG00000023734	1663.47	0.206029	0.0848916	2.42656	0.0152428	0.271118	STRAP	serine/threonine kinase receptor associated protein [Source:HGNC Symbol;Acc:HGNC:30796]	protein_coding	coding	15882391	15903478	12	1	chromosome
ENSG00000088682	475.381	-0.255916	0.10534	-2.42708	0.0152208	0.271118	COQ9	coenzyme Q9 [Source:HGNC Symbol;Acc:HGNC:25302]	protein_coding	coding	57447425	57461275	16	1	chromosome
ENSG00000105669	862.554	-0.247049	0.101701	-2.42664	0.0152394	0.271118	COPE	coatomer protein complex subunit epsilon [Source:HGNC Symbol;Acc:HGNC:2234]	protein_coding	coding	18899514	18919397	19	-1	chromosome
ENSG00000128050	5591.89	0.16359	0.06743	2.42603	0.0152652	0.271118	PAICS	phosphoribosylaminoimidazole carboxylase and phosphoribosylaminoimidazolesuccinocarboxamide synthase [Source:HGNC Symbol;Acc:HGNC:8587]	protein_coding	coding	56435741	56464579	4	1	chromosome
ENSG00000137177	1028.84	0.231982	0.0956877	2.42587	0.0152718	0.271118	KIF13A	kinesin family member 13A [Source:HGNC Symbol;Acc:HGNC:14566]	protein_coding	coding	17759183	17987623	6	-1	chromosome
ENSG00000067225	8625.05	-0.170993	0.070534	-2.42411	0.0153459	0.272088	PKM	pyruvate kinase, muscle [Source:HGNC Symbol;Acc:HGNC:9021]	protein_coding	coding	72199029	72231822	15	-1	chromosome
ENSG00000077380	1570.14	0.158015	0.0652219	2.423	0.015393	0.272235	DYNC1I2	dynein cytoplasmic 1 intermediate chain 2 [Source:HGNC Symbol;Acc:HGNC:2964]	protein_coding	coding	171687409	171748420	2	1	chromosome
ENSG00000176953	695.791	-0.240267	0.099059	-2.42339	0.0153764	0.272235	NFATC2IP	nuclear factor of activated T-cells 2 interacting protein [Source:HGNC Symbol;Acc:HGNC:25906]	protein_coding	coding	28950807	28967097	16	1	chromosome
ENSG00000112339	1209.68	0.217254	0.0897347	2.4217	0.0154483	0.272524	HBS1L	HBS1 like translational GTPase [Source:HGNC Symbol;Acc:HGNC:4834]	protein_coding	coding	134960378	135103056	6	-1	chromosome
ENSG00000272888	341.666	0.297442	0.123021	2.42194	0.015438	0.272524	LINC01578	long intergenic non-protein coding RNA 1578 [Source:HGNC Symbol;Acc:HGNC:48626]	processed_transcript	other	92882707	92899701	15	1	chromosome
ENSG00000197136	637.424	-0.245885	0.10152	-2.4207	0.0154908	0.272931	PCNX3	pecanex homolog 3 [Source:HGNC Symbol;Acc:HGNC:18760]	protein_coding	coding	65615773	65637439	11	1	chromosome
ENSG00000100629	107.57	0.333557	0.137451	2.41681	0.0156573	0.273798	CEP128	centrosomal protein 128 [Source:HGNC Symbol;Acc:HGNC:20359]	protein_coding	coding	80476983	80959517	14	-1	chromosome
ENSG00000108883	2232.15	-0.224327	0.0928273	-2.41714	0.015643	0.273798	EFTUD2	elongation factor Tu GTP binding domain containing 2 [Source:HGNC Symbol;Acc:HGNC:30858]	protein_coding	coding	44849943	44899662	17	-1	chromosome
ENSG00000140474	177.976	-0.335451	0.138014	-2.41763	0.015622	0.273798	ULK3	unc-51 like kinase 3 [Source:HGNC Symbol;Acc:HGNC:19703]	protein_coding	coding	74836116	74843346	15	-1	chromosome
ENSG00000159335	492.766	-0.303169	0.125164	-2.41823	0.0155961	0.273798	PTMS	parathymosin [Source:HGNC Symbol;Acc:HGNC:9629]	protein_coding	coding	6765516	6770952	12	1	chromosome
ENSG00000159461	1119.59	0.291333	0.120655	2.41716	0.0156422	0.273798	AMFR	autocrine motility factor receptor [Source:HGNC Symbol;Acc:HGNC:463]	protein_coding	coding	56361452	56425538	16	-1	chromosome
ENSG00000179406	123.157	-0.335563	0.139247	-2.41745	0.0156298	0.273798	LINC00174	long intergenic non-protein coding RNA 174 [Source:HGNC Symbol;Acc:HGNC:27788]	processed_transcript	other	66376044	66493566	7	-1	chromosome
ENSG00000182504	108.166	0.322052	0.134415	2.41617	0.0156847	0.273935	CEP97	centrosomal protein 97 [Source:HGNC Symbol;Acc:HGNC:26244]	protein_coding	coding	101723925	101770562	3	1	chromosome
ENSG00000010322	505.604	-0.248824	0.10301	-2.41513	0.0157298	0.273992	NISCH	nischarin [Source:HGNC Symbol;Acc:HGNC:18006]	protein_coding	coding	52455118	52493071	3	1	chromosome
ENSG00000119596	727.836	-0.253818	0.105028	-2.41363	0.0157944	0.273992	YLPM1	YLP motif containing 1 [Source:HGNC Symbol;Acc:HGNC:17798]	protein_coding	coding	74763366	74859435	14	1	chromosome
ENSG00000126088	1014.29	-0.202399	0.0838527	-2.4131	0.0158175	0.273992	UROD	uroporphyrinogen decarboxylase [Source:HGNC Symbol;Acc:HGNC:12591]	protein_coding	coding	45012147	45015575	1	1	chromosome
ENSG00000134049	1002.96	0.211576	0.0877084	2.41251	0.0158431	0.273992	IER3IP1	immediate early response 3 interacting protein 1 [Source:HGNC Symbol;Acc:HGNC:18550]	protein_coding	coding	47152834	47176374	18	-1	chromosome
ENSG00000145868	497.668	0.27793	0.115392	2.41225	0.0158543	0.273992	FBXO38	F-box protein 38 [Source:HGNC Symbol;Acc:HGNC:28844]	protein_coding	coding	148383935	148442836	5	1	chromosome
ENSG00000154582	700.072	-0.215331	0.0891806	-2.41319	0.0158134	0.273992	ELOC	elongin C [Source:HGNC Symbol;Acc:HGNC:11617]	protein_coding	coding	73939169	73972287	8	-1	chromosome
ENSG00000164300	800.689	0.266558	0.110688	2.41113	0.0159032	0.273992	SERINC5	serine incorporator 5 [Source:HGNC Symbol;Acc:HGNC:18825]	protein_coding	coding	80111651	80256079	5	-1	chromosome
ENSG00000168275	516.543	0.23628	0.0978458	2.41507	0.015732	0.273992	COA6	cytochrome c oxidase assembly factor 6 [Source:HGNC Symbol;Acc:HGNC:18025]	protein_coding	coding	234373456	234384049	1	1	chromosome
ENSG00000187678	464.183	-0.243399	0.100844	-2.41151	0.0158867	0.273992	SPRY4	sprouty RTK signaling antagonist 4 [Source:HGNC Symbol;Acc:HGNC:15533]	protein_coding	coding	142310427	142326455	5	-1	chromosome
ENSG00000266472	699.065	-0.218772	0.0907064	-2.41161	0.0158822	0.273992	MRPS21	mitochondrial ribosomal protein S21 [Source:HGNC Symbol;Acc:HGNC:14046]	protein_coding	coding	150293720	150308979	1	1	chromosome
ENSG00000272578	64.4441	-0.329333	0.13706	-2.41412	0.0157731	0.273992	AP000347.1	NA	transcribed_unprocessed_pseudogene	pseudo	23658094	23717356	22	-1	chromosome
ENSG00000198804	193322	-0.112375	0.0466196	-2.41045	0.0159329	0.274167	MT-CO1	mitochondrially encoded cytochrome c oxidase I [Source:HGNC Symbol;Acc:HGNC:7419]	protein_coding	mito	5904	7445	MT	1	chromosome
ENSG00000183527	941.662	0.218803	0.0908966	2.40833	0.0160255	0.275422	PSMG1	proteasome assembly chaperone 1 [Source:HGNC Symbol;Acc:HGNC:3043]	protein_coding	coding	39174769	39183851	21	-1	chromosome
ENSG00000227906	25.2188	0.296605	0.123316	2.40781	0.0160484	0.275477	SNAP25-AS1	SNAP25 antisense RNA 1 [Source:HGNC Symbol;Acc:HGNC:44312]	antisense_RNA	other	10021978	10368776	20	-1	chromosome
ENSG00000206195	729.67	-0.238467	0.0990065	-2.40659	0.0161024	0.276067	DUXAP8	double homeobox A pseudogene 8 [Source:NCBI gene;Acc:503637]	processed_transcript	other	15784959	15829984	22	1	chromosome
ENSG00000205213	2085.01	0.155063	0.0644639	2.40583	0.0161357	0.276299	LGR4	leucine rich repeat containing G protein-coupled receptor 4 [Source:HGNC Symbol;Acc:HGNC:13299]	protein_coding	coding	27365961	27472775	11	-1	chromosome
ENSG00000146856	108.356	0.334774	0.138864	2.40479	0.0161817	0.276749	AGBL3	ATP/GTP binding protein like 3 [Source:HGNC Symbol;Acc:HGNC:27981]	protein_coding	coding	134986508	135147963	7	1	chromosome
ENSG00000068796	427.749	-0.272788	0.113289	-2.40334	0.0162461	0.277172	KIF2A	kinesin family member 2A [Source:HGNC Symbol;Acc:HGNC:6318]	protein_coding	coding	62306162	62537249	5	1	chromosome
ENSG00000083750	131.461	-0.336113	0.13929	-2.40361	0.0162341	0.277172	RRAGB	Ras related GTP binding B [Source:HGNC Symbol;Acc:HGNC:19901]	protein_coding	coding	55717739	55758774	X	1	chromosome
ENSG00000143162	679.75	0.20972	0.0873094	2.40271	0.0162742	0.277314	CREG1	cellular repressor of E1A stimulated genes 1 [Source:HGNC Symbol;Acc:HGNC:2351]	protein_coding	coding	167529677	167553767	1	-1	chromosome
ENSG00000204104	303.244	-0.321518	0.133767	-2.40189	0.0163106	0.277597	TRAF3IP1	TRAF3 interacting protein 1 [Source:HGNC Symbol;Acc:HGNC:17861]	protein_coding	coding	238320441	238400900	2	1	chromosome
ENSG00000213066	917.346	0.199878	0.0832582	2.40073	0.0163622	0.278138	FGFR1OP	FGFR1 oncogene partner [Source:HGNC Symbol;Acc:HGNC:17012]	protein_coding	coding	166999182	167052713	6	1	chromosome
ENSG00000018869	21.0572	0.278502	0.117334	2.39929	0.0164268	0.278896	ZNF582	zinc finger protein 582 [Source:HGNC Symbol;Acc:HGNC:26421]	protein_coding	coding	56375846	56393545	19	-1	chromosome
ENSG00000105202	1858.89	-0.167333	0.0697763	-2.3975	0.0165076	0.279591	FBL	fibrillarin [Source:HGNC Symbol;Acc:HGNC:3599]	protein_coding	coding	39834458	39846414	19	-1	chromosome
ENSG00000213398	313.96	-0.282798	0.11771	-2.39771	0.016498	0.279591	LCAT	lecithin-cholesterol acyltransferase [Source:HGNC Symbol;Acc:HGNC:6522]	protein_coding	coding	67939750	67944131	16	-1	chromosome
ENSG00000107957	1263.43	-0.180871	0.0754424	-2.39671	0.0165429	0.27985	SH3PXD2A	SH3 and PX domains 2A [Source:HGNC Symbol;Acc:HGNC:23664]	protein_coding	coding	103594027	103855543	10	-1	chromosome
ENSG00000224660	75.611	0.28807	0.123296	2.39593	0.0165782	0.279978	SH3BP5-AS1	SH3BP5 antisense RNA 1 [Source:HGNC Symbol;Acc:HGNC:44501]	antisense_RNA	other	15254184	15264493	3	1	chromosome
ENSG00000278318	24.6481	0.0536123	0.0384834	2.39566	0.0165904	0.279978	ZNF229	zinc finger protein 229 [Source:HGNC Symbol;Acc:HGNC:13022]	protein_coding	coding	44417519	44448578	19	-1	chromosome
ENSG00000100345	5998.79	-0.156359	0.0652943	-2.39453	0.0166417	0.280506	MYH9	myosin heavy chain 9 [Source:HGNC Symbol;Acc:HGNC:7579]	protein_coding	coding	36281281	36388018	22	-1	chromosome
ENSG00000130561	42.555	0.077742	0.0477225	2.39293	0.0167142	0.281052	SAG	S-antigen visual arrestin [Source:HGNC Symbol;Acc:HGNC:10521]	protein_coding	coding	233307816	233347055	2	1	chromosome
ENSG00000196865	444.05	0.325979	0.136473	2.39328	0.0166987	0.281052	NHLRC2	NHL repeat containing 2 [Source:HGNC Symbol;Acc:HGNC:24731]	protein_coding	coding	113854661	113917194	10	1	chromosome
ENSG00000088832	3872.2	-0.155449	0.0650028	-2.39114	0.0167964	0.282094	FKBP1A	FK506 binding protein 1A [Source:HGNC Symbol;Acc:HGNC:3711]	protein_coding	coding	1368978	1393172	20	-1	chromosome
ENSG00000255495	71.6907	-0.333773	0.139395	-2.39056	0.0168228	0.2822	AC145124.1	NA	antisense_RNA	other	12194467	12196280	8	1	chromosome
ENSG00000100036	18.3983	-0.142528	0.0698698	-2.39005	0.0168459	0.282249	SLC35E4	solute carrier family 35 member E4 [Source:HGNC Symbol;Acc:HGNC:17058]	protein_coding	coding	30635652	30669016	22	1	chromosome
ENSG00000205246	591.329	-0.240465	0.100521	-2.38945	0.0168735	0.282375	NA	NA	NA	NA	NA	NA	NA	NA	NA
ENSG00000101181	362.109	-0.278009	0.116288	-2.389	0.0168944	0.282386	MTG2	mitochondrial ribosome associated GTPase 2 [Source:HGNC Symbol;Acc:HGNC:16239]	protein_coding	coding	62183029	62203568	20	1	chromosome
ENSG00000001461	161.42	0.312845	0.131424	2.38762	0.0169578	0.282621	NIPAL3	NIPA like domain containing 3 [Source:HGNC Symbol;Acc:HGNC:25233]	protein_coding	coding	24415794	24472976	1	1	chromosome
ENSG00000060656	784.95	-0.323066	0.135325	-2.38607	0.0170295	0.282621	PTPRU	protein tyrosine phosphatase, receptor type U [Source:HGNC Symbol;Acc:HGNC:9683]	protein_coding	coding	29236516	29326813	1	1	chromosome
ENSG00000121774	2309.31	0.157147	0.065834	2.38729	0.0169732	0.282621	KHDRBS1	KH RNA binding domain containing, signal transduction associated 1 [Source:HGNC Symbol;Acc:HGNC:18116]	protein_coding	coding	32013829	32060850	1	1	chromosome
ENSG00000137522	287.674	-0.29726	0.124376	-2.38612	0.017027	0.282621	RNF121	ring finger protein 121 [Source:HGNC Symbol;Acc:HGNC:21070]	protein_coding	coding	71928701	71997597	11	1	chromosome
ENSG00000197603	326.983	0.323487	0.136675	2.3875	0.0169633	0.282621	C5orf42	chromosome 5 open reading frame 42 [Source:HGNC Symbol;Acc:HGNC:25801]	protein_coding	coding	37106228	37249428	5	-1	chromosome
ENSG00000243199	72.9198	-0.333585	0.139271	-2.38652	0.0170086	0.282621	AC115223.1	NA	processed_pseudogene	pseudo	65573459	65574328	4	1	chromosome
ENSG00000093144	1387.78	0.256045	0.107478	2.38386	0.017132	0.283477	ECHDC1	ethylmalonyl-CoA decarboxylase 1 [Source:HGNC Symbol;Acc:HGNC:21489]	protein_coding	coding	127288710	127343609	6	-1	chromosome
ENSG00000105640	5391.05	-0.15319	0.0642446	-2.38421	0.0171159	0.283477	RPL18A	ribosomal protein L18a [Source:HGNC Symbol;Acc:HGNC:10311]	protein_coding	coding	17859876	17864153	19	1	chromosome
ENSG00000105784	23.0949	0.249057	0.107	2.38322	0.017162	0.283477	RUNDC3B	RUN domain containing 3B [Source:HGNC Symbol;Acc:HGNC:30286]	protein_coding	coding	87627548	87832296	7	1	chromosome
ENSG00000167085	4087.24	-0.162055	0.0679768	-2.38362	0.0171431	0.283477	PHB	prohibitin [Source:HGNC Symbol;Acc:HGNC:8912]	protein_coding	coding	49404049	49414905	17	-1	chromosome
ENSG00000171657	14.1454	0.115625	0.060238	2.38258	0.0171919	0.283637	GPR82	G protein-coupled receptor 82 [Source:HGNC Symbol;Acc:HGNC:4533]	protein_coding	coding	41724155	41730135	X	1	chromosome
ENSG00000164182	389.398	0.276143	0.116112	2.38154	0.0172406	0.284104	NDUFAF2	NADH:ubiquinone oxidoreductase complex assembly factor 2 [Source:HGNC Symbol;Acc:HGNC:28086]	protein_coding	coding	60945129	61153037	5	1	chromosome
ENSG00000119965	141.022	-0.31742	0.132965	-2.38044	0.0172918	0.284614	C10orf88	chromosome 10 open reading frame 88 [Source:HGNC Symbol;Acc:HGNC:25822]	protein_coding	coding	122930903	122954403	10	-1	chromosome
ENSG00000114796	116.364	0.329979	0.138597	2.37848	0.0173842	0.285799	KLHL24	kelch like family member 24 [Source:HGNC Symbol;Acc:HGNC:25947]	protein_coding	coding	183635568	183684477	3	1	chromosome
ENSG00000131002	1644.4	0.199768	0.0840544	2.37756	0.0174274	0.285838	TXLNGY	taxilin gamma pseudogene, Y-linked [Source:HGNC Symbol;Acc:HGNC:18473]	transcribed_unprocessed_pseudogene	pseudo	19567313	19606274	Y	1	chromosome
ENSG00000277258	495.038	-0.313602	0.13161	-2.37772	0.0174199	0.285838	PCGF2	polycomb group ring finger 2 [Source:HGNC Symbol;Acc:HGNC:12929]	protein_coding	coding	38733897	38749817	17	-1	chromosome
ENSG00000158352	15.1909	0.211321	0.0933551	2.37571	0.017515	0.286604	SHROOM4	shroom family member 4 [Source:HGNC Symbol;Acc:HGNC:29215]	protein_coding	coding	50591647	50814302	X	-1	chromosome
ENSG00000174564	14.7628	0.138387	0.0686085	2.37612	0.0174957	0.286604	IL20RB	interleukin 20 receptor subunit beta [Source:HGNC Symbol;Acc:HGNC:6004]	protein_coding	coding	136946230	137011085	3	1	chromosome
ENSG00000114650	668.131	-0.252087	0.106154	-2.37491	0.0175532	0.286894	SCAP	SREBF chaperone [Source:HGNC Symbol;Acc:HGNC:30634]	protein_coding	coding	47413694	47477126	3	-1	chromosome
ENSG00000073614	733.049	0.322631	0.136234	2.37384	0.0176044	0.287395	KDM5A	lysine demethylase 5A [Source:HGNC Symbol;Acc:HGNC:9886]	protein_coding	coding	280129	389454	12	-1	chromosome
ENSG00000132436	281.178	0.287771	0.121347	2.37202	0.0176913	0.288243	FIGNL1	fidgetin like 1 [Source:HGNC Symbol;Acc:HGNC:13286]	protein_coding	coding	50444128	50542535	7	-1	chromosome
ENSG00000188313	301.772	0.297595	0.125725	2.37189	0.0176975	0.288243	PLSCR1	phospholipid scramblase 1 [Source:HGNC Symbol;Acc:HGNC:9092]	protein_coding	coding	146515180	146544864	3	-1	chromosome
ENSG00000139618	412.09	0.322357	0.13641	2.3707	0.0177542	0.288831	BRCA2	BRCA2, DNA repair associated [Source:HGNC Symbol;Acc:HGNC:1101]	protein_coding	coding	32315474	32400266	13	1	chromosome
ENSG00000242616	657.335	0.218493	0.0921872	2.37026	0.0177755	0.288841	GNG10	G protein subunit gamma 10 [Source:HGNC Symbol;Acc:HGNC:4402]	protein_coding	coding	111661335	111670246	9	1	chromosome
ENSG00000137713	935.236	-0.244525	0.103184	-2.3687	0.0178507	0.289393	PPP2R1B	protein phosphatase 2 scaffold subunit Abeta [Source:HGNC Symbol;Acc:HGNC:9303]	protein_coding	coding	111726908	111766427	11	-1	chromosome
ENSG00000196961	672.298	-0.222317	0.0937965	-2.36897	0.0178375	0.289393	AP2A1	adaptor related protein complex 2 alpha 1 subunit [Source:HGNC Symbol;Acc:HGNC:561]	protein_coding	coding	49766968	49807113	19	1	chromosome
ENSG00000129566	417.294	0.328068	0.139312	2.36621	0.0179711	0.290374	TEP1	telomerase associated protein 1 [Source:HGNC Symbol;Acc:HGNC:11726]	protein_coding	coding	20365667	20413429	14	-1	chromosome
ENSG00000141098	281.433	0.271632	0.11494	2.36616	0.0179735	0.290374	GFOD2	glucose-fructose oxidoreductase domain containing 2 [Source:HGNC Symbol;Acc:HGNC:28159]	protein_coding	coding	67674531	67719421	16	-1	chromosome
ENSG00000168002	480.125	-0.238373	0.100592	-2.36686	0.0179395	0.290374	POLR2G	RNA polymerase II subunit G [Source:HGNC Symbol;Acc:HGNC:9194]	protein_coding	coding	62761544	62766710	11	1	chromosome
ENSG00000170348	3319.49	-0.196644	0.0831241	-2.36526	0.0180173	0.290747	TMED10	transmembrane p24 trafficking protein 10 [Source:HGNC Symbol;Acc:HGNC:16998]	protein_coding	coding	75131470	75176631	14	-1	chromosome
ENSG00000127831	3379.03	-0.138989	0.0588082	-2.36343	0.0181069	0.291856	VIL1	villin 1 [Source:HGNC Symbol;Acc:HGNC:12690]	protein_coding	coding	218419092	218453295	2	1	chromosome
ENSG00000189376	149.293	0.321773	0.136068	2.3609	0.0182305	0.293511	C8orf76	chromosome 8 open reading frame 76 [Source:HGNC Symbol;Acc:HGNC:25924]	protein_coding	coding	123219957	123241398	8	-1	chromosome
ENSG00000106100	82.203	0.325481	0.138782	2.36023	0.0182638	0.29371	NOD1	nucleotide binding oligomerization domain containing 1 [Source:HGNC Symbol;Acc:HGNC:16390]	protein_coding	coding	30424527	30478784	7	-1	chromosome
ENSG00000015520	415.448	-0.247045	0.104712	-2.35603	0.0184714	0.295145	NPC1L1	NPC1 like intracellular cholesterol transporter 1 [Source:HGNC Symbol;Acc:HGNC:7898]	protein_coding	coding	44512535	44541315	7	-1	chromosome
ENSG00000067182	730.662	0.276923	0.117754	2.35291	0.018627	0.295145	TNFRSF1A	TNF receptor superfamily member 1A [Source:HGNC Symbol;Acc:HGNC:11916]	protein_coding	coding	6328757	6342114	12	-1	chromosome
ENSG00000100027	18.9783	0.162856	0.0770021	2.35713	0.0184168	0.295145	YPEL1	yippee like 1 [Source:HGNC Symbol;Acc:HGNC:12845]	protein_coding	coding	21697544	21735834	22	-1	chromosome
ENSG00000125633	1651.83	0.172297	0.0732173	2.35332	0.0186068	0.295145	CCDC93	coiled-coil domain containing 93 [Source:HGNC Symbol;Acc:HGNC:25611]	protein_coding	coding	117915478	118014133	2	-1	chromosome
ENSG00000134825	486.795	-0.25473	0.108009	-2.35518	0.0185135	0.295145	TMEM258	transmembrane protein 258 [Source:HGNC Symbol;Acc:HGNC:1164]	protein_coding	coding	61768501	61792802	11	-1	chromosome
ENSG00000137411	892.386	-0.227729	0.0966907	-2.35391	0.018577	0.295145	VARS2	valyl-tRNA synthetase 2, mitochondrial [Source:HGNC Symbol;Acc:HGNC:21642]	protein_coding	coding	30908242	30926459	6	1	chromosome
ENSG00000148296	444.086	0.258222	0.10986	2.35337	0.0186043	0.295145	SURF6	surfeit 6 [Source:HGNC Symbol;Acc:HGNC:11478]	protein_coding	coding	133328774	133336398	9	-1	chromosome
ENSG00000172840	469.004	-0.270425	0.1146	-2.35758	0.0183946	0.295145	PDP2	pyruvate dehyrogenase phosphatase catalytic subunit 2 [Source:HGNC Symbol;Acc:HGNC:30263]	protein_coding	coding	66878589	66895754	16	1	chromosome
ENSG00000179583	29.1312	-0.19187	0.0883467	-2.3532	0.0186128	0.295145	CIITA	class II major histocompatibility complex transactivator [Source:HGNC Symbol;Acc:HGNC:7067]	protein_coding	coding	10866222	10932281	16	1	chromosome
ENSG00000205212	60.7279	-0.325932	0.138559	-2.35644	0.0184511	0.295145	CCDC144NL	coiled-coil domain containing 144 family, N-terminal like [Source:HGNC Symbol;Acc:HGNC:33735]	protein_coding	coding	20836447	20896140	17	-1	chromosome
ENSG00000239415	20.9345	0.261304	0.113415	2.35413	0.0185664	0.295145	AP001469.3	NA	antisense_RNA	other	46251549	46254133	21	-1	chromosome
ENSG00000269976	45.3949	0.312783	0.132708	2.35447	0.0185491	0.295145	AC012065.3	NA	lincRNA	noncoding	20586248	20586686	2	-1	chromosome
ENSG00000278053	617.958	0.236873	0.100509	2.35593	0.0184766	0.295145	DDX52	DExD-box helicase 52 [Source:HGNC Symbol;Acc:HGNC:20038]	protein_coding	coding	37609739	37643464	17	-1	chromosome
ENSG00000114439	554.246	0.317325	0.135342	2.35046	0.0187502	0.296426	BBX	BBX, HMG-box containing [Source:HGNC Symbol;Acc:HGNC:14422]	protein_coding	coding	107522936	107811324	3	1	chromosome
ENSG00000250722	19616.5	0.14495	0.0616665	2.35054	0.0187464	0.296426	SELENOP	selenoprotein P [Source:HGNC Symbol;Acc:HGNC:10751]	protein_coding	coding	42799880	42887392	5	-1	chromosome
ENSG00000100714	2106.22	-0.163972	0.0697805	-2.34919	0.0188144	0.29679	MTHFD1	methylenetetrahydrofolate dehydrogenase, cyclohydrolase and formyltetrahydrofolate synthetase 1 [Source:HGNC Symbol;Acc:HGNC:7432]	protein_coding	coding	64388031	64463457	14	1	chromosome
ENSG00000113504	556.971	-0.23872	0.101552	-2.34917	0.0188156	0.29679	SLC12A7	solute carrier family 12 member 7 [Source:HGNC Symbol;Acc:HGNC:10915]	protein_coding	coding	1050376	1112035	5	-1	chromosome
ENSG00000134480	455.47	-0.257621	0.109661	-2.34674	0.0189386	0.29806	CCNH	cyclin H [Source:HGNC Symbol;Acc:HGNC:1594]	protein_coding	coding	87391494	87413019	5	-1	chromosome
ENSG00000205746	553.227	-0.319047	0.136198	-2.34683	0.0189341	0.29806	AC126755.1	NA	transcribed_unprocessed_pseudogene	pseudo	18334400	18352476	16	-1	chromosome
ENSG00000105254	810.983	-0.202789	0.0864658	-2.34372	0.0190923	0.298467	TBCB	tubulin folding cofactor B [Source:HGNC Symbol;Acc:HGNC:1989]	protein_coding	coding	36114289	36125947	19	1	chromosome
ENSG00000128272	4500.66	0.155602	0.0663659	2.3445	0.0190525	0.298467	ATF4	activating transcription factor 4 [Source:HGNC Symbol;Acc:HGNC:786]	protein_coding	coding	39519695	39522685	22	1	chromosome
ENSG00000151176	521.681	-0.245506	0.104726	-2.34468	0.0190433	0.298467	PLBD2	phospholipase B domain containing 2 [Source:HGNC Symbol;Acc:HGNC:27283]	protein_coding	coding	113358566	113391625	12	1	chromosome
ENSG00000171295	173.797	0.324625	0.139418	2.3438	0.0190886	0.298467	ZNF440	zinc finger protein 440 [Source:HGNC Symbol;Acc:HGNC:20874]	protein_coding	coding	11814284	11835201	19	1	chromosome
ENSG00000171497	977.717	0.230592	0.0983437	2.34455	0.0190499	0.298467	PPID	peptidylprolyl isomerase D [Source:HGNC Symbol;Acc:HGNC:9257]	protein_coding	coding	158709134	158723396	4	-1	chromosome
ENSG00000261556	29.3578	0.217637	0.0978813	2.34579	0.0189866	0.298467	SMG1P7	SMG1P7, nonsense mediated mRNA decay associated PI3K related kinase pseudogene 7 [Source:HGNC Symbol;Acc:HGNC:49864]	transcribed_unprocessed_pseudogene	pseudo	70219574	70246610	16	-1	chromosome
ENSG00000033867	455.838	-0.247536	0.105583	-2.34208	0.0191768	0.29912	SLC4A7	solute carrier family 4 member 7 [Source:HGNC Symbol;Acc:HGNC:11033]	protein_coding	coding	27372721	27484420	3	-1	chromosome
ENSG00000081051	91169.2	0.136025	0.0580697	2.34245	0.0191577	0.29912	AFP	alpha fetoprotein [Source:HGNC Symbol;Acc:HGNC:317]	protein_coding	coding	73431138	73456174	4	1	chromosome
ENSG00000145192	28926.9	-0.132882	0.0567874	-2.33995	0.0192863	0.300222	AHSG	alpha 2-HS glycoprotein [Source:HGNC Symbol;Acc:HGNC:349]	protein_coding	coding	186612923	186621318	3	1	chromosome
ENSG00000213024	838.585	-0.201811	0.0862332	-2.33987	0.0192904	0.300222	NUP62	nucleoporin 62 [Source:HGNC Symbol;Acc:HGNC:8066]	protein_coding	coding	49906825	49929763	19	-1	chromosome
ENSG00000129559	2473.65	-0.146121	0.0624654	-2.33882	0.0193448	0.300402	NEDD8	neural precursor cell expressed, developmentally down-regulated 8 [Source:HGNC Symbol;Acc:HGNC:7732]	protein_coding	coding	24216852	24232454	14	-1	chromosome
ENSG00000181450	105.138	-0.32452	0.138368	-2.33913	0.0193289	0.300402	ZNF678	zinc finger protein 678 [Source:HGNC Symbol;Acc:HGNC:28652]	protein_coding	coding	227563543	227677443	1	1	chromosome
ENSG00000087086	60319.1	0.131374	0.0562233	2.33664	0.0194579	0.301751	FTL	ferritin light chain [Source:HGNC Symbol;Acc:HGNC:3999]	protein_coding	coding	48965301	48966878	19	1	chromosome
ENSG00000137868	29.8253	-0.292217	0.127098	-2.33632	0.0194748	0.301751	STRA6	stimulated by retinoic acid 6 [Source:HGNC Symbol;Acc:HGNC:30650]	protein_coding	coding	74179466	74212267	15	-1	chromosome
ENSG00000006652	604.959	0.216327	0.0926377	2.33544	0.0195207	0.301779	IFRD1	interferon related developmental regulator 1 [Source:HGNC Symbol;Acc:HGNC:5456]	protein_coding	coding	112422968	112481017	7	1	chromosome
ENSG00000126785	11.5378	0.0862801	0.0502872	2.3344	0.0195746	0.301779	RHOJ	ras homolog family member J [Source:HGNC Symbol;Acc:HGNC:688]	protein_coding	coding	63204114	63293219	14	1	chromosome
ENSG00000132386	7195.21	0.174414	0.0747542	2.33306	0.0196452	0.301779	SERPINF1	serpin family F member 1 [Source:HGNC Symbol;Acc:HGNC:8824]	protein_coding	coding	1761959	1777574	17	1	chromosome
ENSG00000143632	27.324	-0.283707	0.124064	-2.33298	0.0196489	0.301779	ACTA1	actin, alpha 1, skeletal muscle [Source:HGNC Symbol;Acc:HGNC:129]	protein_coding	coding	229431245	229434098	1	-1	chromosome
ENSG00000152804	917.829	0.214052	0.0916711	2.33573	0.0195053	0.301779	HHEX	hematopoietically expressed homeobox [Source:HGNC Symbol;Acc:HGNC:4901]	protein_coding	coding	92689951	92695646	10	1	chromosome
ENSG00000166704	148.027	0.322395	0.13818	2.33449	0.0195699	0.301779	ZNF606	zinc finger protein 606 [Source:HGNC Symbol;Acc:HGNC:25879]	protein_coding	coding	57977053	58003349	19	-1	chromosome
ENSG00000196814	520.875	-0.263858	0.113109	-2.3337	0.0196114	0.301779	MVB12B	multivesicular body subunit 12B [Source:HGNC Symbol;Acc:HGNC:23368]	protein_coding	coding	126326849	126507041	9	1	chromosome
ENSG00000197779	54.1243	-0.274158	0.118601	-2.33413	0.0195889	0.301779	ZNF81	zinc finger protein 81 [Source:HGNC Symbol;Acc:HGNC:13156]	protein_coding	coding	47836902	48002561	X	1	chromosome
ENSG00000034152	606.955	-0.214853	0.0920766	-2.33238	0.0196809	0.30194	MAP2K3	mitogen-activated protein kinase kinase 3 [Source:HGNC Symbol;Acc:HGNC:6843]	protein_coding	coding	21284672	21315240	17	1	chromosome
ENSG00000100350	825.219	-0.223253	0.0957673	-2.32986	0.0198133	0.302645	FOXRED2	FAD dependent oxidoreductase domain containing 2 [Source:HGNC Symbol;Acc:HGNC:26264]	protein_coding	coding	36487190	36507101	22	-1	chromosome
ENSG00000151687	62.6756	0.318474	0.137599	2.33071	0.0197684	0.302645	ANKAR	ankyrin and armadillo repeat containing [Source:HGNC Symbol;Acc:HGNC:26350]	protein_coding	coding	189674290	189761193	2	1	chromosome
ENSG00000163596	45.5721	0.300682	0.12967	2.32996	0.0198081	0.302645	ICA1L	islet cell autoantigen 1 like [Source:HGNC Symbol;Acc:HGNC:14442]	protein_coding	coding	202773150	202871985	2	-1	chromosome
ENSG00000196912	93.827	-0.32406	0.139427	-2.33009	0.0198011	0.302645	ANKRD36B	ankyrin repeat domain 36B [Source:HGNC Symbol;Acc:HGNC:29333]	protein_coding	coding	97492663	97589965	2	-1	chromosome
ENSG00000096433	1623.1	-0.252332	0.108301	-2.32881	0.0198689	0.302834	ITPR3	inositol 1,4,5-trisphosphate receptor type 3 [Source:HGNC Symbol;Acc:HGNC:6182]	protein_coding	coding	33620365	33696574	6	1	chromosome
ENSG00000177879	1355.63	0.215499	0.0925387	2.32904	0.019857	0.302834	AP3S1	adaptor related protein complex 3 sigma 1 subunit [Source:HGNC Symbol;Acc:HGNC:2013]	protein_coding	coding	115841481	115914081	5	1	chromosome
ENSG00000171603	1371.85	-0.190349	0.0817598	-2.32765	0.0199305	0.303441	CLSTN1	calsyntenin 1 [Source:HGNC Symbol;Acc:HGNC:17447]	protein_coding	coding	9729026	9824526	1	-1	chromosome
ENSG00000127084	28.3641	0.25676	0.113661	2.32656	0.0199888	0.30367	FGD3	FYVE, RhoGEF and PH domain containing 3 [Source:HGNC Symbol;Acc:HGNC:16027]	protein_coding	coding	92947451	93036236	9	1	chromosome
ENSG00000226259	200.3	0.320618	0.138564	2.32682	0.0199746	0.30367	GTF2H2B	general transcription factor IIH subunit 2B (pseudogene) [Source:HGNC Symbol;Acc:HGNC:31393]	transcribed_unprocessed_pseudogene	pseudo	70415352	70448015	5	1	chromosome
ENSG00000064102	524.997	0.243224	0.104667	2.32439	0.0201046	0.305098	INTS13	integrator complex subunit 13 [Source:HGNC Symbol;Acc:HGNC:20174]	protein_coding	coding	26905181	26938326	12	-1	chromosome
ENSG00000167193	963.292	-0.180116	0.0775058	-2.32309	0.0201742	0.305283	CRK	CRK proto-oncogene, adaptor protein [Source:HGNC Symbol;Acc:HGNC:2362]	protein_coding	coding	1420689	1463162	17	-1	chromosome
ENSG00000198624	756.656	0.256318	0.110437	2.32321	0.0201679	0.305283	CCDC69	coiled-coil domain containing 69 [Source:HGNC Symbol;Acc:HGNC:24487]	protein_coding	coding	151181052	151224145	5	-1	chromosome
ENSG00000225373	499.699	-0.258441	0.111205	-2.32294	0.0201822	0.305283	NA	NA	NA	NA	NA	NA	NA	NA	NA
ENSG00000169174	1467.92	-0.180186	0.0775787	-2.32173	0.0202473	0.305607	PCSK9	proprotein convertase subtilisin/kexin type 9 [Source:HGNC Symbol;Acc:HGNC:20001]	protein_coding	coding	55039548	55064852	1	1	chromosome
ENSG00000169499	183.248	0.321882	0.139429	2.32196	0.0202351	0.305607	PLEKHA2	pleckstrin homology domain containing A2 [Source:HGNC Symbol;Acc:HGNC:14336]	protein_coding	coding	38901235	38973909	8	1	chromosome
ENSG00000231025	65.747	0.317269	0.137723	2.32025	0.0203276	0.306489	NA	NA	NA	NA	NA	NA	NA	NA	NA
ENSG00000069020	148.704	0.322252	0.139006	2.31814	0.0204418	0.30788	MAST4	microtubule associated serine/threonine kinase family member 4 [Source:HGNC Symbol;Acc:HGNC:19037]	protein_coding	coding	66596361	67169595	5	1	chromosome
ENSG00000163481	203.515	-0.302356	0.130307	-2.31691	0.0205089	0.308558	RNF25	ring finger protein 25 [Source:HGNC Symbol;Acc:HGNC:14662]	protein_coding	coding	218663864	218672411	2	-1	chromosome
ENSG00000178188	396.489	-0.298857	0.128826	-2.31527	0.0205982	0.30957	SH2B1	SH2B adaptor protein 1 [Source:HGNC Symbol;Acc:HGNC:30417]	protein_coding	coding	28846600	28874212	16	1	chromosome
ENSG00000065621	43.4969	0.229335	0.103412	2.3142	0.0206567	0.309752	GSTO2	glutathione S-transferase omega 2 [Source:HGNC Symbol;Acc:HGNC:23064]	protein_coding	coding	104268873	104304945	10	1	chromosome
ENSG00000182768	1010.86	0.214723	0.0927714	2.31384	0.0206767	0.309752	NGRN	neugrin, neurite outgrowth associated [Source:HGNC Symbol;Acc:HGNC:18077]	protein_coding	coding	90265659	90278141	15	1	chromosome
ENSG00000188338	579.272	-0.305349	0.131704	-2.314	0.0206679	0.309752	SLC38A3	solute carrier family 38 member 3 [Source:HGNC Symbol;Acc:HGNC:18044]	protein_coding	coding	50205246	50221486	3	1	chromosome
ENSG00000171634	1748.71	0.278534	0.120564	2.31194	0.0207809	0.310982	BPTF	bromodomain PHD finger transcription factor [Source:HGNC Symbol;Acc:HGNC:3581]	protein_coding	coding	67825524	67984378	17	1	chromosome
ENSG00000058272	735.958	0.23572	0.101978	2.31037	0.0208676	0.311324	PPP1R12A	protein phosphatase 1 regulatory subunit 12A [Source:HGNC Symbol;Acc:HGNC:7618]	protein_coding	coding	79773563	79935460	12	-1	chromosome
ENSG00000103066	299.011	-0.295328	0.127707	-2.31032	0.0208705	0.311324	PLA2G15	phospholipase A2 group XV [Source:HGNC Symbol;Acc:HGNC:17163]	protein_coding	coding	68245304	68261062	16	1	chromosome
ENSG00000224389	2728.74	-0.162577	0.0703354	-2.3111	0.0208273	0.311324	C4B	complement C4B (Chido blood group) [Source:HGNC Symbol;Acc:HGNC:1324]	protein_coding	coding	32014762	32035418	6	1	chromosome
ENSG00000253882	17.354	0.212598	0.0962144	2.30984	0.0208969	0.311386	AC099548.2	NA	transcribed_unprocessed_pseudogene	pseudo	143761790	143836933	7	-1	chromosome
ENSG00000232611	10.9198	0.218416	0.0963096	2.30931	0.0209265	0.311495	AL683813.1	NA	lincRNA	noncoding	136840931	136847797	X	-1	chromosome
ENSG00000196911	214.51	0.300292	0.12991	2.30885	0.0209517	0.31154	KPNA5	karyopherin subunit alpha 5 [Source:HGNC Symbol;Acc:HGNC:6398]	protein_coding	coding	116681187	116741866	6	1	chromosome
ENSG00000136810	3026.35	-0.134292	0.0581748	-2.30814	0.0209915	0.311801	TXN	thioredoxin [Source:HGNC Symbol;Acc:HGNC:12435]	protein_coding	coding	110243811	110256640	9	-1	chromosome
ENSG00000143390	603.757	0.266506	0.115678	2.30666	0.0210736	0.312688	RFX5	regulatory factor X5 [Source:HGNC Symbol;Acc:HGNC:9986]	protein_coding	coding	151340640	151347357	1	-1	chromosome
ENSG00000143889	1009.41	0.18662	0.0809481	2.30569	0.0211278	0.313162	HNRNPLL	heterogeneous nuclear ribonucleoprotein L like [Source:HGNC Symbol;Acc:HGNC:25127]	protein_coding	coding	38561978	38603586	2	-1	chromosome
ENSG00000155959	605.501	0.282797	0.12287	2.30492	0.0211713	0.313474	VBP1	VHL binding protein 1 [Source:HGNC Symbol;Acc:HGNC:12662]	protein_coding	coding	155197007	155239817	X	1	chromosome
ENSG00000086475	1195.12	-0.27338	0.118677	-2.30082	0.0214017	0.3139	SEPHS1	selenophosphate synthetase 1 [Source:HGNC Symbol;Acc:HGNC:19685]	protein_coding	coding	13317424	13348298	10	-1	chromosome
ENSG00000106714	24.5675	0.271396	0.118856	2.30304	0.0212768	0.3139	CNTNAP3	contactin associated protein like 3 [Source:HGNC Symbol;Acc:HGNC:13834]	protein_coding	coding	39072767	39288315	9	-1	chromosome
ENSG00000111266	1430.52	0.20532	0.0891933	2.30226	0.0213204	0.3139	DUSP16	dual specificity phosphatase 16 [Source:HGNC Symbol;Acc:HGNC:17909]	protein_coding	coding	12474210	12562383	12	-1	chromosome
ENSG00000155629	175.756	0.290415	0.126325	2.30104	0.0213894	0.3139	PIK3AP1	phosphoinositide-3-kinase adaptor protein 1 [Source:HGNC Symbol;Acc:HGNC:30034]	protein_coding	coding	96593312	96720514	10	-1	chromosome
ENSG00000167323	468.201	-0.287627	0.124776	-2.30267	0.0212975	0.3139	STIM1	stromal interaction molecule 1 [Source:HGNC Symbol;Acc:HGNC:11386]	protein_coding	coding	3854527	4093210	11	1	chromosome
ENSG00000204706	13.6702	0.184176	0.0849578	2.30114	0.0213839	0.3139	MAMDC2-AS1	MAMDC2 antisense RNA 1 [Source:HGNC Symbol;Acc:HGNC:48719]	antisense_RNA	other	70033921	70175888	9	-1	chromosome
ENSG00000214756	57.9536	-0.311178	0.136522	-2.30084	0.0214005	0.3139	METTL12	methyltransferase like 12 [Source:HGNC Symbol;Acc:HGNC:33113]	protein_coding	coding	62665309	62668496	11	1	chromosome
ENSG00000215012	311.884	-0.302648	0.131004	-2.30254	0.0213048	0.3139	RTL10	retrotransposon Gag like 10 [Source:HGNC Symbol;Acc:HGNC:26112]	protein_coding	coding	19846138	19854896	22	-1	chromosome
ENSG00000242288	26.9549	-0.270209	0.118925	-2.30388	0.0212293	0.3139	AC022400.3	NA	processed_transcript	other	73674295	73730466	10	-1	chromosome
ENSG00000006744	849.926	0.25553	0.111217	2.30019	0.0214374	0.314094	ELAC2	elaC ribonuclease Z 2 [Source:HGNC Symbol;Acc:HGNC:14198]	protein_coding	coding	12992391	13018187	17	-1	chromosome
ENSG00000160310	738.806	-0.20184	0.0877622	-2.29896	0.0215072	0.31413	PRMT2	protein arginine methyltransferase 2 [Source:HGNC Symbol;Acc:HGNC:5186]	protein_coding	coding	46635167	46665124	21	1	chromosome
ENSG00000243649	1460.29	-0.183094	0.0796322	-2.29932	0.021487	0.31413	CFB	complement factor B [Source:HGNC Symbol;Acc:HGNC:1037]	protein_coding	coding	31945650	31952084	6	1	chromosome
ENSG00000246889	11.8765	-0.169589	0.0797464	-2.29916	0.0214958	0.31413	AP000487.1	NA	antisense_RNA	other	70372246	70398488	11	-1	chromosome
ENSG00000067334	894.228	0.206233	0.089773	2.29734	0.0215996	0.315152	DNTTIP2	deoxynucleotidyltransferase terminal interacting protein 2 [Source:HGNC Symbol;Acc:HGNC:24013]	protein_coding	coding	93866283	93879918	1	-1	chromosome
ENSG00000120868	412.343	0.297606	0.129646	2.29653	0.0216456	0.315495	APAF1	apoptotic peptidase activating factor 1 [Source:HGNC Symbol;Acc:HGNC:576]	protein_coding	coding	98645141	98735433	12	1	chromosome
ENSG00000133243	485.109	-0.2258	0.0982753	-2.29551	0.0217037	0.316012	BTBD2	BTB domain containing 2 [Source:HGNC Symbol;Acc:HGNC:15504]	protein_coding	coding	1985438	2034881	19	-1	chromosome
ENSG00000164062	1057.26	-0.224107	0.0976555	-2.29454	0.0217597	0.316498	APEH	acylaminoacyl-peptide hydrolase [Source:HGNC Symbol;Acc:HGNC:586]	protein_coding	coding	49674002	49683963	3	1	chromosome
ENSG00000100151	178.333	-0.304467	0.132434	-2.2932	0.0218363	0.317004	PICK1	protein interacting with PRKCA 1 [Source:HGNC Symbol;Acc:HGNC:9394]	protein_coding	coding	38056311	38075701	22	1	chromosome
ENSG00000154813	584.814	-0.246803	0.1075	-2.29314	0.0218397	0.317004	DPH3	diphthamide biosynthesis 3 [Source:HGNC Symbol;Acc:HGNC:27717]	protein_coding	coding	16257978	16264972	3	-1	chromosome
ENSG00000264343	43.3362	-0.309059	0.134452	-2.29273	0.0218635	0.317021	NOTCH2NL	notch 2 N-terminal like [Source:HGNC Symbol;Acc:HGNC:31862]	protein_coding	coding	146146203	146229026	1	-1	chromosome
ENSG00000233369	1090.07	0.194327	0.0847856	2.29231	0.0218878	0.317044	GTF2IP4	general transcription factor IIi pseudogene 4 [Source:HGNC Symbol;Acc:HGNC:51716]	transcribed_processed_pseudogene	pseudo	73154938	73207283	7	1	chromosome
ENSG00000164742	20.6115	-0.2497	0.109826	-2.29147	0.0219361	0.317417	ADCY1	adenylate cyclase 1 [Source:HGNC Symbol;Acc:HGNC:232]	protein_coding	coding	45574140	45723116	7	1	chromosome
ENSG00000149639	656.696	-0.286093	0.125123	-2.29006	0.0220176	0.318267	SOGA1	suppressor of glucose, autophagy associated 1 [Source:HGNC Symbol;Acc:HGNC:16111]	protein_coding	coding	36777442	36863686	20	-1	chromosome
ENSG00000105607	249.336	-0.310507	0.135146	-2.28808	0.0221326	0.319599	GCDH	glutaryl-CoA dehydrogenase [Source:HGNC Symbol;Acc:HGNC:4189]	protein_coding	coding	12891026	12914207	19	1	chromosome
ENSG00000167264	224.766	0.301163	0.131476	2.2864	0.0222307	0.320686	DUS2	dihydrouridine synthase 2 [Source:HGNC Symbol;Acc:HGNC:26014]	protein_coding	coding	67987746	68079320	16	1	chromosome
ENSG00000079335	86.1847	0.31764	0.139085	2.28589	0.0222605	0.320785	CDC14A	cell division cycle 14A [Source:HGNC Symbol;Acc:HGNC:1718]	protein_coding	coding	100345025	100520277	1	1	chromosome
ENSG00000143321	3651.46	0.151764	0.0664131	2.28543	0.0222878	0.320848	HDGF	heparin binding growth factor [Source:HGNC Symbol;Acc:HGNC:4856]	protein_coding	coding	156742107	156766925	1	-1	chromosome
ENSG00000085788	747.345	-0.229301	0.100399	-2.28229	0.0224723	0.3223	DDHD2	DDHD domain containing 2 [Source:HGNC Symbol;Acc:HGNC:29106]	protein_coding	coding	38225218	38275558	8	1	chromosome
ENSG00000117222	331.698	0.254645	0.111534	2.28329	0.0224134	0.3223	RBBP5	RB binding protein 5, histone lysine methyltransferase complex subunit [Source:HGNC Symbol;Acc:HGNC:9888]	protein_coding	coding	205086142	205122015	1	-1	chromosome
ENSG00000169727	1337.18	-0.169242	0.0741522	-2.28215	0.0224807	0.3223	GPS1	G protein pathway suppressor 1 [Source:HGNC Symbol;Acc:HGNC:4549]	protein_coding	coding	82050691	82057470	17	1	chromosome
ENSG00000257267	340.49	0.25749	0.112916	2.28219	0.022478	0.3223	ZNF271P	zinc finger protein 271, pseudogene [Source:HGNC Symbol;Acc:HGNC:13065]	transcribed_unitary_pseudogene	pseudo	35290282	35328390	18	1	chromosome
ENSG00000054690	158.629	-0.31843	0.139078	-2.28114	0.0225401	0.322529	PLEKHH1	pleckstrin homology, MyTH4 and FERM domain containing H1 [Source:HGNC Symbol;Acc:HGNC:17733]	protein_coding	coding	67533301	67589612	14	1	chromosome
ENSG00000100867	22855.8	-0.12311	0.0540094	-2.27937	0.022645	0.322529	DHRS2	dehydrogenase/reductase 2 [Source:HGNC Symbol;Acc:HGNC:18349]	protein_coding	coding	23630115	23645639	14	1	chromosome
ENSG00000124177	1027.96	-0.2623	0.115019	-2.27914	0.0226586	0.322529	CHD6	chromodomain helicase DNA binding protein 6 [Source:HGNC Symbol;Acc:HGNC:19057]	protein_coding	coding	41402101	41618494	20	-1	chromosome
ENSG00000126456	418.023	-0.281483	0.123196	-2.27893	0.0226709	0.322529	IRF3	interferon regulatory factor 3 [Source:HGNC Symbol;Acc:HGNC:6118]	protein_coding	coding	49659569	49665875	19	-1	chromosome
ENSG00000162104	532.35	-0.227676	0.0998389	-2.27877	0.0226809	0.322529	ADCY9	adenylate cyclase 9 [Source:HGNC Symbol;Acc:HGNC:240]	protein_coding	coding	3953387	4116185	16	-1	chromosome
ENSG00000213672	238.941	-0.27639	0.121025	-2.28016	0.0225985	0.322529	NCKIPSD	NCK interacting protein with SH3 domain [Source:HGNC Symbol;Acc:HGNC:15486]	protein_coding	coding	48673844	48686364	3	-1	chromosome
ENSG00000240972	2161.14	-0.22714	0.0995626	-2.28046	0.0225803	0.322529	MIF	macrophage migration inhibitory factor (glycosylation-inhibiting factor) [Source:HGNC Symbol;Acc:HGNC:7097]	protein_coding	coding	23894004	23895227	22	1	chromosome
ENSG00000259479	244.045	0.291672	0.128219	2.28035	0.022587	0.322529	SORD2P	sorbitol dehydrogenase 2, pseudogene [Source:HGNC Symbol;Acc:HGNC:49919]	transcribed_unprocessed_pseudogene	pseudo	44825747	44884694	15	-1	chromosome
ENSG00000167716	368.257	-0.252791	0.110867	-2.27738	0.0227633	0.323373	WDR81	WD repeat domain 81 [Source:HGNC Symbol;Acc:HGNC:26600]	protein_coding	coding	1716523	1738599	17	1	chromosome
ENSG00000162402	1569.85	-0.167564	0.0735837	-2.27656	0.0228124	0.323742	USP24	ubiquitin specific peptidase 24 [Source:HGNC Symbol;Acc:HGNC:12623]	protein_coding	coding	55066359	55215113	1	-1	chromosome
ENSG00000115904	993.317	-0.20872	0.0917348	-2.27446	0.0229384	0.325201	SOS1	SOS Ras/Rac guanine nucleotide exchange factor 1 [Source:HGNC Symbol;Acc:HGNC:11187]	protein_coding	coding	38981396	39124345	2	-1	chromosome
ENSG00000092108	2169.44	0.159889	0.0703695	2.27229	0.0230692	0.326724	SCFD1	sec1 family domain containing 1 [Source:HGNC Symbol;Acc:HGNC:20726]	protein_coding	coding	30622112	30735812	14	1	chromosome
ENSG00000176046	316.789	-0.310918	0.136463	-2.27067	0.0231669	0.327446	NUPR1	nuclear protein 1, transcriptional regulator [Source:HGNC Symbol;Acc:HGNC:29990]	protein_coding	coding	28532708	28539174	16	-1	chromosome
ENSG00000225921	1478.26	0.163022	0.0717811	2.27101	0.0231465	0.327446	NOL7	nucleolar protein 7 [Source:HGNC Symbol;Acc:HGNC:21040]	protein_coding	coding	13615327	13632739	6	1	chromosome
ENSG00000101544	505.022	-0.275612	0.12121	-2.27025	0.0231923	0.327475	ADNP2	ADNP homeobox 2 [Source:HGNC Symbol;Acc:HGNC:23803]	protein_coding	coding	80109031	80147523	18	1	chromosome
ENSG00000113368	1959.17	0.168566	0.0742969	2.26923	0.0232546	0.328023	LMNB1	lamin B1 [Source:HGNC Symbol;Acc:HGNC:6637]	protein_coding	coding	126776623	126837020	5	1	chromosome
ENSG00000156675	560.651	-0.220902	0.0972851	-2.26857	0.0232942	0.328023	RAB11FIP1	RAB11 family interacting protein 1 [Source:HGNC Symbol;Acc:HGNC:30265]	protein_coding	coding	37858618	37899467	8	-1	chromosome
ENSG00000268205	69.7115	0.312315	0.137307	2.26846	0.0233014	0.328023	AC005261.2	NA	lincRNA	noncoding	57304305	57308562	19	1	chromosome
ENSG00000140332	222.592	-0.30762	0.136083	-2.2667	0.0234085	0.3292	TLE3	transducin like enhancer of split 3 [Source:HGNC Symbol;Acc:HGNC:11839]	protein_coding	coding	70047790	70098176	15	-1	chromosome
ENSG00000042445	1000.11	-0.18143	0.0801245	-2.26326	0.0236197	0.330531	RETSAT	retinol saturase [Source:HGNC Symbol;Acc:HGNC:25991]	protein_coding	coding	85342088	85354620	2	-1	chromosome
ENSG00000114331	505.747	0.314141	0.139404	2.26394	0.0235778	0.330531	ACAP2	ArfGAP with coiled-coil, ankyrin repeat and PH domains 2 [Source:HGNC Symbol;Acc:HGNC:16469]	protein_coding	coding	195274736	195443078	3	-1	chromosome
ENSG00000117385	1022.53	-0.175826	0.0776072	-2.2647	0.0235313	0.330531	P3H1	prolyl 3-hydroxylase 1 [Source:HGNC Symbol;Acc:HGNC:19316]	protein_coding	coding	42746335	42767084	1	-1	chromosome
ENSG00000133226	1172.46	0.244633	0.108138	2.26414	0.0235656	0.330531	SRRM1	serine and arginine repetitive matrix 1 [Source:HGNC Symbol;Acc:HGNC:16638]	protein_coding	coding	24631716	24673267	1	1	chromosome
ENSG00000161970	9373.49	-0.140021	0.0618635	-2.26324	0.0236212	0.330531	RPL26	ribosomal protein L26 [Source:HGNC Symbol;Acc:HGNC:10327]	protein_coding	coding	8377520	8383213	17	-1	chromosome
ENSG00000106066	1214.09	0.174076	0.0769579	2.2624	0.0236728	0.330782	CPVL	carboxypeptidase, vitellogenic like [Source:HGNC Symbol;Acc:HGNC:14399]	protein_coding	coding	28995231	29195451	7	-1	chromosome
ENSG00000132563	88.6575	0.310096	0.138311	2.26218	0.0236863	0.330782	REEP2	receptor accessory protein 2 [Source:HGNC Symbol;Acc:HGNC:17975]	protein_coding	coding	138439017	138446969	5	1	chromosome
ENSG00000174791	90.6058	0.31238	0.13868	2.26128	0.0237422	0.330902	RIN1	Ras and Rab interactor 1 [Source:HGNC Symbol;Acc:HGNC:18749]	protein_coding	coding	66330242	66336840	11	-1	chromosome
ENSG00000235897	11.9008	-0.159745	0.0813204	-2.26141	0.0237337	0.330902	TM4SF19-AS1	TM4SF19 antisense RNA 1 [Source:HGNC Symbol;Acc:HGNC:41085]	antisense_RNA	other	196318330	196325570	3	1	chromosome
ENSG00000067596	931.546	-0.179999	0.0796094	-2.2605	0.0237905	0.331246	DHX8	DEAH-box helicase 8 [Source:HGNC Symbol;Acc:HGNC:2749]	protein_coding	coding	43483865	43544463	17	1	chromosome
ENSG00000122958	965.21	-0.229298	0.101394	-2.25943	0.0238568	0.331839	VPS26A	VPS26, retromer complex component A [Source:HGNC Symbol;Acc:HGNC:12711]	protein_coding	coding	69123512	69172861	10	1	chromosome
ENSG00000178057	319.121	-0.281497	0.124486	-2.25798	0.0239466	0.332759	NDUFAF3	NADH:ubiquinone oxidoreductase complex assembly factor 3 [Source:HGNC Symbol;Acc:HGNC:29918]	protein_coding	coding	49020459	49023495	3	1	chromosome
ENSG00000262304	97.2775	-0.300317	0.132598	-2.25736	0.0239857	0.332971	AC027796.3	NA	protein_coding	coding	3585149	3636249	17	-1	chromosome
ENSG00000203999	78.6492	-0.313403	0.139435	-2.25688	0.0240155	0.333055	LINC01270	long intergenic non-protein coding RNA 1270 [Source:HGNC Symbol;Acc:HGNC:27658]	lincRNA	noncoding	50292720	50314922	20	1	chromosome
ENSG00000196632	26.9812	0.22312	0.101146	2.25636	0.024048	0.333175	WNK3	WNK lysine deficient protein kinase 3 [Source:HGNC Symbol;Acc:HGNC:14543]	protein_coding	coding	54192823	54358642	X	-1	chromosome
ENSG00000132383	1315.82	-0.25374	0.11242	-2.25528	0.0241156	0.333589	RPA1	replication protein A1 [Source:HGNC Symbol;Acc:HGNC:10289]	protein_coding	coding	1829702	1900082	17	1	chromosome
ENSG00000138767	434.52	-0.254775	0.112765	-2.25512	0.0241255	0.333589	CNOT6L	CCR4-NOT transcription complex subunit 6 like [Source:HGNC Symbol;Acc:HGNC:18042]	protein_coding	coding	77713387	77819615	4	-1	chromosome
ENSG00000121931	712.431	0.229134	0.101614	2.25442	0.0241696	0.333869	LRIF1	ligand dependent nuclear receptor interacting factor 1 [Source:HGNC Symbol;Acc:HGNC:30299]	protein_coding	coding	110947185	110964079	1	-1	chromosome
ENSG00000105245	28.6132	0.207579	0.0971199	2.25343	0.0242317	0.334069	NUMBL	NUMB like, endocytic adaptor protein [Source:HGNC Symbol;Acc:HGNC:8061]	protein_coding	coding	40665905	40690972	19	-1	chromosome
ENSG00000257550	22.2066	0.0346112	0.0306203	2.25363	0.0242197	0.334069	AC023509.2	NA	antisense_RNA	other	53513984	53517608	12	1	chromosome
ENSG00000234996	18.1992	-0.239775	0.10912	-2.25283	0.0242697	0.334264	AC098934.2	NA	transcribed_processed_pseudogene	pseudo	202861754	202875241	1	1	chromosome
ENSG00000119048	691.988	0.223972	0.0994171	2.25236	0.0242995	0.334345	UBE2B	ubiquitin conjugating enzyme E2 B [Source:HGNC Symbol;Acc:HGNC:12473]	protein_coding	coding	134371179	134391992	5	1	chromosome
ENSG00000078369	3847.24	-0.193166	0.0857809	-2.25195	0.0243252	0.33437	GNB1	G protein subunit beta 1 [Source:HGNC Symbol;Acc:HGNC:4396]	protein_coding	coding	1785285	1891117	1	-1	chromosome
ENSG00000169764	1831.63	0.180575	0.0801925	2.2515	0.0243538	0.334434	UGP2	UDP-glucose pyrophosphorylase 2 [Source:HGNC Symbol;Acc:HGNC:12527]	protein_coding	coding	63840940	63891562	2	1	chromosome
ENSG00000174780	1606.17	-0.192021	0.0853456	-2.24886	0.0245215	0.336409	SRP72	signal recognition particle 72 [Source:HGNC Symbol;Acc:HGNC:11303]	protein_coding	coding	56466915	56503680	4	1	chromosome
ENSG00000006016	2123.61	0.181291	0.0806599	2.24777	0.024591	0.336681	CRLF1	cytokine receptor like factor 1 [Source:HGNC Symbol;Acc:HGNC:2364]	protein_coding	coding	18572220	18607741	19	-1	chromosome
ENSG00000089057	2260.89	-0.146463	0.0651449	-2.24799	0.0245766	0.336681	SLC23A2	solute carrier family 23 member 2 [Source:HGNC Symbol;Acc:HGNC:10973]	protein_coding	coding	4852356	5010293	20	-1	chromosome
ENSG00000112029	621.497	0.226209	0.100753	2.24678	0.0246544	0.336681	FBXO5	F-box protein 5 [Source:HGNC Symbol;Acc:HGNC:13584]	protein_coding	coding	152970519	152983579	6	-1	chromosome
ENSG00000119661	154.686	0.281391	0.12721	2.24666	0.0246616	0.336681	DNAL1	dynein axonemal light chain 1 [Source:HGNC Symbol;Acc:HGNC:23247]	protein_coding	coding	73644875	73703732	14	1	chromosome
ENSG00000129315	618.673	0.256444	0.114071	2.24697	0.024642	0.336681	CCNT1	cyclin T1 [Source:HGNC Symbol;Acc:HGNC:1599]	protein_coding	coding	48688458	48716998	12	-1	chromosome
ENSG00000075292	1620.98	0.172768	0.0769712	2.24477	0.0247832	0.337729	ZNF638	zinc finger protein 638 [Source:HGNC Symbol;Acc:HGNC:17894]	protein_coding	coding	71276561	71435069	2	1	chromosome
ENSG00000090013	160.083	-0.302248	0.134081	-2.24471	0.0247866	0.337729	BLVRB	biliverdin reductase B [Source:HGNC Symbol;Acc:HGNC:1063]	protein_coding	coding	40447789	40465840	19	-1	chromosome
ENSG00000106636	920.999	-0.190576	0.0849033	-2.24329	0.024878	0.338645	YKT6	YKT6 v-SNARE homolog [Source:HGNC Symbol;Acc:HGNC:16959]	protein_coding	coding	44200968	44214294	7	1	chromosome
ENSG00000050820	792.33	-0.24988	0.111408	-2.24088	0.0250338	0.340436	BCAR1	BCAR1, Cas family scaffolding protein [Source:HGNC Symbol;Acc:HGNC:971]	protein_coding	coding	75228187	75268053	16	-1	chromosome
ENSG00000011105	513.93	-0.287853	0.12874	-2.2403	0.0250715	0.340617	TSPAN9	tetraspanin 9 [Source:HGNC Symbol;Acc:HGNC:21640]	protein_coding	coding	3077355	3286564	12	1	chromosome
ENSG00000139344	147.325	0.309104	0.138754	2.23916	0.0251455	0.341292	AMDHD1	amidohydrolase domain containing 1 [Source:HGNC Symbol;Acc:HGNC:28577]	protein_coding	coding	95943293	95968716	12	1	chromosome
ENSG00000164068	495.201	-0.247348	0.110438	-2.23699	0.025287	0.341887	RNF123	ring finger protein 123 [Source:HGNC Symbol;Acc:HGNC:21148]	protein_coding	coding	49689499	49721529	3	1	chromosome
ENSG00000175147	56.133	-0.310228	0.138531	-2.23711	0.0252791	0.341887	TMEM51-AS1	TMEM51 antisense RNA 1 [Source:HGNC Symbol;Acc:HGNC:26301]	antisense_RNA	other	15111815	15152464	1	-1	chromosome
ENSG00000186468	8262.77	-0.139523	0.0623553	-2.2374	0.0252601	0.341887	RPS23	ribosomal protein S23 [Source:HGNC Symbol;Acc:HGNC:10410]	protein_coding	coding	82273358	82278577	5	-1	chromosome
ENSG00000215440	146.707	0.309262	0.139114	2.23712	0.0252788	0.341887	NPEPL1	aminopeptidase like 1 [Source:HGNC Symbol;Acc:HGNC:16244]	protein_coding	coding	58689131	58719238	20	1	chromosome
ENSG00000013288	272.918	-0.283773	0.126637	-2.23499	0.0254183	0.341922	MAN2B2	mannosidase alpha class 2B member 2 [Source:HGNC Symbol;Acc:HGNC:29623]	protein_coding	coding	6575175	6623362	4	1	chromosome
ENSG00000061656	37.9969	0.298683	0.133871	2.23607	0.0253471	0.341922	SPAG4	sperm associated antigen 4 [Source:HGNC Symbol;Acc:HGNC:11214]	protein_coding	coding	35615892	35621049	20	1	chromosome
ENSG00000090520	1897.16	0.224899	0.100575	2.23543	0.0253894	0.341922	DNAJB11	DnaJ heat shock protein family (Hsp40) member B11 [Source:HGNC Symbol;Acc:HGNC:14889]	protein_coding	coding	186567403	186585800	3	1	chromosome
ENSG00000122515	248.237	-0.302828	0.136034	-2.23115	0.0256711	0.341922	ZMIZ2	zinc finger MIZ-type containing 2 [Source:HGNC Symbol;Acc:HGNC:22229]	protein_coding	coding	44748581	44769881	7	1	chromosome
ENSG00000137497	1374.17	-0.193389	0.0866024	-2.23207	0.0256103	0.341922	NUMA1	nuclear mitotic apparatus protein 1 [Source:HGNC Symbol;Acc:HGNC:8059]	protein_coding	coding	72002864	72080693	11	-1	chromosome
ENSG00000151690	56.7999	0.283689	0.128216	2.23101	0.0256802	0.341922	MFSD6	major facilitator superfamily domain containing 6 [Source:HGNC Symbol;Acc:HGNC:24711]	protein_coding	coding	190408355	190509205	2	1	chromosome
ENSG00000153922	879.614	0.257617	0.115269	2.23474	0.0254344	0.341922	CHD1	chromodomain helicase DNA binding protein 1 [Source:HGNC Symbol;Acc:HGNC:1915]	protein_coding	coding	98853985	98928957	5	-1	chromosome
ENSG00000164332	385.235	0.232175	0.10402	2.23352	0.0255148	0.341922	UBLCP1	ubiquitin like domain containing CTD phosphatase 1 [Source:HGNC Symbol;Acc:HGNC:28110]	protein_coding	coding	159263081	159286040	5	1	chromosome
ENSG00000179010	3416.57	0.129444	0.057947	2.23389	0.0254903	0.341922	MRFAP1	Morf4 family associated protein 1 [Source:HGNC Symbol;Acc:HGNC:24549]	protein_coding	coding	6640091	6642745	4	1	chromosome
ENSG00000183196	33.6619	-0.255415	0.114565	-2.23252	0.0255806	0.341922	CHST6	carbohydrate sulfotransferase 6 [Source:HGNC Symbol;Acc:HGNC:6938]	protein_coding	coding	75472052	75495384	16	-1	chromosome
ENSG00000184787	1026.89	-0.210466	0.0943422	-2.23148	0.0256493	0.341922	UBE2G2	ubiquitin conjugating enzyme E2 G2 [Source:HGNC Symbol;Acc:HGNC:12483]	protein_coding	coding	44768580	44802019	21	-1	chromosome
ENSG00000204569	605.182	-0.237133	0.106109	-2.23314	0.0255394	0.341922	PPP1R10	protein phosphatase 1 regulatory subunit 10 [Source:HGNC Symbol;Acc:HGNC:9284]	protein_coding	coding	30600400	30618612	6	-1	chromosome
ENSG00000239789	331.678	-0.277883	0.124105	-2.2343	0.0254631	0.341922	MRPS17	mitochondrial ribosomal protein S17 [Source:HGNC Symbol;Acc:HGNC:14047]	protein_coding	coding	55951819	55956501	7	1	chromosome
ENSG00000248458	12.7049	0.171051	0.0829607	2.23207	0.0256107	0.341922	AL139147.1	NA	antisense_RNA	other	66665864	66677027	1	-1	chromosome
ENSG00000250120	24.0146	0.0490458	0.0369804	2.23502	0.0254157	0.341922	PCDHA10	protocadherin alpha 10 [Source:HGNC Symbol;Acc:HGNC:8664]	protein_coding	coding	140855883	141012344	5	1	chromosome
ENSG00000261071	16.2229	-0.23125	0.106174	-2.23232	0.0255936	0.341922	AL441883.1	NA	antisense_RNA	other	13614111	13615155	6	-1	chromosome
ENSG00000085978	709.138	-0.218239	0.0979364	-2.22886	0.0258235	0.343504	ATG16L1	autophagy related 16 like 1 [Source:HGNC Symbol;Acc:HGNC:21498]	protein_coding	coding	233210051	233295674	2	1	chromosome
ENSG00000067900	923.364	0.216773	0.0974142	2.22639	0.025988	0.344205	ROCK1	Rho associated coiled-coil containing protein kinase 1 [Source:HGNC Symbol;Acc:HGNC:10251]	protein_coding	coding	20946906	21111851	18	-1	chromosome
ENSG00000068001	827.132	-0.226604	0.101657	-2.22765	0.0259041	0.344205	HYAL2	hyaluronoglucosaminidase 2 [Source:HGNC Symbol;Acc:HGNC:5321]	protein_coding	coding	50317790	50322906	3	-1	chromosome
ENSG00000132646	6774.65	0.128866	0.0578848	2.22623	0.025999	0.344205	PCNA	proliferating cell nuclear antigen [Source:HGNC Symbol;Acc:HGNC:8729]	protein_coding	coding	5114953	5126626	20	-1	chromosome
ENSG00000158470	1078.8	-0.170429	0.0764993	-2.22699	0.0259478	0.344205	B4GALT5	beta-1,4-galactosyltransferase 5 [Source:HGNC Symbol;Acc:HGNC:928]	protein_coding	coding	49632945	49713878	20	-1	chromosome
ENSG00000166797	744.48	0.202712	0.091038	2.22639	0.0259882	0.344205	FAM96A	family with sequence similarity 96 member A [Source:HGNC Symbol;Acc:HGNC:26235]	protein_coding	coding	64072559	64094018	15	-1	chromosome
ENSG00000160753	265.625	0.284397	0.127979	2.22514	0.026072	0.34463	RUSC1	RUN and SH3 domain containing 1 [Source:HGNC Symbol;Acc:HGNC:17153]	protein_coding	coding	155320896	155331114	1	1	chromosome
ENSG00000175567	113.195	-0.300625	0.137121	-2.22501	0.0260804	0.34463	UCP2	uncoupling protein 2 [Source:HGNC Symbol;Acc:HGNC:12518]	protein_coding	coding	73974667	73983307	11	-1	chromosome
ENSG00000147677	2619.64	-0.197404	0.0887351	-2.22374	0.0261659	0.345435	EIF3H	eukaryotic translation initiation factor 3 subunit H [Source:HGNC Symbol;Acc:HGNC:3273]	protein_coding	coding	116642130	116766925	8	-1	chromosome
ENSG00000099956	780.584	-0.228849	0.102862	-2.22218	0.0262713	0.345737	SMARCB1	SWI/SNF related, matrix associated, actin dependent regulator of chromatin, subfamily b, member 1 [Source:HGNC Symbol;Acc:HGNC:11103]	protein_coding	coding	23786963	23834516	22	1	chromosome
ENSG00000100997	912.103	-0.206755	0.092991	-2.22194	0.0262875	0.345737	ABHD12	abhydrolase domain containing 12 [Source:HGNC Symbol;Acc:HGNC:15868]	protein_coding	coding	25294743	25390983	20	-1	chromosome
ENSG00000141576	51.4345	0.274942	0.125129	2.22236	0.0262591	0.345737	RNF157	ring finger protein 157 [Source:HGNC Symbol;Acc:HGNC:29402]	protein_coding	coding	76142453	76240373	17	-1	chromosome
ENSG00000187672	14.2458	0.108499	0.05946	2.22255	0.0262464	0.345737	ERC2	ELKS/RAB6-interacting/CAST family member 2 [Source:HGNC Symbol;Acc:HGNC:31922]	protein_coding	coding	55508308	56468363	3	-1	chromosome
ENSG00000111775	1507.2	-0.175687	0.0790855	-2.22087	0.02636	0.346364	COX6A1	cytochrome c oxidase subunit 6A1 [Source:HGNC Symbol;Acc:HGNC:2277]	protein_coding	coding	120438090	120440742	12	1	chromosome
ENSG00000130203	7286.65	-0.130132	0.0586732	-2.21774	0.0265725	0.347438	APOE	apolipoprotein E [Source:HGNC Symbol;Acc:HGNC:613]	protein_coding	coding	44905754	44909393	19	1	chromosome
ENSG00000135930	1099.69	-0.206219	0.0928987	-2.21825	0.0265379	0.347438	EIF4E2	eukaryotic translation initiation factor 4E family member 2 [Source:HGNC Symbol;Acc:HGNC:3293]	protein_coding	coding	232550052	232583644	2	1	chromosome
ENSG00000149089	464.764	0.307789	0.139417	2.21789	0.0265626	0.347438	APIP	APAF1 interacting protein [Source:HGNC Symbol;Acc:HGNC:17581]	protein_coding	coding	34853094	34916499	11	-1	chromosome
ENSG00000161944	3264.59	-0.152177	0.0686143	-2.21748	0.0265905	0.347438	ASGR2	asialoglycoprotein receptor 2 [Source:HGNC Symbol;Acc:HGNC:743]	protein_coding	coding	7101322	7115700	17	-1	chromosome
ENSG00000164989	28.1322	-0.261197	0.117826	-2.21849	0.0265216	0.347438	CCDC171	coiled-coil domain containing 171 [Source:HGNC Symbol;Acc:HGNC:29828]	protein_coding	coding	15553086	16061663	9	1	chromosome
ENSG00000175279	181.668	0.286095	0.129207	2.21871	0.0265062	0.347438	CENPS	centromere protein S [Source:HGNC Symbol;Acc:HGNC:23163]	protein_coding	coding	10430443	10442809	1	1	chromosome
ENSG00000139233	485.605	0.248009	0.112049	2.21697	0.0266252	0.347567	LLPH	LLP homolog, long-term synaptic facilitation [Source:HGNC Symbol;Acc:HGNC:28229]	protein_coding	coding	66116555	66130768	12	-1	chromosome
ENSG00000003509	476.081	0.226916	0.10248	2.21629	0.0266717	0.347849	NDUFAF7	NADH:ubiquinone oxidoreductase complex assembly factor 7 [Source:HGNC Symbol;Acc:HGNC:28816]	protein_coding	coding	37231631	37253403	2	1	chromosome
ENSG00000130208	1945.08	0.184588	0.0833527	2.21429	0.0268085	0.348985	APOC1	apolipoprotein C1 [Source:HGNC Symbol;Acc:HGNC:607]	protein_coding	coding	44914247	44919349	19	1	chromosome
ENSG00000251637	11.9838	0.134436	0.06958	2.21438	0.0268029	0.348985	AP003716.1	NA	lincRNA	noncoding	67886477	67906350	11	1	chromosome
ENSG00000090615	893.656	-0.244462	0.110415	-2.21343	0.0268678	0.349431	GOLGA3	golgin A3 [Source:HGNC Symbol;Acc:HGNC:4426]	protein_coding	coding	132768909	132828858	12	-1	chromosome
ENSG00000187244	1221.11	-0.172864	0.0781027	-2.21293	0.0269026	0.349559	BCAM	basal cell adhesion molecule (Lutheran blood group) [Source:HGNC Symbol;Acc:HGNC:6722]	protein_coding	coding	44809059	44821420	19	1	chromosome
ENSG00000167081	156.505	0.30459	0.138347	2.21195	0.0269699	0.350109	PBX3	PBX homeobox 3 [Source:HGNC Symbol;Acc:HGNC:8634]	protein_coding	coding	125747345	125967377	9	1	chromosome
ENSG00000132164	482.256	-0.268412	0.121172	-2.21093	0.0270404	0.350375	SLC6A11	solute carrier family 6 member 11 [Source:HGNC Symbol;Acc:HGNC:11044]	protein_coding	coding	10816200	10940733	3	1	chromosome
ENSG00000150527	1692.12	0.171877	0.0777235	2.21116	0.0270246	0.350375	CTAGE5	CTAGE family member 5, ER export factor [Source:HGNC Symbol;Acc:HGNC:7057]	protein_coding	coding	39230231	39388513	14	1	chromosome
ENSG00000117593	666.864	0.216063	0.0979154	2.2084	0.0272166	0.350711	DARS2	aspartyl-tRNA synthetase 2, mitochondrial [Source:HGNC Symbol;Acc:HGNC:25538]	protein_coding	coding	173824503	173858546	1	1	chromosome
ENSG00000138161	16.3881	0.227864	0.105185	2.20873	0.0271935	0.350711	CUZD1	CUB and zona pellucida like domains 1 [Source:HGNC Symbol;Acc:HGNC:17937]	protein_coding	coding	122832149	122850793	10	-1	chromosome
ENSG00000164040	1216.77	0.202149	0.0914973	2.20923	0.0271586	0.350711	PGRMC2	progesterone receptor membrane component 2 [Source:HGNC Symbol;Acc:HGNC:16089]	protein_coding	coding	128269237	128288829	4	-1	chromosome
ENSG00000167711	3713.98	-0.138996	0.0629209	-2.20877	0.0271908	0.350711	SERPINF2	serpin family F member 2 [Source:HGNC Symbol;Acc:HGNC:9075]	protein_coding	coding	1742836	1755268	17	1	chromosome
ENSG00000196792	1129.54	-0.173961	0.0787408	-2.20863	0.0272003	0.350711	STRN3	striatin 3 [Source:HGNC Symbol;Acc:HGNC:15720]	protein_coding	coding	30893799	31026401	14	-1	chromosome
ENSG00000239887	222.351	0.285672	0.129171	2.20942	0.0271458	0.350711	C1orf226	chromosome 1 open reading frame 226 [Source:HGNC Symbol;Acc:HGNC:34351]	protein_coding	coding	162366908	162386818	1	1	chromosome
ENSG00000146729	686.238	0.225287	0.102091	2.20789	0.0272521	0.350846	NIPSNAP2	nipsnap homolog 2 [Source:HGNC Symbol;Acc:HGNC:4179]	protein_coding	coding	55951793	56000181	7	1	chromosome
ENSG00000184178	189.375	0.306047	0.139207	2.20706	0.0273098	0.351266	SCFD2	sec1 family domain containing 2 [Source:HGNC Symbol;Acc:HGNC:30676]	protein_coding	coding	52872982	53366075	4	-1	chromosome
ENSG00000030582	1828.5	-0.198741	0.0900406	-2.20613	0.0273749	0.35178	GRN	granulin precursor [Source:HGNC Symbol;Acc:HGNC:4601]	protein_coding	coding	44345086	44353102	17	1	chromosome
ENSG00000125875	996.007	-0.213407	0.0967496	-2.20477	0.02747	0.352679	TBC1D20	TBC1 domain family member 20 [Source:HGNC Symbol;Acc:HGNC:16133]	protein_coding	coding	435480	462553	20	-1	chromosome
ENSG00000204852	171.183	0.304404	0.139114	2.20372	0.0275441	0.353306	TCTN1	tectonic family member 1 [Source:HGNC Symbol;Acc:HGNC:26113]	protein_coding	coding	110614027	110649430	12	1	chromosome
ENSG00000147400	787.617	0.214202	0.0972196	2.20299	0.0275953	0.353639	CETN2	centrin 2 [Source:HGNC Symbol;Acc:HGNC:1867]	protein_coding	coding	152826973	152830777	X	-1	chromosome
ENSG00000079387	332.535	0.270749	0.123198	2.20226	0.0276473	0.353981	SENP1	SUMO1/sentrin specific peptidase 1 [Source:HGNC Symbol;Acc:HGNC:17927]	protein_coding	coding	48042898	48106308	12	-1	chromosome
ENSG00000272869	48.5811	0.214134	0.102039	2.20151	0.0277003	0.354336	AC008575.2	NA	protein_coding	coding	112861188	112893079	5	1	chromosome
ENSG00000100583	20.0993	0.187372	0.0908499	2.19948	0.0278441	0.355039	SAMD15	sterile alpha motif domain containing 15 [Source:HGNC Symbol;Acc:HGNC:18631]	protein_coding	coding	77376689	77391497	14	1	chromosome
ENSG00000116857	375.971	-0.284029	0.128817	-2.20002	0.0278055	0.355039	TMEM9	transmembrane protein 9 [Source:HGNC Symbol;Acc:HGNC:18823]	protein_coding	coding	201134772	201171574	1	-1	chromosome
ENSG00000159128	755.646	0.241609	0.109784	2.1993	0.0278566	0.355039	IFNGR2	interferon gamma receptor 2 [Source:HGNC Symbol;Acc:HGNC:5440]	protein_coding	coding	33402896	33479348	21	1	chromosome
ENSG00000167107	586.77	-0.248725	0.112905	-2.19985	0.0278172	0.355039	ACSF2	acyl-CoA synthetase family member 2 [Source:HGNC Symbol;Acc:HGNC:26101]	protein_coding	coding	50426158	50474845	17	1	chromosome
ENSG00000259112	18.3971	0.125063	0.0660583	2.19864	0.0279036	0.355315	NDUFC2-KCTD14	NDUFC2-KCTD14 readthrough [Source:HGNC Symbol;Acc:HGNC:42956]	protein_coding	coding	78016971	78079865	11	-1	chromosome
ENSG00000137500	451.231	0.234974	0.106978	2.19716	0.0280087	0.356329	CCDC90B	coiled-coil domain containing 90B [Source:HGNC Symbol;Acc:HGNC:28108]	protein_coding	coding	83259097	83286407	11	-1	chromosome
ENSG00000166598	24968.3	0.150757	0.0686736	2.19525	0.0281456	0.357745	HSP90B1	heat shock protein 90 beta family member 1 [Source:HGNC Symbol;Acc:HGNC:12028]	protein_coding	coding	103930107	103953645	12	1	chromosome
ENSG00000131462	1174.39	-0.168426	0.0767303	-2.19473	0.028183	0.357896	TUBG1	tubulin gamma 1 [Source:HGNC Symbol;Acc:HGNC:12417]	protein_coding	coding	42609676	42615234	17	1	chromosome
ENSG00000058600	1295.64	-0.222574	0.101444	-2.19394	0.0282397	0.358291	POLR3E	RNA polymerase III subunit E [Source:HGNC Symbol;Acc:HGNC:30347]	protein_coding	coding	22297375	22335103	16	1	chromosome
ENSG00000119888	2054.24	0.170558	0.0777654	2.19333	0.0282836	0.358523	EPCAM	epithelial cell adhesion molecule [Source:HGNC Symbol;Acc:HGNC:11529]	protein_coding	coding	47345158	47387601	2	1	chromosome
ENSG00000082458	304.023	-0.270359	0.123177	-2.19258	0.0283376	0.358748	DLG3	discs large MAGUK scaffold protein 3 [Source:HGNC Symbol;Acc:HGNC:2902]	protein_coding	coding	70444861	70505490	X	1	chromosome
ENSG00000115839	1186.76	0.161934	0.0738919	2.19209	0.0283733	0.358748	RAB3GAP1	RAB3 GTPase activating protein catalytic subunit 1 [Source:HGNC Symbol;Acc:HGNC:17063]	protein_coding	coding	135052265	135176394	2	1	chromosome
ENSG00000161671	13.7543	-0.124961	0.0680317	-2.19166	0.0284037	0.358748	EMC10	ER membrane protein complex subunit 10 [Source:HGNC Symbol;Acc:HGNC:27609]	protein_coding	coding	50476400	50490870	19	1	chromosome
ENSG00000198818	917.508	-0.195405	0.0890859	-2.19191	0.0283863	0.358748	SFT2D1	SFT2 domain containing 1 [Source:HGNC Symbol;Acc:HGNC:21102]	protein_coding	coding	166319728	166342591	6	-1	chromosome
ENSG00000143228	479.38	0.283997	0.129841	2.19102	0.0284507	0.359017	NUF2	NUF2, NDC80 kinetochore complex component [Source:HGNC Symbol;Acc:HGNC:14621]	protein_coding	coding	163266576	163355764	1	1	chromosome
ENSG00000111339	355.462	0.2968	0.136572	2.19038	0.0284968	0.359151	ART4	ADP-ribosyltransferase 4 (Dombrock blood group) [Source:HGNC Symbol;Acc:HGNC:726]	protein_coding	coding	14825569	14843495	12	-1	chromosome
ENSG00000122783	421.975	-0.246769	0.112601	-2.19016	0.0285126	0.359151	C7orf49	chromosome 7 open reading frame 49 [Source:HGNC Symbol;Acc:HGNC:22432]	protein_coding	coding	135092363	135170795	7	-1	chromosome
ENSG00000070371	202.84	0.292264	0.134862	2.18941	0.0285667	0.359276	CLTCL1	clathrin heavy chain like 1 [Source:HGNC Symbol;Acc:HGNC:2093]	protein_coding	coding	19179473	19291716	22	-1	chromosome
ENSG00000119711	502.758	-0.213094	0.0973127	-2.18896	0.0285995	0.359276	ALDH6A1	aldehyde dehydrogenase 6 family member A1 [Source:HGNC Symbol;Acc:HGNC:7179]	protein_coding	coding	74056850	74084493	14	-1	chromosome
ENSG00000182873	13.393	-0.204025	0.0975966	-2.189	0.0285968	0.359276	PRKCZ-AS1	PRKCZ antisense RNA 1 [Source:HGNC Symbol;Acc:HGNC:40477]	antisense_RNA	other	2181794	2184389	1	-1	chromosome
ENSG00000225697	514.934	-0.214605	0.098049	-2.1886	0.0286259	0.359286	SLC26A6	solute carrier family 26 member 6 [Source:HGNC Symbol;Acc:HGNC:14472]	protein_coding	coding	48625723	48635493	3	-1	chromosome
ENSG00000203690	21.4999	0.10447	0.0588117	2.18824	0.0286523	0.359295	TCP10	t-complex 10 [Source:HGNC Symbol;Acc:HGNC:11656]	protein_coding	coding	167357031	167384510	6	-1	chromosome
ENSG00000156398	273.386	-0.282274	0.128856	-2.18785	0.0286802	0.359323	SFXN2	sideroflexin 2 [Source:HGNC Symbol;Acc:HGNC:16086]	protein_coding	coding	102714538	102743492	10	1	chromosome
ENSG00000166847	3208.95	-0.146352	0.0669177	-2.18712	0.0287337	0.359351	DCTN5	dynactin subunit 5 [Source:HGNC Symbol;Acc:HGNC:24594]	protein_coding	coding	23641392	23677455	16	1	chromosome
ENSG00000229729	47.0849	0.281524	0.130046	2.18723	0.0287256	0.359351	NA	NA	NA	NA	NA	NA	NA	NA	NA
ENSG00000116478	1718.43	-0.154445	0.0706247	-2.18627	0.028796	0.359809	HDAC1	histone deacetylase 1 [Source:HGNC Symbol;Acc:HGNC:4852]	protein_coding	coding	32292086	32333635	1	1	chromosome
ENSG00000141002	900.54	-0.199008	0.0910219	-2.18584	0.0288273	0.359879	TCF25	transcription factor 25 [Source:HGNC Symbol;Acc:HGNC:29181]	protein_coding	coding	89873570	89913627	16	1	chromosome
ENSG00000162607	1193.54	0.187957	0.086041	2.18542	0.0288583	0.359945	USP1	ubiquitin specific peptidase 1 [Source:HGNC Symbol;Acc:HGNC:12607]	protein_coding	coding	62436297	62451804	1	1	chromosome
ENSG00000169057	362.307	0.299524	0.137448	2.18432	0.0289388	0.360628	MECP2	methyl-CpG binding protein 2 [Source:HGNC Symbol;Acc:HGNC:6990]	protein_coding	coding	154021573	154137103	X	-1	chromosome
ENSG00000088836	231.264	-0.290536	0.132941	-2.18322	0.0290193	0.361309	SLC4A11	solute carrier family 4 member 11 [Source:HGNC Symbol;Acc:HGNC:16438]	protein_coding	coding	3227417	3239190	20	-1	chromosome
ENSG00000075702	279.054	-0.264438	0.120991	-2.1818	0.0291244	0.36167	WDR62	WD repeat domain 62 [Source:HGNC Symbol;Acc:HGNC:24502]	protein_coding	coding	36054881	36105106	19	1	chromosome
ENSG00000103194	1346.14	0.206894	0.0948789	2.18178	0.0291257	0.36167	USP10	ubiquitin specific peptidase 10 [Source:HGNC Symbol;Acc:HGNC:12608]	protein_coding	coding	84699978	84779922	16	1	chromosome
ENSG00000162909	429.438	0.294968	0.135605	2.18241	0.0290795	0.36167	CAPN2	calpain 2 [Source:HGNC Symbol;Acc:HGNC:1479]	protein_coding	coding	223701593	223776018	1	1	chromosome
ENSG00000139146	1424.74	0.240955	0.110493	2.18137	0.0291562	0.361698	FAM60A	family with sequence similarity 60 member A [Source:HGNC Symbol;Acc:HGNC:30702]	protein_coding	coding	31280584	31327058	12	-1	chromosome
ENSG00000152492	1369.16	0.152805	0.070068	2.18105	0.0291796	0.361698	CCDC50	coiled-coil domain containing 50 [Source:HGNC Symbol;Acc:HGNC:18111]	protein_coding	coding	191329077	191398670	3	1	chromosome
ENSG00000056097	2083.47	0.165664	0.0760015	2.18003	0.0292553	0.362316	ZFR	zinc finger RNA binding protein [Source:HGNC Symbol;Acc:HGNC:17277]	protein_coding	coding	32354350	32444761	5	-1	chromosome
ENSG00000068078	2338.16	-0.19507	0.0894998	-2.17875	0.0293506	0.362699	FGFR3	fibroblast growth factor receptor 3 [Source:HGNC Symbol;Acc:HGNC:3690]	protein_coding	coding	1793307	1808872	4	1	chromosome
ENSG00000099625	17.6322	-0.22971	0.107821	-2.17752	0.0294416	0.362699	CBARP	CACN beta subunit associated regulatory protein [Source:HGNC Symbol;Acc:HGNC:28617]	protein_coding	coding	1228287	1238027	19	-1	chromosome
ENSG00000115241	2838.83	-0.149449	0.0685665	-2.17921	0.0293157	0.362699	PPM1G	protein phosphatase, Mg2+/Mn2+ dependent 1G [Source:HGNC Symbol;Acc:HGNC:9278]	protein_coding	coding	27381194	27409687	2	-1	chromosome
ENSG00000135074	83.8022	-0.302771	0.139435	-2.17796	0.0294092	0.362699	ADAM19	ADAM metallopeptidase domain 19 [Source:HGNC Symbol;Acc:HGNC:197]	protein_coding	coding	157395534	157575775	5	-1	chromosome
ENSG00000179094	86.4478	0.249429	0.117693	2.17756	0.0294391	0.362699	PER1	period circadian clock 1 [Source:HGNC Symbol;Acc:HGNC:8845]	protein_coding	coding	8140472	8156506	17	-1	chromosome
ENSG00000248307	21.1388	0.0347461	0.0307498	2.17813	0.0293966	0.362699	LINC00616	long intergenic non-protein coding RNA 616 [Source:HGNC Symbol;Acc:HGNC:44065]	lincRNA	noncoding	138027422	138130709	4	-1	chromosome
ENSG00000143952	1638.78	0.190694	0.0876218	2.17709	0.0294742	0.362781	VPS54	VPS54, GARP complex subunit [Source:HGNC Symbol;Acc:HGNC:18652]	protein_coding	coding	63892146	64019072	2	-1	chromosome
ENSG00000170485	582.144	-0.249149	0.114598	-2.17363	0.0297327	0.365642	NPAS2	neuronal PAS domain protein 2 [Source:HGNC Symbol;Acc:HGNC:7895]	protein_coding	coding	100820152	100996829	2	1	chromosome
ENSG00000091409	2395.57	0.209767	0.0965763	2.17184	0.0298675	0.366977	ITGA6	integrin subunit alpha 6 [Source:HGNC Symbol;Acc:HGNC:6142]	protein_coding	coding	172427354	172506282	2	1	chromosome
ENSG00000105808	26.2135	0.193331	0.0932143	2.17084	0.0299432	0.367263	RASA4	RAS p21 protein activator 4 [Source:HGNC Symbol;Acc:HGNC:23181]	protein_coding	coding	102573807	102616757	7	-1	chromosome
ENSG00000117906	2114.88	0.1755	0.0808464	2.17097	0.0299338	0.367263	RCN2	reticulocalbin 2 [Source:HGNC Symbol;Acc:HGNC:9935]	protein_coding	coding	76931619	76954392	15	1	chromosome
ENSG00000102230	348.57	-0.261011	0.120467	-2.1646	0.0304184	0.369986	PCYT1B	phosphate cytidylyltransferase 1, choline, beta [Source:HGNC Symbol;Acc:HGNC:8755]	protein_coding	coding	24558087	24672677	X	-1	chromosome
ENSG00000127241	187.603	-0.288935	0.133844	-2.16367	0.0304898	0.369986	MASP1	mannan binding lectin serine peptidase 1 [Source:HGNC Symbol;Acc:HGNC:6901]	protein_coding	coding	187217285	187292022	3	-1	chromosome
ENSG00000128915	608.645	0.274714	0.127205	2.16394	0.030469	0.369986	ICE2	interactor of little elongation complex ELL subunit 2 [Source:HGNC Symbol;Acc:HGNC:29885]	protein_coding	coding	60419609	60479160	15	-1	chromosome
ENSG00000136758	2592.46	0.156678	0.0723617	2.16536	0.0303601	0.369986	YME1L1	YME1 like 1 ATPase [Source:HGNC Symbol;Acc:HGNC:12843]	protein_coding	coding	27110112	27155266	10	-1	chromosome
ENSG00000144895	1494.81	0.162298	0.0749901	2.16476	0.0304057	0.369986	EIF2A	eukaryotic translation initiation factor 2A [Source:HGNC Symbol;Acc:HGNC:3254]	protein_coding	coding	150546678	150584242	3	1	chromosome
ENSG00000154265	179.874	0.287512	0.133205	2.16594	0.0303159	0.369986	ABCA5	ATP binding cassette subfamily A member 5 [Source:HGNC Symbol;Acc:HGNC:35]	protein_coding	coding	69244311	69327244	17	-1	chromosome
ENSG00000167468	1918.53	-0.156186	0.0720655	-2.16692	0.0302406	0.369986	GPX4	glutathione peroxidase 4 [Source:HGNC Symbol;Acc:HGNC:4556]	protein_coding	coding	1103926	1106791	19	1	chromosome
ENSG00000167588	209.072	-0.276438	0.127651	-2.16433	0.0304387	0.369986	GPD1	glycerol-3-phosphate dehydrogenase 1 [Source:HGNC Symbol;Acc:HGNC:4455]	protein_coding	coding	50103819	50111319	12	1	chromosome
ENSG00000169641	748.698	0.213949	0.0989109	2.16462	0.030417	0.369986	LUZP1	leucine zipper protein 1 [Source:HGNC Symbol;Acc:HGNC:14985]	protein_coding	coding	23084023	23177808	1	-1	chromosome
ENSG00000196436	36.1616	0.271243	0.126499	2.16529	0.0303657	0.369986	NPIPB15	nuclear pore complex interacting protein family member B15 [Source:HGNC Symbol;Acc:HGNC:34409]	protein_coding	coding	74377878	74392080	16	1	chromosome
ENSG00000198843	945.992	-0.222888	0.102923	-2.1642	0.0304491	0.369986	SELENOT	selenoprotein T [Source:HGNC Symbol;Acc:HGNC:18136]	protein_coding	coding	150602875	150630445	3	1	chromosome
ENSG00000221914	538.843	0.250291	0.115773	2.16342	0.0305086	0.369986	PPP2R2A	protein phosphatase 2 regulatory subunit Balpha [Source:HGNC Symbol;Acc:HGNC:9304]	protein_coding	coding	26291491	26372680	8	1	chromosome
ENSG00000232342	11.2088	0.0840222	0.0507928	2.16709	0.0302283	0.369986	AC022540.1	NA	antisense_RNA	other	74506081	74530553	10	-1	chromosome
ENSG00000080298	124.201	0.271751	0.127449	2.15845	0.0308928	0.371737	RFX3	regulatory factor X3 [Source:HGNC Symbol;Acc:HGNC:9984]	protein_coding	coding	3218297	3526004	9	-1	chromosome
ENSG00000108528	411.82	-0.263121	0.121591	-2.15891	0.0308571	0.371737	SLC25A11	solute carrier family 25 member 11 [Source:HGNC Symbol;Acc:HGNC:10981]	protein_coding	coding	4937130	4940251	17	-1	chromosome
ENSG00000125779	881.645	0.195813	0.090665	2.16117	0.0306826	0.371737	PANK2	pantothenate kinase 2 [Source:HGNC Symbol;Acc:HGNC:15894]	protein_coding	coding	3888839	3929882	20	1	chromosome
ENSG00000134874	523.351	0.221004	0.102472	2.1571	0.030998	0.371737	DZIP1	DAZ interacting zinc finger protein 1 [Source:HGNC Symbol;Acc:HGNC:20908]	protein_coding	coding	95578202	95644703	13	-1	chromosome
ENSG00000135090	329.327	0.24377	0.113142	2.15737	0.0309767	0.371737	TAOK3	TAO kinase 3 [Source:HGNC Symbol;Acc:HGNC:18133]	protein_coding	coding	118149801	118372945	12	-1	chromosome
ENSG00000143416	320.903	-0.247076	0.114202	-2.16061	0.0307258	0.371737	SELENBP1	selenium binding protein 1 [Source:HGNC Symbol;Acc:HGNC:10719]	protein_coding	coding	151364302	151372733	1	-1	chromosome
ENSG00000165891	225.506	0.286144	0.132918	2.15759	0.0309599	0.371737	E2F7	E2F transcription factor 7 [Source:HGNC Symbol;Acc:HGNC:23820]	protein_coding	coding	77021247	77065580	12	-1	chromosome
ENSG00000168612	145.481	-0.286921	0.132764	-2.15716	0.0309936	0.371737	ZSWIM1	zinc finger SWIM-type containing 1 [Source:HGNC Symbol;Acc:HGNC:16155]	protein_coding	coding	45881227	45885266	20	1	chromosome
ENSG00000169905	535.666	-0.22913	0.106045	-2.15794	0.0309326	0.371737	TOR1AIP2	torsin 1A interacting protein 2 [Source:HGNC Symbol;Acc:HGNC:24055]	protein_coding	coding	179839967	179877803	1	-1	chromosome
ENSG00000171560	16245.9	0.110019	0.0509944	2.15746	0.0309697	0.371737	FGA	fibrinogen alpha chain [Source:HGNC Symbol;Acc:HGNC:3661]	protein_coding	coding	154583126	154590766	4	-1	chromosome
ENSG00000188229	4801.87	-0.121017	0.0560729	-2.15803	0.0309254	0.371737	TUBB4B	tubulin beta 4B class IVb [Source:HGNC Symbol;Acc:HGNC:20771]	protein_coding	coding	137241213	137243707	9	1	chromosome
ENSG00000196296	78.9553	-0.259129	0.122626	-2.15836	0.0308995	0.371737	ATP2A1	ATPase sarcoplasmic/endoplasmic reticulum Ca2+ transporting 1 [Source:HGNC Symbol;Acc:HGNC:811]	protein_coding	coding	28878405	28904509	16	1	chromosome
ENSG00000204323	11.9436	0.089533	0.0526615	2.15727	0.0309844	0.371737	SMIM5	small integral membrane protein 5 [Source:HGNC Symbol;Acc:HGNC:40030]	protein_coding	coding	75633434	75641404	17	1	chromosome
ENSG00000197417	346.928	-0.229731	0.106408	-2.15648	0.0310462	0.371997	SHPK	sedoheptulokinase [Source:HGNC Symbol;Acc:HGNC:1492]	protein_coding	coding	3608262	3636322	17	-1	chromosome
ENSG00000166851	1443.14	-0.156878	0.0727494	-2.15607	0.0310779	0.372058	PLK1	polo like kinase 1 [Source:HGNC Symbol;Acc:HGNC:9077]	protein_coding	coding	23677656	23690367	16	1	chromosome
ENSG00000172663	66.3586	-0.299956	0.139289	-2.15517	0.0311485	0.372585	TMEM134	transmembrane protein 134 [Source:HGNC Symbol;Acc:HGNC:26142]	protein_coding	coding	67461710	67469272	11	-1	chromosome
ENSG00000105258	271.71	-0.276769	0.128569	-2.15469	0.0311857	0.372712	POLR2I	RNA polymerase II subunit I [Source:HGNC Symbol;Acc:HGNC:9196]	protein_coding	coding	36113710	36115346	19	-1	chromosome
ENSG00000005302	136.9	0.299992	0.139433	2.15314	0.0313073	0.372736	MSL3	MSL complex subunit 3 [Source:HGNC Symbol;Acc:HGNC:7370]	protein_coding	coding	11758159	11775753	X	1	chromosome
ENSG00000095319	1466.7	-0.182455	0.0847097	-2.15345	0.0312831	0.372736	NUP188	nucleoporin 188 [Source:HGNC Symbol;Acc:HGNC:17859]	protein_coding	coding	128947699	129007096	9	1	chromosome
ENSG00000129235	624.396	-0.212884	0.0987253	-2.15397	0.0312426	0.372736	TXNDC17	thioredoxin domain containing 17 [Source:HGNC Symbol;Acc:HGNC:28218]	protein_coding	coding	6640758	6644541	17	1	chromosome
ENSG00000144161	251.073	0.284032	0.13171	2.15385	0.0312522	0.372736	ZC3H8	zinc finger CCCH-type containing 8 [Source:HGNC Symbol;Acc:HGNC:30941]	protein_coding	coding	112211525	112255136	2	-1	chromosome
ENSG00000159842	358.922	-0.245296	0.113972	-2.15297	0.0313208	0.372736	ABR	active BCR-related [Source:HGNC Symbol;Acc:HGNC:81]	protein_coding	coding	1003518	1229021	17	-1	chromosome
ENSG00000067141	286.971	-0.298164	0.138638	-2.15231	0.0313731	0.373042	NEO1	neogenin 1 [Source:HGNC Symbol;Acc:HGNC:7754]	protein_coding	coding	73051710	73305206	15	1	chromosome
ENSG00000025796	1678.25	-0.212364	0.0986517	-2.15182	0.0314117	0.373184	SEC63	SEC63 homolog, protein translocation regulator [Source:HGNC Symbol;Acc:HGNC:21082]	protein_coding	coding	107867756	107958189	6	-1	chromosome
ENSG00000168427	22.0393	0.0437706	0.0349267	2.15088	0.0314853	0.373742	KLHL30	kelch like family member 30 [Source:HGNC Symbol;Acc:HGNC:24770]	protein_coding	coding	238138722	238152947	2	1	chromosome
ENSG00000121621	230.004	-0.257428	0.119562	-2.1504	0.0315232	0.373874	KIF18A	kinesin family member 18A [Source:HGNC Symbol;Acc:HGNC:29441]	protein_coding	coding	28020620	28108308	11	-1	chromosome
ENSG00000187091	94.2009	0.299059	0.13893	2.14985	0.0315674	0.374081	PLCD1	phospholipase C delta 1 [Source:HGNC Symbol;Acc:HGNC:9060]	protein_coding	coding	38007496	38029762	3	-1	chromosome
ENSG00000120053	1052.9	-0.164422	0.0764852	-2.14894	0.0316393	0.374259	GOT1	glutamic-oxaloacetic transaminase 1 [Source:HGNC Symbol;Acc:HGNC:4432]	protein_coding	coding	99396870	99430624	10	-1	chromosome
ENSG00000168026	17.3016	0.168231	0.0844837	2.14865	0.0316625	0.374259	TTC21A	tetratricopeptide repeat domain 21A [Source:HGNC Symbol;Acc:HGNC:30761]	protein_coding	coding	39107704	39138903	3	1	chromosome
ENSG00000178445	2292.24	-0.128407	0.0597404	-2.1493	0.0316103	0.374259	GLDC	glycine decarboxylase [Source:HGNC Symbol;Acc:HGNC:4313]	protein_coding	coding	6532464	6645783	9	-1	chromosome
ENSG00000173540	320.567	-0.285321	0.132443	-2.14756	0.0317489	0.374964	GMPPB	GDP-mannose pyrophosphorylase B [Source:HGNC Symbol;Acc:HGNC:22932]	protein_coding	coding	49716844	49723951	3	-1	chromosome
ENSG00000106588	1648	0.161636	0.0752875	2.14709	0.0317861	0.375086	PSMA2	proteasome subunit alpha 2 [Source:HGNC Symbol;Acc:HGNC:9531]	protein_coding	coding	42916857	42932223	7	-1	chromosome
ENSG00000171988	1055.55	0.279033	0.130173	2.14672	0.0318153	0.375115	JMJD1C	jumonji domain containing 1C [Source:HGNC Symbol;Acc:HGNC:12313]	protein_coding	coding	63167221	63521850	10	-1	chromosome
ENSG00000140990	769.287	-0.205413	0.0956701	-2.14594	0.0318776	0.375534	NDUFB10	NADH:ubiquinone oxidoreductase subunit B10 [Source:HGNC Symbol;Acc:HGNC:7696]	protein_coding	coding	1959508	1961975	16	1	chromosome
ENSG00000071082	8676.14	-0.0949761	0.0442915	-2.14431	0.0320079	0.376343	RPL31	ribosomal protein L31 [Source:HGNC Symbol;Acc:HGNC:10334]	protein_coding	coding	101001715	101024032	2	1	chromosome
ENSG00000092010	2268.76	0.184274	0.0859439	2.14374	0.0320538	0.376343	PSME1	proteasome activator subunit 1 [Source:HGNC Symbol;Acc:HGNC:9568]	protein_coding	coding	24136158	24138967	14	1	chromosome
ENSG00000160766	19.3382	-0.1986	0.0957127	-2.14426	0.0320118	0.376343	GBAP1	glucosylceramidase beta pseudogene 1 [Source:HGNC Symbol;Acc:HGNC:4178]	transcribed_unprocessed_pseudogene	pseudo	155213821	155227422	1	-1	chromosome
ENSG00000179820	741.452	-0.202395	0.0943667	-2.1438	0.0320486	0.376343	MYADM	myeloid associated differentiation marker [Source:HGNC Symbol;Acc:HGNC:7544]	protein_coding	coding	53866223	53876437	19	1	chromosome
ENSG00000168758	457.957	-0.231086	0.107741	-2.1425	0.0321532	0.376563	SEMA4C	semaphorin 4C [Source:HGNC Symbol;Acc:HGNC:10731]	protein_coding	coding	96859716	96870757	2	-1	chromosome
ENSG00000197694	3812.21	-0.137027	0.0639434	-2.1427	0.0321372	0.376563	SPTAN1	spectrin alpha, non-erythrocytic 1 [Source:HGNC Symbol;Acc:HGNC:11273]	protein_coding	coding	128552558	128633662	9	1	chromosome
ENSG00000198865	109.99	0.297292	0.139245	2.14268	0.0321389	0.376563	CCDC152	coiled-coil domain containing 152 [Source:HGNC Symbol;Acc:HGNC:34438]	protein_coding	coding	42756801	42802360	5	1	chromosome
ENSG00000135097	20.7435	0.16828	0.0853223	2.14152	0.0322324	0.376861	MSI1	musashi RNA binding protein 1 [Source:HGNC Symbol;Acc:HGNC:7330]	protein_coding	coding	120341330	120369180	12	-1	chromosome
ENSG00000178425	844.164	-0.192602	0.0899304	-2.14161	0.0322252	0.376861	NT5DC1	5'-nucleotidase domain containing 1 [Source:HGNC Symbol;Acc:HGNC:21556]	protein_coding	coding	116100849	116249497	6	1	chromosome
ENSG00000110711	362.399	-0.226661	0.105766	-2.14102	0.0322724	0.377013	AIP	aryl hydrocarbon receptor interacting protein [Source:HGNC Symbol;Acc:HGNC:358]	protein_coding	coding	67483041	67491103	11	1	chromosome
ENSG00000079313	244.599	0.296356	0.139293	2.14065	0.0323026	0.377052	REXO1	RNA exonuclease 1 homolog [Source:HGNC Symbol;Acc:HGNC:24616]	protein_coding	coding	1815246	1848463	19	-1	chromosome
ENSG00000122359	673.356	-0.237798	0.111156	-2.13936	0.0324061	0.377665	ANXA11	annexin A11 [Source:HGNC Symbol;Acc:HGNC:535]	protein_coding	coding	80150889	80205572	10	-1	chromosome
ENSG00000169299	611.368	0.221374	0.103598	2.13933	0.032409	0.377665	PGM2	phosphoglucomutase 2 [Source:HGNC Symbol;Acc:HGNC:8906]	protein_coding	coding	37826633	37862937	4	1	chromosome
ENSG00000176912	200.146	0.275909	0.12914	2.13824	0.0324977	0.378383	TYMSOS	TYMS opposite strand [Source:HGNC Symbol;Acc:HGNC:29553]	bidirectional_promoter_lncRNA	other	641320	658340	18	-1	chromosome
ENSG00000077942	1338.63	-0.17405	0.0814167	-2.13756	0.0325528	0.378446	FBLN1	fibulin 1 [Source:HGNC Symbol;Acc:HGNC:3600]	protein_coding	coding	45502238	45601135	22	1	chromosome
ENSG00000100504	1441.16	0.175661	0.0822396	2.13684	0.0326111	0.378446	PYGL	glycogen phosphorylase L [Source:HGNC Symbol;Acc:HGNC:9725]	protein_coding	coding	50857891	50944736	14	-1	chromosome
ENSG00000105821	907.933	0.260016	0.121818	2.13738	0.0325674	0.378446	DNAJC2	DnaJ heat shock protein family (Hsp40) member C2 [Source:HGNC Symbol;Acc:HGNC:13192]	protein_coding	coding	103312474	103344873	7	-1	chromosome
ENSG00000135929	1684.24	-0.212724	0.0994941	-2.13707	0.0325925	0.378446	CYP27A1	cytochrome P450 family 27 subfamily A member 1 [Source:HGNC Symbol;Acc:HGNC:2605]	protein_coding	coding	218781749	218815293	2	1	chromosome
ENSG00000083845	5550.46	-0.159338	0.0745824	-2.13609	0.0326718	0.378836	RPS5	ribosomal protein S5 [Source:HGNC Symbol;Acc:HGNC:10426]	protein_coding	coding	58386400	58394806	19	1	chromosome
ENSG00000109390	631.721	0.201178	0.094275	2.13415	0.0328305	0.380047	NDUFC1	NADH:ubiquinone oxidoreductase subunit C1 [Source:HGNC Symbol;Acc:HGNC:7705]	protein_coding	coding	139266880	139302551	4	-1	chromosome
ENSG00000145782	604.11	0.221529	0.103853	2.13421	0.0328259	0.380047	ATG12	autophagy related 12 [Source:HGNC Symbol;Acc:HGNC:588]	protein_coding	coding	115828200	115841858	5	-1	chromosome
ENSG00000023041	650.749	0.207167	0.0971699	2.13331	0.0328995	0.380086	ZDHHC6	zinc finger DHHC-type containing 6 [Source:HGNC Symbol;Acc:HGNC:19160]	protein_coding	coding	112424428	112446917	10	-1	chromosome
ENSG00000133318	1060.45	0.209615	0.0982378	2.13343	0.0328894	0.380086	RTN3	reticulon 3 [Source:HGNC Symbol;Acc:HGNC:10469]	protein_coding	coding	63681446	63759891	11	1	chromosome
ENSG00000197451	2330.62	0.128587	0.0602829	2.13312	0.0329153	0.380086	HNRNPAB	heterogeneous nuclear ribonucleoprotein A/B [Source:HGNC Symbol;Acc:HGNC:5034]	protein_coding	coding	178204507	178211163	5	1	chromosome
ENSG00000164211	1151.79	0.206821	0.0970464	2.13206	0.0330019	0.380772	STARD4	StAR related lipid transfer domain containing 4 [Source:HGNC Symbol;Acc:HGNC:18058]	protein_coding	coding	111496033	111512590	5	-1	chromosome
ENSG00000229619	14.2981	0.116539	0.0640456	2.1297	0.033196	0.382506	MBNL1-AS1	MBNL1 antisense RNA 1 [Source:HGNC Symbol;Acc:HGNC:44584]	antisense_RNA	other	152262616	152269555	3	-1	chromosome
ENSG00000264569	17.8407	0.152952	0.079123	2.12957	0.0332068	0.382506	AC137723.1	NA	antisense_RNA	other	82037905	82039380	17	1	chromosome
ENSG00000161904	443.009	0.215553	0.101413	2.12735	0.0333913	0.384226	LEMD2	LEM domain containing 2 [Source:HGNC Symbol;Acc:HGNC:21244]	protein_coding	coding	33771202	33789136	6	-1	chromosome
ENSG00000185608	405.399	0.238209	0.111926	2.12711	0.0334109	0.384226	MRPL40	mitochondrial ribosomal protein L40 [Source:HGNC Symbol;Acc:HGNC:14491]	protein_coding	coding	19431902	19436075	22	1	chromosome
ENSG00000004864	1177.18	0.181915	0.0855601	2.12611	0.0334939	0.384234	SLC25A13	solute carrier family 25 member 13 [Source:HGNC Symbol;Acc:HGNC:10983]	protein_coding	coding	96120220	96322147	7	-1	chromosome
ENSG00000015479	5967.33	0.119437	0.0561771	2.12617	0.0334891	0.384234	MATR3	matrin 3 [Source:HGNC Symbol;Acc:HGNC:6912]	protein_coding	coding	139293648	139331677	5	1	chromosome
ENSG00000031823	668.072	0.227673	0.107074	2.12653	0.0334589	0.384234	RANBP3	RAN binding protein 3 [Source:HGNC Symbol;Acc:HGNC:9850]	protein_coding	coding	5916139	5978142	19	-1	chromosome
ENSG00000138646	12.1995	0.173658	0.0849599	2.12486	0.0335983	0.384519	HERC5	HECT and RLD domain containing E3 ubiquitin protein ligase 5 [Source:HGNC Symbol;Acc:HGNC:24368]	protein_coding	coding	88457117	88506163	4	1	chromosome
ENSG00000198933	90.9297	-0.296139	0.139432	-2.12494	0.0335917	0.384519	TBKBP1	TBK1 binding protein 1 [Source:HGNC Symbol;Acc:HGNC:30140]	protein_coding	coding	47694081	47712050	17	1	chromosome
ENSG00000258388	62.817	-0.251041	0.120362	-2.12483	0.0336011	0.384519	PPT2-EGFL8	PPT2-EGFL8 readthrough (NMD candidate) [Source:HGNC Symbol;Acc:HGNC:48343]	protein_coding	coding	32153845	32171978	6	1	chromosome
ENSG00000105220	2506.89	-0.1762	0.0829501	-2.12357	0.0337064	0.385409	GPI	glucose-6-phosphate isomerase [Source:HGNC Symbol;Acc:HGNC:4458]	protein_coding	coding	34359480	34402156	19	1	chromosome
ENSG00000138439	303.23	0.246901	0.116391	2.1232	0.0337369	0.385443	FAM117B	family with sequence similarity 117 member B [Source:HGNC Symbol;Acc:HGNC:14440]	protein_coding	coding	202635188	202769757	2	1	chromosome
ENSG00000083520	838.645	0.174523	0.0823075	2.12083	0.0339365	0.386776	DIS3	DIS3 homolog, exosome endoribonuclease and 3'-5' exoribonuclease [Source:HGNC Symbol;Acc:HGNC:20604]	protein_coding	coding	72752169	72782096	13	-1	chromosome
ENSG00000101577	1381.79	0.157766	0.074378	2.12113	0.0339105	0.386776	LPIN2	lipin 2 [Source:HGNC Symbol;Acc:HGNC:14450]	protein_coding	coding	2916994	3013315	18	-1	chromosome
ENSG00000146425	584.419	-0.221929	0.10448	-2.12136	0.0338917	0.386776	DYNLT1	dynein light chain Tctex-type 1 [Source:HGNC Symbol;Acc:HGNC:11697]	protein_coding	coding	158636474	158644739	6	-1	chromosome
ENSG00000132716	1039.72	-0.262753	0.123769	-2.12	0.0340065	0.387259	DCAF8	DDB1 and CUL4 associated factor 8 [Source:HGNC Symbol;Acc:HGNC:24891]	protein_coding	coding	160215715	160262531	1	-1	chromosome
ENSG00000070950	349.987	0.278084	0.131762	2.11578	0.0343634	0.39016	RAD18	RAD18, E3 ubiquitin protein ligase [Source:HGNC Symbol;Acc:HGNC:18278]	protein_coding	coding	8775402	8963773	3	-1	chromosome
ENSG00000087502	580.566	0.222908	0.105398	2.11567	0.0343726	0.39016	ERGIC2	ERGIC and golgi 2 [Source:HGNC Symbol;Acc:HGNC:30208]	protein_coding	coding	29337352	29381189	12	-1	chromosome
ENSG00000108064	1666.41	0.143862	0.0679977	2.11587	0.0343557	0.39016	TFAM	transcription factor A, mitochondrial [Source:HGNC Symbol;Acc:HGNC:11741]	protein_coding	coding	58385022	58399221	10	1	chromosome
ENSG00000121274	699.668	0.191017	0.0902657	2.11609	0.0343369	0.39016	PAPD5	poly(A) RNA polymerase D5, non-canonical [Source:HGNC Symbol;Acc:HGNC:30758]	protein_coding	coding	50152918	50235310	16	1	chromosome
ENSG00000129003	968.392	0.250443	0.118602	2.114	0.0345149	0.391152	VPS13C	vacuolar protein sorting 13 homolog C [Source:HGNC Symbol;Acc:HGNC:23594]	protein_coding	coding	61852389	62060473	15	-1	chromosome
ENSG00000143549	4212.22	-0.130595	0.0617725	-2.11399	0.0345159	0.391152	TPM3	tropomyosin 3 [Source:HGNC Symbol;Acc:HGNC:12012]	protein_coding	coding	154155304	154194648	1	-1	chromosome
ENSG00000110108	228.518	0.271322	0.128699	2.11306	0.0345956	0.391738	TMEM109	transmembrane protein 109 [Source:HGNC Symbol;Acc:HGNC:28771]	protein_coding	coding	60913874	60923443	11	1	chromosome
ENSG00000162804	28.8221	0.168781	0.0845727	2.11227	0.0346636	0.392191	SNED1	sushi, nidogen and EGF like domains 1 [Source:HGNC Symbol;Acc:HGNC:24696]	protein_coding	coding	240998838	241095568	2	1	chromosome
ENSG00000078246	226.387	-0.266206	0.126007	-2.1118	0.0347039	0.39224	TULP3	tubby like protein 3 [Source:HGNC Symbol;Acc:HGNC:12425]	protein_coding	coding	2877223	2941140	12	1	chromosome
ENSG00000112851	893.162	0.216573	0.1026	2.11156	0.0347239	0.39224	ERBIN	erbb2 interacting protein [Source:HGNC Symbol;Acc:HGNC:15842]	protein_coding	coding	65926475	66082549	5	1	chromosome
ENSG00000109180	869.754	0.178425	0.0845337	2.11062	0.0348052	0.392817	OCIAD1	OCIA domain containing 1 [Source:HGNC Symbol;Acc:HGNC:16074]	protein_coding	coding	48805212	48861817	4	1	chromosome
ENSG00000166710	4719.57	0.117772	0.0558108	2.11032	0.034831	0.392817	B2M	beta-2-microglobulin [Source:HGNC Symbol;Acc:HGNC:914]	protein_coding	coding	44711477	44718877	15	1	chromosome
ENSG00000164125	1960.18	0.245472	0.116458	2.10914	0.0349322	0.393324	FAM198B	family with sequence similarity 198 member B [Source:HGNC Symbol;Acc:HGNC:25312]	protein_coding	coding	158124474	158173318	4	-1	chromosome
ENSG00000188846	7803.26	0.129479	0.0613849	2.10924	0.0349235	0.393324	RPL14	ribosomal protein L14 [Source:HGNC Symbol;Acc:HGNC:10305]	protein_coding	coding	40457292	40468587	3	1	chromosome
ENSG00000119912	908.367	-0.229296	0.108723	-2.10874	0.0349671	0.393401	IDE	insulin degrading enzyme [Source:HGNC Symbol;Acc:HGNC:5381]	protein_coding	coding	92451684	92574076	10	-1	chromosome
ENSG00000103549	1382.48	0.224124	0.106397	2.10811	0.0350215	0.393697	RNF40	ring finger protein 40 [Source:HGNC Symbol;Acc:HGNC:16867]	protein_coding	coding	30761745	30776307	16	1	chromosome
ENSG00000150967	87.9648	0.293145	0.139031	2.10723	0.0350978	0.394238	ABCB9	ATP binding cassette subfamily B member 9 [Source:HGNC Symbol;Acc:HGNC:50]	protein_coding	coding	122920951	122981649	12	-1	chromosome
ENSG00000185559	2833.77	-0.191199	0.090733	-2.10667	0.0351458	0.394461	DLK1	delta like non-canonical Notch ligand 1 [Source:HGNC Symbol;Acc:HGNC:2907]	protein_coding	coding	100725705	100738224	14	1	chromosome
ENSG00000110025	323.852	0.268024	0.127541	2.10627	0.0351809	0.394539	SNX15	sorting nexin 15 [Source:HGNC Symbol;Acc:HGNC:14978]	protein_coding	coding	65027408	65040572	11	1	chromosome
ENSG00000198727	24525.2	-0.109752	0.0521214	-2.10565	0.0352347	0.394826	MT-CYB	mitochondrially encoded cytochrome b [Source:HGNC Symbol;Acc:HGNC:7427]	protein_coding	mito	14747	15887	MT	1	chromosome
ENSG00000197852	154.016	-0.282711	0.134073	-2.10343	0.0354283	0.396452	FAM212B	family with sequence similarity 212 member B [Source:HGNC Symbol;Acc:HGNC:28045]	protein_coding	coding	111680630	111755824	1	-1	chromosome
ENSG00000250317	212.977	0.271849	0.129312	2.10334	0.0354364	0.396452	SMIM20	small integral membrane protein 20 [Source:HGNC Symbol;Acc:HGNC:37260]	protein_coding	coding	25861830	25929874	4	1	chromosome
ENSG00000128731	827.277	0.276973	0.131748	2.10274	0.0354887	0.39672	HERC2	HECT and RLD domain containing E3 ubiquitin protein ligase 2 [Source:HGNC Symbol;Acc:HGNC:4868]	protein_coding	coding	28111040	28322152	15	-1	chromosome
ENSG00000185885	11.3776	-0.108336	0.0604854	-2.10207	0.0355471	0.397056	IFITM1	interferon induced transmembrane protein 1 [Source:HGNC Symbol;Acc:HGNC:5412]	protein_coding	coding	313506	315272	11	1	chromosome
ENSG00000147050	405.823	0.2329	0.110995	2.10142	0.0356043	0.397062	KDM6A	lysine demethylase 6A [Source:HGNC Symbol;Acc:HGNC:12637]	protein_coding	coding	44873177	45112602	X	1	chromosome
ENSG00000164054	975.988	-0.165505	0.0787339	-2.10147	0.0356	0.397062	SHISA5	shisa family member 5 [Source:HGNC Symbol;Acc:HGNC:30376]	protein_coding	coding	48467798	48504826	3	-1	chromosome
ENSG00000135744	9563.57	-0.135905	0.0647173	-2.09983	0.0357434	0.398296	AGT	angiotensinogen [Source:HGNC Symbol;Acc:HGNC:333]	protein_coding	coding	230702523	230714297	1	-1	chromosome
ENSG00000119655	1259.66	-0.17721	0.0843911	-2.09911	0.0358076	0.398377	NPC2	NPC intracellular cholesterol transporter 2 [Source:HGNC Symbol;Acc:HGNC:14537]	protein_coding	coding	74476192	74494177	14	-1	chromosome
ENSG00000158286	162.606	0.288898	0.138225	2.09916	0.0358031	0.398377	RNF207	ring finger protein 207 [Source:HGNC Symbol;Acc:HGNC:32947]	protein_coding	coding	6205475	6221299	1	1	chromosome
ENSG00000152620	596.33	0.201338	0.0960222	2.09847	0.0358639	0.398687	NADK2	NAD kinase 2, mitochondrial [Source:HGNC Symbol;Acc:HGNC:26404]	protein_coding	coding	36192592	36242279	5	-1	chromosome
ENSG00000117569	188.869	0.264586	0.12636	2.09791	0.0359129	0.398915	PTBP2	polypyrimidine tract binding protein 2 [Source:HGNC Symbol;Acc:HGNC:17662]	protein_coding	coding	96721665	96823738	1	1	chromosome
ENSG00000177463	539.167	-0.234951	0.111944	-2.09747	0.0359523	0.399036	NR2C2	nuclear receptor subfamily 2 group C member 2 [Source:HGNC Symbol;Acc:HGNC:7972]	protein_coding	coding	14947584	15053600	3	1	chromosome
ENSG00000092531	1411.75	-0.14113	0.0673369	-2.09563	0.0361146	0.399915	SNAP23	synaptosome associated protein 23 [Source:HGNC Symbol;Acc:HGNC:11131]	protein_coding	coding	42491233	42545356	15	1	chromosome
ENSG00000125734	297.747	0.288817	0.137978	2.09479	0.0361893	0.399915	GPR108	G protein-coupled receptor 108 [Source:HGNC Symbol;Acc:HGNC:17829]	protein_coding	coding	6729914	6737603	19	-1	chromosome
ENSG00000130244	99.209	0.290175	0.139435	2.09361	0.036295	0.399915	FAM98C	family with sequence similarity 98 member C [Source:HGNC Symbol;Acc:HGNC:27119]	protein_coding	coding	38403135	38409088	19	1	chromosome
ENSG00000149269	30.3525	0.200842	0.100442	2.0912	0.0365104	0.399915	PAK1	p21 (RAC1) activated kinase 1 [Source:HGNC Symbol;Acc:HGNC:8590]	protein_coding	coding	77321707	77474635	11	-1	chromosome
ENSG00000157637	1164.6	-0.182305	0.0870665	-2.09289	0.0363594	0.399915	SLC38A10	solute carrier family 38 member 10 [Source:HGNC Symbol;Acc:HGNC:28237]	protein_coding	coding	81245000	81295547	17	-1	chromosome
ENSG00000160213	701.587	-0.224143	0.106879	-2.09554	0.036123	0.399915	CSTB	cystatin B [Source:HGNC Symbol;Acc:HGNC:2482]	protein_coding	coding	43772511	43776445	21	-1	chromosome
ENSG00000160932	369.771	-0.232859	0.111144	-2.09194	0.0364439	0.399915	LY6E	lymphocyte antigen 6 family member E [Source:HGNC Symbol;Acc:HGNC:6727]	protein_coding	coding	143017982	143023832	8	1	chromosome
ENSG00000163041	3264.12	0.140607	0.0671711	2.09316	0.0363352	0.399915	H3F3A	H3 histone family member 3A [Source:HGNC Symbol;Acc:HGNC:4764]	protein_coding	coding	226061851	226072001	1	1	chromosome
ENSG00000163961	286.489	-0.240273	0.114879	-2.09113	0.0365168	0.399915	RNF168	ring finger protein 168 [Source:HGNC Symbol;Acc:HGNC:26661]	protein_coding	coding	196468783	196503768	3	-1	chromosome
ENSG00000164144	328.524	0.255306	0.122304	2.09237	0.0364053	0.399915	ARFIP1	ADP ribosylation factor interacting protein 1 [Source:HGNC Symbol;Acc:HGNC:21496]	protein_coding	coding	152779937	152918463	4	1	chromosome
ENSG00000169410	382.482	0.235085	0.112488	2.09284	0.0363634	0.399915	PTPN9	protein tyrosine phosphatase, non-receptor type 9 [Source:HGNC Symbol;Acc:HGNC:9661]	protein_coding	coding	75463251	75579289	15	-1	chromosome
ENSG00000172354	614.812	-0.222857	0.106341	-2.09424	0.0362382	0.399915	GNB2	G protein subunit beta 2 [Source:HGNC Symbol;Acc:HGNC:4398]	protein_coding	coding	100673531	100679174	7	1	chromosome
ENSG00000182899	4748.44	0.130864	0.0625293	2.09277	0.0363696	0.399915	RPL35A	ribosomal protein L35a [Source:HGNC Symbol;Acc:HGNC:10345]	protein_coding	coding	197949987	197956610	3	1	chromosome
ENSG00000185453	72.0017	-0.277967	0.132161	-2.09122	0.0365081	0.399915	C19orf68	chromosome 19 open reading frame 68 [Source:HGNC Symbol;Acc:HGNC:34495]	protein_coding	coding	48170692	48197620	19	1	chromosome
ENSG00000204370	1050.13	0.172086	0.082302	2.09159	0.0364751	0.399915	SDHD	succinate dehydrogenase complex subunit D [Source:HGNC Symbol;Acc:HGNC:10683]	protein_coding	coding	112086773	112120013	11	1	chromosome
ENSG00000228474	1686.17	-0.18771	0.0895136	-2.09598	0.0360839	0.399915	OST4	oligosaccharyltransferase complex subunit 4, non-catalytic [Source:HGNC Symbol;Acc:HGNC:32483]	protein_coding	coding	27070472	27071773	2	-1	chromosome
ENSG00000261296	11.521	0.151612	0.0771203	2.09257	0.0363873	0.399915	AC126323.6	NA	lincRNA	noncoding	62274163	62278365	15	1	chromosome
ENSG00000105854	3056.01	0.115768	0.0553825	2.09044	0.0365779	0.40027	PON2	paraoxonase 2 [Source:HGNC Symbol;Acc:HGNC:9205]	protein_coding	coding	95404863	95435329	7	-1	chromosome
ENSG00000100320	859.8	0.22938	0.10977	2.0897	0.0366451	0.400694	RBFOX2	RNA binding protein, fox-1 homolog 2 [Source:HGNC Symbol;Acc:HGNC:9906]	protein_coding	coding	35738736	36028425	22	-1	chromosome
ENSG00000055044	2307.99	0.134426	0.064419	2.08682	0.0369043	0.401335	NOP58	NOP58 ribonucleoprotein [Source:HGNC Symbol;Acc:HGNC:29926]	protein_coding	coding	202265716	202303666	2	1	chromosome
ENSG00000064012	629.051	0.286443	0.137527	2.08823	0.0367767	0.401335	CASP8	caspase 8 [Source:HGNC Symbol;Acc:HGNC:1509]	protein_coding	coding	201233443	201287711	2	1	chromosome
ENSG00000109171	403.617	-0.250793	0.119869	-2.08792	0.0368052	0.401335	SLAIN2	SLAIN motif family member 2 [Source:HGNC Symbol;Acc:HGNC:29282]	protein_coding	coding	48341322	48426212	4	1	chromosome
ENSG00000120253	882.462	-0.212417	0.101796	-2.08751	0.0368425	0.401335	NUP43	nucleoporin 43 [Source:HGNC Symbol;Acc:HGNC:21182]	protein_coding	coding	149724315	149749665	6	-1	chromosome
ENSG00000121680	105.087	-0.292454	0.139397	-2.08709	0.0368799	0.401335	PEX16	peroxisomal biogenesis factor 16 [Source:HGNC Symbol;Acc:HGNC:8857]	protein_coding	coding	45909669	45918812	11	-1	chromosome
ENSG00000152457	102.276	-0.285386	0.137071	-2.08713	0.0368762	0.401335	DCLRE1C	DNA cross-link repair 1C [Source:HGNC Symbol;Acc:HGNC:17642]	protein_coding	coding	14897359	14954432	10	-1	chromosome
ENSG00000154310	13.0945	-0.198515	0.0991446	-2.08802	0.036796	0.401335	TNIK	TRAF2 and NCK interacting kinase [Source:HGNC Symbol;Acc:HGNC:30765]	protein_coding	coding	171061339	171460408	3	-1	chromosome
ENSG00000164828	937.786	-0.165895	0.0796077	-2.08354	0.037202	0.403311	SUN1	Sad1 and UNC84 domain containing 1 [Source:HGNC Symbol;Acc:HGNC:18587]	protein_coding	coding	816615	896435	7	1	chromosome
ENSG00000166250	10.6526	0.107442	0.0605865	2.08371	0.0371862	0.403311	CLMP	CXADR like membrane protein [Source:HGNC Symbol;Acc:HGNC:24039]	protein_coding	coding	123069865	123195281	11	-1	chromosome
ENSG00000167904	247.495	0.248034	0.119183	2.08322	0.0372309	0.403311	TMEM68	transmembrane protein 68 [Source:HGNC Symbol;Acc:HGNC:26510]	protein_coding	coding	55696424	55773407	8	-1	chromosome
ENSG00000189042	64.3327	-0.282233	0.135152	-2.08229	0.0373164	0.403311	ZNF567	zinc finger protein 567 [Source:HGNC Symbol;Acc:HGNC:28696]	protein_coding	coding	36687612	36727701	19	1	chromosome
ENSG00000204388	1724.54	-0.213941	0.102647	-2.08291	0.0372598	0.403311	HSPA1B	heat shock protein family A (Hsp70) member 1B [Source:HGNC Symbol;Acc:HGNC:5233]	protein_coding	coding	31827735	31830255	6	1	chromosome
ENSG00000214022	1404.75	-0.14633	0.0702593	-2.08246	0.0373002	0.403311	REPIN1	replication initiator 1 [Source:HGNC Symbol;Acc:HGNC:17922]	protein_coding	coding	150368189	150374044	7	1	chromosome
ENSG00000214253	390.354	-0.247768	0.118625	-2.08402	0.0371587	0.403311	FIS1	fission, mitochondrial 1 [Source:HGNC Symbol;Acc:HGNC:21689]	protein_coding	coding	101239458	101252316	7	-1	chromosome
ENSG00000269556	111.22	0.290428	0.139385	2.08232	0.0373135	0.403311	TMEM185A	transmembrane protein 185A [Source:HGNC Symbol;Acc:HGNC:17125]	protein_coding	coding	149596556	149631912	X	-1	chromosome
ENSG00000101162	46.4475	-0.279476	0.133609	-2.08166	0.0373734	0.40335	TUBB1	tubulin beta 1 class VI [Source:HGNC Symbol;Acc:HGNC:16257]	protein_coding	coding	59019254	59026654	20	1	chromosome
ENSG00000247903	147.215	0.274949	0.131973	2.08162	0.0373776	0.40335	AC024896.1	NA	antisense_RNA	other	26971586	26979582	12	1	chromosome
ENSG00000182872	653.042	-0.195491	0.093885	-2.08066	0.0374649	0.40398	RBM10	RNA binding motif protein 10 [Source:HGNC Symbol;Acc:HGNC:9896]	protein_coding	coding	47144869	47186813	X	1	chromosome
ENSG00000086598	3947.94	0.14151	0.068035	2.08026	0.0375013	0.404062	TMED2	transmembrane p24 trafficking protein 2 [Source:HGNC Symbol;Acc:HGNC:16996]	protein_coding	coding	123584531	123598577	12	1	chromosome
ENSG00000035681	451.697	0.287949	0.139197	2.0771	0.0377927	0.405021	NSMAF	neutral sphingomyelinase activation associated factor [Source:HGNC Symbol;Acc:HGNC:8017]	protein_coding	coding	58583504	58659844	8	-1	chromosome
ENSG00000104695	923.046	-0.164618	0.0792255	-2.07728	0.0377762	0.405021	PPP2CB	protein phosphatase 2 catalytic subunit beta [Source:HGNC Symbol;Acc:HGNC:9300]	protein_coding	coding	30774457	30814314	8	-1	chromosome
ENSG00000120158	362.753	0.241486	0.116298	2.07801	0.0377082	0.405021	RCL1	RNA terminal phosphate cyclase like 1 [Source:HGNC Symbol;Acc:HGNC:17687]	protein_coding	coding	4792869	4885917	9	1	chromosome
ENSG00000129514	1115.57	0.158046	0.0760537	2.07867	0.0376474	0.405021	FOXA1	forkhead box A1 [Source:HGNC Symbol;Acc:HGNC:5021]	protein_coding	coding	37589984	37596059	14	-1	chromosome
ENSG00000154099	27.5969	0.109829	0.0628762	2.07789	0.0377197	0.405021	DNAAF1	dynein axonemal assembly factor 1 [Source:HGNC Symbol;Acc:HGNC:30539]	protein_coding	coding	84145287	84178767	16	1	chromosome
ENSG00000175866	298.823	0.279947	0.135186	2.07739	0.0377659	0.405021	BAIAP2	BAI1 associated protein 2 [Source:HGNC Symbol;Acc:HGNC:947]	protein_coding	coding	81035122	81117432	17	1	chromosome
ENSG00000197429	126.064	0.28037	0.13514	2.07779	0.0377288	0.405021	IPP	intracisternal A particle-promoted polypeptide [Source:HGNC Symbol;Acc:HGNC:6108]	protein_coding	coding	45694324	45750650	1	-1	chromosome
ENSG00000063761	70.1683	0.289285	0.139419	2.07595	0.0378985	0.405225	ADCK1	aarF domain containing kinase 1 [Source:HGNC Symbol;Acc:HGNC:19038]	protein_coding	coding	77800083	77935012	14	1	chromosome
ENSG00000132522	462.6	-0.210255	0.101184	-2.07604	0.0378904	0.405225	GPS2	G protein pathway suppressor 2 [Source:HGNC Symbol;Acc:HGNC:4550]	protein_coding	coding	7311324	7315564	17	-1	chromosome
ENSG00000171720	656.346	0.186565	0.0898547	2.07633	0.0378635	0.405225	HDAC3	histone deacetylase 3 [Source:HGNC Symbol;Acc:HGNC:4854]	protein_coding	coding	141620876	141636870	5	-1	chromosome
ENSG00000106348	333.695	-0.271342	0.131054	-2.07346	0.0381294	0.407072	IMPDH1	inosine monophosphate dehydrogenase 1 [Source:HGNC Symbol;Acc:HGNC:6052]	protein_coding	coding	128392277	128410252	7	-1	chromosome
ENSG00000112308	1727.19	0.146374	0.0705935	2.07364	0.0381125	0.407072	C6orf62	chromosome 6 open reading frame 62 [Source:HGNC Symbol;Acc:HGNC:20998]	protein_coding	coding	24704861	24720836	6	-1	chromosome
ENSG00000136891	545.958	0.210732	0.101741	2.073	0.0381727	0.407224	TEX10	testis expressed 10 [Source:HGNC Symbol;Acc:HGNC:25988]	protein_coding	coding	100302077	100352939	9	-1	chromosome
ENSG00000142444	140.283	0.279225	0.134671	2.07254	0.0382155	0.407371	TIMM29	translocase of inner mitochondrial membrane 29 [Source:HGNC Symbol;Acc:HGNC:25152]	protein_coding	coding	10928733	10933535	19	1	chromosome
ENSG00000074621	172.833	-0.285929	0.13811	-2.07213	0.0382536	0.407466	SLC24A1	solute carrier family 24 member 1 [Source:HGNC Symbol;Acc:HGNC:10975]	protein_coding	coding	65611366	65660995	15	1	chromosome
ENSG00000147601	362.46	0.242804	0.117408	2.0716	0.0383023	0.407675	TERF1	telomeric repeat binding factor 1 [Source:HGNC Symbol;Acc:HGNC:11728]	protein_coding	coding	73008864	73048122	8	1	chromosome
ENSG00000010292	2029.52	-0.184961	0.0893025	-2.07052	0.0384033	0.40782	NCAPD2	non-SMC condensin I complex subunit D2 [Source:HGNC Symbol;Acc:HGNC:24305]	protein_coding	coding	6493356	6531955	12	1	chromosome
ENSG00000117425	30.2625	0.248756	0.12223	2.07055	0.0384006	0.40782	PTCH2	patched 2 [Source:HGNC Symbol;Acc:HGNC:9586]	protein_coding	coding	44819844	44843063	1	-1	chromosome
ENSG00000155508	650.687	0.24237	0.117164	2.07111	0.0383485	0.40782	CNOT8	CCR4-NOT transcription complex subunit 8 [Source:HGNC Symbol;Acc:HGNC:9207]	protein_coding	coding	154857553	154876793	5	1	chromosome
ENSG00000130921	211.089	0.275833	0.133202	2.06925	0.0385229	0.40878	C12orf65	chromosome 12 open reading frame 65 [Source:HGNC Symbol;Acc:HGNC:26784]	protein_coding	coding	123232916	123257959	12	1	chromosome
ENSG00000087152	840.975	-0.191235	0.092415	-2.06842	0.0386009	0.409139	ATXN7L3	ataxin 7 like 3 [Source:HGNC Symbol;Acc:HGNC:25416]	protein_coding	coding	44191805	44200113	17	-1	chromosome
ENSG00000118162	110.678	0.28685	0.139145	2.06795	0.0386443	0.409139	KPTN	kaptin, actin binding protein [Source:HGNC Symbol;Acc:HGNC:6404]	protein_coding	coding	47475144	47484268	19	-1	chromosome
ENSG00000198130	669.505	0.18095	0.087536	2.06798	0.0386418	0.409139	HIBCH	3-hydroxyisobutyryl-CoA hydrolase [Source:HGNC Symbol;Acc:HGNC:4908]	protein_coding	coding	190189735	190344193	2	-1	chromosome
ENSG00000111674	557.023	-0.219191	0.105945	-2.06681	0.0387521	0.409971	ENO2	enolase 2 [Source:HGNC Symbol;Acc:HGNC:3353]	protein_coding	coding	6913745	6923698	12	1	chromosome
ENSG00000005007	1204.42	-0.192871	0.0933041	-2.06617	0.0388122	0.41007	UPF1	UPF1, RNA helicase and ATPase [Source:HGNC Symbol;Acc:HGNC:9962]	protein_coding	coding	18831938	18868236	19	1	chromosome
ENSG00000160183	19.71	-0.197262	0.0985675	-2.06599	0.0388292	0.41007	TMPRSS3	transmembrane protease, serine 3 [Source:HGNC Symbol;Acc:HGNC:11877]	protein_coding	coding	42371890	42396846	21	-1	chromosome
ENSG00000182934	1445.18	-0.151721	0.0734392	-2.06578	0.0388493	0.41007	SRPRA	SRP receptor alpha subunit [Source:HGNC Symbol;Acc:HGNC:11307]	protein_coding	coding	126262919	126269144	11	-1	chromosome
ENSG00000143476	686.424	0.262775	0.127484	2.06474	0.0389473	0.410485	DTL	denticleless E3 ubiquitin protein ligase homolog [Source:HGNC Symbol;Acc:HGNC:30288]	protein_coding	coding	212035553	212107400	1	1	chromosome
ENSG00000147689	24.4484	0.108451	0.0625329	2.06482	0.0389396	0.410485	FAM83A	family with sequence similarity 83 member A [Source:HGNC Symbol;Acc:HGNC:28210]	protein_coding	coding	123178960	123210079	8	1	chromosome
ENSG00000177556	397.409	-0.231369	0.111999	-2.06334	0.0390801	0.411576	ATOX1	antioxidant 1 copper chaperone [Source:HGNC Symbol;Acc:HGNC:798]	protein_coding	coding	151742316	151772532	5	-1	chromosome
ENSG00000180398	5342.97	-0.14392	0.0698324	-2.06066	0.0393356	0.413955	MCFD2	multiple coagulation factor deficiency 2 [Source:HGNC Symbol;Acc:HGNC:18451]	protein_coding	coding	46901870	46941855	2	-1	chromosome
ENSG00000176101	235.502	-0.258838	0.125408	-2.05954	0.0394427	0.41477	SSNA1	SS nuclear autoantigen 1 [Source:HGNC Symbol;Acc:HGNC:11321]	protein_coding	coding	137188647	137190370	9	1	chromosome
ENSG00000113575	2106.05	-0.198488	0.0964388	-2.05815	0.0395757	0.415856	PPP2CA	protein phosphatase 2 catalytic subunit alpha [Source:HGNC Symbol;Acc:HGNC:9299]	protein_coding	coding	134194334	134226142	5	-1	chromosome
ENSG00000120533	1163.07	-0.19992	0.0970862	-2.05768	0.0396211	0.415986	ENY2	ENY2, transcription and export complex 2 subunit [Source:HGNC Symbol;Acc:HGNC:24449]	protein_coding	coding	109334324	109345953	8	1	chromosome
ENSG00000185591	761.268	-0.210964	0.10253	-2.0574	0.0396474	0.415986	SP1	Sp1 transcription factor [Source:HGNC Symbol;Acc:HGNC:11205]	protein_coding	coding	53380176	53416446	12	1	chromosome
ENSG00000162627	404.674	0.219566	0.106785	2.05635	0.0397492	0.416742	SNX7	sorting nexin 7 [Source:HGNC Symbol;Acc:HGNC:14971]	protein_coding	coding	98661701	98760500	1	1	chromosome
ENSG00000120265	1428.53	-0.147303	0.0716704	-2.05503	0.0398757	0.417132	PCMT1	protein-L-isoaspartate (D-aspartate) O-methyltransferase [Source:HGNC Symbol;Acc:HGNC:8728]	protein_coding	coding	149749443	149811420	6	1	chromosome
ENSG00000161981	500.702	-0.220903	0.107326	-2.0554	0.0398401	0.417132	SNRNP25	small nuclear ribonucleoprotein U11/U12 subunit 25 [Source:HGNC Symbol;Acc:HGNC:14161]	protein_coding	coding	53010	57669	16	1	chromosome
ENSG00000183604	226.201	-0.256634	0.124721	-2.05513	0.0398661	0.417132	SMG1P5	SMG1P5, nonsense mediated mRNA decay associated PI3K related kinase pseudogene 5 [Source:HGNC Symbol;Acc:HGNC:49862]	transcribed_unprocessed_pseudogene	pseudo	30267553	30335374	16	-1	chromosome
ENSG00000103148	226.468	-0.267041	0.129903	-2.05392	0.0399835	0.417324	NPRL3	NPR3 like, GATOR1 complex subunit [Source:HGNC Symbol;Acc:HGNC:14124]	protein_coding	coding	84271	138860	16	-1	chromosome
ENSG00000231721	63.8214	0.28336	0.13792	2.05419	0.0399576	0.417324	LINC-PINT	long intergenic non-protein coding RNA, p53 induced transcript [Source:HGNC Symbol;Acc:HGNC:26885]	antisense_RNA	other	130941760	131110176	7	-1	chromosome
ENSG00000259426	12.1287	0.0952724	0.0561647	2.05424	0.0399522	0.417324	AC027237.3	NA	antisense_RNA	other	69396904	69415029	15	-1	chromosome
ENSG00000277027	20.9788	-0.0260896	0.0264982	-2.05274	0.0400979	0.418207	RMRP	RNA component of mitochondrial RNA processing endoribonuclease [Source:HGNC Symbol;Acc:HGNC:10031]	ribozyme	small	35657754	35658017	9	-1	chromosome
ENSG00000100028	1897.97	-0.149145	0.0727655	-2.04968	0.0403955	0.420997	SNRPD3	small nuclear ribonucleoprotein D3 polypeptide [Source:HGNC Symbol;Acc:HGNC:11160]	protein_coding	coding	24555503	24609980	22	1	chromosome
ENSG00000175595	255.808	-0.262513	0.127903	-2.04856	0.0405053	0.421349	ERCC4	ERCC excision repair 4, endonuclease catalytic subunit [Source:HGNC Symbol;Acc:HGNC:3436]	protein_coding	coding	13920157	13952345	16	1	chromosome
ENSG00000198840	13421.2	0.139124	0.0679001	2.04892	0.04047	0.421349	MT-ND3	mitochondrially encoded NADH:ubiquinone oxidoreductase core subunit 3 [Source:HGNC Symbol;Acc:HGNC:7458]	protein_coding	mito	10059	10404	MT	1	chromosome
ENSG00000280046	27.8503	0.247029	0.120671	2.04841	0.0405195	0.421349	AC104581.5	NA	TEC	other	7858943	7866083	17	1	chromosome
ENSG00000101138	745.723	-0.246105	0.120052	-2.04708	0.0406501	0.422393	CSTF1	cleavage stimulation factor subunit 1 [Source:HGNC Symbol;Acc:HGNC:2483]	protein_coding	coding	56392371	56406369	20	1	chromosome
ENSG00000141551	1377.51	-0.188343	0.0921105	-2.04433	0.0409212	0.422873	CSNK1D	casein kinase 1 delta [Source:HGNC Symbol;Acc:HGNC:2452]	protein_coding	coding	82239023	82273731	17	-1	chromosome
ENSG00000143256	525.59	-0.200771	0.0981732	-2.04431	0.0409227	0.422873	PFDN2	prefoldin subunit 2 [Source:HGNC Symbol;Acc:HGNC:8867]	protein_coding	coding	161100556	161118111	1	-1	chromosome
ENSG00000166147	61.1525	0.269413	0.131357	2.04574	0.0407822	0.422873	FBN1	fibrillin 1 [Source:HGNC Symbol;Acc:HGNC:3603]	protein_coding	coding	48408306	48645849	15	-1	chromosome
ENSG00000167315	1473.02	-0.150539	0.0736118	-2.04439	0.0409153	0.422873	ACAA2	acetyl-CoA acyltransferase 2 [Source:HGNC Symbol;Acc:HGNC:83]	protein_coding	coding	49782167	49813960	18	-1	chromosome
ENSG00000188786	299.372	0.279084	0.137097	2.04416	0.0409378	0.422873	MTF1	metal regulatory transcription factor 1 [Source:HGNC Symbol;Acc:HGNC:7428]	protein_coding	coding	37809567	37859620	1	-1	chromosome
ENSG00000221988	389.624	0.249186	0.121742	2.04619	0.0407375	0.422873	PPT2	palmitoyl-protein thioesterase 2 [Source:HGNC Symbol;Acc:HGNC:9326]	protein_coding	coding	32153441	32163680	6	1	chromosome
ENSG00000236810	23.1295	-0.196013	0.0981868	-2.04446	0.040908	0.422873	ELOA-AS1	ELOA antisense RNA 1 [Source:HGNC Symbol;Acc:HGNC:50582]	antisense_RNA	other	23760382	23778287	1	-1	chromosome
ENSG00000242294	103.804	-0.281773	0.137618	-2.04534	0.0408215	0.422873	STAG3L5P	stromal antigen 3-like 5 pseudogene [Source:HGNC Symbol;Acc:HGNC:48896]	transcribed_unprocessed_pseudogene	pseudo	100336079	100351900	7	1	chromosome
ENSG00000150768	1111.95	0.165904	0.081202	2.04356	0.0409973	0.423176	DLAT	dihydrolipoamide S-acetyltransferase [Source:HGNC Symbol;Acc:HGNC:2896]	protein_coding	coding	112024814	112064390	11	1	chromosome
ENSG00000132031	3104.54	-0.112442	0.0550432	-2.04273	0.0410795	0.4234	MATN3	matrilin 3 [Source:HGNC Symbol;Acc:HGNC:6909]	protein_coding	coding	19992111	20012694	2	-1	chromosome
ENSG00000167110	813.798	0.193449	0.0947151	2.04299	0.0410534	0.4234	GOLGA2	golgin A2 [Source:HGNC Symbol;Acc:HGNC:4425]	protein_coding	coding	128255829	128275995	9	-1	chromosome
ENSG00000168237	769.727	-0.180204	0.0882429	-2.04082	0.0412691	0.424729	GLYCTK	glycerate kinase [Source:HGNC Symbol;Acc:HGNC:24247]	protein_coding	coding	52287089	52293476	3	1	chromosome
ENSG00000196600	17.166	0.11053	0.0632918	2.04086	0.0412649	0.424729	SLC22A25	solute carrier family 22 member 25 [Source:HGNC Symbol;Acc:HGNC:32935]	protein_coding	coding	63163776	63229652	11	-1	chromosome
ENSG00000110092	3134.38	-0.158978	0.0779391	-2.03961	0.0413895	0.425376	CCND1	cyclin D1 [Source:HGNC Symbol;Acc:HGNC:1582]	protein_coding	coding	69641087	69654474	11	1	chromosome
ENSG00000143393	320.387	-0.253015	0.124246	-2.03953	0.0413971	0.425376	PI4KB	phosphatidylinositol 4-kinase beta [Source:HGNC Symbol;Acc:HGNC:8984]	protein_coding	coding	151291797	151327715	1	-1	chromosome
ENSG00000214050	13.8112	0.182496	0.0911	2.03927	0.0414231	0.425376	FBXO16	F-box protein 16 [Source:HGNC Symbol;Acc:HGNC:13618]	protein_coding	coding	28348287	28490318	8	-1	chromosome
ENSG00000149231	622.081	0.198809	0.0975683	2.03793	0.0415573	0.425727	CCDC82	coiled-coil domain containing 82 [Source:HGNC Symbol;Acc:HGNC:26282]	protein_coding	coding	96352769	96389923	11	-1	chromosome
ENSG00000169957	428.635	0.240892	0.118423	2.03752	0.0415977	0.425727	ZNF768	zinc finger protein 768 [Source:HGNC Symbol;Acc:HGNC:26273]	protein_coding	coding	30524001	30526821	16	-1	chromosome
ENSG00000183889	880.179	-0.193537	0.0949809	-2.03741	0.0416092	0.425727	AC138969.1	nuclear pore complex-interacting protein family member A5 isoform 2 [Source:RefSeq peptide;Acc:NP_001338129]	protein_coding	coding	16317444	16350590	16	1	chromosome
ENSG00000204371	849.329	-0.217434	0.106551	-2.03836	0.0415137	0.425727	EHMT2	euchromatic histone lysine methyltransferase 2 [Source:HGNC Symbol;Acc:HGNC:14129]	protein_coding	coding	31879759	31897687	6	-1	chromosome
ENSG00000246366	23.4834	0.141742	0.0767264	2.03754	0.0415961	0.425727	LACTB2-AS1	LACTB2 antisense RNA 1 [Source:HGNC Symbol;Acc:HGNC:27841]	antisense_RNA	other	70608577	70663279	8	1	chromosome
ENSG00000126231	80.1591	0.245169	0.122919	2.03653	0.0416973	0.426317	PROZ	protein Z, vitamin K dependent plasma glycoprotein [Source:HGNC Symbol;Acc:HGNC:9460]	protein_coding	coding	113158654	113172383	13	1	chromosome
ENSG00000135862	5330.93	-0.136497	0.0670359	-2.03619	0.041731	0.42635	LAMC1	laminin subunit gamma 1 [Source:HGNC Symbol;Acc:HGNC:6492]	protein_coding	coding	183023460	183145592	1	1	chromosome
ENSG00000181896	248.583	0.266541	0.131167	2.03546	0.0418051	0.426796	ZNF101	zinc finger protein 101 [Source:HGNC Symbol;Acc:HGNC:12881]	protein_coding	coding	19668796	19683509	19	1	chromosome
ENSG00000143627	161.565	-0.272186	0.134068	-2.03481	0.0418704	0.427151	PKLR	pyruvate kinase, liver and RBC [Source:HGNC Symbol;Acc:HGNC:9020]	protein_coding	coding	155289839	155301434	1	-1	chromosome
ENSG00000141696	523.994	-0.227921	0.111914	-2.03332	0.0420205	0.428225	P3H4	prolyl 3-hydroxylase family member 4 (non-enzymatic) [Source:HGNC Symbol;Acc:HGNC:16946]	protein_coding	coding	41801947	41812604	17	-1	chromosome
ENSG00000173480	120.501	0.281778	0.138959	2.03316	0.0420368	0.428225	ZNF417	zinc finger protein 417 [Source:HGNC Symbol;Acc:HGNC:20646]	protein_coding	coding	57900296	57916610	19	-1	chromosome
ENSG00000226752	136.776	0.281431	0.139294	2.03276	0.0420768	0.428321	PSMD5-AS1	PSMD5 antisense RNA 1 (head to head) [Source:HGNC Symbol;Acc:HGNC:27367]	transcribed_unitary_pseudogene	pseudo	120824828	120854385	9	1	chromosome
ENSG00000173614	193.838	0.258401	0.127106	2.03243	0.0421099	0.428346	NMNAT1	nicotinamide nucleotide adenylyltransferase 1 [Source:HGNC Symbol;Acc:HGNC:17877]	protein_coding	coding	9943428	9985501	1	1	chromosome
ENSG00000078898	2344.67	-0.150164	0.073896	-2.03179	0.0421748	0.428695	BPIFB2	BPI fold containing family B member 2 [Source:HGNC Symbol;Acc:HGNC:16177]	protein_coding	coding	33007600	33023709	20	1	chromosome
ENSG00000263327	25.2557	0.236235	0.118262	2.03118	0.0422364	0.42901	TAPT1-AS1	TAPT1 antisense RNA 1 (head to head) [Source:HGNC Symbol;Acc:HGNC:26832]	antisense_RNA	other	16226685	16320140	4	1	chromosome
ENSG00000102595	475.262	0.221164	0.108992	2.0293	0.0424275	0.42944	UGGT2	UDP-glucose glycoprotein glucosyltransferase 2 [Source:HGNC Symbol;Acc:HGNC:15664]	protein_coding	coding	95801580	96053482	13	-1	chromosome
ENSG00000104894	24.6903	0.178232	0.0933215	2.03013	0.0423434	0.42944	CD37	CD37 molecule [Source:HGNC Symbol;Acc:HGNC:1666]	protein_coding	coding	49335171	49343335	19	1	chromosome
ENSG00000111707	743.521	0.222702	0.109798	2.0289	0.0424687	0.42944	SUDS3	SDS3 homolog, SIN3A corepressor complex component [Source:HGNC Symbol;Acc:HGNC:29545]	protein_coding	coding	118376380	118418031	12	1	chromosome
ENSG00000125520	768.737	0.187691	0.0925469	2.02866	0.0424933	0.42944	SLC2A4RG	SLC2A4 regulator [Source:HGNC Symbol;Acc:HGNC:15930]	protein_coding	coding	63739861	63743505	20	1	chromosome
ENSG00000135953	429.009	0.248576	0.122475	2.02914	0.0424437	0.42944	MFSD9	major facilitator superfamily domain containing 9 [Source:HGNC Symbol;Acc:HGNC:28158]	protein_coding	coding	102715840	102736888	2	-1	chromosome
ENSG00000188549	119.702	-0.281283	0.137709	-2.02987	0.0423695	0.42944	C15orf52	chromosome 15 open reading frame 52 [Source:HGNC Symbol;Acc:HGNC:33488]	protein_coding	coding	40331452	40340967	15	-1	chromosome
ENSG00000224490	14.8798	0.185257	0.0949324	2.02976	0.0423811	0.42944	TTC21B-AS1	TTC21B antisense RNA 1 [Source:HGNC Symbol;Acc:HGNC:41115]	processed_transcript	other	165933857	165949891	2	1	chromosome
ENSG00000116871	210.35	0.268212	0.132026	2.02819	0.0425405	0.429607	MAP7D1	MAP7 domain containing 1 [Source:HGNC Symbol;Acc:HGNC:25514]	protein_coding	coding	36155579	36180849	1	1	chromosome
ENSG00000116685	1351.09	-0.185212	0.0913083	-2.02712	0.0426497	0.430345	KIAA2013	KIAA2013 [Source:HGNC Symbol;Acc:HGNC:28513]	protein_coding	coding	11919591	11926428	1	-1	chromosome
ENSG00000165630	201.007	0.271268	0.13424	2.02688	0.042675	0.430345	PRPF18	pre-mRNA processing factor 18 [Source:HGNC Symbol;Acc:HGNC:17351]	protein_coding	coding	13586927	13630868	10	1	chromosome
ENSG00000068903	274.27	0.27688	0.137268	2.02462	0.042906	0.432363	SIRT2	sirtuin 2 [Source:HGNC Symbol;Acc:HGNC:10886]	protein_coding	coding	38878555	38899862	19	-1	chromosome
ENSG00000065665	164.15	0.267046	0.132165	2.02343	0.0430291	0.432981	SEC61A2	Sec61 translocon alpha 2 subunit [Source:HGNC Symbol;Acc:HGNC:17702]	protein_coding	coding	12129637	12169961	10	1	chromosome
ENSG00000155097	1031.34	0.164538	0.0813351	2.02363	0.0430083	0.432981	ATP6V1C1	ATPase H+ transporting V1 subunit C1 [Source:HGNC Symbol;Acc:HGNC:856]	protein_coding	coding	103021063	103073051	8	1	chromosome
ENSG00000136240	4802.08	0.142654	0.0705327	2.02274	0.0431002	0.433074	KDELR2	KDEL endoplasmic reticulum protein retention receptor 2 [Source:HGNC Symbol;Acc:HGNC:6305]	protein_coding	coding	6445953	6484242	7	-1	chromosome
ENSG00000163608	471.709	0.236134	0.116884	2.02283	0.0430907	0.433074	NEPRO	nucleolus and neural progenitor protein [Source:HGNC Symbol;Acc:HGNC:24496]	protein_coding	coding	113002440	113019861	3	-1	chromosome
ENSG00000120832	188.314	0.270941	0.134239	2.02199	0.0431772	0.433226	MTERF2	mitochondrial transcription termination factor 2 [Source:HGNC Symbol;Acc:HGNC:30779]	protein_coding	coding	106977291	106987166	12	-1	chromosome
ENSG00000180210	3590.18	-0.143177	0.0707908	-2.02217	0.0431584	0.433226	F2	coagulation factor II, thrombin [Source:HGNC Symbol;Acc:HGNC:3535]	protein_coding	coding	46719180	46739506	11	1	chromosome
ENSG00000112701	854.94	0.196948	0.0974168	2.02144	0.0432339	0.433484	SENP6	SUMO1/sentrin specific peptidase 6 [Source:HGNC Symbol;Acc:HGNC:20944]	protein_coding	coding	75601509	75718278	6	1	chromosome
ENSG00000017797	802.481	0.168429	0.083362	2.02085	0.0432956	0.433792	RALBP1	ralA binding protein 1 [Source:HGNC Symbol;Acc:HGNC:9841]	protein_coding	coding	9475009	9538116	18	1	chromosome
ENSG00000184304	23.6134	0.146968	0.0795107	2.01969	0.0434153	0.43468	PRKD1	protein kinase D1 [Source:HGNC Symbol;Acc:HGNC:9407]	protein_coding	coding	29576479	30191898	14	-1	chromosome
ENSG00000159761	30.1977	0.199468	0.101181	2.0188	0.0435085	0.435302	C16orf86	chromosome 16 open reading frame 86 [Source:HGNC Symbol;Acc:HGNC:33755]	protein_coding	coding	67666816	67668758	16	1	chromosome
ENSG00000144713	5097.09	-0.139877	0.0693015	-2.01809	0.0435818	0.435724	RPL32	ribosomal protein L32 [Source:HGNC Symbol;Acc:HGNC:10336]	protein_coding	coding	12834485	12841588	3	-1	chromosome
ENSG00000198791	1510.6	0.178996	0.0887578	2.01769	0.0436235	0.43583	CNOT7	CCR4-NOT transcription complex subunit 7 [Source:HGNC Symbol;Acc:HGNC:14101]	protein_coding	coding	17224964	17246878	8	-1	chromosome
ENSG00000131269	322.844	0.274469	0.136434	2.01709	0.0436857	0.43614	ABCB7	ATP binding cassette subfamily B member 7 [Source:HGNC Symbol;Acc:HGNC:48]	protein_coding	coding	75053172	75156732	X	-1	chromosome
ENSG00000108510	1024.08	-0.218243	0.108127	-2.01629	0.0437696	0.436667	MED13	mediator complex subunit 13 [Source:HGNC Symbol;Acc:HGNC:22474]	protein_coding	coding	61942605	62065282	17	-1	chromosome
ENSG00000100815	577.374	0.268194	0.133629	2.01116	0.0443083	0.440393	TRIP11	thyroid hormone receptor interactor 11 [Source:HGNC Symbol;Acc:HGNC:12305]	protein_coding	coding	91965991	92040896	14	-1	chromosome
ENSG00000132773	248.988	-0.246203	0.122069	-2.01204	0.0442162	0.440393	TOE1	target of EGR1, member 1 (nuclear) [Source:HGNC Symbol;Acc:HGNC:15954]	protein_coding	coding	45339670	45343975	1	1	chromosome
ENSG00000146267	20.8543	0.181845	0.0952603	2.01067	0.0443605	0.440393	FAXC	failed axon connections homolog [Source:HGNC Symbol;Acc:HGNC:20742]	protein_coding	coding	99271169	99350062	6	-1	chromosome
ENSG00000152443	265.229	0.276566	0.138493	2.01088	0.0443377	0.440393	ZNF776	zinc finger protein 776 [Source:HGNC Symbol;Acc:HGNC:26765]	protein_coding	coding	57746796	57758159	19	1	chromosome
ENSG00000172171	160.593	0.264569	0.131684	2.01064	0.0443632	0.440393	TEFM	transcription elongation factor, mitochondrial [Source:HGNC Symbol;Acc:HGNC:26223]	protein_coding	coding	30897336	30906820	17	-1	chromosome
ENSG00000173575	1597.27	-0.150395	0.0747315	-2.01176	0.0442452	0.440393	CHD2	chromodomain helicase DNA binding protein 2 [Source:HGNC Symbol;Acc:HGNC:1917]	protein_coding	coding	92900189	93028005	15	1	chromosome
ENSG00000175984	20.8895	0.0961746	0.057727	2.01197	0.044223	0.440393	DENND2C	DENN domain containing 2C [Source:HGNC Symbol;Acc:HGNC:24748]	protein_coding	coding	114582848	114670422	1	-1	chromosome
ENSG00000008517	1200.94	0.159022	0.0791794	2.00903	0.0445338	0.44107	IL32	interleukin 32 [Source:HGNC Symbol;Acc:HGNC:16830]	protein_coding	coding	3065297	3082192	16	1	chromosome
ENSG00000105997	139.156	0.274835	0.136723	2.00876	0.0445624	0.44107	HOXA3	homeobox A3 [Source:HGNC Symbol;Acc:HGNC:5104]	protein_coding	coding	27106184	27152581	7	-1	chromosome
ENSG00000138759	3611.41	-0.137237	0.068332	-2.00851	0.0445888	0.44107	FRAS1	Fraser extracellular matrix complex subunit 1 [Source:HGNC Symbol;Acc:HGNC:19185]	protein_coding	coding	78057570	78544269	4	1	chromosome
ENSG00000185615	18.7938	0.180149	0.0935531	2.00861	0.044579	0.44107	PDIA2	protein disulfide isomerase family A member 2 [Source:HGNC Symbol;Acc:HGNC:14180]	protein_coding	coding	283152	287215	16	1	chromosome
ENSG00000242125	1681.77	0.147747	0.0735269	2.00965	0.0444687	0.44107	SNHG3	small nucleolar RNA host gene 3 [Source:HGNC Symbol;Acc:HGNC:10118]	sense_intronic	other	28505980	28510892	1	1	chromosome
ENSG00000223482	173.644	0.269363	0.134252	2.00738	0.0447087	0.441866	NUTM2A-AS1	NUTM2A antisense RNA 1 [Source:HGNC Symbol;Acc:HGNC:45161]	antisense_RNA	other	87203875	87342612	10	-1	chromosome
ENSG00000257345	230.413	-0.244109	0.121486	-2.00716	0.0447323	0.441866	LINC02413	long intergenic non-protein coding RNA 2413 [Source:HGNC Symbol;Acc:HGNC:53342]	lincRNA	noncoding	92999218	93019820	12	1	chromosome
ENSG00000227695	11.8015	-0.192338	0.0980874	-2.00501	0.0449625	0.443826	DNMBP-AS1	DNMBP antisense RNA 1 [Source:HGNC Symbol;Acc:HGNC:20431]	antisense_RNA	other	99927010	99958381	10	1	chromosome
ENSG00000126870	102.178	0.270588	0.136192	2.00448	0.0450188	0.44407	WDR60	WD repeat domain 60 [Source:HGNC Symbol;Acc:HGNC:21862]	protein_coding	coding	158856578	158956747	7	1	chromosome
ENSG00000039987	11.5969	0.083937	0.0526739	2.00284	0.0451949	0.444554	BEST2	bestrophin 2 [Source:HGNC Symbol;Acc:HGNC:17107]	protein_coding	coding	12751702	12758458	19	1	chromosome
ENSG00000105568	1433.69	-0.166442	0.0830704	-2.00354	0.0451189	0.444554	PPP2R1A	protein phosphatase 2 scaffold subunit Aalpha [Source:HGNC Symbol;Acc:HGNC:9302]	protein_coding	coding	52190039	52229533	19	1	chromosome
ENSG00000118985	2177.14	0.205551	0.102677	2.00291	0.0451868	0.444554	ELL2	elongation factor for RNA polymerase II 2 [Source:HGNC Symbol;Acc:HGNC:17064]	protein_coding	coding	95885098	95962071	5	-1	chromosome
ENSG00000164163	1954.61	-0.140126	0.0699467	-2.00284	0.0451947	0.444554	ABCE1	ATP binding cassette subfamily E member 1 [Source:HGNC Symbol;Acc:HGNC:69]	protein_coding	coding	145097932	145129179	4	1	chromosome
ENSG00000135457	383.757	-0.22274	0.111177	-2.00192	0.0452936	0.4449	TFCP2	transcription factor CP2 [Source:HGNC Symbol;Acc:HGNC:11748]	protein_coding	coding	51093663	51173134	12	-1	chromosome
ENSG00000139178	452.155	0.208682	0.104284	2.00133	0.0453571	0.4449	C1RL	complement C1r subcomponent like [Source:HGNC Symbol;Acc:HGNC:21265]	protein_coding	coding	7089587	7109273	12	-1	chromosome
ENSG00000160325	198.835	-0.278509	0.138896	-2.00155	0.045333	0.4449	CACFD1	calcium channel flower domain containing 1 [Source:HGNC Symbol;Acc:HGNC:1365]	protein_coding	coding	133459965	133470848	9	1	chromosome
ENSG00000197275	190.412	0.27509	0.138518	2.00182	0.0453042	0.4449	RAD54B	RAD54 homolog B (S. cerevisiae) [Source:HGNC Symbol;Acc:HGNC:17228]	protein_coding	coding	94371960	94475109	8	-1	chromosome
ENSG00000103978	551.944	0.220658	0.110415	2.00083	0.0454109	0.445116	TMEM87A	transmembrane protein 87A [Source:HGNC Symbol;Acc:HGNC:24522]	protein_coding	coding	42210452	42273663	15	-1	chromosome
ENSG00000003400	385.707	0.243851	0.121979	1.99994	0.0455063	0.445739	CASP10	caspase 10 [Source:HGNC Symbol;Acc:HGNC:1500]	protein_coding	coding	201182881	201229406	2	1	chromosome
ENSG00000239704	34.4927	0.222316	0.111704	1.99933	0.0455729	0.44608	CDRT4	CMT1A duplicated region transcript 4 [Source:HGNC Symbol;Acc:HGNC:14383]	protein_coding	coding	15436015	15503608	17	-1	chromosome
ENSG00000139117	33.1366	0.251949	0.125601	1.99836	0.0456773	0.446233	CPNE8	copine 8 [Source:HGNC Symbol;Acc:HGNC:23498]	protein_coding	coding	38646822	38907430	12	-1	chromosome
ENSG00000175727	374.667	-0.223348	0.111738	-1.99852	0.0456601	0.446233	MLXIP	MLX interacting protein [Source:HGNC Symbol;Acc:HGNC:17055]	protein_coding	coding	122078722	122147347	12	1	chromosome
ENSG00000236445	11.3241	0.0237413	0.0252339	1.9983	0.0456842	0.446233	LINC00608	long intergenic non-protein coding RNA 608 [Source:HGNC Symbol;Acc:HGNC:27179]	antisense_RNA	other	218975393	218989940	2	1	chromosome
ENSG00000150990	461.904	-0.219524	0.109758	-1.99783	0.0457355	0.446272	DHX37	DEAH-box helicase 37 [Source:HGNC Symbol;Acc:HGNC:17210]	protein_coding	coding	124946825	124989122	12	-1	chromosome
ENSG00000197930	1844.54	0.167322	0.0837729	1.9973	0.0457925	0.446272	ERO1A	endoplasmic reticulum oxidoreductase 1 alpha [Source:HGNC Symbol;Acc:HGNC:13280]	protein_coding	coding	52639916	52695900	14	-1	chromosome
ENSG00000260912	40.3294	0.268367	0.134299	1.99725	0.0457984	0.446272	AL158206.1	NA	sense_overlapping	other	19453209	19455173	9	1	chromosome
ENSG00000274602	433.933	-0.210308	0.105168	-1.99709	0.0458156	0.446272	PI4KAP1	phosphatidylinositol 4-kinase alpha pseudogene 1 [Source:HGNC Symbol;Acc:HGNC:33576]	transcribed_unprocessed_pseudogene	pseudo	18533646	18577968	22	-1	chromosome
ENSG00000112651	449.739	-0.226627	0.113441	-1.99585	0.0459503	0.446637	MRPL2	mitochondrial ribosomal protein L2 [Source:HGNC Symbol;Acc:HGNC:14056]	protein_coding	coding	43054029	43059806	6	-1	chromosome
ENSG00000115295	45.5939	0.0527441	0.039579	1.99611	0.0459219	0.446637	CLIP4	CAP-Gly domain containing linker protein family member 4 [Source:HGNC Symbol;Acc:HGNC:26108]	protein_coding	coding	29097705	29189643	2	1	chromosome
ENSG00000162614	61.9014	0.275574	0.13785	1.9959	0.0459448	0.446637	NEXN	nexilin F-actin binding protein [Source:HGNC Symbol;Acc:HGNC:29557]	protein_coding	coding	77888513	77943895	1	1	chromosome
ENSG00000229267	19.2277	0.187215	0.0957227	1.99557	0.0459806	0.446637	AC016708.1	NA	antisense_RNA	other	214810229	214963274	2	1	chromosome
ENSG00000105618	613.035	-0.182487	0.0914051	-1.99516	0.0460258	0.446766	PRPF31	pre-mRNA processing factor 31 [Source:HGNC Symbol;Acc:HGNC:15446]	protein_coding	coding	54115410	54131719	19	1	chromosome
ENSG00000180964	362.294	0.226995	0.113742	1.99479	0.0460654	0.446841	TCEAL8	transcription elongation factor A like 8 [Source:HGNC Symbol;Acc:HGNC:28683]	protein_coding	coding	103252995	103255203	X	-1	chromosome
ENSG00000138780	301.904	-0.240663	0.120598	-1.99439	0.0461093	0.446957	GSTCD	glutathione S-transferase C-terminal domain containing [Source:HGNC Symbol;Acc:HGNC:25806]	protein_coding	coding	105708778	105847728	4	1	chromosome
ENSG00000080371	605.934	-0.216005	0.108246	-1.99405	0.0461463	0.447001	RAB21	RAB21, member RAS oncogene family [Source:HGNC Symbol;Acc:HGNC:18263]	protein_coding	coding	71754874	71800285	12	1	chromosome
ENSG00000176783	396.877	0.243562	0.122336	1.99377	0.0461776	0.447001	RUFY1	RUN and FYVE domain containing 1 [Source:HGNC Symbol;Acc:HGNC:19760]	protein_coding	coding	179550558	179610026	5	1	chromosome
ENSG00000152894	2207.36	-0.160472	0.0805094	-1.99339	0.0462189	0.447091	PTPRK	protein tyrosine phosphatase, receptor type K [Source:HGNC Symbol;Acc:HGNC:9674]	protein_coding	coding	127968779	128520674	6	-1	chromosome
ENSG00000076067	198.18	-0.276573	0.138105	-1.99216	0.0463533	0.447176	RBMS2	RNA binding motif single stranded interacting protein 2 [Source:HGNC Symbol;Acc:HGNC:9909]	protein_coding	coding	56521929	56596196	12	1	chromosome
ENSG00000099821	641.746	-0.220293	0.110554	-1.99098	0.0464831	0.447176	POLRMT	RNA polymerase mitochondrial [Source:HGNC Symbol;Acc:HGNC:9200]	protein_coding	coding	617224	633604	19	-1	chromosome
ENSG00000111530	1931.86	-0.15099	0.0758221	-1.99113	0.0464667	0.447176	CAND1	cullin associated and neddylation dissociated 1 [Source:HGNC Symbol;Acc:HGNC:30688]	protein_coding	coding	67269281	67319951	12	1	chromosome
ENSG00000125954	28.6487	-0.195175	0.102583	-1.99132	0.0464456	0.447176	CHURC1-FNTB	CHURC1-FNTB readthrough [Source:HGNC Symbol;Acc:HGNC:42960]	protein_coding	coding	64914485	65061803	14	1	chromosome
ENSG00000129071	351.222	0.24511	0.123398	1.99122	0.0464562	0.447176	MBD4	methyl-CpG binding domain 4, DNA glycosylase [Source:HGNC Symbol;Acc:HGNC:6919]	protein_coding	coding	129430944	129440179	3	-1	chromosome
ENSG00000137267	387.289	-0.237183	0.118853	-1.99183	0.0463894	0.447176	TUBB2A	tubulin beta 2A class IIa [Source:HGNC Symbol;Acc:HGNC:12412]	protein_coding	coding	3153669	3157526	6	-1	chromosome
ENSG00000160602	133.664	-0.275446	0.139323	-1.99189	0.0463834	0.447176	NEK8	NIMA related kinase 8 [Source:HGNC Symbol;Acc:HGNC:13387]	protein_coding	coding	28725897	28743455	17	1	chromosome
ENSG00000204568	960.94	0.176988	0.0889087	1.99099	0.046482	0.447176	MRPS18B	mitochondrial ribosomal protein S18B [Source:HGNC Symbol;Acc:HGNC:14516]	protein_coding	coding	30617709	30626395	6	1	chromosome
ENSG00000116014	38.6907	-0.250316	0.12532	-1.99061	0.0465241	0.447263	KISS1R	KISS1 receptor [Source:HGNC Symbol;Acc:HGNC:4510]	protein_coding	coding	917287	921015	19	1	chromosome
ENSG00000069248	839.753	-0.200317	0.100623	-1.98919	0.0466803	0.448458	NUP133	nucleoporin 133 [Source:HGNC Symbol;Acc:HGNC:18016]	protein_coding	coding	229440260	229508341	1	-1	chromosome
ENSG00000101558	2307.24	-0.141053	0.070949	-1.98805	0.0468061	0.449006	VAPA	VAMP associated protein A [Source:HGNC Symbol;Acc:HGNC:12648]	protein_coding	coding	9914002	9960021	18	1	chromosome
ENSG00000148730	1388.37	0.134422	0.067633	1.9878	0.0468336	0.449006	EIF4EBP2	eukaryotic translation initiation factor 4E binding protein 2 [Source:HGNC Symbol;Acc:HGNC:3289]	protein_coding	coding	70404379	70428618	10	1	chromosome
ENSG00000197951	82.0744	0.271536	0.136256	1.98811	0.0467994	0.449006	ZNF71	zinc finger protein 71 [Source:HGNC Symbol;Acc:HGNC:13141]	protein_coding	coding	56595264	56626481	19	1	chromosome
ENSG00000159199	903.754	-0.208632	0.104902	-1.98676	0.0469487	0.449187	ATP5G1	ATP synthase, H+ transporting, mitochondrial Fo complex subunit C1 (subunit 9) [Source:HGNC Symbol;Acc:HGNC:841]	protein_coding	coding	48892765	48895871	17	1	chromosome
ENSG00000175220	457.722	-0.206067	0.10372	-1.98696	0.0469264	0.449187	ARHGAP1	Rho GTPase activating protein 1 [Source:HGNC Symbol;Acc:HGNC:673]	protein_coding	coding	46677080	46700615	11	-1	chromosome
ENSG00000181625	379.298	-0.268951	0.134944	-1.98691	0.046932	0.449187	SLX1B	SLX1 homolog B, structure-specific endonuclease subunit [Source:HGNC Symbol;Acc:HGNC:28748]	protein_coding	coding	29454501	29458219	16	1	chromosome
ENSG00000091129	110.052	0.274643	0.138524	1.98642	0.0469868	0.449245	NRCAM	neuronal cell adhesion molecule [Source:HGNC Symbol;Acc:HGNC:7994]	protein_coding	coding	108147623	108456717	7	-1	chromosome
ENSG00000076650	179.707	0.270289	0.135943	1.98555	0.0470831	0.449859	GPATCH1	G-patch domain containing 1 [Source:HGNC Symbol;Acc:HGNC:24658]	protein_coding	coding	33080880	33130542	19	1	chromosome
ENSG00000100425	360.207	0.257524	0.130316	1.98173	0.0475097	0.451154	BRD1	bromodomain containing 1 [Source:HGNC Symbol;Acc:HGNC:1102]	protein_coding	coding	49773283	49827512	22	-1	chromosome
ENSG00000101161	2398.46	-0.126621	0.0638554	-1.9827	0.0474008	0.451154	PRPF6	pre-mRNA processing factor 6 [Source:HGNC Symbol;Acc:HGNC:15860]	protein_coding	coding	63981135	64033100	20	1	chromosome
ENSG00000105438	1966.52	-0.164801	0.0831258	-1.98203	0.0474759	0.451154	KDELR1	KDEL endoplasmic reticulum protein retention receptor 1 [Source:HGNC Symbol;Acc:HGNC:6304]	protein_coding	coding	48382570	48391553	19	-1	chromosome
ENSG00000112699	1097.04	0.168133	0.0847414	1.98385	0.047273	0.451154	GMDS	GDP-mannose 4,6-dehydratase [Source:HGNC Symbol;Acc:HGNC:4369]	protein_coding	coding	1623806	2245692	6	-1	chromosome
ENSG00000112715	1015.62	-0.213882	0.107782	-1.98323	0.0473422	0.451154	VEGFA	vascular endothelial growth factor A [Source:HGNC Symbol;Acc:HGNC:12680]	protein_coding	coding	43770184	43786487	6	1	chromosome
ENSG00000124356	790.942	0.199717	0.100852	1.98196	0.0474834	0.451154	STAMBP	STAM binding protein [Source:HGNC Symbol;Acc:HGNC:16950]	protein_coding	coding	73828916	73873659	2	1	chromosome
ENSG00000126351	232.915	-0.254678	0.12847	-1.98153	0.0475319	0.451154	THRA	thyroid hormone receptor, alpha [Source:HGNC Symbol;Acc:HGNC:11796]	protein_coding	coding	40058290	40093867	17	1	chromosome
ENSG00000146648	356.172	0.265989	0.134663	1.98116	0.047573	0.451154	EGFR	epidermal growth factor receptor [Source:HGNC Symbol;Acc:HGNC:3236]	protein_coding	coding	55019021	55211628	7	1	chromosome
ENSG00000171016	32.0943	0.250772	0.126537	1.98251	0.0474218	0.451154	PYGO1	pygopus family PHD finger 1 [Source:HGNC Symbol;Acc:HGNC:30256]	protein_coding	coding	55538890	55588947	15	-1	chromosome
ENSG00000198932	35.9277	0.186528	0.0986964	1.98133	0.0475545	0.451154	GPRASP1	G protein-coupled receptor associated sorting protein 1 [Source:HGNC Symbol;Acc:HGNC:24834]	protein_coding	coding	102651366	102659083	X	1	chromosome
ENSG00000205903	153.608	-0.276681	0.139046	-1.98366	0.0472935	0.451154	ZNF316	zinc finger protein 316 [Source:HGNC Symbol;Acc:HGNC:13843]	protein_coding	coding	6637322	6656432	7	1	chromosome
ENSG00000198755	7478.64	-0.129458	0.065376	-1.98002	0.0477007	0.45206	RPL10A	ribosomal protein L10a [Source:HGNC Symbol;Acc:HGNC:10299]	protein_coding	coding	35468408	35470785	6	1	chromosome
ENSG00000197860	280.08	0.26289	0.133148	1.97973	0.0477337	0.452066	SGTB	small glutamine rich tetratricopeptide repeat containing beta [Source:HGNC Symbol;Acc:HGNC:23567]	protein_coding	coding	65665928	65723035	5	-1	chromosome
ENSG00000152422	131.693	0.266061	0.134342	1.97909	0.0478063	0.452142	XRCC4	X-ray repair cross complementing 4 [Source:HGNC Symbol;Acc:HGNC:12831]	protein_coding	coding	83077498	83353787	5	1	chromosome
ENSG00000198198	226.044	-0.263683	0.133434	-1.97913	0.0478009	0.452142	SZT2	SZT2, KICSTOR complex subunit [Source:HGNC Symbol;Acc:HGNC:29040]	protein_coding	coding	43389882	43454247	1	1	chromosome
ENSG00000148019	476.124	0.199595	0.100938	1.97815	0.0479114	0.45283	CEP78	centrosomal protein 78 [Source:HGNC Symbol;Acc:HGNC:25740]	protein_coding	coding	78236062	78279690	9	1	chromosome
ENSG00000102241	855.093	0.194711	0.0985943	1.97654	0.0480941	0.45383	HTATSF1	HIV-1 Tat specific factor 1 [Source:HGNC Symbol;Acc:HGNC:5276]	protein_coding	coding	136497079	136512346	X	1	chromosome
ENSG00000156381	130.527	-0.272157	0.137966	-1.97636	0.0481143	0.45383	ANKRD9	ankyrin repeat domain 9 [Source:HGNC Symbol;Acc:HGNC:20096]	protein_coding	coding	102501760	102509799	14	-1	chromosome
ENSG00000183793	191.437	-0.262294	0.134393	-1.9767	0.0480754	0.45383	NPIPA5	nuclear pore complex interacting protein family member A5 [Source:HGNC Symbol;Acc:HGNC:41980]	protein_coding	coding	15363624	15381047	16	-1	chromosome
ENSG00000079308	76.8183	0.275022	0.139382	1.97388	0.0483959	0.454705	TNS1	tensin 1 [Source:HGNC Symbol;Acc:HGNC:11973]	protein_coding	coding	217799789	218002995	2	-1	chromosome
ENSG00000100401	1246.32	-0.168677	0.0854178	-1.97405	0.0483761	0.454705	RANGAP1	Ran GTPase activating protein 1 [Source:HGNC Symbol;Acc:HGNC:9854]	protein_coding	coding	41245611	41286251	22	-1	chromosome
ENSG00000118894	211.25	-0.261635	0.13243	-1.97391	0.0483917	0.454705	EEF2KMT	eukaryotic elongation factor 2 lysine methyltransferase [Source:HGNC Symbol;Acc:HGNC:32221]	protein_coding	coding	5084304	5097808	16	-1	chromosome
ENSG00000151092	538.449	0.186048	0.0942623	1.97449	0.0483255	0.454705	NGLY1	N-glycanase 1 [Source:HGNC Symbol;Acc:HGNC:17646]	protein_coding	coding	25718944	25790039	3	-1	chromosome
ENSG00000174514	17.9125	-0.186846	0.0973006	-1.97382	0.0484019	0.454705	MFSD4A	major facilitator superfamily domain containing 4A [Source:HGNC Symbol;Acc:HGNC:25433]	protein_coding	coding	205568885	205602918	1	1	chromosome
ENSG00000179364	326.861	-0.254114	0.12837	-1.97485	0.0482857	0.454705	PACS2	phosphofurin acidic cluster sorting protein 2 [Source:HGNC Symbol;Acc:HGNC:23794]	protein_coding	coding	105300563	105398147	14	1	chromosome
ENSG00000173258	30.9309	0.238815	0.121368	1.97298	0.0484979	0.455302	ZNF483	zinc finger protein 483 [Source:HGNC Symbol;Acc:HGNC:23384]	protein_coding	coding	111525159	111577844	9	1	chromosome
ENSG00000075234	1039.98	-0.177456	0.0899855	-1.97228	0.0485782	0.455445	TTC38	tetratricopeptide repeat domain 38 [Source:HGNC Symbol;Acc:HGNC:26082]	protein_coding	coding	46267961	46294008	22	1	chromosome
ENSG00000164109	1325.82	0.16241	0.0823632	1.97238	0.0485667	0.455445	MAD2L1	mitotic arrest deficient 2 like 1 [Source:HGNC Symbol;Acc:HGNC:6763]	protein_coding	coding	120055608	120067074	4	-1	chromosome
ENSG00000061676	2750	-0.132003	0.0669505	-1.97167	0.0486472	0.455482	NCKAP1	NCK associated protein 1 [Source:HGNC Symbol;Acc:HGNC:7666]	protein_coding	coding	182909115	183038858	2	-1	chromosome
ENSG00000112282	788.795	0.212409	0.107846	1.97176	0.0486365	0.455482	MED23	mediator complex subunit 23 [Source:HGNC Symbol;Acc:HGNC:2372]	protein_coding	coding	131573966	131628229	6	-1	chromosome
ENSG00000102471	507.201	0.186852	0.0949157	1.9692	0.0489297	0.45569	NDFIP2	Nedd4 family interacting protein 2 [Source:HGNC Symbol;Acc:HGNC:18537]	protein_coding	coding	79481124	79556075	13	1	chromosome
ENSG00000115009	535.713	0.20169	0.102395	1.97062	0.0487669	0.45569	CCL20	C-C motif chemokine ligand 20 [Source:HGNC Symbol;Acc:HGNC:10619]	protein_coding	coding	227813842	227817564	2	1	chromosome
ENSG00000124006	1125.58	-0.165204	0.083828	-1.9703	0.0488035	0.45569	OBSL1	obscurin like 1 [Source:HGNC Symbol;Acc:HGNC:29092]	protein_coding	coding	219550729	219571859	2	-1	chromosome
ENSG00000138095	6476.8	-0.157959	0.0801765	-1.97026	0.0488085	0.45569	LRPPRC	leucine rich pentatricopeptide repeat containing [Source:HGNC Symbol;Acc:HGNC:15714]	protein_coding	coding	43886508	43996005	2	-1	chromosome
ENSG00000138823	1071.2	-0.17633	0.0894885	-1.96943	0.0489038	0.45569	MTTP	microsomal triglyceride transfer protein [Source:HGNC Symbol;Acc:HGNC:7467]	protein_coding	coding	99563761	99623999	4	1	chromosome
ENSG00000147804	675.181	0.201262	0.102144	1.97036	0.0487975	0.45569	SLC39A4	solute carrier family 39 member 4 [Source:HGNC Symbol;Acc:HGNC:17129]	protein_coding	coding	144409742	144416895	8	-1	chromosome
ENSG00000162814	20.4272	-0.216652	0.112043	-1.96942	0.0489049	0.45569	SPATA17	spermatogenesis associated 17 [Source:HGNC Symbol;Acc:HGNC:25184]	protein_coding	coding	217631324	217871696	1	1	chromosome
ENSG00000276308	42.6156	-0.210635	0.107967	-1.96997	0.0488417	0.45569	AC078880.4	NA	lincRNA	noncoding	115318657	115320405	12	-1	chromosome
ENSG00000198763	35779.3	-0.105104	0.0533906	-1.96856	0.0490038	0.456078	MT-ND2	mitochondrially encoded NADH:ubiquinone oxidoreductase core subunit 2 [Source:HGNC Symbol;Acc:HGNC:7456]	protein_coding	mito	4470	5511	MT	1	chromosome
ENSG00000142192	3279.42	-0.147286	0.0748693	-1.96725	0.049154	0.457171	APP	amyloid beta precursor protein [Source:HGNC Symbol;Acc:HGNC:620]	protein_coding	coding	25880550	26171128	21	-1	chromosome
ENSG00000186812	259.217	0.268028	0.136849	1.96673	0.0492148	0.457434	ZNF397	zinc finger protein 397 [Source:HGNC Symbol;Acc:HGNC:18818]	protein_coding	coding	35241030	35267133	18	1	chromosome
ENSG00000005471	230.026	0.23776	0.121521	1.96017	0.0499756	0.459117	ABCB4	ATP binding cassette subfamily B member 4 [Source:HGNC Symbol;Acc:HGNC:45]	protein_coding	coding	87401697	87480435	7	-1	chromosome
ENSG00000082269	672.816	0.26415	0.134738	1.9647	0.0494492	0.459117	FAM135A	family with sequence similarity 135 member A [Source:HGNC Symbol;Acc:HGNC:21084]	protein_coding	coding	70412941	70561174	6	1	chromosome
ENSG00000100490	425.525	0.27032	0.138655	1.95972	0.0500281	0.459117	CDKL1	cyclin dependent kinase like 1 [Source:HGNC Symbol;Acc:HGNC:1781]	protein_coding	coding	50329404	50416461	14	-1	chromosome
ENSG00000101413	1023.78	0.18803	0.0960074	1.95966	0.0500356	0.459117	RPRD1B	regulation of nuclear pre-mRNA domain containing 1B [Source:HGNC Symbol;Acc:HGNC:16209]	protein_coding	coding	38033546	38127780	20	1	chromosome
ENSG00000104859	297.896	-0.251022	0.127628	-1.96369	0.0495665	0.459117	CLASRP	CLK4 associating serine/arginine rich protein [Source:HGNC Symbol;Acc:HGNC:17731]	protein_coding	coding	45039040	45070956	19	1	chromosome
ENSG00000105193	5157.96	-0.119677	0.0610454	-1.96028	0.0499629	0.459117	RPS16	ribosomal protein S16 [Source:HGNC Symbol;Acc:HGNC:10396]	protein_coding	coding	39433207	39435948	19	-1	chromosome
ENSG00000108950	58.6	0.268544	0.13766	1.96009	0.0499848	0.459117	FAM20A	FAM20A, golgi associated secretory pathway pseudokinase [Source:HGNC Symbol;Acc:HGNC:23015]	protein_coding	coding	68535113	68601389	17	-1	chromosome
ENSG00000114744	507.027	0.211525	0.107816	1.96067	0.0499176	0.459117	COMMD2	COMM domain containing 2 [Source:HGNC Symbol;Acc:HGNC:24993]	protein_coding	coding	149738470	149752499	3	-1	chromosome
ENSG00000116560	4345.8	-0.125298	0.0638989	-1.9608	0.0499028	0.459117	SFPQ	splicing factor proline and glutamine rich [Source:HGNC Symbol;Acc:HGNC:10774]	protein_coding	coding	35176378	35193148	1	-1	chromosome
ENSG00000136925	335.651	-0.217106	0.110611	-1.96035	0.0499549	0.459117	TSTD2	thiosulfate sulfurtransferase like domain containing 2 [Source:HGNC Symbol;Acc:HGNC:30087]	protein_coding	coding	97600080	97633575	9	-1	chromosome
ENSG00000142875	163.063	0.271452	0.1394	1.96053	0.0499341	0.459117	PRKACB	protein kinase cAMP-activated catalytic subunit beta [Source:HGNC Symbol;Acc:HGNC:9381]	protein_coding	coding	84078062	84238498	1	1	chromosome
ENSG00000143771	415.365	-0.210533	0.107306	-1.96036	0.0499542	0.459117	CNIH4	cornichon family AMPA receptor auxiliary protein 4 [Source:HGNC Symbol;Acc:HGNC:25013]	protein_coding	coding	224356850	224379459	1	1	chromosome
ENSG00000157353	121.134	-0.269854	0.136924	-1.963	0.0496457	0.459117	FUK	fucokinase [Source:HGNC Symbol;Acc:HGNC:29500]	protein_coding	coding	70454421	70480274	16	1	chromosome
ENSG00000159685	135.273	0.262051	0.133666	1.96401	0.049529	0.459117	CHCHD6	coiled-coil-helix-coiled-coil-helix domain containing 6 [Source:HGNC Symbol;Acc:HGNC:28184]	protein_coding	coding	126704220	126960406	3	1	chromosome
ENSG00000165102	325.196	0.270406	0.138266	1.96209	0.0497525	0.459117	HGSNAT	heparan-alpha-glucosaminide N-acetyltransferase [Source:HGNC Symbol;Acc:HGNC:26527]	protein_coding	coding	43140455	43202855	8	1	chromosome
ENSG00000180953	22.5156	0.230033	0.117424	1.96254	0.0496993	0.459117	ST20	suppressor of tumorigenicity 20 [Source:HGNC Symbol;Acc:HGNC:33520]	protein_coding	coding	79898840	79923702	15	-1	chromosome
ENSG00000183207	836.118	-0.190608	0.0971923	-1.95952	0.0500519	0.459117	RUVBL2	RuvB like AAA ATPase 2 [Source:HGNC Symbol;Acc:HGNC:10475]	protein_coding	coding	48993448	49015995	19	1	chromosome
ENSG00000183474	624.744	-0.20695	0.105371	-1.96139	0.0498331	0.459117	GTF2H2C	GTF2H2 family member C [Source:HGNC Symbol;Acc:HGNC:31394]	protein_coding	coding	69560208	69594723	5	1	chromosome
ENSG00000184752	566.087	-0.185767	0.0946702	-1.96223	0.0497355	0.459117	NDUFA12	NADH:ubiquinone oxidoreductase subunit A12 [Source:HGNC Symbol;Acc:HGNC:23987]	protein_coding	coding	94897055	95003770	12	-1	chromosome
ENSG00000204389	1364.38	-0.144303	0.0736528	-1.95924	0.0500843	0.459117	HSPA1A	heat shock protein family A (Hsp70) member 1A [Source:HGNC Symbol;Acc:HGNC:5232]	protein_coding	coding	31815464	31817946	6	1	chromosome
ENSG00000239440	47.8625	-0.265376	0.135356	-1.9644	0.0494833	0.459117	LINC02008	long intergenic non-protein coding RNA 2008 [Source:HGNC Symbol;Acc:HGNC:52844]	lincRNA	noncoding	81986138	82463675	3	1	chromosome
ENSG00000141543	1673.97	-0.137933	0.0704323	-1.95808	0.0502203	0.459941	EIF4A3	eukaryotic translation initiation factor 4A3 [Source:HGNC Symbol;Acc:HGNC:18683]	protein_coding	coding	80135214	80147183	17	-1	chromosome
ENSG00000151239	1309.28	0.149676	0.0764707	1.95792	0.0502398	0.459941	TWF1	twinfilin actin binding protein 1 [Source:HGNC Symbol;Acc:HGNC:9620]	protein_coding	coding	43793723	43806375	12	-1	chromosome
ENSG00000072071	28.5394	-0.180306	0.0960805	-1.95608	0.050456	0.461618	ADGRL1	adhesion G protein-coupled receptor L1 [Source:HGNC Symbol;Acc:HGNC:20973]	protein_coding	coding	14147743	14206187	19	-1	chromosome
ENSG00000113522	993.478	0.155567	0.0795657	1.95555	0.0505179	0.461883	RAD50	RAD50 double strand break repair protein [Source:HGNC Symbol;Acc:HGNC:9816]	protein_coding	coding	132556019	132646344	5	1	chromosome
ENSG00000102098	163.156	0.269749	0.138752	1.95359	0.0507502	0.461963	SCML2	sex comb on midleg like 2 (Drosophila) [Source:HGNC Symbol;Acc:HGNC:10581]	protein_coding	coding	18239314	18354727	X	-1	chromosome
ENSG00000137337	660.3	-0.246154	0.126145	-1.95353	0.0507564	0.461963	MDC1	mediator of DNA damage checkpoint 1 [Source:HGNC Symbol;Acc:HGNC:21163]	protein_coding	coding	30699807	30717889	6	-1	chromosome
ENSG00000153147	1677.34	-0.194513	0.099449	-1.95487	0.0505978	0.461963	SMARCA5	SWI/SNF related, matrix associated, actin dependent regulator of chromatin, subfamily a, member 5 [Source:HGNC Symbol;Acc:HGNC:11101]	protein_coding	coding	143513463	143557486	4	1	chromosome
ENSG00000157823	347.226	-0.241028	0.123339	-1.95453	0.0506383	0.461963	AP3S2	adaptor related protein complex 3 sigma 2 subunit [Source:HGNC Symbol;Acc:HGNC:571]	protein_coding	coding	89830599	89894638	15	-1	chromosome
ENSG00000166333	734.275	-0.191287	0.0978355	-1.95341	0.0507711	0.461963	ILK	integrin linked kinase [Source:HGNC Symbol;Acc:HGNC:6040]	protein_coding	coding	6603708	6610874	11	1	chromosome
ENSG00000186104	26.6425	0.185504	0.0981906	1.95352	0.050758	0.461963	CYP2R1	cytochrome P450 family 2 subfamily R member 1 [Source:HGNC Symbol;Acc:HGNC:20580]	protein_coding	coding	14877440	14892252	11	-1	chromosome
ENSG00000245532	2033.1	-0.170865	0.0874323	-1.9542	0.0506771	0.461963	NEAT1	nuclear paraspeckle assembly transcript 1 (non-protein coding) [Source:HGNC Symbol;Acc:HGNC:30815]	lincRNA	noncoding	65422774	65445540	11	1	chromosome
ENSG00000248643	33.2864	-0.17085	0.0904577	-1.95325	0.0507906	0.461963	RBM14-RBM4	RBM14-RBM4 readthrough [Source:HGNC Symbol;Acc:HGNC:38840]	protein_coding	coding	66616626	66646469	11	1	chromosome
ENSG00000103342	5101.35	0.120588	0.0617478	1.9529	0.0508311	0.462032	GSPT1	G1 to S phase transition 1 [Source:HGNC Symbol;Acc:HGNC:4621]	protein_coding	coding	11868128	11916082	16	-1	chromosome
ENSG00000172201	37.5158	0.253603	0.12965	1.95259	0.0508679	0.462067	ID4	inhibitor of DNA binding 4, HLH protein [Source:HGNC Symbol;Acc:HGNC:5363]	protein_coding	coding	19837386	19840684	6	1	chromosome
ENSG00000001629	628.111	0.256574	0.131711	1.95171	0.0509729	0.462542	ANKIB1	ankyrin repeat and IBR domain containing 1 [Source:HGNC Symbol;Acc:HGNC:22215]	protein_coding	coding	92246234	92401384	7	1	chromosome
ENSG00000270647	2133.86	-0.15583	0.0798605	-1.9516	0.0509863	0.462542	TAF15	TATA-box binding protein associated factor 15 [Source:HGNC Symbol;Acc:HGNC:11547]	protein_coding	coding	35713791	35864615	17	1	chromosome
ENSG00000159399	1672.49	-0.156134	0.0799881	-1.95124	0.0510284	0.462625	HK2	hexokinase 2 [Source:HGNC Symbol;Acc:HGNC:4923]	protein_coding	coding	74833981	74893359	2	1	chromosome
ENSG00000061794	1275.56	0.160881	0.0825012	1.94988	0.0511901	0.463398	MRPS35	mitochondrial ribosomal protein S35 [Source:HGNC Symbol;Acc:HGNC:16635]	protein_coding	coding	27710773	27756295	12	1	chromosome
ENSG00000078674	2511.39	0.163932	0.0841048	1.94941	0.0512469	0.463398	PCM1	pericentriolar material 1 [Source:HGNC Symbol;Acc:HGNC:8727]	protein_coding	coding	17922840	18029944	8	1	chromosome
ENSG00000108556	14.9285	0.135507	0.0762437	1.94968	0.0512148	0.463398	CHRNE	cholinergic receptor nicotinic epsilon subunit [Source:HGNC Symbol;Acc:HGNC:1966]	protein_coding	coding	4897774	4903074	17	-1	chromosome
ENSG00000143882	50.7441	0.178742	0.0962437	1.94914	0.0512792	0.463398	ATP6V1C2	ATPase H+ transporting V1 subunit C2 [Source:HGNC Symbol;Acc:HGNC:18264]	protein_coding	coding	10721649	10785110	2	1	chromosome
ENSG00000171160	77.547	-0.264617	0.134992	-1.95011	0.0511634	0.463398	MORN4	MORN repeat containing 4 [Source:HGNC Symbol;Acc:HGNC:24001]	protein_coding	coding	97614553	97633500	10	-1	chromosome
ENSG00000121057	2017	-0.162551	0.0834313	-1.948	0.0514151	0.463729	AKAP1	A-kinase anchoring protein 1 [Source:HGNC Symbol;Acc:HGNC:367]	protein_coding	coding	57085092	57121349	17	1	chromosome
ENSG00000131236	3191.13	-0.130431	0.066941	-1.94812	0.0514001	0.463729	CAP1	cyclase associated actin cytoskeleton regulatory protein 1 [Source:HGNC Symbol;Acc:HGNC:20040]	protein_coding	coding	40040233	40072649	1	1	chromosome
ENSG00000177000	144.127	0.269491	0.138601	1.94842	0.0513643	0.463729	MTHFR	methylenetetrahydrofolate reductase [Source:HGNC Symbol;Acc:HGNC:7436]	protein_coding	coding	11785723	11806920	1	-1	chromosome
ENSG00000075213	20.2984	0.117013	0.0679215	1.94727	0.0515018	0.464213	SEMA3A	semaphorin 3A [Source:HGNC Symbol;Acc:HGNC:10723]	protein_coding	coding	83955777	84492724	7	-1	chromosome
ENSG00000163319	429.713	-0.246502	0.126387	-1.94568	0.0516933	0.465639	MRPS18C	mitochondrial ribosomal protein S18C [Source:HGNC Symbol;Acc:HGNC:16633]	protein_coding	coding	83455932	83469735	4	1	chromosome
ENSG00000100479	216.164	-0.270477	0.138686	-1.94406	0.0518885	0.465859	POLE2	DNA polymerase epsilon 2, accessory subunit [Source:HGNC Symbol;Acc:HGNC:9178]	protein_coding	coding	49643555	49688422	14	-1	chromosome
ENSG00000162736	1565.52	0.197643	0.101706	1.94382	0.0519173	0.465859	NCSTN	nicastrin [Source:HGNC Symbol;Acc:HGNC:17091]	protein_coding	coding	160343272	160358952	1	1	chromosome
ENSG00000173762	332.057	-0.21135	0.108566	-1.9446	0.0518231	0.465859	CD7	CD7 molecule [Source:HGNC Symbol;Acc:HGNC:1695]	protein_coding	coding	82314868	82317602	17	-1	chromosome
ENSG00000181192	344.269	0.270211	0.139064	1.94401	0.0518947	0.465859	DHTKD1	dehydrogenase E1 and transketolase domain containing 1 [Source:HGNC Symbol;Acc:HGNC:23537]	protein_coding	coding	12068972	12123225	10	1	chromosome
ENSG00000188687	11.4841	0.144775	0.0796259	1.94393	0.0519039	0.465859	SLC4A5	solute carrier family 4 member 5 [Source:HGNC Symbol;Acc:HGNC:18168]	protein_coding	coding	74216242	74343414	2	-1	chromosome
ENSG00000197785	636.164	-0.213721	0.10978	-1.9442	0.0518709	0.465859	ATAD3A	ATPase family, AAA domain containing 3A [Source:HGNC Symbol;Acc:HGNC:25567]	protein_coding	coding	1512151	1534687	1	1	chromosome
ENSG00000080947	32.9202	-0.237577	0.124934	-1.94323	0.0519889	0.466085	CROCCP3	ciliary rootlet coiled-coil, rootletin pseudogene 3 [Source:HGNC Symbol;Acc:HGNC:29405]	transcribed_unprocessed_pseudogene	pseudo	16467436	16499257	1	-1	chromosome
ENSG00000214517	554.59	-0.215386	0.110726	-1.94306	0.0520091	0.466085	PPME1	protein phosphatase methylesterase 1 [Source:HGNC Symbol;Acc:HGNC:30178]	protein_coding	coding	74171099	74254703	11	1	chromosome
ENSG00000159873	871.673	0.163613	0.0842646	1.94229	0.0521019	0.466618	CCDC117	coiled-coil domain containing 117 [Source:HGNC Symbol;Acc:HGNC:26599]	protein_coding	coding	28772674	28789301	22	1	chromosome
ENSG00000103426	12.1231	0.0160759	0.0206582	1.94055	0.0523127	0.467577	CORO7-PAM16	CORO7-PAM16 readthrough [Source:HGNC Symbol;Acc:HGNC:44424]	protein_coding	coding	4340251	4420494	16	-1	chromosome
ENSG00000138073	1086.3	-0.157144	0.0809273	-1.94089	0.0522716	0.467577	PREB	prolactin regulatory element binding [Source:HGNC Symbol;Acc:HGNC:9356]	protein_coding	coding	27130756	27134675	2	-1	chromosome
ENSG00000159023	1372.94	0.214214	0.110367	1.94031	0.0523424	0.467577	EPB41	erythrocyte membrane protein band 4.1 [Source:HGNC Symbol;Acc:HGNC:3377]	protein_coding	coding	28887091	29120046	1	1	chromosome
ENSG00000234431	13.1813	0.132342	0.0742085	1.94033	0.05234	0.467577	AC007283.1	NA	3prime_overlapping_ncRNA	other	201166965	201167546	2	1	chromosome
ENSG00000171823	56.4598	-0.266355	0.136656	-1.93936	0.0524575	0.468196	FBXL14	F-box and leucine rich repeat protein 14 [Source:HGNC Symbol;Acc:HGNC:28624]	protein_coding	coding	1565993	1594165	12	-1	chromosome
ENSG00000231784	15.3564	0.100271	0.0601674	1.93919	0.0524786	0.468196	DBIL5P	diazepam binding inhibitor-like 5, pseudogene [Source:HGNC Symbol;Acc:HGNC:38519]	transcribed_unitary_pseudogene	pseudo	752660	755336	17	1	chromosome
ENSG00000080608	743.982	0.214039	0.110511	1.93881	0.0525245	0.468307	PUM3	pumilio RNA binding family member 3 [Source:HGNC Symbol;Acc:HGNC:29676]	protein_coding	coding	2720469	2844241	9	-1	chromosome
ENSG00000169733	576.675	-0.230855	0.118928	-1.93818	0.0526015	0.468695	RFNG	RFNG O-fucosylpeptide 3-beta-N-acetylglucosaminyltransferase [Source:HGNC Symbol;Acc:HGNC:9974]	protein_coding	coding	82047902	82051831	17	-1	chromosome
ENSG00000103222	1151.33	-0.160857	0.0830538	-1.93668	0.0527843	0.469055	ABCC1	ATP binding cassette subfamily C member 1 [Source:HGNC Symbol;Acc:HGNC:51]	protein_coding	coding	15949577	16143074	16	1	chromosome
ENSG00000108651	776.726	0.193495	0.0999533	1.93566	0.0529093	0.469055	UTP6	UTP6, small subunit processome component [Source:HGNC Symbol;Acc:HGNC:18279]	protein_coding	coding	31860899	31901765	17	-1	chromosome
ENSG00000164808	313.659	-0.247107	0.127733	-1.93592	0.0528781	0.469055	SPIDR	scaffolding protein involved in DNA repair [Source:HGNC Symbol;Acc:HGNC:28971]	protein_coding	coding	47260575	47736306	8	1	chromosome
ENSG00000179361	247.913	0.246959	0.127646	1.93566	0.0529097	0.469055	ARID3B	AT-rich interaction domain 3B [Source:HGNC Symbol;Acc:HGNC:14350]	protein_coding	coding	74541177	74598131	15	1	chromosome
ENSG00000180769	23.7784	0.155952	0.0857884	1.93723	0.0527173	0.469055	WDFY3-AS2	WDFY3 antisense RNA 2 [Source:HGNC Symbol;Acc:HGNC:21603]	processed_transcript	other	84965682	85011277	4	1	chromosome
ENSG00000228716	1950.8	0.211829	0.109502	1.93571	0.0529034	0.469055	DHFR	dihydrofolate reductase [Source:HGNC Symbol;Acc:HGNC:2861]	protein_coding	coding	80626228	80654983	5	-1	chromosome
ENSG00000242715	16.1015	0.178416	0.0960563	1.93671	0.052781	0.469055	CCDC169	coiled-coil domain containing 169 [Source:HGNC Symbol;Acc:HGNC:34361]	protein_coding	coding	36222008	36297840	13	-1	chromosome
ENSG00000274049	11.9388	0.0160752	0.020658	1.93731	0.052708	0.469055	INO80B-WBP1	INO80B-WBP1 readthrough (NMD candidate) [Source:HGNC Symbol;Acc:HGNC:49199]	protein_coding	coding	74455088	74460884	2	1	chromosome
ENSG00000147437	25.8606	0.193841	0.103874	1.93488	0.0530051	0.469306	GNRH1	gonadotropin releasing hormone 1 [Source:HGNC Symbol;Acc:HGNC:4419]	protein_coding	coding	25419260	25424654	8	-1	chromosome
ENSG00000224470	792.552	-0.174407	0.0900929	-1.935	0.0529908	0.469306	ATXN1L	ataxin 1 like [Source:HGNC Symbol;Acc:HGNC:33279]	protein_coding	coding	71845991	71885268	16	1	chromosome
ENSG00000149273	10922.4	-0.130054	0.0672445	-1.93391	0.0531245	0.469769	RPS3	ribosomal protein S3 [Source:HGNC Symbol;Acc:HGNC:10420]	protein_coding	coding	75399486	75422280	11	1	chromosome
ENSG00000204231	484.953	-0.221423	0.114412	-1.93397	0.0531168	0.469769	RXRB	retinoid X receptor beta [Source:HGNC Symbol;Acc:HGNC:10478]	protein_coding	coding	33193588	33200688	6	-1	chromosome
ENSG00000068120	1310.83	-0.153945	0.0795793	-1.93363	0.0531592	0.46978	COASY	Coenzyme A synthase [Source:HGNC Symbol;Acc:HGNC:29932]	protein_coding	coding	42561467	42566277	17	1	chromosome
ENSG00000181090	465.823	-0.233477	0.120659	-1.93274	0.0532686	0.47045	EHMT1	euchromatic histone lysine methyltransferase 1 [Source:HGNC Symbol;Acc:HGNC:24650]	protein_coding	coding	137618963	137870016	9	1	chromosome
ENSG00000137285	154.929	-0.263074	0.135835	-1.93204	0.053355	0.470619	TUBB2B	tubulin beta 2B class IIb [Source:HGNC Symbol;Acc:HGNC:30829]	protein_coding	coding	3224261	3231730	6	-1	chromosome
ENSG00000183458	567.348	-0.218428	0.113139	-1.93205	0.0533539	0.470619	AC138932.1	NA	transcribed_unprocessed_pseudogene	pseudo	14911551	14935708	16	1	chromosome
ENSG00000183873	11.7999	0.0160739	0.020656	1.93161	0.0534083	0.470793	SCN5A	sodium voltage-gated channel alpha subunit 5 [Source:HGNC Symbol;Acc:HGNC:10593]	protein_coding	coding	38548057	38649673	3	-1	chromosome
ENSG00000081692	201.648	-0.249161	0.129041	-1.93008	0.0535969	0.471952	JMJD4	jumonji domain containing 4 [Source:HGNC Symbol;Acc:HGNC:25724]	protein_coding	coding	227730425	227735411	1	-1	chromosome
ENSG00000106615	718.647	0.187313	0.0970605	1.92981	0.0536304	0.471952	RHEB	Ras homolog enriched in brain [Source:HGNC Symbol;Acc:HGNC:10011]	protein_coding	coding	151466012	151520120	7	-1	chromosome
ENSG00000269858	362.383	-0.242928	0.125588	-1.92973	0.0536408	0.471952	EGLN2	egl-9 family hypoxia inducible factor 2 [Source:HGNC Symbol;Acc:HGNC:14660]	protein_coding	coding	40798996	40808433	19	1	chromosome
ENSG00000088387	77.7756	0.20645	0.110258	1.92891	0.0537416	0.472176	DOCK9	dedicator of cytokinesis 9 [Source:HGNC Symbol;Acc:HGNC:14132]	protein_coding	coding	98793429	99086625	13	-1	chromosome
ENSG00000146776	124.585	0.255367	0.132769	1.92925	0.0537002	0.472176	ATXN7L1	ataxin 7 like 1 [Source:HGNC Symbol;Acc:HGNC:22210]	protein_coding	coding	105605067	105876604	7	-1	chromosome
ENSG00000265298	18.9459	-0.200577	0.104652	-1.92871	0.0537674	0.472176	AC132812.1	NA	unprocessed_pseudogene	pseudo	64750420	64751311	17	1	chromosome
ENSG00000151806	847.1	0.236349	0.122799	1.92754	0.0539129	0.473157	GUF1	GUF1 homolog, GTPase [Source:HGNC Symbol;Acc:HGNC:25799]	protein_coding	coding	44678427	44700926	4	1	chromosome
ENSG00000072571	833.469	0.214096	0.11128	1.92579	0.0541309	0.474476	HMMR	hyaluronan mediated motility receptor [Source:HGNC Symbol;Acc:HGNC:5012]	protein_coding	coding	163460203	163491945	5	1	chromosome
ENSG00000139428	447.762	-0.206735	0.107361	-1.92581	0.0541275	0.474476	MMAB	methylmalonic aciduria (cobalamin deficiency) cblB type [Source:HGNC Symbol;Acc:HGNC:19331]	protein_coding	coding	109553737	109573874	12	-1	chromosome
ENSG00000138085	1067.94	-0.18536	0.0961936	-1.92541	0.0541777	0.474588	ATRAID	all-trans retinoic acid induced differentiation factor [Source:HGNC Symbol;Acc:HGNC:24090]	protein_coding	coding	27212027	27217178	2	1	chromosome
ENSG00000130675	62.9422	-0.260685	0.136089	-1.92465	0.0542736	0.474598	MNX1	motor neuron and pancreas homeobox 1 [Source:HGNC Symbol;Acc:HGNC:4979]	protein_coding	coding	156994051	157010651	7	-1	chromosome
ENSG00000142676	10557.6	0.125172	0.0650367	1.92459	0.0542805	0.474598	RPL11	ribosomal protein L11 [Source:HGNC Symbol;Acc:HGNC:10301]	protein_coding	coding	23691779	23696425	1	1	chromosome
ENSG00000166024	190.11	0.244128	0.127081	1.925	0.0542293	0.474598	R3HCC1L	R3H domain and coiled-coil containing 1 like [Source:HGNC Symbol;Acc:HGNC:23512]	protein_coding	coding	98134624	98244897	10	1	chromosome
ENSG00000164818	440.644	-0.215294	0.111719	-1.9239	0.0543669	0.475057	DNAAF5	dynein axonemal assembly factor 5 [Source:HGNC Symbol;Acc:HGNC:26013]	protein_coding	coding	726701	786475	7	1	chromosome
ENSG00000185947	374.904	0.254582	0.132792	1.92297	0.0544833	0.475777	ZNF267	zinc finger protein 267 [Source:HGNC Symbol;Acc:HGNC:13060]	protein_coding	coding	31873758	31917357	16	1	chromosome
ENSG00000153561	1307.05	0.189654	0.0986815	1.92168	0.0546462	0.476903	RMND5A	required for meiotic nuclear division 5 homolog A [Source:HGNC Symbol;Acc:HGNC:25850]	protein_coding	coding	86720173	86778041	2	1	chromosome
ENSG00000081087	331.538	0.249056	0.129986	1.92082	0.054755	0.477319	OSTM1	osteopetrosis associated transmembrane protein 1 [Source:HGNC Symbol;Acc:HGNC:21652]	protein_coding	coding	108041409	108165854	6	-1	chromosome
ENSG00000178209	1046.6	-0.217296	0.113062	-1.92076	0.054762	0.477319	PLEC	plectin [Source:HGNC Symbol;Acc:HGNC:9069]	protein_coding	coding	143915147	143976734	8	-1	chromosome
ENSG00000230565	13.9184	0.184978	0.0987852	1.92036	0.0548126	0.477462	ZNF32-AS2	ZNF32 antisense RNA 2 [Source:HGNC Symbol;Acc:HGNC:23593]	antisense_RNA	other	43645942	43648019	10	1	chromosome
ENSG00000154864	1393.93	0.159459	0.0830679	1.91955	0.0549152	0.478059	PIEZO2	piezo type mechanosensitive ion channel component 2 [Source:HGNC Symbol;Acc:HGNC:26270]	protein_coding	coding	10666483	11148762	18	-1	chromosome
ENSG00000089022	407.895	0.193774	0.101041	1.91844	0.0550547	0.478381	MAPKAPK5	mitogen-activated protein kinase-activated protein kinase 5 [Source:HGNC Symbol;Acc:HGNC:6889]	protein_coding	coding	111841978	111902238	12	1	chromosome
ENSG00000111859	1101.54	-0.142942	0.0744831	-1.91866	0.0550271	0.478381	NEDD9	neural precursor cell expressed, developmentally down-regulated 9 [Source:HGNC Symbol;Acc:HGNC:7733]	protein_coding	coding	11183298	11382348	6	-1	chromosome
ENSG00000249115	258.432	0.257342	0.134503	1.91879	0.0550107	0.478381	HAUS5	HAUS augmin like complex subunit 5 [Source:HGNC Symbol;Acc:HGNC:29130]	protein_coding	coding	35612744	35625349	19	1	chromosome
ENSG00000103160	901.467	-0.171482	0.0893951	-1.91771	0.0551481	0.478896	HSDL1	hydroxysteroid dehydrogenase like 1 [Source:HGNC Symbol;Acc:HGNC:16475]	protein_coding	coding	84122146	84145192	16	-1	chromosome
ENSG00000187997	18.3458	0.114992	0.0673697	1.91597	0.055369	0.480516	C17orf99	chromosome 17 open reading frame 99 [Source:HGNC Symbol;Acc:HGNC:34490]	protein_coding	coding	78146353	78166177	17	1	chromosome
ENSG00000204536	316.278	0.228139	0.119029	1.9157	0.0554039	0.480522	CCHCR1	coiled-coil alpha-helical rod protein 1 [Source:HGNC Symbol;Acc:HGNC:13930]	protein_coding	coding	31142439	31158238	6	-1	chromosome
ENSG00000013375	1710.16	-0.198448	0.103625	-1.91514	0.0554749	0.48084	PGM3	phosphoglucomutase 3 [Source:HGNC Symbol;Acc:HGNC:8907]	protein_coding	coding	83161150	83193936	6	-1	chromosome
ENSG00000256683	101.676	0.248078	0.129894	1.91404	0.0556146	0.481752	ZNF350	zinc finger protein 350 [Source:HGNC Symbol;Acc:HGNC:16656]	protein_coding	coding	51964343	51986856	19	-1	chromosome
ENSG00000132286	491.367	0.202119	0.105692	1.91315	0.055729	0.482147	TIMM10B	translocase of inner mitochondrial membrane 10B [Source:HGNC Symbol;Acc:HGNC:4022]	protein_coding	coding	6481447	6484679	11	1	chromosome
ENSG00000275052	1594	0.172047	0.0899663	1.9133	0.0557101	0.482147	PPP4R3B	protein phosphatase 4 regulatory subunit 3B [Source:HGNC Symbol;Acc:HGNC:29267]	protein_coding	coding	55547292	55618880	2	-1	chromosome
ENSG00000103507	327.066	-0.233284	0.121954	-1.91186	0.055894	0.482383	BCKDK	branched chain ketoacid dehydrogenase kinase [Source:HGNC Symbol;Acc:HGNC:16902]	protein_coding	coding	31106107	31112791	16	1	chromosome
ENSG00000110330	979.368	0.225722	0.11812	1.91255	0.0558051	0.482383	BIRC2	baculoviral IAP repeat containing 2 [Source:HGNC Symbol;Acc:HGNC:590]	protein_coding	coding	102347211	102378670	11	1	chromosome
ENSG00000133895	414.514	-0.209806	0.109611	-1.91197	0.0558805	0.482383	MEN1	menin 1 [Source:HGNC Symbol;Acc:HGNC:7010]	protein_coding	coding	64803510	64811294	11	-1	chromosome
ENSG00000170445	692.654	-0.222111	0.11598	-1.91195	0.0558827	0.482383	HARS	histidyl-tRNA synthetase [Source:HGNC Symbol;Acc:HGNC:4816]	protein_coding	coding	140673173	140692024	5	-1	chromosome
ENSG00000118200	344.524	-0.241458	0.126232	-1.9099	0.0561457	0.48288	CAMSAP2	calmodulin regulated spectrin associated protein family member 2 [Source:HGNC Symbol;Acc:HGNC:29188]	protein_coding	coding	200739558	200860704	1	1	chromosome
ENSG00000123643	163.203	-0.267203	0.139428	-1.91011	0.0561195	0.48288	SLC36A1	solute carrier family 36 member 1 [Source:HGNC Symbol;Acc:HGNC:18761]	protein_coding	coding	151437046	151492381	5	1	chromosome
ENSG00000132423	129.331	0.264438	0.139318	1.9098	0.0561585	0.48288	COQ3	coenzyme Q3, methyltransferase [Source:HGNC Symbol;Acc:HGNC:18175]	protein_coding	coding	99369400	99394204	6	-1	chromosome
ENSG00000163312	140.204	0.254908	0.133599	1.91045	0.0560752	0.48288	HELQ	helicase, POLQ like [Source:HGNC Symbol;Acc:HGNC:18536]	protein_coding	coding	83407343	83455856	4	-1	chromosome
ENSG00000177885	1944.16	0.149093	0.0780578	1.91041	0.056081	0.48288	GRB2	growth factor receptor bound protein 2 [Source:HGNC Symbol;Acc:HGNC:4566]	protein_coding	coding	75318076	75405709	17	-1	chromosome
ENSG00000185650	687.415	-0.232874	0.121807	-1.90981	0.0561579	0.48288	ZFP36L1	ZFP36 ring finger protein like 1 [Source:HGNC Symbol;Acc:HGNC:1107]	protein_coding	coding	68787660	68796253	14	-1	chromosome
ENSG00000177058	267.004	0.247154	0.129779	1.90945	0.0562035	0.482971	SLC38A9	solute carrier family 38 member 9 [Source:HGNC Symbol;Acc:HGNC:26907]	protein_coding	coding	55625845	55773194	5	-1	chromosome
ENSG00000104870	1098.29	0.142047	0.0744683	1.90756	0.0564479	0.483292	FCGRT	Fc fragment of IgG receptor and transporter [Source:HGNC Symbol;Acc:HGNC:3621]	protein_coding	coding	49506816	49526333	19	1	chromosome
ENSG00000111203	114.715	-0.261857	0.136326	-1.90763	0.0564384	0.483292	ITFG2	integrin alpha FG-GAP repeat containing 2 [Source:HGNC Symbol;Acc:HGNC:30879]	protein_coding	coding	2812622	2859791	12	1	chromosome
ENSG00000116717	440.388	0.194277	0.101849	1.90782	0.0564141	0.483292	GADD45A	growth arrest and DNA damage inducible alpha [Source:HGNC Symbol;Acc:HGNC:4095]	protein_coding	coding	67685061	67688338	1	1	chromosome
ENSG00000158747	175.261	-0.264503	0.138313	-1.90809	0.0563797	0.483292	NBL1	neuroblastoma 1, DAN family BMP antagonist [Source:HGNC Symbol;Acc:HGNC:7650]	protein_coding	coding	19640554	19658456	1	1	chromosome
ENSG00000163611	168.282	-0.260343	0.136465	-1.90857	0.0563173	0.483292	SPICE1	spindle and centriole associated protein 1 [Source:HGNC Symbol;Acc:HGNC:25083]	protein_coding	coding	113442718	113515187	3	-1	chromosome
ENSG00000164615	243.222	0.230698	0.120834	1.90857	0.0563172	0.483292	CAMLG	calcium modulating ligand [Source:HGNC Symbol;Acc:HGNC:1471]	protein_coding	coding	134738501	134752160	5	1	chromosome
ENSG00000039123	1177.1	0.204179	0.107228	1.90506	0.0567723	0.484589	SKIV2L2	Ski2 like RNA helicase 2 [Source:HGNC Symbol;Acc:HGNC:18734]	protein_coding	coding	55307760	55425581	5	1	chromosome
ENSG00000137171	477.62	-0.213552	0.112022	-1.90565	0.0566953	0.484589	KLC4	kinesin light chain 4 [Source:HGNC Symbol;Acc:HGNC:21624]	protein_coding	coding	43040777	43075099	6	1	chromosome
ENSG00000157379	554.804	-0.177858	0.0933286	-1.90542	0.0567255	0.484589	DHRS1	dehydrogenase/reductase 1 [Source:HGNC Symbol;Acc:HGNC:16445]	protein_coding	coding	24290598	24299833	14	-1	chromosome
ENSG00000168066	1611.9	-0.188581	0.0989746	-1.9051	0.0567669	0.484589	SF1	splicing factor 1 [Source:HGNC Symbol;Acc:HGNC:12950]	protein_coding	coding	64764606	64778786	11	-1	chromosome
ENSG00000174444	17511.9	-0.0960585	0.0503979	-1.90596	0.0566557	0.484589	RPL4	ribosomal protein L4 [Source:HGNC Symbol;Acc:HGNC:10353]	protein_coding	coding	66498015	66524532	15	-1	chromosome
ENSG00000255529	402.711	0.231253	0.121595	1.90465	0.056825	0.484743	POLR2M	RNA polymerase II subunit M [Source:HGNC Symbol;Acc:HGNC:14862]	protein_coding	coding	57706629	57782762	15	1	chromosome
ENSG00000153048	1658.21	-0.164657	0.0864537	-1.90388	0.0569259	0.485308	CARHSP1	calcium regulated heat stable protein 1 [Source:HGNC Symbol;Acc:HGNC:17150]	protein_coding	coding	8852942	8869012	16	-1	chromosome
ENSG00000105829	382.848	0.218823	0.11508	1.9033	0.0570018	0.485659	BET1	Bet1 golgi vesicular membrane trafficking protein [Source:HGNC Symbol;Acc:HGNC:14562]	protein_coding	coding	93962762	94004382	7	-1	chromosome
ENSG00000163636	965.515	0.155034	0.0815018	1.90293	0.0570496	0.485771	PSMD6	proteasome 26S subunit, non-ATPase 6 [Source:HGNC Symbol;Acc:HGNC:9564]	protein_coding	coding	64010549	64024010	3	-1	chromosome
ENSG00000188153	1107.49	0.22017	0.115755	1.90247	0.0571092	0.485984	COL4A5	collagen type IV alpha 5 chain [Source:HGNC Symbol;Acc:HGNC:2207]	protein_coding	coding	108439844	108697545	X	1	chromosome
ENSG00000164463	86.8269	-0.264185	0.139414	-1.90176	0.0572021	0.486479	CREBRF	CREB3 regulatory factor [Source:HGNC Symbol;Acc:HGNC:24050]	protein_coding	coding	173056352	173139284	5	1	chromosome
ENSG00000074657	19.0014	0.0910927	0.0572447	1.90117	0.0572794	0.48684	ZNF532	zinc finger protein 532 [Source:HGNC Symbol;Acc:HGNC:30940]	protein_coding	coding	58862600	58986480	18	1	chromosome
ENSG00000067445	185.17	0.242386	0.12785	1.89723	0.0577981	0.48723	TRO	trophinin [Source:HGNC Symbol;Acc:HGNC:12326]	protein_coding	coding	54920462	54931431	X	1	chromosome
ENSG00000070047	555.654	0.177244	0.0935036	1.89571	0.0579989	0.48723	PHRF1	PHD and ring finger domains 1 [Source:HGNC Symbol;Acc:HGNC:24351]	protein_coding	coding	576486	612222	11	1	chromosome
ENSG00000100697	1604.64	0.239442	0.126346	1.89707	0.0578184	0.48723	DICER1	dicer 1, ribonuclease III [Source:HGNC Symbol;Acc:HGNC:17098]	protein_coding	coding	95086228	95158010	14	-1	chromosome
ENSG00000101493	370.809	-0.260661	0.137933	-1.89494	0.0581003	0.48723	ZNF516	zinc finger protein 516 [Source:HGNC Symbol;Acc:HGNC:28990]	protein_coding	coding	76358190	76495190	18	-1	chromosome
ENSG00000102048	134.976	0.257514	0.136072	1.89551	0.0580247	0.48723	ASB9	ankyrin repeat and SOCS box containing 9 [Source:HGNC Symbol;Acc:HGNC:17184]	protein_coding	coding	15235288	15270467	X	-1	chromosome
ENSG00000109320	669.031	-0.168003	0.0884045	-1.89965	0.0574789	0.48723	NFKB1	nuclear factor kappa B subunit 1 [Source:HGNC Symbol;Acc:HGNC:7794]	protein_coding	coding	102501329	102617302	4	1	chromosome
ENSG00000112486	114.714	-0.253304	0.132641	-1.89922	0.057535	0.48723	CCR6	C-C motif chemokine receptor 6 [Source:HGNC Symbol;Acc:HGNC:1607]	protein_coding	coding	167111807	167139696	6	1	chromosome
ENSG00000113638	175.124	0.262169	0.138752	1.89828	0.0576587	0.48723	TTC33	tetratricopeptide repeat domain 33 [Source:HGNC Symbol;Acc:HGNC:29959]	protein_coding	coding	40512333	40755975	5	-1	chromosome
ENSG00000116128	183.614	0.264455	0.13941	1.89774	0.0577309	0.48723	BCL9	B-cell CLL/lymphoma 9 [Source:HGNC Symbol;Acc:HGNC:1008]	protein_coding	coding	147541412	147626216	1	1	chromosome
ENSG00000123144	1159.64	0.144959	0.0762907	1.90034	0.0573885	0.48723	TRIR	telomerase RNA component interacting RNase [Source:HGNC Symbol;Acc:HGNC:28424]	protein_coding	coding	12730640	12734775	19	-1	chromosome
ENSG00000139645	771.518	-0.174233	0.0918592	-1.89658	0.057883	0.48723	ANKRD52	ankyrin repeat domain 52 [Source:HGNC Symbol;Acc:HGNC:26614]	protein_coding	coding	56237807	56258391	12	-1	chromosome
ENSG00000143862	66.666	0.214573	0.114894	1.89856	0.0576221	0.48723	ARL8A	ADP ribosylation factor like GTPase 8A [Source:HGNC Symbol;Acc:HGNC:25192]	protein_coding	coding	202133404	202144743	1	-1	chromosome
ENSG00000144278	148.58	0.264567	0.139426	1.8937	0.0582645	0.48723	GALNT13	polypeptide N-acetylgalactosaminyltransferase 13 [Source:HGNC Symbol;Acc:HGNC:23242]	protein_coding	coding	153871913	154453849	2	1	chromosome
ENSG00000145354	635.025	0.202396	0.106733	1.89666	0.0578734	0.48723	CISD2	CDGSH iron sulfur domain 2 [Source:HGNC Symbol;Acc:HGNC:24212]	protein_coding	coding	102868978	102889242	4	1	chromosome
ENSG00000153093	10.6487	0.0849433	0.0542489	1.89502	0.0580897	0.48723	ACOXL	acyl-CoA oxidase like [Source:HGNC Symbol;Acc:HGNC:25621]	protein_coding	coding	110732573	111118222	2	1	chromosome
ENSG00000154655	150.929	0.26018	0.137372	1.89444	0.0581662	0.48723	L3MBTL4	L3MBTL4, histone methyl-lysine binding protein [Source:HGNC Symbol;Acc:HGNC:26677]	protein_coding	coding	5954706	6415237	18	-1	chromosome
ENSG00000164024	1073.73	0.171583	0.0905858	1.89496	0.0580975	0.48723	METAP1	methionyl aminopeptidase 1 [Source:HGNC Symbol;Acc:HGNC:15789]	protein_coding	coding	98995620	99062813	4	1	chromosome
ENSG00000166987	238.178	0.262903	0.139435	1.89695	0.0578349	0.48723	MBD6	methyl-CpG binding domain protein 6 [Source:HGNC Symbol;Acc:HGNC:20445]	protein_coding	coding	57520710	57530148	12	1	chromosome
ENSG00000169018	629.191	0.189496	0.0998027	1.8999	0.0574469	0.48723	FEM1B	fem-1 homolog B [Source:HGNC Symbol;Acc:HGNC:3649]	protein_coding	coding	68277803	68295865	15	1	chromosome
ENSG00000173821	1430.8	-0.245149	0.128982	-1.89963	0.0574817	0.48723	RNF213	ring finger protein 213 [Source:HGNC Symbol;Acc:HGNC:14539]	protein_coding	coding	80260866	80398786	17	1	chromosome
ENSG00000175581	297.927	0.244849	0.129462	1.89372	0.0582622	0.48723	MRPL48	mitochondrial ribosomal protein L48 [Source:HGNC Symbol;Acc:HGNC:16653]	protein_coding	coding	73787316	73865133	11	1	chromosome
ENSG00000181396	479.98	-0.212019	0.111749	-1.89838	0.0576459	0.48723	OGFOD3	2-oxoglutarate and iron dependent oxygenase domain containing 3 [Source:HGNC Symbol;Acc:HGNC:26174]	protein_coding	coding	82389223	82418637	17	-1	chromosome
ENSG00000204272	22.0728	-0.219776	0.117743	-1.89447	0.0581621	0.48723	NBDY	negative regulator of P-body association [Source:HGNC Symbol;Acc:HGNC:50713]	protein_coding	coding	56729241	56818380	X	1	chromosome
ENSG00000213625	1069.09	0.245832	0.129811	1.8964	0.0579075	0.48723	LEPROT	leptin receptor overlapping transcript [Source:HGNC Symbol;Acc:HGNC:29477]	protein_coding	coding	65420587	65436007	1	1	chromosome
ENSG00000237037	31.3843	0.229047	0.121838	1.89508	0.0580822	0.48723	NDUFA6-AS1	NDUFA6 antisense RNA 1 (head to head) [Source:HGNC Symbol;Acc:HGNC:45273]	processed_transcript	other	42090931	42137742	22	1	chromosome
ENSG00000251474	202.047	0.261341	0.138842	1.89528	0.0580553	0.48723	RPL32P3	ribosomal protein L32 pseudogene 3 [Source:HGNC Symbol;Acc:HGNC:27024]	transcribed_unprocessed_pseudogene	pseudo	129382922	129399655	3	-1	chromosome
ENSG00000278965	15.1602	0.116892	0.0674744	1.89386	0.0582434	0.48723	AC122713.2	NA	TEC	other	180078357	180081691	5	-1	chromosome
ENSG00000162076	100.175	0.263052	0.139175	1.89282	0.0583812	0.487624	FLYWCH2	FLYWCH family member 2 [Source:HGNC Symbol;Acc:HGNC:25178]	protein_coding	coding	2883186	2899382	16	1	chromosome
ENSG00000224057	75.9946	-0.261346	0.138602	-1.89286	0.0583762	0.487624	EGFR-AS1	EGFR antisense RNA 1 [Source:HGNC Symbol;Acc:HGNC:40207]	antisense_RNA	other	55179750	55188934	7	-1	chromosome
ENSG00000138180	402.543	0.219368	0.11617	1.8916	0.0585442	0.487822	CEP55	centrosomal protein 55 [Source:HGNC Symbol;Acc:HGNC:1161]	protein_coding	coding	93496632	93529092	10	1	chromosome
ENSG00000170456	522.193	-0.206861	0.109316	-1.89196	0.0584961	0.487822	DENND5B	DENN domain containing 5B [Source:HGNC Symbol;Acc:HGNC:28338]	protein_coding	coding	31382223	31591097	12	-1	chromosome
ENSG00000185787	4131.94	0.174701	0.0923468	1.89206	0.0584828	0.487822	MORF4L1	mortality factor 4 like 1 [Source:HGNC Symbol;Acc:HGNC:16989]	protein_coding	coding	78810487	78898133	15	1	chromosome
ENSG00000198586	979.745	0.246508	0.1302	1.89162	0.0585413	0.487822	TLK1	tousled like kinase 1 [Source:HGNC Symbol;Acc:HGNC:11841]	protein_coding	coding	170990823	171231314	2	-1	chromosome
ENSG00000139726	1256.13	0.140827	0.0744657	1.8913	0.0585845	0.487868	DENR	density regulated re-initiation and release factor [Source:HGNC Symbol;Acc:HGNC:2769]	protein_coding	coding	122752774	122771064	12	1	chromosome
ENSG00000184840	2434.19	-0.148553	0.0785352	-1.89097	0.0586282	0.487941	TMED9	transmembrane p24 trafficking protein 9 [Source:HGNC Symbol;Acc:HGNC:24878]	protein_coding	coding	177592158	177596124	5	1	chromosome
ENSG00000144455	380.993	0.204782	0.108368	1.89038	0.0587076	0.488312	SUMF1	sulfatase modifying factor 1 [Source:HGNC Symbol;Acc:HGNC:20376]	protein_coding	coding	3700814	4467281	3	-1	chromosome
ENSG00000198838	15.0354	-0.152666	0.0841641	-1.8892	0.0588648	0.489329	RYR3	ryanodine receptor 3 [Source:HGNC Symbol;Acc:HGNC:10485]	protein_coding	coding	33310945	33866121	15	1	chromosome
ENSG00000151474	17.4719	0.139502	0.079731	1.88811	0.0590115	0.490258	FRMD4A	FERM domain containing 4A [Source:HGNC Symbol;Acc:HGNC:25491]	protein_coding	coding	13643706	14462142	10	-1	chromosome
ENSG00000091592	39.0881	0.218444	0.116181	1.88757	0.0590834	0.490564	NLRP1	NLR family pyrin domain containing 1 [Source:HGNC Symbol;Acc:HGNC:14374]	protein_coding	coding	5499427	5619424	17	-1	chromosome
ENSG00000196159	26.7417	-0.190242	0.102025	-1.8873	0.0591204	0.49058	FAT4	FAT atypical cadherin 4 [Source:HGNC Symbol;Acc:HGNC:23109]	protein_coding	coding	125316399	125492932	4	1	chromosome
ENSG00000114423	185.689	0.249674	0.132561	1.88675	0.0591946	0.490615	CBLB	Cbl proto-oncogene B [Source:HGNC Symbol;Acc:HGNC:1542]	protein_coding	coding	105655461	105869552	3	-1	chromosome
ENSG00000274422	85.8011	-0.261991	0.139384	-1.88678	0.0591895	0.490615	AC245060.5	NA	lincRNA	noncoding	22283928	22287220	22	-1	chromosome
ENSG00000101444	5032.75	-0.145733	0.0772473	-1.88625	0.0592612	0.490876	AHCY	adenosylhomocysteinase [Source:HGNC Symbol;Acc:HGNC:343]	protein_coding	coding	34280268	34311802	20	-1	chromosome
ENSG00000134986	934.275	0.192441	0.102137	1.8854	0.0593765	0.491541	NREP	neuronal regeneration related protein [Source:HGNC Symbol;Acc:HGNC:16834]	protein_coding	coding	111662621	111997464	5	-1	chromosome
ENSG00000109846	11.1309	0.164934	0.0895567	1.88469	0.0594715	0.492036	CRYAB	crystallin alpha B [Source:HGNC Symbol;Acc:HGNC:2389]	protein_coding	coding	111908565	111923722	11	-1	chromosome
ENSG00000076662	125.021	-0.263404	0.139352	-1.88358	0.0596216	0.492696	ICAM3	intercellular adhesion molecule 3 [Source:HGNC Symbol;Acc:HGNC:5346]	protein_coding	coding	10333776	10339823	19	-1	chromosome
ENSG00000166762	19.4669	0.199892	0.108528	1.88368	0.0596088	0.492696	CATSPER2	cation channel sperm associated 2 [Source:HGNC Symbol;Acc:HGNC:18810]	protein_coding	coding	43628503	43668118	15	-1	chromosome
ENSG00000066923	105.956	0.215224	0.116633	1.88284	0.0597219	0.493217	STAG3	stromal antigen 3 [Source:HGNC Symbol;Acc:HGNC:11356]	protein_coding	coding	100177563	100221488	7	1	chromosome
ENSG00000185000	787.221	-0.224014	0.119115	-1.8826	0.059755	0.493217	DGAT1	diacylglycerol O-acyltransferase 1 [Source:HGNC Symbol;Acc:HGNC:2843]	protein_coding	coding	144314584	144326910	8	-1	chromosome
ENSG00000048707	545	0.210004	0.111774	1.88066	0.0600188	0.494646	VPS13D	vacuolar protein sorting 13 homolog D [Source:HGNC Symbol;Acc:HGNC:23595]	protein_coding	coding	12230067	12512047	1	1	chromosome
ENSG00000151491	1178.52	-0.146924	0.0780934	-1.88104	0.0599662	0.494646	EPS8	epidermal growth factor receptor pathway substrate 8 [Source:HGNC Symbol;Acc:HGNC:3420]	protein_coding	coding	15620158	15882329	12	-1	chromosome
ENSG00000204176	102.765	0.256331	0.136639	1.88054	0.0600341	0.494646	SYT15	synaptotagmin 15 [Source:HGNC Symbol;Acc:HGNC:17167]	protein_coding	coding	46578217	46594173	10	1	chromosome
ENSG00000113971	237.524	0.232944	0.123974	1.87999	0.0601099	0.494979	NPHP3	nephrocystin 3 [Source:HGNC Symbol;Acc:HGNC:7907]	protein_coding	coding	132680609	132722442	3	-1	chromosome
ENSG00000186301	1349.31	-0.188104	0.100061	-1.87973	0.0601454	0.49498	MST1P2	macrophage stimulating 1 pseudogene 2 [Source:HGNC Symbol;Acc:HGNC:7383]	unprocessed_pseudogene	pseudo	16645622	16650289	1	1	chromosome
ENSG00000133863	77.1265	-0.244376	0.131096	-1.87911	0.0602294	0.495381	TEX15	testis expressed 15, meiosis and synapsis associated [Source:HGNC Symbol;Acc:HGNC:11738]	protein_coding	coding	30831544	30890606	8	-1	chromosome
ENSG00000137492	872.302	0.17864	0.0951213	1.87878	0.060275	0.495465	THAP12	THAP domain containing 12 [Source:HGNC Symbol;Acc:HGNC:9440]	protein_coding	coding	76349956	76380971	11	-1	chromosome
ENSG00000270977	13.0832	0.0939863	0.0581665	1.87836	0.060332	0.495642	AC015849.5	NA	lincRNA	noncoding	35893707	35911023	17	-1	chromosome
ENSG00000101350	1020.43	-0.154098	0.0820579	-1.87718	0.0604938	0.49646	KIF3B	kinesin family member 3B [Source:HGNC Symbol;Acc:HGNC:6320]	protein_coding	coding	32277664	32335011	20	1	chromosome
ENSG00000125170	847.072	-0.219855	0.116961	-1.87711	0.0605024	0.49646	DOK4	docking protein 4 [Source:HGNC Symbol;Acc:HGNC:19868]	protein_coding	coding	57471922	57487327	16	-1	chromosome
ENSG00000101365	1310.39	-0.154818	0.082493	-1.8763	0.0606137	0.496501	IDH3B	isocitrate dehydrogenase 3 (NAD(+)) beta [Source:HGNC Symbol;Acc:HGNC:5385]	protein_coding	coding	2658395	2664219	20	-1	chromosome
ENSG00000164117	108.488	-0.26192	0.13892	-1.8765	0.060587	0.496501	FBXO8	F-box protein 8 [Source:HGNC Symbol;Acc:HGNC:13587]	protein_coding	coding	174236658	174284264	4	-1	chromosome
ENSG00000225830	151.161	0.262558	0.13937	1.87639	0.0606019	0.496501	ERCC6	ERCC excision repair 6, chromatin remodeling factor [Source:HGNC Symbol;Acc:HGNC:3438]	protein_coding	coding	49455368	49539538	10	-1	chromosome
ENSG00000198087	1237.68	0.158283	0.0844189	1.87533	0.0607478	0.497308	CD2AP	CD2 associated protein [Source:HGNC Symbol;Acc:HGNC:14258]	protein_coding	coding	47477789	47627263	6	1	chromosome
ENSG00000147586	432.083	0.214253	0.114213	1.87503	0.060789	0.497355	MRPS28	mitochondrial ribosomal protein S28 [Source:HGNC Symbol;Acc:HGNC:14513]	protein_coding	coding	79918717	80030289	8	-1	chromosome
ENSG00000143479	18.851	-0.165658	0.0926926	-1.87459	0.0608486	0.497552	DYRK3	dual specificity tyrosine phosphorylation regulated kinase 3 [Source:HGNC Symbol;Acc:HGNC:3094]	protein_coding	coding	206635536	206684419	1	1	chromosome
ENSG00000104853	604.721	-0.214357	0.114203	-1.8743	0.0608887	0.497589	CLPTM1	CLPTM1, transmembrane protein [Source:HGNC Symbol;Acc:HGNC:2087]	protein_coding	coding	44954585	44993341	19	1	chromosome
ENSG00000113721	95.4008	-0.257904	0.138687	-1.87323	0.0610369	0.497605	PDGFRB	platelet derived growth factor receptor beta [Source:HGNC Symbol;Acc:HGNC:8804]	protein_coding	coding	150113837	150155872	5	-1	chromosome
ENSG00000114656	31.3163	0.21825	0.118138	1.87211	0.061191	0.497605	KIAA1257	KIAA1257 [Source:HGNC Symbol;Acc:HGNC:29231]	protein_coding	coding	128909866	129002690	3	-1	chromosome
ENSG00000135503	348.209	-0.223086	0.119115	-1.87221	0.061178	0.497605	ACVR1B	activin A receptor type 1B [Source:HGNC Symbol;Acc:HGNC:172]	protein_coding	coding	51951667	51997078	12	1	chromosome
ENSG00000163517	183.682	0.256848	0.137795	1.87136	0.0612951	0.497605	HDAC11	histone deacetylase 11 [Source:HGNC Symbol;Acc:HGNC:19086]	protein_coding	coding	13479724	13506424	3	1	chromosome
ENSG00000166278	1852.94	0.122377	0.0653922	1.87163	0.0612575	0.497605	C2	complement C2 [Source:HGNC Symbol;Acc:HGNC:1248]	protein_coding	coding	31897785	31945672	6	1	chromosome
ENSG00000167815	1990.15	-0.136516	0.0728917	-1.87246	0.0611426	0.497605	PRDX2	peroxiredoxin 2 [Source:HGNC Symbol;Acc:HGNC:9353]	protein_coding	coding	12796820	12801859	19	-1	chromosome
ENSG00000171067	562.626	0.195602	0.104631	1.87162	0.0612587	0.497605	C11orf24	chromosome 11 open reading frame 24 [Source:HGNC Symbol;Acc:HGNC:1174]	protein_coding	coding	68261335	68272001	11	-1	chromosome
ENSG00000172728	220.151	0.257438	0.137476	1.87355	0.0609927	0.497605	FUT10	fucosyltransferase 10 [Source:HGNC Symbol;Acc:HGNC:19234]	protein_coding	coding	33370824	33473422	8	-1	chromosome
ENSG00000183048	885.905	-0.1611	0.0860407	-1.87157	0.0612659	0.497605	SLC25A10	solute carrier family 25 member 10 [Source:HGNC Symbol;Acc:HGNC:10980]	protein_coding	coding	81712236	81721016	17	1	chromosome
ENSG00000185164	4863.29	-0.15942	0.0851793	-1.8712	0.0613169	0.497605	NOMO2	NODAL modulator 2 [Source:HGNC Symbol;Acc:HGNC:22652]	protein_coding	coding	18417325	18562211	16	-1	chromosome
ENSG00000251503	24.999	-0.201322	0.110637	-1.87358	0.060989	0.497605	CENPS-CORT	CENPS-CORT readthrough [Source:HGNC Symbol;Acc:HGNC:38843]	protein_coding	coding	10430102	10452153	1	1	chromosome
ENSG00000260257	28.6455	0.20561	0.112281	1.8723	0.0611653	0.497605	AL035071.1	NA	lincRNA	noncoding	32856621	32858751	20	1	chromosome
ENSG00000174282	222.847	0.226566	0.121188	1.8709	0.0613593	0.497661	ZBTB4	zinc finger and BTB domain containing 4 [Source:HGNC Symbol;Acc:HGNC:23847]	protein_coding	coding	7459366	7484263	17	-1	chromosome
ENSG00000209082	29.8607	-0.224108	0.121492	-1.87024	0.061451	0.498116	MT-TL1	mitochondrially encoded tRNA leucine 1 (UUA/G) [Source:HGNC Symbol;Acc:HGNC:7490]	Mt_tRNA	mito	3230	3304	MT	1	chromosome
ENSG00000108846	662.627	-0.201832	0.108	-1.86941	0.0615661	0.498317	ABCC3	ATP binding cassette subfamily C member 3 [Source:HGNC Symbol;Acc:HGNC:54]	protein_coding	coding	50634777	50692252	17	1	chromosome
ENSG00000170502	409.106	0.19623	0.105027	1.86929	0.0615826	0.498317	NUDT9	nudix hydrolase 9 [Source:HGNC Symbol;Acc:HGNC:8056]	protein_coding	coding	87422582	87459454	4	1	chromosome
ENSG00000171962	28.9283	0.185734	0.101499	1.86957	0.0615431	0.498317	DRC3	dynein regulatory complex subunit 3 [Source:HGNC Symbol;Acc:HGNC:25384]	protein_coding	coding	17972813	18016889	17	1	chromosome
ENSG00000075340	10.5068	0.0810989	0.0521259	1.86466	0.0622297	0.498854	ADD2	adducin 2 [Source:HGNC Symbol;Acc:HGNC:244]	protein_coding	coding	70607618	70768225	2	-1	chromosome
ENSG00000101337	2041.05	-0.173724	0.0930112	-1.8669	0.0619162	0.498854	TM9SF4	transmembrane 9 superfamily member 4 [Source:HGNC Symbol;Acc:HGNC:30797]	protein_coding	coding	32109506	32167258	20	1	chromosome
ENSG00000108946	4374.58	-0.0940922	0.0504688	-1.8643	0.0622801	0.498854	PRKAR1A	protein kinase cAMP-dependent type I regulatory subunit alpha [Source:HGNC Symbol;Acc:HGNC:9388]	protein_coding	coding	68511780	68551319	17	1	chromosome
ENSG00000114648	305.197	-0.2579	0.138746	-1.86721	0.0618724	0.498854	KLHL18	kelch like family member 18 [Source:HGNC Symbol;Acc:HGNC:29120]	protein_coding	coding	47282917	47346816	3	1	chromosome
ENSG00000117472	60.4151	0.253756	0.136535	1.86438	0.0622681	0.498854	TSPAN1	tetraspanin 1 [Source:HGNC Symbol;Acc:HGNC:20657]	protein_coding	coding	46175073	46185958	1	1	chromosome
ENSG00000120327	15.2062	0.150929	0.0855813	1.86423	0.06229	0.498854	PCDHB14	protocadherin beta 14 [Source:HGNC Symbol;Acc:HGNC:8685]	protein_coding	coding	141222932	141227759	5	1	chromosome
ENSG00000132664	351.188	0.243583	0.130776	1.86497	0.0621853	0.498854	POLR3F	RNA polymerase III subunit F [Source:HGNC Symbol;Acc:HGNC:15763]	protein_coding	coding	18467127	18484643	20	1	chromosome
ENSG00000140497	782.191	-0.186583	0.0999282	-1.86683	0.0619251	0.498854	SCAMP2	secretory carrier membrane protein 2 [Source:HGNC Symbol;Acc:HGNC:10564]	protein_coding	coding	74843730	74873365	15	-1	chromosome
ENSG00000143515	689.844	-0.189342	0.101526	-1.86478	0.0622118	0.498854	ATP8B2	ATPase phospholipid transporting 8B2 [Source:HGNC Symbol;Acc:HGNC:13534]	protein_coding	coding	154325553	154351307	1	1	chromosome
ENSG00000149582	95.6402	0.258837	0.139389	1.86811	0.0617471	0.498854	TMEM25	transmembrane protein 25 [Source:HGNC Symbol;Acc:HGNC:25890]	protein_coding	coding	118531041	118547280	11	1	chromosome
ENSG00000160678	1574.71	-0.137582	0.0737096	-1.86611	0.0620259	0.498854	S100A1	S100 calcium binding protein A1 [Source:HGNC Symbol;Acc:HGNC:10486]	protein_coding	coding	153627926	153632039	1	1	chromosome
ENSG00000165480	310.441	-0.209142	0.11218	-1.86429	0.0622816	0.498854	SKA3	spindle and kinetochore associated complex subunit 3 [Source:HGNC Symbol;Acc:HGNC:20262]	protein_coding	coding	21153595	21176602	13	-1	chromosome
ENSG00000169758	10.5024	0.173669	0.0944604	1.86742	0.0618435	0.498854	TMEM266	transmembrane protein 266 [Source:HGNC Symbol;Acc:HGNC:26763]	protein_coding	coding	76059837	76229121	15	1	chromosome
ENSG00000170043	369.992	-0.22805	0.122053	-1.86519	0.0621551	0.498854	TRAPPC1	trafficking protein particle complex 1 [Source:HGNC Symbol;Acc:HGNC:19894]	protein_coding	coding	7930345	7932123	17	-1	chromosome
ENSG00000178719	483.465	-0.206113	0.110413	-1.86459	0.0622394	0.498854	GRINA	glutamate ionotropic receptor NMDA type subunit associated protein 1 [Source:HGNC Symbol;Acc:HGNC:4589]	protein_coding	coding	143990058	143993415	8	1	chromosome
ENSG00000179104	20.412	0.198134	0.108968	1.86537	0.0621291	0.498854	TMTC2	transmembrane and tetratricopeptide repeat containing 2 [Source:HGNC Symbol;Acc:HGNC:25440]	protein_coding	coding	82686880	83134870	12	1	chromosome
ENSG00000263731	36.506	0.232687	0.124284	1.86653	0.0619676	0.498854	AC145207.5	NA	lincRNA	noncoding	81878425	81881106	17	-1	chromosome
ENSG00000270898	10.4581	0.131105	0.0737142	1.86837	0.0617102	0.498854	GPR75-ASB3	GPR75-ASB3 readthrough [Source:HGNC Symbol;Acc:HGNC:40043]	protein_coding	coding	53670293	53860160	2	-1	chromosome
ENSG00000048544	829.02	0.171051	0.0923124	1.85359	0.063798	0.499	MRPS10	mitochondrial ribosomal protein S10 [Source:HGNC Symbol;Acc:HGNC:14502]	protein_coding	coding	42206801	42217865	6	-1	chromosome
ENSG00000083937	582.897	0.195736	0.105246	1.8593	0.0629847	0.499	CHMP2B	charged multivesicular body protein 2B [Source:HGNC Symbol;Acc:HGNC:24537]	protein_coding	coding	87227271	87255548	3	1	chromosome
ENSG00000088325	3383.87	0.106875	0.0576789	1.85295	0.0638893	0.499	TPX2	TPX2, microtubule nucleation factor [Source:HGNC Symbol;Acc:HGNC:1249]	protein_coding	coding	31739271	31801805	20	1	chromosome
ENSG00000103512	5333.86	-0.121083	0.0652694	-1.85495	0.0636027	0.499	NOMO1	NODAL modulator 1 [Source:HGNC Symbol;Acc:HGNC:30060]	protein_coding	coding	14833681	14896160	16	1	chromosome
ENSG00000104760	1651.56	0.159322	0.0858706	1.85592	0.0634648	0.499	FGL1	fibrinogen like 1 [Source:HGNC Symbol;Acc:HGNC:3695]	protein_coding	coding	17864380	17910365	8	-1	chromosome
ENSG00000107566	1624.29	-0.136768	0.0733882	-1.86314	0.0624432	0.499	ERLIN1	ER lipid raft associated 1 [Source:HGNC Symbol;Acc:HGNC:16947]	protein_coding	coding	100150094	100188334	10	-1	chromosome
ENSG00000109079	417.164	-0.236066	0.126926	-1.86029	0.0628443	0.499	TNFAIP1	TNF alpha induced protein 1 [Source:HGNC Symbol;Acc:HGNC:11894]	protein_coding	coding	28335602	28347009	17	1	chromosome
ENSG00000113719	1555.9	-0.160603	0.0863819	-1.85832	0.063124	0.499	ERGIC1	endoplasmic reticulum-golgi intermediate compartment 1 [Source:HGNC Symbol;Acc:HGNC:29205]	protein_coding	coding	172834275	172952685	5	1	chromosome
ENSG00000119396	1219.19	0.195305	0.104945	1.8623	0.0625601	0.499	RAB14	RAB14, member RAS oncogene family [Source:HGNC Symbol;Acc:HGNC:16524]	protein_coding	coding	121178137	121223014	9	-1	chromosome
ENSG00000122376	893.413	0.15877	0.0852633	1.86194	0.062611	0.499	FAM35A	family with sequence similarity 35 member A [Source:HGNC Symbol;Acc:HGNC:28773]	protein_coding	coding	87094161	87191468	10	1	chromosome
ENSG00000123728	516.459	0.22031	0.118865	1.85398	0.0637427	0.499	RAP2C	RAP2C, member of RAS oncogene family [Source:HGNC Symbol;Acc:HGNC:21165]	protein_coding	coding	132203024	132219480	X	-1	chromosome
ENSG00000130332	494.636	-0.2139	0.11525	-1.8565	0.0633823	0.499	LSM7	LSM7 homolog, U6 small nuclear RNA and mRNA degradation associated [Source:HGNC Symbol;Acc:HGNC:20470]	protein_coding	coding	2321517	2328620	19	-1	chromosome
ENSG00000130511	206.844	-0.245407	0.132284	-1.85425	0.063703	0.499	SSBP4	single stranded DNA binding protein 4 [Source:HGNC Symbol;Acc:HGNC:15676]	protein_coding	coding	18418864	18434562	19	1	chromosome
ENSG00000134317	234.1	0.256954	0.139425	1.85261	0.0639376	0.499	GRHL1	grainyhead like transcription factor 1 [Source:HGNC Symbol;Acc:HGNC:17923]	protein_coding	coding	9951693	10002277	2	1	chromosome
ENSG00000137944	404.978	0.213265	0.114768	1.86129	0.0627035	0.499	KYAT3	kynurenine aminotransferase 3 [Source:HGNC Symbol;Acc:HGNC:33238]	protein_coding	coding	88935773	88992953	1	-1	chromosome
ENSG00000144647	188.402	-0.236715	0.126994	-1.86264	0.0625133	0.499	POMGNT2	protein O-linked mannose N-acetylglucosaminyltransferase 2 (beta 1,4-) [Source:HGNC Symbol;Acc:HGNC:25902]	protein_coding	coding	43079232	43106076	3	-1	chromosome
ENSG00000151422	535.95	0.226962	0.122042	1.86268	0.0625067	0.499	FER	FER tyrosine kinase [Source:HGNC Symbol;Acc:HGNC:3655]	protein_coding	coding	108747822	109196841	5	1	chromosome
ENSG00000153885	320.075	-0.233143	0.125597	-1.85354	0.0638049	0.499	KCTD15	potassium channel tetramerization domain containing 15 [Source:HGNC Symbol;Acc:HGNC:23297]	protein_coding	coding	33795933	33815763	19	1	chromosome
ENSG00000161791	33.2169	0.237143	0.128748	1.85596	0.0634587	0.499	FMNL3	formin like 3 [Source:HGNC Symbol;Acc:HGNC:23698]	protein_coding	coding	49636499	49708165	12	-1	chromosome
ENSG00000162772	75.4932	0.251081	0.135736	1.8585	0.0630984	0.499	ATF3	activating transcription factor 3 [Source:HGNC Symbol;Acc:HGNC:785]	protein_coding	coding	212565334	212620777	1	1	chromosome
ENSG00000163633	51.2299	-0.255338	0.137149	-1.86352	0.0623888	0.499	C4orf36	chromosome 4 open reading frame 36 [Source:HGNC Symbol;Acc:HGNC:28386]	protein_coding	coding	86876205	86936202	4	-1	chromosome
ENSG00000163938	2410.4	0.124331	0.0669221	1.8579	0.0631835	0.499	GNL3	G protein nucleolar 3 [Source:HGNC Symbol;Acc:HGNC:29931]	protein_coding	coding	52681156	52694492	3	1	chromosome
ENSG00000165507	211.075	0.243392	0.131346	1.858	0.0631687	0.499	C10orf10	chromosome 10 open reading frame 10 [Source:HGNC Symbol;Acc:HGNC:23355]	protein_coding	coding	44970981	44978810	10	-1	chromosome
ENSG00000167106	630.869	0.179584	0.0966521	1.85841	0.0631111	0.499	FAM102A	family with sequence similarity 102 member A [Source:HGNC Symbol;Acc:HGNC:31419]	protein_coding	coding	127940579	127980513	9	-1	chromosome
ENSG00000172466	1419.16	0.161255	0.0870191	1.85375	0.0637751	0.499	ZNF24	zinc finger protein 24 [Source:HGNC Symbol;Acc:HGNC:13032]	protein_coding	coding	35332212	35345482	18	-1	chromosome
ENSG00000172809	4778.01	-0.121599	0.0653427	-1.86076	0.0627782	0.499	RPL38	ribosomal protein L38 [Source:HGNC Symbol;Acc:HGNC:10349]	protein_coding	coding	74203582	74210655	17	1	chromosome
ENSG00000173744	1689.51	-0.152148	0.0819309	-1.85647	0.0633866	0.499	AGFG1	ArfGAP with FG repeats 1 [Source:HGNC Symbol;Acc:HGNC:5175]	protein_coding	coding	227472152	227561214	2	1	chromosome
ENSG00000175548	249.215	0.233603	0.126404	1.85315	0.0638613	0.499	ALG10B	ALG10B, alpha-1,2-glucosyltransferase [Source:HGNC Symbol;Acc:HGNC:31088]	protein_coding	coding	38316578	38329728	12	1	chromosome
ENSG00000184828	13.2948	-0.152282	0.0845673	-1.86107	0.0627343	0.499	ZBTB7C	zinc finger and BTB domain containing 7C [Source:HGNC Symbol;Acc:HGNC:31700]	protein_coding	coding	48026673	48410752	18	-1	chromosome
ENSG00000184983	678.68	-0.166168	0.0895406	-1.8558	0.063482	0.499	NDUFA6	NADH:ubiquinone oxidoreductase subunit A6 [Source:HGNC Symbol;Acc:HGNC:7690]	protein_coding	coding	42085525	42090955	22	-1	chromosome
ENSG00000186185	406.383	-0.228053	0.122189	-1.86263	0.0625147	0.499	KIF18B	kinesin family member 18B [Source:HGNC Symbol;Acc:HGNC:27102]	protein_coding	coding	44924709	44947711	17	-1	chromosome
ENSG00000188706	705.537	0.17252	0.0928034	1.85946	0.0629625	0.499	ZDHHC9	zinc finger DHHC-type containing 9 [Source:HGNC Symbol;Acc:HGNC:18475]	protein_coding	coding	129803288	129843909	X	-1	chromosome
ENSG00000197299	191.303	-0.24719	0.132872	-1.8566	0.0633688	0.499	BLM	Bloom syndrome RecQ like helicase [Source:HGNC Symbol;Acc:HGNC:1058]	protein_coding	coding	90717327	90816165	15	1	chromosome
ENSG00000197969	1029.12	0.169896	0.0917486	1.8523	0.0639825	0.499	VPS13A	vacuolar protein sorting 13 homolog A [Source:HGNC Symbol;Acc:HGNC:1908]	protein_coding	coding	77177353	77421541	9	1	chromosome
ENSG00000198468	83.3541	-0.260077	0.138874	-1.86072	0.062784	0.499	FLVCR1-AS1	FLVCR1 antisense RNA 1 (head to head) [Source:HGNC Symbol;Acc:HGNC:39077]	lincRNA	noncoding	212852108	212858088	1	-1	chromosome
ENSG00000205629	450.49	0.235786	0.127488	1.85393	0.0637486	0.499	LCMT1	leucine carboxyl methyltransferase 1 [Source:HGNC Symbol;Acc:HGNC:17557]	protein_coding	coding	25111729	25178231	16	1	chromosome
ENSG00000210127	145.067	-0.258955	0.139404	-1.86036	0.0628349	0.499	MT-TA	mitochondrially encoded tRNA alanine [Source:HGNC Symbol;Acc:HGNC:7475]	Mt_tRNA	mito	5587	5655	MT	-1	chromosome
ENSG00000213445	109.832	0.259559	0.139405	1.85432	0.063693	0.499	SIPA1	signal-induced proliferation-associated 1 [Source:HGNC Symbol;Acc:HGNC:10885]	protein_coding	coding	65638097	65650930	11	1	chromosome
ENSG00000213741	3381.66	-0.127031	0.0682538	-1.86096	0.0627505	0.499	RPS29	ribosomal protein S29 [Source:HGNC Symbol;Acc:HGNC:10419]	protein_coding	coding	49570984	49599164	14	-1	chromosome
ENSG00000215790	22.6574	-0.203327	0.110363	-1.86041	0.0628272	0.499	SLC35E2	solute carrier family 35 member E2 [Source:HGNC Symbol;Acc:HGNC:20863]	protein_coding	coding	1724838	1745992	1	-1	chromosome
ENSG00000234545	828.36	0.158948	0.0857373	1.85427	0.0637005	0.499	FAM133B	family with sequence similarity 133 member B [Source:HGNC Symbol;Acc:HGNC:28629]	protein_coding	coding	92560793	92590394	7	-1	chromosome
ENSG00000240303	520.278	-0.225725	0.121711	-1.85363	0.0637922	0.499	ACAD11	acyl-CoA dehydrogenase family member 11 [Source:HGNC Symbol;Acc:HGNC:30211]	protein_coding	coding	132558138	132660723	3	-1	chromosome
ENSG00000243989	807.115	-0.170701	0.0919664	-1.85497	0.0636007	0.499	ACY1	aminoacylase 1 [Source:HGNC Symbol;Acc:HGNC:177]	protein_coding	coding	51983278	51989202	3	1	chromosome
ENSG00000261061	44.1506	0.250059	0.134706	1.85241	0.0639674	0.499	AC092718.4	NA	sense_intronic	other	81030770	81031485	16	1	chromosome
ENSG00000261618	17.8544	0.153631	0.0876013	1.85504	0.0635907	0.499	AC083837.1	NA	lincRNA	noncoding	78837529	78840522	8	1	chromosome
ENSG00000272667	50.1634	0.252312	0.136296	1.8551	0.0635823	0.499	AC012306.2	NA	lincRNA	noncoding	127886556	127887185	2	1	chromosome
ENSG00000273749	1229.67	-0.170683	0.0919567	-1.85647	0.0633869	0.499	CYFIP1	cytoplasmic FMR1 interacting protein 1 [Source:HGNC Symbol;Acc:HGNC:13759]	protein_coding	coding	22867052	22981063	15	-1	chromosome
ENSG00000119782	256.049	-0.229501	0.12397	-1.85102	0.0641662	0.499926	FKBP1B	FK506 binding protein 1B [Source:HGNC Symbol;Acc:HGNC:3712]	protein_coding	coding	24049701	24063681	2	1	chromosome
ENSG00000134684	1400.69	0.139017	0.075125	1.85098	0.0641726	0.499926	YARS	tyrosyl-tRNA synthetase [Source:HGNC Symbol;Acc:HGNC:12840]	protein_coding	coding	32775237	32818153	1	-1	chromosome
ENSG00000025434	243.787	0.229201	0.124145	1.85044	0.0642508	0.500205	NR1H3	nuclear receptor subfamily 1 group H member 3 [Source:HGNC Symbol;Acc:HGNC:7966]	protein_coding	coding	47248300	47269032	11	1	chromosome
ENSG00000129474	1980.06	0.180145	0.0974128	1.85023	0.0642799	0.500205	AJUBA	ajuba LIM protein [Source:HGNC Symbol;Acc:HGNC:20250]	protein_coding	coding	22971174	22982642	14	-1	chromosome
ENSG00000100412	1042.88	-0.167286	0.0903874	-1.84975	0.06435	0.500473	ACO2	aconitase 2 [Source:HGNC Symbol;Acc:HGNC:118]	protein_coding	coding	41469125	41528989	22	1	chromosome
ENSG00000205485	49.2088	0.248983	0.135439	1.84838	0.064548	0.501586	AC004980.1	NA	transcribed_unprocessed_pseudogene	pseudo	76549360	76627982	7	1	chromosome
ENSG00000214106	36.8424	-0.233274	0.127321	-1.84826	0.0645648	0.501586	PAXIP1-AS2	PAXIP1 antisense RNA 2 [Source:HGNC Symbol;Acc:HGNC:48958]	antisense_RNA	other	154928498	154949908	7	1	chromosome
ENSG00000183826	96.5044	0.254263	0.1388	1.8476	0.0646603	0.501771	BTBD9	BTB domain containing 9 [Source:HGNC Symbol;Acc:HGNC:21228]	protein_coding	coding	38168451	38640148	6	-1	chromosome
ENSG00000242485	691.74	0.168285	0.0911075	1.84765	0.0646526	0.501771	MRPL20	mitochondrial ribosomal protein L20 [Source:HGNC Symbol;Acc:HGNC:14478]	protein_coding	coding	1401908	1407313	1	-1	chromosome
ENSG00000107560	256.196	0.256083	0.138805	1.84649	0.064821	0.502506	RAB11FIP2	RAB11 family interacting protein 2 [Source:HGNC Symbol;Acc:HGNC:29152]	protein_coding	coding	118004916	118046603	10	-1	chromosome
ENSG00000163013	150.815	-0.258507	0.139288	-1.84645	0.0648267	0.502506	FBXO41	F-box protein 41 [Source:HGNC Symbol;Acc:HGNC:29409]	protein_coding	coding	73254682	73284431	2	-1	chromosome
ENSG00000047578	290.202	0.242795	0.131715	1.8453	0.0649937	0.502542	KIAA0556	KIAA0556 [Source:HGNC Symbol;Acc:HGNC:29068]	protein_coding	coding	27550133	27780369	16	1	chromosome
ENSG00000107185	461.703	-0.195664	0.105954	-1.84525	0.0650005	0.502542	RGP1	RGP1 homolog, RAB6A GEF complex partner 1 [Source:HGNC Symbol;Acc:HGNC:21965]	protein_coding	coding	35749287	35758575	9	1	chromosome
ENSG00000142197	118.578	-0.239502	0.129606	-1.84469	0.0650826	0.502542	DOPEY2	dopey family member 2 [Source:HGNC Symbol;Acc:HGNC:1291]	protein_coding	coding	36156782	36294274	21	1	chromosome
ENSG00000149532	881.644	-0.187811	0.101661	-1.84591	0.064905	0.502542	CPSF7	cleavage and polyadenylation specific factor 7 [Source:HGNC Symbol;Acc:HGNC:30098]	protein_coding	coding	61402641	61430031	11	-1	chromosome
ENSG00000157259	494.675	0.188499	0.102128	1.84539	0.0649805	0.502542	GATAD1	GATA zinc finger domain containing 1 [Source:HGNC Symbol;Acc:HGNC:29941]	protein_coding	coding	92447453	92458836	7	1	chromosome
ENSG00000197555	532.619	0.214387	0.116314	1.84476	0.0650729	0.502542	SIPA1L1	signal induced proliferation associated 1 like 1 [Source:HGNC Symbol;Acc:HGNC:20284]	protein_coding	coding	71320449	71741229	14	1	chromosome
ENSG00000213780	327.215	0.24854	0.134436	1.84517	0.0650122	0.502542	GTF2H4	general transcription factor IIH subunit 4 [Source:HGNC Symbol;Acc:HGNC:4658]	protein_coding	coding	30908184	30914106	6	1	chromosome
ENSG00000150779	415.91	-0.191276	0.103652	-1.84366	0.0652329	0.503148	TIMM8B	translocase of inner mitochondrial membrane 8 homolog B [Source:HGNC Symbol;Acc:HGNC:11818]	protein_coding	coding	112084800	112086798	11	-1	chromosome
ENSG00000217801	63.5222	0.254862	0.137616	1.84372	0.065224	0.503148	AL390719.1	NA	transcribed_unprocessed_pseudogene	pseudo	1059734	1069355	1	1	chromosome
ENSG00000070214	1432.67	-0.145713	0.0790531	-1.84337	0.0652753	0.503198	SLC44A1	solute carrier family 44 member 1 [Source:HGNC Symbol;Acc:HGNC:18798]	protein_coding	coding	105244622	105439171	9	1	chromosome
ENSG00000117500	3241.48	0.120318	0.0652992	1.84268	0.0653752	0.50329	TMED5	transmembrane p24 trafficking protein 5 [Source:HGNC Symbol;Acc:HGNC:24251]	protein_coding	coding	93149742	93180728	1	-1	chromosome
ENSG00000141664	1173.51	-0.145181	0.078787	-1.84255	0.065395	0.50329	ZCCHC2	zinc finger CCHC-type containing 2 [Source:HGNC Symbol;Acc:HGNC:22916]	protein_coding	coding	62523007	62587709	18	1	chromosome
ENSG00000164733	5813.63	-0.104034	0.0564579	-1.84255	0.065395	0.50329	CTSB	cathepsin B [Source:HGNC Symbol;Acc:HGNC:2527]	protein_coding	coding	11842524	11869448	8	-1	chromosome
ENSG00000103540	464.613	0.244748	0.13332	1.8411	0.0656071	0.504645	CCP110	centriolar coiled-coil protein 110 [Source:HGNC Symbol;Acc:HGNC:24342]	protein_coding	coding	19523811	19553408	16	1	chromosome
ENSG00000243678	5198.37	-0.0968947	0.0526423	-1.84053	0.0656901	0.505006	NME2	NME/NM23 nucleoside diphosphate kinase 2 [Source:HGNC Symbol;Acc:HGNC:7850]	protein_coding	coding	51165435	51171747	17	1	chromosome
ENSG00000079999	678.962	-0.198477	0.107824	-1.83857	0.0659788	0.506415	KEAP1	kelch like ECH associated protein 1 [Source:HGNC Symbol;Acc:HGNC:23177]	protein_coding	coding	10486120	10503741	19	-1	chromosome
ENSG00000148834	2062.72	0.132673	0.0721427	1.83893	0.0659262	0.506415	GSTO1	glutathione S-transferase omega 1 [Source:HGNC Symbol;Acc:HGNC:13312]	protein_coding	coding	104235356	104267459	10	1	chromosome
ENSG00000166783	663.319	0.232338	0.12633	1.8383	0.066018	0.506415	MARF1	meiosis regulator and mRNA stability factor 1 [Source:HGNC Symbol;Acc:HGNC:29562]	protein_coding	coding	15594386	15643166	16	-1	chromosome
ENSG00000170271	162.717	-0.25152	0.136445	-1.83853	0.0659846	0.506415	FAXDC2	fatty acid hydroxylase domain containing 2 [Source:HGNC Symbol;Acc:HGNC:1334]	protein_coding	coding	154818491	154859252	5	-1	chromosome
ENSG00000151465	1431.57	-0.155735	0.0847445	-1.83714	0.0661885	0.506897	CDC123	cell division cycle 123 [Source:HGNC Symbol;Acc:HGNC:16827]	protein_coding	coding	12195965	12250589	10	1	chromosome
ENSG00000168887	357.937	-0.208482	0.1135	-1.83689	0.0662255	0.506897	C2orf68	chromosome 2 open reading frame 68 [Source:HGNC Symbol;Acc:HGNC:34353]	protein_coding	coding	85606654	85612066	2	-1	chromosome
ENSG00000175387	761.978	-0.154447	0.0840296	-1.83751	0.0661348	0.506897	SMAD2	SMAD family member 2 [Source:HGNC Symbol;Acc:HGNC:6768]	protein_coding	coding	47808957	47931146	18	-1	chromosome
ENSG00000229227	28.7077	0.226825	0.123704	1.83703	0.0662053	0.506897	AL356056.1	NA	lincRNA	noncoding	46597918	46612154	10	1	chromosome
ENSG00000239672	2496.13	-0.111544	0.060729	-1.8365	0.0662841	0.507068	NME1	NME/NM23 nucleoside diphosphate kinase 1 [Source:HGNC Symbol;Acc:HGNC:7849]	protein_coding	coding	51153536	51162428	17	1	chromosome
ENSG00000114745	407.051	-0.198938	0.108193	-1.83617	0.0663332	0.507167	GORASP1	golgi reassembly stacking protein 1 [Source:HGNC Symbol;Acc:HGNC:16769]	protein_coding	coding	39096659	39108363	3	-1	chromosome
ENSG00000184110	9562.4	-0.126689	0.0690235	-1.83531	0.0664598	0.507857	EIF3C	eukaryotic translation initiation factor 3 subunit C [Source:HGNC Symbol;Acc:HGNC:3279]	protein_coding	coding	28688558	28735730	16	1	chromosome
ENSG00000107829	265.977	-0.232396	0.126346	-1.83406	0.0666448	0.507948	FBXW4	F-box and WD repeat domain containing 4 [Source:HGNC Symbol;Acc:HGNC:10847]	protein_coding	coding	101610664	101695295	10	-1	chromosome
ENSG00000116885	16.5384	0.167079	0.0946039	1.83472	0.0665472	0.507948	OSCP1	organic solute carrier partner 1 [Source:HGNC Symbol;Acc:HGNC:29971]	protein_coding	coding	36415827	36450451	1	-1	chromosome
ENSG00000159625	20.2773	-0.196467	0.108746	-1.83376	0.0666892	0.507948	DRC7	dynein regulatory complex subunit 7 [Source:HGNC Symbol;Acc:HGNC:25289]	protein_coding	coding	57694793	57731805	16	1	chromosome
ENSG00000161980	262.779	-0.224774	0.122279	-1.83448	0.0665823	0.507948	POLR3K	RNA polymerase III subunit K [Source:HGNC Symbol;Acc:HGNC:14121]	protein_coding	coding	46407	53628	16	-1	chromosome
ENSG00000171135	513.676	-0.18888	0.102863	-1.83439	0.0665967	0.507948	JAGN1	jagunal homolog 1 [Source:HGNC Symbol;Acc:HGNC:26926]	protein_coding	coding	9890554	9894349	3	1	chromosome
ENSG00000261067	17.1209	-0.185538	0.103108	-1.83391	0.0666673	0.507948	AC109460.3	NA	processed_transcript	other	28974804	28990775	16	1	chromosome
ENSG00000136206	14.473	0.118835	0.0713456	1.83325	0.066765	0.508248	SPDYE1	speedy/RINGO cell cycle regulator family member E1 [Source:HGNC Symbol;Acc:HGNC:16408]	protein_coding	coding	44000889	44010122	7	1	chromosome
ENSG00000144485	414.014	0.203672	0.111252	1.83295	0.0668107	0.508321	HES6	hes family bHLH transcription factor 6 [Source:HGNC Symbol;Acc:HGNC:18254]	protein_coding	coding	238238267	238240662	2	-1	chromosome
ENSG00000167645	253	-0.215052	0.117207	-1.83264	0.0668564	0.508392	YIF1B	Yip1 interacting factor homolog B, membrane trafficking protein [Source:HGNC Symbol;Acc:HGNC:30511]	protein_coding	coding	38305104	38317273	19	-1	chromosome
ENSG00000107164	838.914	-0.189439	0.1033	-1.83233	0.0669024	0.508466	FUBP3	far upstream element binding protein 3 [Source:HGNC Symbol;Acc:HGNC:4005]	protein_coding	coding	130578965	130638352	9	1	chromosome
ENSG00000214063	334.567	-0.227867	0.124139	-1.83112	0.0670823	0.509556	TSPAN4	tetraspanin 4 [Source:HGNC Symbol;Acc:HGNC:11859]	protein_coding	coding	842808	867116	11	1	chromosome
ENSG00000174547	684.219	0.19494	0.106423	1.83078	0.0671332	0.509666	MRPL11	mitochondrial ribosomal protein L11 [Source:HGNC Symbol;Acc:HGNC:14042]	protein_coding	coding	66435075	66466738	11	-1	chromosome
ENSG00000104805	1183.78	0.156716	0.085664	1.82953	0.0673195	0.5097	NUCB1	nucleobindin 1 [Source:HGNC Symbol;Acc:HGNC:8043]	protein_coding	coding	48900050	48923372	19	1	chromosome
ENSG00000122490	442.59	-0.240116	0.130923	-1.82961	0.067308	0.5097	PQLC1	PQ loop repeat containing 1 [Source:HGNC Symbol;Acc:HGNC:26188]	protein_coding	coding	79902420	79951664	18	-1	chromosome
ENSG00000129562	1856.35	0.143919	0.0786162	1.83039	0.0671913	0.5097	DAD1	defender against cell death 1 [Source:HGNC Symbol;Acc:HGNC:2664]	protein_coding	coding	22564905	22589269	14	-1	chromosome
ENSG00000146007	1116.51	-0.144659	0.0790313	-1.8297	0.0672941	0.5097	ZMAT2	zinc finger matrin-type 2 [Source:HGNC Symbol;Acc:HGNC:26433]	protein_coding	coding	140698680	140706676	5	1	chromosome
ENSG00000182179	99.3762	0.252713	0.138222	1.82958	0.0673126	0.5097	UBA7	ubiquitin like modifier activating enzyme 7 [Source:HGNC Symbol;Acc:HGNC:12471]	protein_coding	coding	49805207	49813946	3	-1	chromosome
ENSG00000126814	275.396	0.246395	0.135096	1.82846	0.0674809	0.509776	TRMT5	tRNA methyltransferase 5 [Source:HGNC Symbol;Acc:HGNC:23141]	protein_coding	coding	60971451	60981358	14	-1	chromosome
ENSG00000137154	17229	0.112925	0.0617678	1.82818	0.0675221	0.509776	RPS6	ribosomal protein S6 [Source:HGNC Symbol;Acc:HGNC:10429]	protein_coding	coding	19375715	19380254	9	-1	chromosome
ENSG00000138821	39.7581	0.0509937	0.0396391	1.82887	0.0674188	0.509776	SLC39A8	solute carrier family 39 member 8 [Source:HGNC Symbol;Acc:HGNC:20862]	protein_coding	coding	102251041	102431258	4	-1	chromosome
ENSG00000157538	610.497	0.186561	0.102028	1.82801	0.0675479	0.509776	DSCR3	DSCR3 arrestin fold containing [Source:HGNC Symbol;Acc:HGNC:3044]	protein_coding	coding	37223420	37267919	21	-1	chromosome
ENSG00000189343	40.6275	0.247558	0.135364	1.82897	0.0674041	0.509776	AC004448.1	NA	processed_pseudogene	pseudo	19445970	19446852	17	-1	chromosome
ENSG00000197818	179.868	-0.249053	0.135756	-1.82862	0.0674562	0.509776	SLC9A8	solute carrier family 9 member A8 [Source:HGNC Symbol;Acc:HGNC:20728]	protein_coding	coding	49812713	49892242	20	1	chromosome
ENSG00000170190	37.3034	0.170108	0.0956717	1.82741	0.0676382	0.510182	SLC16A5	solute carrier family 16 member 5 [Source:HGNC Symbol;Acc:HGNC:10926]	protein_coding	coding	75087727	75106162	17	1	chromosome
ENSG00000068079	219.917	-0.224444	0.122802	-1.82546	0.0679311	0.510479	IFI35	interferon induced protein 35 [Source:HGNC Symbol;Acc:HGNC:5399]	protein_coding	coding	43006725	43014456	17	1	chromosome
ENSG00000141504	696.85	0.165858	0.0909169	1.82539	0.0679423	0.510479	SAT2	spermidine/spermine N1-acetyltransferase family member 2 [Source:HGNC Symbol;Acc:HGNC:23160]	protein_coding	coding	7626234	7627876	17	-1	chromosome
ENSG00000153487	158.278	-0.256102	0.139435	-1.82591	0.0678634	0.510479	ING1	inhibitor of growth family member 1 [Source:HGNC Symbol;Acc:HGNC:6062]	protein_coding	coding	110712736	110723339	13	1	chromosome
ENSG00000157483	496.822	-0.207671	0.113583	-1.82591	0.0678644	0.510479	MYO1E	myosin IE [Source:HGNC Symbol;Acc:HGNC:7599]	protein_coding	coding	59132434	59372900	15	-1	chromosome
ENSG00000158104	1788.73	-0.151942	0.0832165	-1.82521	0.0679691	0.510479	HPD	4-hydroxyphenylpyruvate dioxygenase [Source:HGNC Symbol;Acc:HGNC:5147]	protein_coding	coding	121839527	121863596	12	-1	chromosome
ENSG00000161202	835.977	-0.174685	0.0956725	-1.8262	0.0678202	0.510479	DVL3	dishevelled segment polarity protein 3 [Source:HGNC Symbol;Acc:HGNC:3087]	protein_coding	coding	184155388	184173610	3	1	chromosome
ENSG00000177984	112.552	-0.251878	0.137616	-1.82625	0.067812	0.510479	LCN15	lipocalin 15 [Source:HGNC Symbol;Acc:HGNC:33777]	protein_coding	coding	136759634	136766255	9	-1	chromosome
ENSG00000215483	11.7075	-0.1189	0.0706463	-1.82591	0.0678631	0.510479	LINC00598	long intergenic non-protein coding RNA 598 [Source:HGNC Symbol;Acc:HGNC:42770]	lincRNA	noncoding	40079106	40535807	13	-1	chromosome
ENSG00000047457	1310.4	0.174088	0.0954766	1.82448	0.068079	0.51103	CP	ceruloplasmin [Source:HGNC Symbol;Acc:HGNC:2295]	protein_coding	coding	149162410	149222055	3	-1	chromosome
ENSG00000179743	48.4962	0.241865	0.131855	1.8242	0.0681222	0.511081	FLJ37453	uncharacterized LOC729614 [Source:NCBI gene;Acc:729614]	antisense_RNA	other	15834474	15848147	1	-1	chromosome
ENSG00000066027	497.7	0.188603	0.103444	1.82355	0.0682194	0.511262	PPP2R5A	protein phosphatase 2 regulatory subunit B'alpha [Source:HGNC Symbol;Acc:HGNC:9309]	protein_coding	coding	212285537	212361863	1	1	chromosome
ENSG00000180776	1185.01	0.160388	0.087989	1.82366	0.068203	0.511262	ZDHHC20	zinc finger DHHC-type containing 20 [Source:HGNC Symbol;Acc:HGNC:20749]	protein_coding	coding	21372573	21459370	13	-1	chromosome
ENSG00000089351	346.474	-0.19945	0.109444	-1.82201	0.0684534	0.511375	GRAMD1A	GRAM domain containing 1A [Source:HGNC Symbol;Acc:HGNC:29305]	protein_coding	coding	34994784	35026471	19	1	chromosome
ENSG00000100625	108.241	-0.255369	0.139422	-1.82248	0.0683824	0.511375	SIX4	SIX homeobox 4 [Source:HGNC Symbol;Acc:HGNC:10890]	protein_coding	coding	60709528	60724348	14	-1	chromosome
ENSG00000108515	360.297	0.205025	0.112478	1.82206	0.0684462	0.511375	ENO3	enolase 3 [Source:HGNC Symbol;Acc:HGNC:3354]	protein_coding	coding	4948092	4957131	17	1	chromosome
ENSG00000134265	467.799	0.19806	0.108735	1.82236	0.0684008	0.511375	NAPG	NSF attachment protein gamma [Source:HGNC Symbol;Acc:HGNC:7642]	protein_coding	coding	10525905	10552761	18	1	chromosome
ENSG00000164946	877.182	0.234051	0.128598	1.82255	0.0683711	0.511375	FREM1	FRAS1 related extracellular matrix 1 [Source:HGNC Symbol;Acc:HGNC:23399]	protein_coding	coding	14734666	14910995	9	-1	chromosome
ENSG00000166889	681.698	-0.172856	0.0947689	-1.82275	0.0683414	0.511375	PATL1	PAT1 homolog 1, processing body mRNA decay factor [Source:HGNC Symbol;Acc:HGNC:26721]	protein_coding	coding	59636716	59668980	11	-1	chromosome
ENSG00000197712	680.606	-0.178704	0.0980608	-1.82143	0.0685417	0.511761	FAM114A1	family with sequence similarity 114 member A1 [Source:HGNC Symbol;Acc:HGNC:25087]	protein_coding	coding	38867677	38945739	4	1	chromosome
ENSG00000172572	35.4918	0.231362	0.126448	1.82076	0.0686432	0.512246	PDE3A	phosphodiesterase 3A [Source:HGNC Symbol;Acc:HGNC:8778]	protein_coding	coding	20369245	20684381	12	1	chromosome
ENSG00000111666	2138.6	0.13105	0.0720248	1.81968	0.068808	0.513202	CHPT1	choline phosphotransferase 1 [Source:HGNC Symbol;Acc:HGNC:17852]	protein_coding	coding	101696947	101744140	12	1	chromosome
ENSG00000104365	349.391	0.250389	0.137775	1.8194	0.0688509	0.513249	IKBKB	inhibitor of nuclear factor kappa B kinase subunit beta [Source:HGNC Symbol;Acc:HGNC:5960]	protein_coding	coding	42271302	42332653	8	1	chromosome
ENSG00000038002	215.892	-0.234368	0.128522	-1.81855	0.0689802	0.51394	AGA	aspartylglucosaminidase [Source:HGNC Symbol;Acc:HGNC:318]	protein_coding	coding	177430770	177442503	4	-1	chromosome
ENSG00000100796	1059.5	0.206141	0.113527	1.81776	0.0691002	0.51456	PPP4R3A	protein phosphatase 4 regulatory subunit 3A [Source:HGNC Symbol;Acc:HGNC:20219]	protein_coding	coding	91457611	91510554	14	-1	chromosome
ENSG00000052749	554.7	-0.19881	0.109356	-1.8166	0.0692778	0.514686	RRP12	ribosomal RNA processing 12 homolog [Source:HGNC Symbol;Acc:HGNC:29100]	protein_coding	coding	97356358	97426076	10	-1	chromosome
ENSG00000111276	776.414	0.207058	0.114031	1.81732	0.0691684	0.514686	CDKN1B	cyclin dependent kinase inhibitor 1B [Source:HGNC Symbol;Acc:HGNC:1785]	protein_coding	coding	12715058	12722371	12	1	chromosome
ENSG00000132688	1083.82	0.148375	0.0817148	1.81645	0.0693009	0.514686	NES	nestin [Source:HGNC Symbol;Acc:HGNC:7756]	protein_coding	coding	156668763	156677397	1	-1	chromosome
ENSG00000166170	502.139	0.207114	0.114066	1.81675	0.0692552	0.514686	BAG5	BCL2 associated athanogene 5 [Source:HGNC Symbol;Acc:HGNC:941]	protein_coding	coding	103556544	103562831	14	-1	chromosome
ENSG00000175063	566.805	0.180714	0.0994848	1.81682	0.0692444	0.514686	UBE2C	ubiquitin conjugating enzyme E2 C [Source:HGNC Symbol;Acc:HGNC:15937]	protein_coding	coding	45812576	45816957	20	1	chromosome
ENSG00000124795	5048.41	0.122657	0.0675456	1.81608	0.0693574	0.514777	DEK	DEK proto-oncogene [Source:HGNC Symbol;Acc:HGNC:2768]	protein_coding	coding	18223868	18264823	6	-1	chromosome
ENSG00000184922	16.5875	0.196535	0.108617	1.81589	0.0693867	0.514777	FMNL1	formin like 1 [Source:HGNC Symbol;Acc:HGNC:1212]	protein_coding	coding	45221444	45247320	17	1	chromosome
ENSG00000173442	285.06	-0.251213	0.138825	-1.81548	0.0694501	0.514975	EHBP1L1	EH domain binding protein 1 like 1 [Source:HGNC Symbol;Acc:HGNC:30682]	protein_coding	coding	65576038	65592650	11	1	chromosome
ENSG00000058668	208.409	-0.246204	0.135636	-1.81481	0.0695529	0.515024	ATP2B4	ATPase plasma membrane Ca2+ transporting 4 [Source:HGNC Symbol;Acc:HGNC:817]	protein_coding	coding	203626561	203744081	1	1	chromosome
ENSG00000119185	965.88	0.20351	0.112263	1.81448	0.0696038	0.515024	ITGB1BP1	integrin subunit beta 1 binding protein 1 [Source:HGNC Symbol;Acc:HGNC:23927]	protein_coding	coding	9403475	9423547	2	-1	chromosome
ENSG00000132182	1909.99	-0.117906	0.0649739	-1.81457	0.0695903	0.515024	NUP210	nucleoporin 210 [Source:HGNC Symbol;Acc:HGNC:30052]	protein_coding	coding	13316235	13420309	3	-1	chromosome
ENSG00000198015	1123.99	-0.137238	0.0755985	-1.81504	0.069518	0.515024	MRPL42	mitochondrial ribosomal protein L42 [Source:HGNC Symbol;Acc:HGNC:14493]	protein_coding	coding	93467488	93516213	12	1	chromosome
ENSG00000073605	55.9736	0.222789	0.12449	1.81317	0.0698058	0.515162	GSDMB	gasdermin B [Source:HGNC Symbol;Acc:HGNC:23690]	protein_coding	coding	39904595	39919854	17	-1	chromosome
ENSG00000112304	414.354	-0.208739	0.115059	-1.81282	0.0698591	0.515162	ACOT13	acyl-CoA thioesterase 13 [Source:HGNC Symbol;Acc:HGNC:20999]	protein_coding	coding	24667035	24705065	6	1	chromosome
ENSG00000144045	408.657	-0.248437	0.136939	-1.8127	0.0698776	0.515162	DQX1	DEAQ-box RNA dependent ATPase 1 [Source:HGNC Symbol;Acc:HGNC:20410]	protein_coding	coding	74518131	74526336	2	-1	chromosome
ENSG00000164953	95.7796	0.22381	0.125184	1.81288	0.06985	0.515162	TMEM67	transmembrane protein 67 [Source:HGNC Symbol;Acc:HGNC:28396]	protein_coding	coding	93754844	93819234	8	1	chromosome
ENSG00000169241	231.762	0.239098	0.131637	1.81252	0.0699063	0.515162	SLC50A1	solute carrier family 50 member 1 [Source:HGNC Symbol;Acc:HGNC:30657]	protein_coding	coding	155135344	155138857	1	1	chromosome
ENSG00000174136	134.471	0.249298	0.138551	1.81289	0.0698493	0.515162	RGMB	repulsive guidance molecule family member b [Source:HGNC Symbol;Acc:HGNC:26896]	protein_coding	coding	98768650	98798643	5	1	chromosome
ENSG00000183888	190.242	0.229732	0.126907	1.81289	0.0698482	0.515162	C1orf64	chromosome 1 open reading frame 64 [Source:HGNC Symbol;Acc:HGNC:28339]	protein_coding	coding	16004236	16008807	1	1	chromosome
ENSG00000269893	392.777	-0.221845	0.122091	-1.81245	0.0699167	0.515162	SNHG8	small nucleolar RNA host gene 8 [Source:HGNC Symbol;Acc:HGNC:33098]	lincRNA	noncoding	118278709	118279823	4	1	chromosome
ENSG00000007168	1229.43	-0.160011	0.0882891	-1.81195	0.0699938	0.515284	PAFAH1B1	platelet activating factor acetylhydrolase 1b regulatory subunit 1 [Source:HGNC Symbol;Acc:HGNC:8574]	protein_coding	coding	2593210	2685615	17	1	chromosome
ENSG00000130803	352.129	0.234695	0.12985	1.81187	0.0700068	0.515284	ZNF317	zinc finger protein 317 [Source:HGNC Symbol;Acc:HGNC:13507]	protein_coding	coding	9140380	9163424	19	1	chromosome
ENSG00000064199	73.4951	0.252838	0.139433	1.81071	0.0701857	0.516329	SPA17	sperm autoantigenic protein 17 [Source:HGNC Symbol;Acc:HGNC:11210]	protein_coding	coding	124673798	124697518	11	1	chromosome
ENSG00000111319	70.829	0.208279	0.117557	1.81034	0.0702428	0.51639	SCNN1A	sodium channel epithelial 1 alpha subunit [Source:HGNC Symbol;Acc:HGNC:10599]	protein_coding	coding	6346843	6377730	12	-1	chromosome
ENSG00000122378	1337.07	0.149579	0.0826487	1.80994	0.0703046	0.51639	FAM213A	family with sequence similarity 213 member A [Source:HGNC Symbol;Acc:HGNC:28651]	protein_coding	coding	80407829	80437115	10	1	chromosome
ENSG00000157399	584.837	0.194443	0.107411	1.81014	0.0702734	0.51639	ARSE	arylsulfatase E (chondrodysplasia punctata 1) [Source:HGNC Symbol;Acc:HGNC:719]	protein_coding	coding	2934632	2968310	X	-1	chromosome
ENSG00000066136	635.872	-0.199834	0.110293	-1.80953	0.0703692	0.516594	NFYC	nuclear transcription factor Y subunit gamma [Source:HGNC Symbol;Acc:HGNC:7806]	protein_coding	coding	40691648	40771603	1	1	chromosome
ENSG00000108641	132.633	-0.249581	0.137387	-1.80901	0.07045	0.516916	B9D1	B9 domain containing 1 [Source:HGNC Symbol;Acc:HGNC:24123]	protein_coding	coding	19337554	19378182	17	-1	chromosome
ENSG00000183943	29.4643	0.206718	0.11526	1.80803	0.0706015	0.517757	PRKX	protein kinase, X-linked [Source:HGNC Symbol;Acc:HGNC:9441]	protein_coding	coding	3604370	3713608	X	-1	chromosome
ENSG00000095059	293.421	-0.204459	0.112978	-1.80728	0.0707187	0.518074	DHPS	deoxyhypusine synthase [Source:HGNC Symbol;Acc:HGNC:2869]	protein_coding	coding	12675717	12681902	19	-1	chromosome
ENSG00000214413	157.586	0.242565	0.134179	1.80728	0.0707181	0.518074	BBIP1	BBSome interacting protein 1 [Source:HGNC Symbol;Acc:HGNC:28093]	protein_coding	coding	110898730	110919274	10	-1	chromosome
ENSG00000150712	1030.9	0.173012	0.0958194	1.80645	0.0708478	0.518477	MTMR12	myotubularin related protein 12 [Source:HGNC Symbol;Acc:HGNC:18191]	protein_coding	coding	32226994	32313009	5	-1	chromosome
ENSG00000163110	1353.47	0.133223	0.0737465	1.80668	0.0708116	0.518477	PDLIM5	PDZ and LIM domain 5 [Source:HGNC Symbol;Acc:HGNC:17468]	protein_coding	coding	94451857	94668227	4	1	chromosome
ENSG00000205838	19.4561	0.1378	0.0814554	1.80593	0.0709298	0.518806	TTC23L	tetratricopeptide repeat domain 23 like [Source:HGNC Symbol;Acc:HGNC:26355]	protein_coding	coding	34838833	34899456	5	1	chromosome
ENSG00000106244	1072.6	-0.139625	0.0773191	-1.80534	0.0710222	0.51894	PDAP1	PDGFA associated protein 1 [Source:HGNC Symbol;Acc:HGNC:14634]	protein_coding	coding	99392048	99408829	7	-1	chromosome
ENSG00000273015	156.247	0.245166	0.135665	1.80536	0.0710178	0.51894	AC008124.1	NA	lincRNA	noncoding	45718046	45727775	12	-1	chromosome
ENSG00000054611	320.944	-0.197456	0.109476	-1.80271	0.0714339	0.519619	TBC1D22A	TBC1 domain family member 22A [Source:HGNC Symbol;Acc:HGNC:1309]	protein_coding	coding	46762617	47175699	22	1	chromosome
ENSG00000069667	159.033	0.247485	0.13841	1.80214	0.0715232	0.519619	RORA	RAR related orphan receptor A [Source:HGNC Symbol;Acc:HGNC:10258]	protein_coding	coding	60488284	61229319	15	-1	chromosome
ENSG00000112379	196.264	-0.226982	0.12593	-1.80255	0.071459	0.519619	ARFGEF3	ARFGEF family member 3 [Source:HGNC Symbol;Acc:HGNC:21213]	protein_coding	coding	138161921	138344663	6	1	chromosome
ENSG00000113161	3934.4	-0.112794	0.0625291	-1.80386	0.0712533	0.519619	HMGCR	3-hydroxy-3-methylglutaryl-CoA reductase [Source:HGNC Symbol;Acc:HGNC:5006]	protein_coding	coding	75336329	75362104	5	1	chromosome
ENSG00000135318	320.551	0.203604	0.113004	1.80231	0.0714973	0.519619	NT5E	5'-nucleotidase ecto [Source:HGNC Symbol;Acc:HGNC:8021]	protein_coding	coding	85449584	85495791	6	1	chromosome
ENSG00000163235	366.893	0.19434	0.10779	1.80415	0.0712071	0.519619	TGFA	transforming growth factor alpha [Source:HGNC Symbol;Acc:HGNC:11765]	protein_coding	coding	70447280	70554193	2	-1	chromosome
ENSG00000168056	429.431	-0.199269	0.11051	-1.80276	0.0714257	0.519619	LTBP3	latent transforming growth factor beta binding protein 3 [Source:HGNC Symbol;Acc:HGNC:6716]	protein_coding	coding	65538805	65558930	11	-1	chromosome
ENSG00000176204	11.2742	0.148912	0.0854645	1.80296	0.0713941	0.519619	LRRTM4	leucine rich repeat transmembrane neuronal 4 [Source:HGNC Symbol;Acc:HGNC:19411]	protein_coding	coding	76747719	77593319	2	-1	chromosome
ENSG00000183513	425.444	-0.190409	0.105447	-1.80387	0.0712517	0.519619	COA5	cytochrome c oxidase assembly factor 5 [Source:HGNC Symbol;Acc:HGNC:33848]	protein_coding	coding	98599310	98608515	2	-1	chromosome
ENSG00000185129	272.218	-0.251862	0.139357	-1.80337	0.0713309	0.519619	PURA	purine rich element binding protein A [Source:HGNC Symbol;Acc:HGNC:9701]	protein_coding	coding	140107777	140125619	5	1	chromosome
ENSG00000271936	15.8597	-0.187966	0.105044	-1.80219	0.0715152	0.519619	AC012073.1	NA	antisense_RNA	other	24825610	24826717	2	1	chromosome
ENSG00000164609	607.989	-0.196913	0.109153	-1.80188	0.0715636	0.519643	SLU7	SLU7 homolog, splicing factor [Source:HGNC Symbol;Acc:HGNC:16939]	protein_coding	coding	160401641	160421711	5	-1	chromosome
ENSG00000110367	1592.57	0.228316	0.126922	1.80062	0.071763	0.520365	DDX6	DEAD-box helicase 6 [Source:HGNC Symbol;Acc:HGNC:2747]	protein_coding	coding	118747766	118791149	11	-1	chromosome
ENSG00000136840	203.467	0.243042	0.134636	1.80055	0.0717744	0.520365	ST6GALNAC4	ST6 N-acetylgalactosaminide alpha-2,6-sialyltransferase 4 [Source:HGNC Symbol;Acc:HGNC:17846]	protein_coding	coding	127907886	127917038	9	-1	chromosome
ENSG00000198715	666.56	0.18034	0.100122	1.80092	0.0717162	0.520365	GLMP	glycosylated lysosomal membrane protein [Source:HGNC Symbol;Acc:HGNC:29436]	protein_coding	coding	156290089	156295689	1	-1	chromosome
ENSG00000065328	540.843	-0.170269	0.0946039	-1.79904	0.072013	0.520577	MCM10	minichromosome maintenance 10 replication initiation factor [Source:HGNC Symbol;Acc:HGNC:18043]	protein_coding	coding	13161554	13211104	10	1	chromosome
ENSG00000101191	1764.29	-0.115911	0.0644133	-1.79919	0.0719883	0.520577	DIDO1	death inducer-obliterator 1 [Source:HGNC Symbol;Acc:HGNC:2680]	protein_coding	coding	62877738	62937952	20	-1	chromosome
ENSG00000120910	143.619	0.251149	0.139079	1.79953	0.0719341	0.520577	PPP3CC	protein phosphatase 3 catalytic subunit gamma [Source:HGNC Symbol;Acc:HGNC:9316]	protein_coding	coding	22440819	22541142	8	1	chromosome
ENSG00000168528	187.054	-0.246794	0.136706	-1.79913	0.0719984	0.520577	SERINC2	serine incorporator 2 [Source:HGNC Symbol;Acc:HGNC:23231]	protein_coding	coding	31409565	31434680	1	1	chromosome
ENSG00000181754	34.8825	-0.230126	0.127399	-1.79871	0.0720639	0.520577	AMIGO1	adhesion molecule with Ig like domain 1 [Source:HGNC Symbol;Acc:HGNC:20824]	protein_coding	coding	109504175	109509738	1	-1	chromosome
ENSG00000181830	229.578	-0.245643	0.13631	-1.79946	0.0719453	0.520577	SLC35C1	solute carrier family 35 member C1 [Source:HGNC Symbol;Acc:HGNC:20197]	protein_coding	coding	45804072	45813015	11	1	chromosome
ENSG00000187609	32.127	-0.232877	0.129319	-1.79877	0.0720554	0.520577	EXD3	exonuclease 3'-5' domain containing 3 [Source:HGNC Symbol;Acc:HGNC:26023]	protein_coding	coding	137306896	137423262	9	-1	chromosome
ENSG00000147162	2757.65	-0.142328	0.0791501	-1.79795	0.0721852	0.520688	OGT	O-linked N-acetylglucosamine (GlcNAc) transferase [Source:HGNC Symbol;Acc:HGNC:8127]	protein_coding	coding	71533083	71575897	X	1	chromosome
ENSG00000154473	2110.83	-0.137146	0.0762866	-1.79721	0.0723024	0.520688	BUB3	BUB3, mitotic checkpoint protein [Source:HGNC Symbol;Acc:HGNC:1151]	protein_coding	coding	123154277	123170467	10	1	chromosome
ENSG00000163170	498.862	0.177486	0.0988352	1.79723	0.0722999	0.520688	BOLA3	bolA family member 3 [Source:HGNC Symbol;Acc:HGNC:24415]	protein_coding	coding	74135398	74147994	2	-1	chromosome
ENSG00000171421	304.003	-0.211972	0.11779	-1.79723	0.0722986	0.520688	MRPL36	mitochondrial ribosomal protein L36 [Source:HGNC Symbol;Acc:HGNC:14490]	protein_coding	coding	1798386	1801366	5	-1	chromosome
ENSG00000227057	882.959	0.192333	0.106954	1.79759	0.0722424	0.520688	WDR46	WD repeat domain 46 [Source:HGNC Symbol;Acc:HGNC:13923]	protein_coding	coding	33279108	33289527	6	-1	chromosome
ENSG00000272980	53.9123	0.23393	0.131818	1.79751	0.0722545	0.520688	Z94721.2	NA	processed_transcript	other	166999405	167139141	6	1	chromosome
ENSG00000237775	20.7186	0.17189	0.0988566	1.79632	0.0724437	0.521438	DDR1-AS1	DDR1 antisense RNA 1 (head to head) [Source:HGNC Symbol;Acc:HGNC:28694]	antisense_RNA	other	30866982	30875918	6	-1	chromosome
ENSG00000198258	780.095	-0.170774	0.0950873	-1.79512	0.0726351	0.522547	UBL5	ubiquitin like 5 [Source:HGNC Symbol;Acc:HGNC:13736]	protein_coding	coding	9827892	9830115	19	1	chromosome
ENSG00000077782	1096.64	-0.167146	0.0931029	-1.79461	0.0727166	0.522865	FGFR1	fibroblast growth factor receptor 1 [Source:HGNC Symbol;Acc:HGNC:3688]	protein_coding	coding	38411138	38468834	8	-1	chromosome
ENSG00000094880	794.106	0.14839	0.0827491	1.79391	0.0728268	0.522871	CDC23	cell division cycle 23 [Source:HGNC Symbol;Acc:HGNC:1724]	protein_coding	coding	138187648	138213343	5	-1	chromosome
ENSG00000151135	1106.64	0.144315	0.0804751	1.7939	0.0728294	0.522871	TMEM263	transmembrane protein 263 [Source:HGNC Symbol;Acc:HGNC:28281]	protein_coding	coding	106955719	106978778	12	1	chromosome
ENSG00000170312	1494.79	0.137978	0.0769135	1.794	0.0728139	0.522871	CDK1	cyclin dependent kinase 1 [Source:HGNC Symbol;Acc:HGNC:1722]	protein_coding	coding	60778331	60794852	10	1	chromosome
ENSG00000112659	308.08	0.199553	0.113493	1.79351	0.0728914	0.523048	CUL9	cullin 9 [Source:HGNC Symbol;Acc:HGNC:15982]	protein_coding	coding	43182175	43224587	6	1	chromosome
ENSG00000022840	934.64	-0.188726	0.105299	-1.79284	0.072999	0.523128	RNF10	ring finger protein 10 [Source:HGNC Symbol;Acc:HGNC:10055]	protein_coding	coding	120533480	120577594	12	1	chromosome
ENSG00000037749	285.522	0.248561	0.139436	1.79245	0.0730614	0.523128	MFAP3	microfibril associated protein 3 [Source:HGNC Symbol;Acc:HGNC:7034]	protein_coding	coding	154038906	154220478	5	1	chromosome
ENSG00000115275	1044.39	-0.135406	0.0755269	-1.79241	0.073067	0.523128	MOGS	mannosyl-oligosaccharide glucosidase [Source:HGNC Symbol;Acc:HGNC:24862]	protein_coding	coding	74461057	74465410	2	-1	chromosome
ENSG00000161960	10878.3	-0.109778	0.061263	-1.79181	0.0731639	0.523128	EIF4A1	eukaryotic translation initiation factor 4A1 [Source:HGNC Symbol;Acc:HGNC:3282]	protein_coding	coding	7572706	7579005	17	1	chromosome
ENSG00000167614	97.0933	0.246192	0.138652	1.79183	0.0731605	0.523128	TTYH1	tweety family member 1 [Source:HGNC Symbol;Acc:HGNC:13476]	protein_coding	coding	54415219	54436900	19	1	chromosome
ENSG00000170266	1064.31	0.203729	0.113746	1.79299	0.0729739	0.523128	GLB1	galactosidase beta 1 [Source:HGNC Symbol;Acc:HGNC:4298]	protein_coding	coding	32996608	33097230	3	-1	chromosome
ENSG00000204351	679.136	-0.176061	0.098217	-1.79226	0.0730921	0.523128	SKIV2L	Ski2 like RNA helicase [Source:HGNC Symbol;Acc:HGNC:10898]	protein_coding	coding	31959080	31969755	6	1	chromosome
ENSG00000099998	74.9487	-0.249272	0.139361	-1.78969	0.0735033	0.523151	GGT5	gamma-glutamyltransferase 5 [Source:HGNC Symbol;Acc:HGNC:4260]	protein_coding	coding	24219654	24245142	22	-1	chromosome
ENSG00000103449	353.484	0.248353	0.139436	1.78972	0.0734983	0.523151	SALL1	spalt like transcription factor 1 [Source:HGNC Symbol;Acc:HGNC:10524]	protein_coding	coding	51135975	51151367	16	-1	chromosome
ENSG00000108679	3751.96	-0.0999322	0.0557865	-1.79129	0.0732467	0.523151	LGALS3BP	galectin 3 binding protein [Source:HGNC Symbol;Acc:HGNC:6564]	protein_coding	coding	78971238	78980109	17	-1	chromosome
ENSG00000134717	949.725	0.169593	0.0948165	1.78977	0.0734912	0.523151	BTF3L4	basic transcription factor 3 like 4 [Source:HGNC Symbol;Acc:HGNC:30547]	protein_coding	coding	52056125	52090716	1	1	chromosome
ENSG00000142751	407.357	0.244231	0.136883	1.79022	0.0734184	0.523151	GPN2	GPN-loop GTPase 2 [Source:HGNC Symbol;Acc:HGNC:25513]	protein_coding	coding	26876133	26890297	1	-1	chromosome
ENSG00000164181	168.673	0.247969	0.138831	1.7912	0.0732616	0.523151	ELOVL7	ELOVL fatty acid elongase 7 [Source:HGNC Symbol;Acc:HGNC:26292]	protein_coding	coding	60751791	60844389	5	-1	chromosome
ENSG00000168386	497.859	0.17891	0.100007	1.78991	0.0734685	0.523151	FILIP1L	filamin A interacting protein 1 like [Source:HGNC Symbol;Acc:HGNC:24589]	protein_coding	coding	99830141	100114513	3	-1	chromosome
ENSG00000196924	5158.61	-0.136152	0.0760599	-1.78994	0.0734643	0.523151	FLNA	filamin A [Source:HGNC Symbol;Acc:HGNC:3754]	protein_coding	coding	154348524	154374638	X	-1	chromosome
ENSG00000203667	758.832	0.184169	0.102892	1.79034	0.0733999	0.523151	COX20	COX20, cytochrome c oxidase assembly factor [Source:HGNC Symbol;Acc:HGNC:26970]	protein_coding	coding	244835322	244845057	1	1	chromosome
ENSG00000266412	6240.29	0.107349	0.0599957	1.78923	0.0735771	0.52341	NCOA4	nuclear receptor coactivator 4 [Source:HGNC Symbol;Acc:HGNC:7671]	protein_coding	coding	46005088	46030714	10	-1	chromosome
ENSG00000090316	828.139	-0.154431	0.0863613	-1.78786	0.0737994	0.523648	MAEA	macrophage erythroblast attacher [Source:HGNC Symbol;Acc:HGNC:13731]	protein_coding	coding	1289851	1340147	4	1	chromosome
ENSG00000124523	327.701	0.215776	0.12062	1.78766	0.073831	0.523648	SIRT5	sirtuin 5 [Source:HGNC Symbol;Acc:HGNC:14933]	protein_coding	coding	13574529	13615158	6	1	chromosome
ENSG00000136449	14.3163	0.135331	0.0812183	1.78789	0.073793	0.523648	MYCBPAP	MYCBP associated protein [Source:HGNC Symbol;Acc:HGNC:19677]	protein_coding	coding	50508384	50531501	17	1	chromosome
ENSG00000182774	9682.76	0.118627	0.0663329	1.7884	0.0737114	0.523648	RPS17	ribosomal protein S17 [Source:HGNC Symbol;Acc:HGNC:10397]	protein_coding	coding	82536753	82540564	15	-1	chromosome
ENSG00000184083	129.713	0.246526	0.138987	1.78821	0.0737415	0.523648	FAM120C	family with sequence similarity 120C [Source:HGNC Symbol;Acc:HGNC:16949]	protein_coding	coding	54068324	54183281	X	-1	chromosome
ENSG00000237765	373.192	0.204912	0.114763	1.78745	0.0738655	0.523648	FAM200B	family with sequence similarity 200 member B [Source:HGNC Symbol;Acc:HGNC:27740]	protein_coding	coding	15681662	15705565	4	1	chromosome
ENSG00000248592	32.9464	-0.191698	0.108519	-1.7874	0.0738723	0.523648	TMEM110-MUSTN1	TMEM110-MUSTN1 readthrough [Source:HGNC Symbol;Acc:HGNC:38834]	protein_coding	coding	52833121	52897562	3	-1	chromosome
ENSG00000177954	6225.67	0.138462	0.0774815	1.78695	0.0739458	0.523904	RPS27	ribosomal protein S27 [Source:HGNC Symbol;Acc:HGNC:10416]	protein_coding	coding	153990759	153992150	1	1	chromosome
ENSG00000196839	70.8954	0.242886	0.137119	1.78643	0.0740298	0.524234	ADA	adenosine deaminase [Source:HGNC Symbol;Acc:HGNC:186]	protein_coding	coding	44619522	44652233	20	-1	chromosome
ENSG00000048028	432.271	-0.196364	0.109883	-1.7844	0.0743585	0.526282	USP28	ubiquitin specific peptidase 28 [Source:HGNC Symbol;Acc:HGNC:12625]	protein_coding	coding	113797874	113875570	11	-1	chromosome
ENSG00000109472	5202.55	0.100127	0.0561235	1.78418	0.0743941	0.526282	CPE	carboxypeptidase E [Source:HGNC Symbol;Acc:HGNC:2303]	protein_coding	coding	165361194	165498320	4	1	chromosome
ENSG00000006712	508.619	-0.179023	0.100325	-1.78364	0.0744814	0.526634	PAF1	PAF1 homolog, Paf1/RNA polymerase II complex component [Source:HGNC Symbol;Acc:HGNC:25459]	protein_coding	coding	39385852	39391195	19	-1	chromosome
ENSG00000029993	866.845	0.154674	0.0867651	1.78269	0.0746365	0.527464	HMGB3	high mobility group box 3 [Source:HGNC Symbol;Acc:HGNC:5004]	protein_coding	coding	150980509	150990775	X	1	chromosome
ENSG00000261455	39.1787	-0.234071	0.131372	-1.78216	0.0747232	0.52781	LINC01003	long intergenic non-protein coding RNA 1003 [Source:HGNC Symbol;Acc:HGNC:48957]	lincRNA	noncoding	152463786	152465549	7	1	chromosome
[truncated: 57,728 more rows]

## Sheet: Enriched_GO_BP_of_DEG
id	description	geneRatio	bgRatio	pvalue	pAdjust	qvalue	geneID	count
[truncated: 2,381 more rows]

## Sheet: Enriched_GO_BP_DEG_UP
id	description	geneRatio	bgRatio	pvalue	pAdjust	qvalue	geneID	count
[truncated: 1,186 more rows]

[truncated: 2 more sheets: Enriched_GO_BP_DEG_DOWN, PROGENy]
